# Supplementary material for: Study of DNA Interaction and Cytotoxicity Activity of Oxidovanadium(V) Complexes with ONO Donor Schiff Base Ligands
Source: MDPI journal article supplement (doi:10.3390/inorganics9090066), 2021-08-27
Supplement: s1 [file s1]

Archive with 3 entries (3 files):
- 1.cif
- 1_checkcif.pdf
- ESI.pdf
