# Supplementary material for: Study of DNA Interaction and Cytotoxicity Activity of Oxidovanadium(V) Complexes with ONO Donor Schiff Base Ligands
Source: MDPI journal article supplement (doi:10.3390/inorganics9090066), 2021-08-27
Supplement: s1 [file s1 › 1.cif]

 
data_shelx
 
_audit_creation_method            'SHELXL-2018/3'
_shelx_SHELXL_version_number      '2018/3'
_chemical_name_systematic         ?
_chemical_name_common             ?
_chemical_melting_point           ?
_chemical_formula_moiety         'C13 H8 N2 O7 V, C6 H16 N'
_chemical_formula_sum            'C19 H24 N3 O7 V ' 
_chemical_formula_weight          457.35

loop_
 _atom_type_symbol
 _atom_type_description
 _atom_type_scat_dispersion_real
 _atom_type_scat_dispersion_imag
 _atom_type_scat_source
 'C'  'C'   0.0181   0.0091
 'International Tables Vol C Tables 4.2.6.8 and 6.1.1.4'
 'H'  'H'   0.0000   0.0000
 'International Tables Vol C Tables 4.2.6.8 and 6.1.1.4'
 'N'  'N'   0.0311   0.0180
 'International Tables Vol C Tables 4.2.6.8 and 6.1.1.4'
 'O'  'O'   0.0492   0.0322
 'International Tables Vol C Tables 4.2.6.8 and 6.1.1.4'
 'V'  'V'   0.0687   2.1097
 'International Tables Vol C Tables 4.2.6.8 and 6.1.1.4'
 
_space_group_crystal_system       triclinic
_space_group_IT_number            2
_space_group_name_H-M_alt         'P -1'
_space_group_name_Hall            '-P 1'
 
_shelx_space_group_comment
;
The symmetry employed for this shelxl refinement is uniquely defined
by the following loop, which should always be used as a source of
symmetry information in preference to the above space-group names.
They are only intended as comments.
;
 
loop_
 _space_group_symop_operation_xyz
 'x, y, z'
 '-x, -y, -z'
 
_cell_length_a                    10.82260(10)
_cell_length_b                    10.9399(2)
_cell_length_c                    17.3389(3)
_cell_angle_alpha                 79.4120(10)
_cell_angle_beta                  78.9050(10)
_cell_angle_gamma                 86.8610(10)
_cell_volume                      1979.82(5)
_cell_formula_units_Z             4
_cell_measurement_temperature     100(2)
_cell_measurement_reflns_used     34592
_cell_measurement_theta_min       4.0630
_cell_measurement_theta_max       76.3470
 
_exptl_crystal_description        prism
_exptl_crystal_colour             brown
_exptl_crystal_density_meas       ?
_exptl_crystal_density_method     ?
_exptl_crystal_density_diffrn     1.534          
_exptl_crystal_F_000              952
_exptl_transmission_factor_min    ?
_exptl_transmission_factor_max    ?
_exptl_crystal_size_max           0.241
_exptl_crystal_size_mid           0.192
_exptl_crystal_size_min           0.063
_exptl_absorpt_coefficient_mu     4.621
_shelx_estimated_absorpt_T_min    0.402
_shelx_estimated_absorpt_T_max    0.760
_exptl_absorpt_correction_type    gaussian
_exptl_absorpt_correction_T_max   1.000
_exptl_absorpt_correction_T_min   0.621
_exptl_absorpt_process_details
;
CrysAlisPro
;
_diffrn_ambient_temperature       100(2)
_diffrn_radiation_wavelength      1.54184
_diffrn_radiation_type            CuK\a
_diffrn_ambient_environment       N~2~
_diffrn_measurement_device        'four-circle diffractometer'
_diffrn_measurement_device_type   'XtaLAB Synergy, Dualflex, AtlasS2'
_diffrn_measurement_method        '\w scans'
_diffrn_detector                  'CCD plate'
_diffrn_detector_area_resol_mean  5.2558
_diffrn_detector_type             AtlasS2
_diffrn_reflns_number             46958
_diffrn_reflns_av_unetI/netI      0.0150
_diffrn_reflns_av_R_equivalents   0.0249
_diffrn_reflns_limit_h_min        -12
_diffrn_reflns_limit_h_max        12
_diffrn_reflns_limit_k_min        -13
_diffrn_reflns_limit_k_max        10
_diffrn_reflns_limit_l_min        -20
_diffrn_reflns_limit_l_max        20
_diffrn_reflns_theta_min          4.112
_diffrn_reflns_theta_max          67.078
_diffrn_reflns_theta_full         67.078
_diffrn_measured_fraction_theta_max   1.000
_diffrn_measured_fraction_theta_full  1.000
_diffrn_reflns_Laue_measured_fraction_max    1.000
_diffrn_reflns_Laue_measured_fraction_full   1.000
_diffrn_reflns_point_group_measured_fraction_max   1.000
_diffrn_reflns_point_group_measured_fraction_full  1.000
_reflns_number_total              7061
_reflns_number_gt                 6958
_reflns_threshold_expression      'I > 2\s(I)'
_reflns_Friedel_coverage          0.000
_reflns_Friedel_fraction_max      .
_reflns_Friedel_fraction_full     .
 
_reflns_special_details
;
 Reflections were merged by SHELXL according to the crystal
 class for the calculation of statistics and refinement.
 
 _reflns_Friedel_fraction is defined as the number of unique
 Friedel pairs measured divided by the number that would be
 possible theoretically, ignoring centric projections and
 systematic absences.
;
 
_computing_data_collection        'CrysAlisPro'
_computing_cell_refinement        'CrysAlisPro'
_computing_data_reduction         'CrysAlisPro'
_computing_structure_solution     'SHELXT 2014/5'
_computing_structure_refinement   'SHELXL-2018/3'
_computing_molecular_graphics     'ORTEP-3 for Windows'
_computing_publication_material   'SHELXL-2018/3'
_refine_special_details           ?
_refine_ls_structure_factor_coef  Fsqd
_refine_ls_matrix_type            full
_refine_ls_weighting_scheme       calc
_refine_ls_weighting_details
'w=1/[\s^2^(Fo^2^)+(0.0427P)^2^+0.7922P] where P=(Fo^2^+2Fc^2^)/3'
_atom_sites_solution_primary      direct
_atom_sites_solution_secondary    difmap
_atom_sites_solution_hydrogens    mixed
_refine_ls_hydrogen_treatment     mixed
_refine_ls_extinction_method      none
_refine_ls_extinction_coef        .
_refine_ls_number_reflns          7061
_refine_ls_number_parameters      559
_refine_ls_number_restraints      4
_refine_ls_R_factor_all           0.0257
_refine_ls_R_factor_gt            0.0254
_refine_ls_wR_factor_ref          0.0721
_refine_ls_wR_factor_gt           0.0718
_refine_ls_goodness_of_fit_ref    1.061
_refine_ls_restrained_S_all       1.061
_refine_ls_shift/su_max           0.002
_refine_ls_shift/su_mean          0.000
 
loop_
 _atom_site_label
 _atom_site_type_symbol
 _atom_site_fract_x
 _atom_site_fract_y
 _atom_site_fract_z
 _atom_site_U_iso_or_equiv
 _atom_site_adp_type
 _atom_site_occupancy
 _atom_site_site_symmetry_order  
 _atom_site_calc_flag
 _atom_site_refinement_flags_posn
 _atom_site_refinement_flags_adp
 _atom_site_refinement_flags_occupancy
 _atom_site_disorder_assembly
 _atom_site_disorder_group
V1 V 0.71617(2) 0.46744(2) 0.63707(2) 0.01326(7) Uani 1 1 d . . . . .
O1A O 0.59110(9) 0.41785(8) 0.73059(6) 0.0183(2) Uani 1 1 d . . . . .
O2A O 0.86311(9) 0.56086(8) 0.57271(6) 0.0191(2) Uani 1 1 d . . . . .
O3A O 0.63388(9) 0.47688(9) 0.56721(6) 0.0229(2) Uani 1 1 d . . . . .
O4A O 0.79454(9) 0.33380(8) 0.64421(6) 0.0212(2) Uani 1 1 d . . . . .
O5A O 0.19330(9) 0.40481(9) 0.90251(6) 0.0228(2) Uani 1 1 d D . . . .
H1O H 0.2085(18) 0.3293(10) 0.9014(12) 0.034 Uiso 1 1 d D U . . .
O6A O 1.07069(10) 1.05441(10) 0.62126(7) 0.0294(2) Uani 1 1 d . . . . .
O7A O 0.89979(10) 1.03929(9) 0.71098(6) 0.0244(2) Uani 1 1 d . . . . .
N1A N 0.70263(10) 0.64008(10) 0.68276(6) 0.0143(2) Uani 1 1 d . . . . .
N2A N 0.97149(11) 1.00252(10) 0.65536(7) 0.0197(2) Uani 1 1 d . . . . .
C1A C 0.49681(12) 0.47750(12) 0.76933(7) 0.0145(3) Uani 1 1 d . . . . .
C2A C 0.50203(12) 0.60601(12) 0.77237(8) 0.0150(3) Uani 1 1 d . . . . .
C3A C 0.40153(13) 0.66126(12) 0.82009(8) 0.0168(3) Uani 1 1 d . . . . .
H3A H 0.405123 0.746845 0.822953 0.020 Uiso 1 1 calc R U . . .
C4A C 0.29903(13) 0.59458(12) 0.86233(8) 0.0176(3) Uani 1 1 d . . . . .
H4A H 0.232006 0.633625 0.893605 0.021 Uiso 1 1 calc R U . . .
C5A C 0.29445(12) 0.46719(13) 0.85872(8) 0.0168(3) Uani 1 1 d . . . . .
C6A C 0.39148(12) 0.40987(12) 0.81228(8) 0.0161(3) Uani 1 1 d . . . . .
H6A H 0.386378 0.324362 0.809645 0.019 Uiso 1 1 calc R U . . .
C7A C 0.60748(12) 0.67840(12) 0.73151(8) 0.0149(3) Uani 1 1 d . . . . .
H7A H 0.608839 0.761412 0.740401 0.018 Uiso 1 1 calc R U . . .
C8A C 0.80563(12) 0.71892(12) 0.64810(8) 0.0144(3) Uani 1 1 d . . . . .
C9A C 0.88900(12) 0.67007(12) 0.58740(8) 0.0159(3) Uani 1 1 d . . . . .
C10A C 0.99583(13) 0.73681(13) 0.54623(8) 0.0187(3) Uani 1 1 d . . . . .
H10A H 1.050574 0.706283 0.503895 0.022 Uiso 1 1 calc R U . . .
C11A C 1.02134(13) 0.84762(13) 0.56755(8) 0.0187(3) Uani 1 1 d . . . . .
H11A H 1.093722 0.893408 0.540154 0.022 Uiso 1 1 calc R U . . .
C12A C 0.93980(13) 0.89096(12) 0.62946(8) 0.0169(3) Uani 1 1 d . . . . .
C13A C 0.83135(12) 0.82905(12) 0.67009(8) 0.0161(3) Uani 1 1 d . . . . .
H13A H 0.776425 0.861173 0.711697 0.019 Uiso 1 1 calc R U . . .
V2 V 0.26451(2) 0.04286(2) 0.86672(2) 0.01337(7) Uani 1 1 d . . . . .
O1B O 0.38445(9) 0.11347(8) 0.77712(5) 0.01606(19) Uani 1 1 d . . . . .
O2B O 0.08683(9) 0.01609(9) 0.89877(6) 0.0188(2) Uani 1 1 d . . . . .
O3B O 0.33276(9) -0.07152(9) 0.91909(6) 0.0211(2) Uani 1 1 d . . . . .
O4B O 0.25610(9) 0.16543(9) 0.91042(6) 0.0226(2) Uani 1 1 d . . . . .
O5B O 0.75185(9) 0.14304(9) 0.57764(6) 0.0186(2) Uani 1 1 d D . . . .
H2O H 0.7665(17) 0.1980(13) 0.6026(10) 0.028 Uiso 1 1 d D U . . .
O6B O -0.19919(10) -0.43151(10) 0.84878(7) 0.0285(2) Uani 1 1 d . . . . .
O7B O -0.02745(10) -0.44444(9) 0.76276(7) 0.0263(2) Uani 1 1 d . . . . .
N1B N 0.22168(10) -0.06596(9) 0.78086(6) 0.0138(2) Uani 1 1 d . . . . .
N2B N -0.09410(11) -0.39364(11) 0.81405(7) 0.0197(2) Uani 1 1 d . . . . .
C1B C 0.45333(12) 0.07014(11) 0.71554(7) 0.0136(3) Uani 1 1 d . . . . .
C2B C 0.41136(12) -0.02636(11) 0.68270(8) 0.0146(3) Uani 1 1 d . . . . .
C3B C 0.48916(13) -0.06214(12) 0.61475(8) 0.0166(3) Uani 1 1 d . . . . .
H3B H 0.461880 -0.125798 0.591688 0.020 Uiso 1 1 calc R U . . .
C4B C 0.60261(13) -0.00783(12) 0.58118(8) 0.0167(3) Uani 1 1 d . . . . .
H4B H 0.654173 -0.035156 0.536459 0.020 Uiso 1 1 calc R U . . .
C5B C 0.64194(12) 0.08913(12) 0.61383(8) 0.0148(3) Uani 1 1 d . . . . .
C6B C 0.56764(12) 0.12718(12) 0.68010(8) 0.0152(3) Uani 1 1 d . . . . .
H6B H 0.594818 0.192701 0.701590 0.018 Uiso 1 1 calc R U . . .
C7B C 0.29275(12) -0.08385(11) 0.71462(8) 0.0150(3) Uani 1 1 d . . . . .
H7B H 0.264188 -0.138643 0.685449 0.018 Uiso 1 1 calc R U . . .
C8B C 0.10758(12) -0.12926(12) 0.81278(8) 0.0144(3) Uani 1 1 d . . . . .
C9B C 0.03934(12) -0.07973(12) 0.87845(8) 0.0164(3) Uani 1 1 d . . . . .
C10B C -0.07352(13) -0.13292(13) 0.92095(8) 0.0197(3) Uani 1 1 d . . . . .
H10B H -0.119757 -0.099065 0.964801 0.024 Uiso 1 1 calc R U . . .
C11B C -0.11766(13) -0.23504(13) 0.89893(8) 0.0197(3) Uani 1 1 d . . . . .
H11B H -0.194427 -0.271953 0.927373 0.024 Uiso 1 1 calc R U . . .
C12B C -0.04837(13) -0.28318(12) 0.83461(8) 0.0172(3) Uani 1 1 d . . . . .
C13B C 0.06412(12) -0.23224(12) 0.79056(8) 0.0156(3) Uani 1 1 d . . . . .
H13B H 0.109621 -0.266770 0.746787 0.019 Uiso 1 1 calc R U . . .
N3A N 0.77006(10) 0.57570(10) 0.40533(7) 0.0152(2) Uani 1 1 d D . . . .
H1N H 0.7693(15) 0.5466(14) 0.4559(6) 0.018 Uiso 1 1 d D U . . .
C14A C 0.65446(12) 0.65863(12) 0.40383(8) 0.0171(3) Uani 1 1 d . . . . .
H14A H 0.578458 0.607695 0.424870 0.020 Uiso 1 1 calc R U . . .
H14B H 0.651348 0.697393 0.347941 0.020 Uiso 1 1 calc R U . . .
C15A C 0.65335(13) 0.75988(12) 0.45313(8) 0.0195(3) Uani 1 1 d . . . . .
H15A H 0.665325 0.722281 0.507081 0.029 Uiso 1 1 calc R U . . .
H15B H 0.572391 0.805191 0.456171 0.029 Uiso 1 1 calc R U . . .
H15C H 0.721610 0.817596 0.428002 0.029 Uiso 1 1 calc R U . . .
C16A C 0.89253(13) 0.64430(13) 0.37384(9) 0.0202(3) Uani 1 1 d . . . . .
H16A H 0.898679 0.706323 0.407873 0.024 Uiso 1 1 calc R U . . .
H16B H 0.963672 0.584166 0.378205 0.024 Uiso 1 1 calc R U . . .
C17A C 0.90524(15) 0.71004(14) 0.28813(9) 0.0255(3) Uani 1 1 d . . . . .
H17A H 0.898191 0.649570 0.254008 0.038 Uiso 1 1 calc R U . . .
H17B H 0.987467 0.749578 0.270997 0.038 Uiso 1 1 calc R U . . .
H17C H 0.838316 0.773610 0.283821 0.038 Uiso 1 1 calc R U . . .
C18A C 0.76440(14) 0.46853(12) 0.36271(8) 0.0204(3) Uani 1 1 d . . . . .
H18A H 0.847864 0.425925 0.356028 0.025 Uiso 1 1 calc R U . . .
H18B H 0.746527 0.501558 0.308776 0.025 Uiso 1 1 calc R U . . .
C19A C 0.66551(15) 0.37426(13) 0.40590(10) 0.0267(3) Uani 1 1 d . . . . .
H19A H 0.686170 0.336131 0.457714 0.040 Uiso 1 1 calc R U . . .
H19B H 0.663649 0.309711 0.373755 0.040 Uiso 1 1 calc R U . . .
H19C H 0.582800 0.416017 0.414164 0.040 Uiso 1 1 calc R U . . .
N3B N 0.32917(11) -0.21506(11) 1.07018(7) 0.0182(2) Uani 1 1 d D . . . .
H2N H 0.3229(16) -0.1653(13) 1.0250(7) 0.022 Uiso 1 1 d D U . . .
C14B C 0.40553(14) -0.15083(13) 1.11419(9) 0.0214(3) Uani 1 1 d . . . . .
H14C H 0.494634 -0.149404 1.086640 0.026 Uiso 1 1 calc R U . . .
H14D H 0.401679 -0.198872 1.168843 0.026 Uiso 1 1 calc R U . . .
C15B C 0.35930(14) -0.01872(14) 1.11940(9) 0.0250(3) Uani 1 1 d . . . . .
H15D H 0.351309 0.025911 1.066098 0.038 Uiso 1 1 calc R U . . .
H15E H 0.419626 0.023613 1.140427 0.038 Uiso 1 1 calc R U . . .
H15F H 0.277069 -0.020283 1.155056 0.038 Uiso 1 1 calc R U . . .
C16B C 0.19739(14) -0.23855(15) 1.11680(9) 0.0258(3) Uani 1 1 d . . . . .
H16C H 0.164212 -0.162903 1.138180 0.031 Uiso 1 1 calc R U . . .
H16D H 0.200222 -0.306750 1.162721 0.031 Uiso 1 1 calc R U . . .
C17B C 0.10898(14) -0.27275(16) 1.06693(10) 0.0311(4) Uani 1 1 d . . . . .
H17D H 0.114657 -0.211370 1.017564 0.047 Uiso 1 1 calc R U . . .
H17E H 0.022473 -0.273761 1.097070 0.047 Uiso 1 1 calc R U . . .
H17F H 0.132421 -0.355313 1.053792 0.047 Uiso 1 1 calc R U . . .
C18B C 0.39314(14) -0.33389(13) 1.04954(9) 0.0213(3) Uani 1 1 d . . . . .
H18C H 0.337668 -0.375864 1.023753 0.026 Uiso 1 1 calc R U . . .
H18D H 0.405085 -0.389974 1.099407 0.026 Uiso 1 1 calc R U . . .
C19B C 0.51970(14) -0.31283(13) 0.99434(9) 0.0237(3) Uani 1 1 d . . . . .
H19D H 0.510828 -0.247929 0.948467 0.035 Uiso 1 1 calc R U . . .
H19E H 0.550003 -0.390266 0.975600 0.035 Uiso 1 1 calc R U . . .
H19F H 0.580165 -0.286683 1.023234 0.035 Uiso 1 1 calc R U . . .
 
loop_
 _atom_site_aniso_label
 _atom_site_aniso_U_11
 _atom_site_aniso_U_22
 _atom_site_aniso_U_33
 _atom_site_aniso_U_23
 _atom_site_aniso_U_13
 _atom_site_aniso_U_12
V1 0.01294(12) 0.01110(12) 0.01409(12) -0.00248(8) 0.00225(9) -0.00209(8)
O1A 0.0186(5) 0.0134(4) 0.0193(5) -0.0025(4) 0.0050(4) -0.0013(4)
O2A 0.0179(5) 0.0142(4) 0.0225(5) -0.0053(4) 0.0063(4) -0.0042(4)
O3A 0.0217(5) 0.0267(5) 0.0195(5) -0.0021(4) -0.0022(4) -0.0065(4)
O4A 0.0165(5) 0.0153(5) 0.0289(5) -0.0040(4) 0.0034(4) -0.0021(4)
O5A 0.0154(5) 0.0221(5) 0.0269(5) -0.0032(4) 0.0057(4) -0.0043(4)
O6A 0.0258(6) 0.0269(5) 0.0349(6) -0.0067(5) 0.0006(5) -0.0149(4)
O7A 0.0258(5) 0.0219(5) 0.0267(5) -0.0089(4) -0.0029(4) -0.0030(4)
N1A 0.0140(5) 0.0128(5) 0.0146(5) -0.0005(4) -0.0006(4) -0.0018(4)
N2A 0.0203(6) 0.0179(6) 0.0210(6) -0.0004(5) -0.0062(5) -0.0041(5)
C1A 0.0146(6) 0.0164(6) 0.0116(6) -0.0017(5) -0.0012(5) 0.0003(5)
C2A 0.0148(6) 0.0157(6) 0.0137(6) -0.0018(5) -0.0020(5) 0.0002(5)
C3A 0.0175(7) 0.0154(6) 0.0170(6) -0.0028(5) -0.0027(5) 0.0015(5)
C4A 0.0148(6) 0.0202(7) 0.0166(6) -0.0037(5) -0.0003(5) 0.0031(5)
C5A 0.0135(6) 0.0216(7) 0.0141(6) -0.0002(5) -0.0017(5) -0.0021(5)
C6A 0.0173(6) 0.0150(6) 0.0152(6) -0.0010(5) -0.0020(5) -0.0020(5)
C7A 0.0163(6) 0.0129(6) 0.0155(6) -0.0024(5) -0.0030(5) 0.0002(5)
C8A 0.0126(6) 0.0137(6) 0.0154(6) 0.0010(5) -0.0021(5) -0.0021(5)
C9A 0.0151(6) 0.0142(6) 0.0172(6) -0.0002(5) -0.0021(5) -0.0016(5)
C10A 0.0163(7) 0.0196(7) 0.0180(7) -0.0023(5) 0.0014(5) -0.0022(5)
C11A 0.0155(6) 0.0201(7) 0.0186(7) 0.0015(5) -0.0018(5) -0.0052(5)
C12A 0.0181(7) 0.0136(6) 0.0194(7) -0.0003(5) -0.0061(5) -0.0030(5)
C13A 0.0155(6) 0.0163(6) 0.0157(6) -0.0018(5) -0.0024(5) 0.0007(5)
V2 0.01456(12) 0.01395(12) 0.01052(12) -0.00305(9) 0.00200(9) -0.00325(8)
O1B 0.0176(5) 0.0160(4) 0.0133(4) -0.0047(3) 0.0034(4) -0.0038(4)
O2B 0.0159(5) 0.0209(5) 0.0194(5) -0.0082(4) 0.0024(4) -0.0022(4)
O3B 0.0208(5) 0.0236(5) 0.0175(5) 0.0005(4) -0.0030(4) -0.0036(4)
O4B 0.0253(5) 0.0216(5) 0.0185(5) -0.0080(4) 0.0085(4) -0.0096(4)
O5B 0.0152(5) 0.0191(5) 0.0196(5) -0.0055(4) 0.0048(4) -0.0054(4)
O6B 0.0207(5) 0.0335(6) 0.0301(6) -0.0046(5) 0.0011(4) -0.0139(4)
O7B 0.0242(5) 0.0225(5) 0.0321(6) -0.0102(4) 0.0010(4) -0.0031(4)
N1B 0.0131(5) 0.0126(5) 0.0145(5) -0.0016(4) 0.0000(4) -0.0006(4)
N2B 0.0176(6) 0.0201(6) 0.0206(6) 0.0001(5) -0.0036(5) -0.0043(5)
C1B 0.0153(6) 0.0137(6) 0.0103(6) -0.0005(5) -0.0004(5) 0.0011(5)
C2B 0.0151(6) 0.0130(6) 0.0139(6) -0.0011(5) 0.0002(5) -0.0008(5)
C3B 0.0200(7) 0.0130(6) 0.0167(6) -0.0050(5) -0.0004(5) -0.0014(5)
C4B 0.0170(6) 0.0165(6) 0.0149(6) -0.0044(5) 0.0026(5) 0.0011(5)
C5B 0.0132(6) 0.0144(6) 0.0146(6) 0.0006(5) -0.0001(5) -0.0004(5)
C6B 0.0166(6) 0.0144(6) 0.0143(6) -0.0022(5) -0.0015(5) -0.0026(5)
C7B 0.0165(6) 0.0125(6) 0.0156(6) -0.0031(5) -0.0012(5) -0.0006(5)
C8B 0.0117(6) 0.0153(6) 0.0146(6) -0.0001(5) -0.0011(5) -0.0001(5)
C9B 0.0152(6) 0.0172(6) 0.0164(6) -0.0025(5) -0.0025(5) 0.0010(5)
C10B 0.0141(6) 0.0276(7) 0.0159(6) -0.0053(5) 0.0021(5) 0.0001(5)
C11B 0.0127(6) 0.0263(7) 0.0178(7) -0.0005(5) 0.0002(5) -0.0040(5)
C12B 0.0161(6) 0.0178(6) 0.0178(7) -0.0009(5) -0.0048(5) -0.0023(5)
C13B 0.0136(6) 0.0173(6) 0.0145(6) -0.0015(5) -0.0009(5) 0.0009(5)
N3A 0.0162(6) 0.0150(5) 0.0139(5) -0.0032(4) -0.0016(4) 0.0007(4)
C14A 0.0143(6) 0.0167(6) 0.0203(7) -0.0044(5) -0.0028(5) 0.0013(5)
C15A 0.0210(7) 0.0162(6) 0.0211(7) -0.0053(5) -0.0021(5) 0.0020(5)
C16A 0.0139(6) 0.0221(7) 0.0251(7) -0.0074(6) -0.0013(5) -0.0020(5)
C17A 0.0265(8) 0.0228(7) 0.0246(8) -0.0052(6) 0.0043(6) -0.0070(6)
C18A 0.0241(7) 0.0167(6) 0.0211(7) -0.0085(5) -0.0009(6) 0.0004(5)
C19A 0.0305(8) 0.0177(7) 0.0319(8) -0.0105(6) 0.0016(6) -0.0044(6)
N3B 0.0168(6) 0.0199(6) 0.0172(6) -0.0002(5) -0.0033(5) -0.0030(4)
C14B 0.0204(7) 0.0239(7) 0.0216(7) -0.0052(6) -0.0068(6) -0.0017(5)
C15B 0.0226(7) 0.0236(7) 0.0298(8) -0.0061(6) -0.0057(6) -0.0011(6)
C16B 0.0185(7) 0.0332(8) 0.0227(7) -0.0018(6) 0.0018(6) -0.0059(6)
C17B 0.0188(7) 0.0395(9) 0.0329(9) 0.0002(7) -0.0040(6) -0.0076(6)
C18B 0.0229(7) 0.0178(7) 0.0234(7) -0.0023(5) -0.0054(6) -0.0022(5)
C19B 0.0232(7) 0.0222(7) 0.0253(7) -0.0058(6) -0.0029(6) 0.0005(6)
 
_geom_special_details
;
 All esds (except the esd in the dihedral angle between two l.s. planes)
 are estimated using the full covariance matrix.  The cell esds are taken
 into account individually in the estimation of esds in distances, angles
 and torsion angles; correlations between esds in cell parameters are only
 used when they are defined by crystal symmetry.  An approximate (isotropic)
 treatment of cell esds is used for estimating esds involving l.s. planes.
;
 
loop_
 _geom_bond_atom_site_label_1
 _geom_bond_atom_site_label_2
 _geom_bond_distance
 _geom_bond_site_symmetry_2
 _geom_bond_publ_flag
V1 O3A 1.6219(10) . ?
V1 O4A 1.6463(9) . ?
V1 O1A 1.9152(9) . ?
V1 O2A 1.9735(9) . ?
V1 N1A 2.1658(11) . ?
O1A C1A 1.3200(16) . ?
O2A C9A 1.3216(16) . ?
O5A C5A 1.3462(16) . ?
O5A H1O 0.836(9) . ?
O6A N2A 1.2342(16) . ?
O7A N2A 1.2307(16) . ?
N1A C7A 1.3033(17) . ?
N1A C8A 1.4159(16) . ?
N2A C12A 1.4543(17) . ?
C1A C6A 1.4017(18) . ?
C1A C2A 1.4212(18) . ?
C2A C3A 1.4136(19) . ?
C2A C7A 1.4189(18) . ?
C3A C4A 1.3706(19) . ?
C3A H3A 0.9500 . ?
C4A C5A 1.411(2) . ?
C4A H4A 0.9500 . ?
C5A C6A 1.3901(19) . ?
C6A H6A 0.9500 . ?
C7A H7A 0.9500 . ?
C8A C13A 1.3859(19) . ?
C8A C9A 1.4128(19) . ?
C9A C10A 1.4010(19) . ?
C10A C11A 1.387(2) . ?
C10A H10A 0.9500 . ?
C11A C12A 1.390(2) . ?
C11A H11A 0.9500 . ?
C12A C13A 1.3878(19) . ?
C13A H13A 0.9500 . ?
V2 O3B 1.6356(10) . ?
V2 O4B 1.6473(10) . ?
V2 O1B 1.8942(9) . ?
V2 O2B 1.9191(9) . ?
V2 N1B 2.1968(11) . ?
O1B C1B 1.3272(16) . ?
O2B C9B 1.3235(16) . ?
O5B C5B 1.3454(16) . ?
O5B H2O 0.840(9) . ?
O6B N2B 1.2346(16) . ?
O7B N2B 1.2292(16) . ?
N1B C7B 1.2942(17) . ?
N1B C8B 1.4144(16) . ?
N2B C12B 1.4573(17) . ?
C1B C6B 1.3959(18) . ?
C1B C2B 1.4206(18) . ?
C2B C3B 1.4147(18) . ?
C2B C7B 1.4272(18) . ?
C3B C4B 1.3701(19) . ?
C3B H3B 0.9500 . ?
C4B C5B 1.4106(19) . ?
C4B H4B 0.9500 . ?
C5B C6B 1.3869(19) . ?
C6B H6B 0.9500 . ?
C7B H7B 0.9500 . ?
C8B C13B 1.3877(19) . ?
C8B C9B 1.4124(19) . ?
C9B C10B 1.3955(19) . ?
C10B C11B 1.381(2) . ?
C10B H10B 0.9500 . ?
C11B C12B 1.391(2) . ?
C11B H11B 0.9500 . ?
C12B C13B 1.3915(19) . ?
C13B H13B 0.9500 . ?
N3A C18A 1.5060(17) . ?
N3A C14A 1.5062(16) . ?
N3A C16A 1.5159(17) . ?
N3A H1N 0.875(9) . ?
C14A C15A 1.5167(18) . ?
C14A H14A 0.9900 . ?
C14A H14B 0.9900 . ?
C15A H15A 0.9800 . ?
C15A H15B 0.9800 . ?
C15A H15C 0.9800 . ?
C16A C17A 1.511(2) . ?
C16A H16A 0.9900 . ?
C16A H16B 0.9900 . ?
C17A H17A 0.9800 . ?
C17A H17B 0.9800 . ?
C17A H17C 0.9800 . ?
C18A C19A 1.516(2) . ?
C18A H18A 0.9900 . ?
C18A H18B 0.9900 . ?
C19A H19A 0.9800 . ?
C19A H19B 0.9800 . ?
C19A H19C 0.9800 . ?
N3B C14B 1.5042(17) . ?
N3B C16B 1.5079(18) . ?
N3B C18B 1.5081(18) . ?
N3B H2N 0.879(9) . ?
C14B C15B 1.516(2) . ?
C14B H14C 0.9900 . ?
C14B H14D 0.9900 . ?
C15B H15D 0.9800 . ?
C15B H15E 0.9800 . ?
C15B H15F 0.9800 . ?
C16B C17B 1.510(2) . ?
C16B H16C 0.9900 . ?
C16B H16D 0.9900 . ?
C17B H17D 0.9800 . ?
C17B H17E 0.9800 . ?
C17B H17F 0.9800 . ?
C18B C19B 1.515(2) . ?
C18B H18C 0.9900 . ?
C18B H18D 0.9900 . ?
C19B H19D 0.9800 . ?
C19B H19E 0.9800 . ?
C19B H19F 0.9800 . ?
 
loop_
 _geom_angle_atom_site_label_1
 _geom_angle_atom_site_label_2
 _geom_angle_atom_site_label_3
 _geom_angle
 _geom_angle_site_symmetry_1
 _geom_angle_site_symmetry_3
 _geom_angle_publ_flag
O3A V1 O4A 109.05(5) . . ?
O3A V1 O1A 101.26(5) . . ?
O4A V1 O1A 95.22(4) . . ?
O3A V1 O2A 97.68(5) . . ?
O4A V1 O2A 93.25(4) . . ?
O1A V1 O2A 155.41(4) . . ?
O3A V1 N1A 110.57(5) . . ?
O4A V1 N1A 140.02(5) . . ?
O1A V1 N1A 82.32(4) . . ?
O2A V1 N1A 76.40(4) . . ?
C1A O1A V1 133.25(8) . . ?
C9A O2A V1 120.48(8) . . ?
C5A O5A H1O 106.9(14) . . ?
C7A N1A C8A 120.24(11) . . ?
C7A N1A V1 126.42(9) . . ?
C8A N1A V1 113.07(8) . . ?
O7A N2A O6A 123.16(12) . . ?
O7A N2A C12A 118.70(11) . . ?
O6A N2A C12A 118.12(12) . . ?
O1A C1A C6A 118.60(11) . . ?
O1A C1A C2A 122.05(12) . . ?
C6A C1A C2A 119.25(12) . . ?
C3A C2A C7A 119.46(12) . . ?
C3A C2A C1A 118.80(12) . . ?
C7A C2A C1A 121.69(12) . . ?
C4A C3A C2A 121.73(12) . . ?
C4A C3A H3A 119.1 . . ?
C2A C3A H3A 119.1 . . ?
C3A C4A C5A 119.08(12) . . ?
C3A C4A H4A 120.5 . . ?
C5A C4A H4A 120.5 . . ?
O5A C5A C6A 122.24(12) . . ?
O5A C5A C4A 117.02(12) . . ?
C6A C5A C4A 120.74(12) . . ?
C5A C6A C1A 120.38(12) . . ?
C5A C6A H6A 119.8 . . ?
C1A C6A H6A 119.8 . . ?
N1A C7A C2A 125.21(12) . . ?
N1A C7A H7A 117.4 . . ?
C2A C7A H7A 117.4 . . ?
C13A C8A C9A 120.82(12) . . ?
C13A C8A N1A 127.11(12) . . ?
C9A C8A N1A 112.00(11) . . ?
O2A C9A C10A 122.58(12) . . ?
O2A C9A C8A 117.82(11) . . ?
C10A C9A C8A 119.59(12) . . ?
C11A C10A C9A 119.72(13) . . ?
C11A C10A H10A 120.1 . . ?
C9A C10A H10A 120.1 . . ?
C10A C11A C12A 119.25(12) . . ?
C10A C11A H11A 120.4 . . ?
C12A C11A H11A 120.4 . . ?
C13A C12A C11A 122.58(12) . . ?
C13A C12A N2A 118.30(12) . . ?
C11A C12A N2A 119.06(12) . . ?
C8A C13A C12A 117.96(12) . . ?
C8A C13A H13A 121.0 . . ?
C12A C13A H13A 121.0 . . ?
O3B V2 O4B 108.51(5) . . ?
O3B V2 O1B 108.52(5) . . ?
O4B V2 O1B 94.17(4) . . ?
O3B V2 O2B 105.96(5) . . ?
O4B V2 O2B 92.36(4) . . ?
O1B V2 O2B 140.66(4) . . ?
O3B V2 N1B 95.90(5) . . ?
O4B V2 N1B 155.17(5) . . ?
O1B V2 N1B 81.95(4) . . ?
O2B V2 N1B 76.20(4) . . ?
C1B O1B V2 134.19(8) . . ?
C9B O2B V2 118.34(8) . . ?
C5B O5B H2O 109.2(13) . . ?
C7B N1B C8B 122.54(11) . . ?
C7B N1B V2 127.43(9) . . ?
C8B N1B V2 109.63(8) . . ?
O7B N2B O6B 122.84(12) . . ?
O7B N2B C12B 118.99(11) . . ?
O6B N2B C12B 118.17(12) . . ?
O1B C1B C6B 117.82(11) . . ?
O1B C1B C2B 122.28(11) . . ?
C6B C1B C2B 119.81(12) . . ?
C3B C2B C1B 117.98(12) . . ?
C3B C2B C7B 120.05(12) . . ?
C1B C2B C7B 121.93(12) . . ?
C4B C3B C2B 122.05(12) . . ?
C4B C3B H3B 119.0 . . ?
C2B C3B H3B 119.0 . . ?
C3B C4B C5B 119.20(12) . . ?
C3B C4B H4B 120.4 . . ?
C5B C4B H4B 120.4 . . ?
O5B C5B C6B 122.20(12) . . ?
O5B C5B C4B 117.51(11) . . ?
C6B C5B C4B 120.28(12) . . ?
C5B C6B C1B 120.65(12) . . ?
C5B C6B H6B 119.7 . . ?
C1B C6B H6B 119.7 . . ?
N1B C7B C2B 124.05(12) . . ?
N1B C7B H7B 118.0 . . ?
C2B C7B H7B 118.0 . . ?
C13B C8B C9B 120.42(12) . . ?
C13B C8B N1B 128.35(12) . . ?
C9B C8B N1B 111.10(11) . . ?
O2B C9B C10B 121.69(12) . . ?
O2B C9B C8B 118.07(12) . . ?
C10B C9B C8B 120.23(12) . . ?
C11B C10B C9B 119.66(13) . . ?
C11B C10B H10B 120.2 . . ?
C9B C10B H10B 120.2 . . ?
C10B C11B C12B 119.21(12) . . ?
C10B C11B H11B 120.4 . . ?
C12B C11B H11B 120.4 . . ?
C11B C12B C13B 122.76(12) . . ?
C11B C12B N2B 118.42(12) . . ?
C13B C12B N2B 118.81(12) . . ?
C8B C13B C12B 117.72(12) . . ?
C8B C13B H13B 121.1 . . ?
C12B C13B H13B 121.1 . . ?
C18A N3A C14A 111.46(10) . . ?
C18A N3A C16A 110.83(10) . . ?
C14A N3A C16A 113.72(10) . . ?
C18A N3A H1N 108.9(11) . . ?
C14A N3A H1N 105.1(11) . . ?
C16A N3A H1N 106.4(11) . . ?
N3A C14A C15A 111.92(11) . . ?
N3A C14A H14A 109.2 . . ?
C15A C14A H14A 109.2 . . ?
N3A C14A H14B 109.2 . . ?
C15A C14A H14B 109.2 . . ?
H14A C14A H14B 107.9 . . ?
C14A C15A H15A 109.5 . . ?
C14A C15A H15B 109.5 . . ?
H15A C15A H15B 109.5 . . ?
C14A C15A H15C 109.5 . . ?
H15A C15A H15C 109.5 . . ?
H15B C15A H15C 109.5 . . ?
C17A C16A N3A 113.70(11) . . ?
C17A C16A H16A 108.8 . . ?
N3A C16A H16A 108.8 . . ?
C17A C16A H16B 108.8 . . ?
N3A C16A H16B 108.8 . . ?
H16A C16A H16B 107.7 . . ?
C16A C17A H17A 109.5 . . ?
C16A C17A H17B 109.5 . . ?
H17A C17A H17B 109.5 . . ?
C16A C17A H17C 109.5 . . ?
H17A C17A H17C 109.5 . . ?
H17B C17A H17C 109.5 . . ?
N3A C18A C19A 113.63(11) . . ?
N3A C18A H18A 108.8 . . ?
C19A C18A H18A 108.8 . . ?
N3A C18A H18B 108.8 . . ?
C19A C18A H18B 108.8 . . ?
H18A C18A H18B 107.7 . . ?
C18A C19A H19A 109.5 . . ?
C18A C19A H19B 109.5 . . ?
H19A C19A H19B 109.5 . . ?
C18A C19A H19C 109.5 . . ?
H19A C19A H19C 109.5 . . ?
H19B C19A H19C 109.5 . . ?
C14B N3B C16B 111.23(11) . . ?
C14B N3B C18B 111.47(11) . . ?
C16B N3B C18B 111.16(11) . . ?
C14B N3B H2N 108.0(11) . . ?
C16B N3B H2N 107.4(11) . . ?
C18B N3B H2N 107.4(11) . . ?
N3B C14B C15B 112.49(12) . . ?
N3B C14B H14C 109.1 . . ?
C15B C14B H14C 109.1 . . ?
N3B C14B H14D 109.1 . . ?
C15B C14B H14D 109.1 . . ?
H14C C14B H14D 107.8 . . ?
C14B C15B H15D 109.5 . . ?
C14B C15B H15E 109.5 . . ?
H15D C15B H15E 109.5 . . ?
C14B C15B H15F 109.5 . . ?
H15D C15B H15F 109.5 . . ?
H15E C15B H15F 109.5 . . ?
N3B C16B C17B 112.69(12) . . ?
N3B C16B H16C 109.1 . . ?
C17B C16B H16C 109.1 . . ?
N3B C16B H16D 109.1 . . ?
C17B C16B H16D 109.1 . . ?
H16C C16B H16D 107.8 . . ?
C16B C17B H17D 109.5 . . ?
C16B C17B H17E 109.5 . . ?
H17D C17B H17E 109.5 . . ?
C16B C17B H17F 109.5 . . ?
H17D C17B H17F 109.5 . . ?
H17E C17B H17F 109.5 . . ?
N3B C18B C19B 113.04(11) . . ?
N3B C18B H18C 109.0 . . ?
C19B C18B H18C 109.0 . . ?
N3B C18B H18D 109.0 . . ?
C19B C18B H18D 109.0 . . ?
H18C C18B H18D 107.8 . . ?
C18B C19B H19D 109.5 . . ?
C18B C19B H19E 109.5 . . ?
H19D C19B H19E 109.5 . . ?
C18B C19B H19F 109.5 . . ?
H19D C19B H19F 109.5 . . ?
H19E C19B H19F 109.5 . . ?
 
loop_
 _geom_torsion_atom_site_label_1
 _geom_torsion_atom_site_label_2
 _geom_torsion_atom_site_label_3
 _geom_torsion_atom_site_label_4
 _geom_torsion
 _geom_torsion_site_symmetry_1
 _geom_torsion_site_symmetry_2
 _geom_torsion_site_symmetry_3
 _geom_torsion_site_symmetry_4
 _geom_torsion_publ_flag
V1 O1A C1A C6A 152.01(10) . . . . ?
V1 O1A C1A C2A -31.57(19) . . . . ?
O1A C1A C2A C3A -175.16(12) . . . . ?
C6A C1A C2A C3A 1.24(18) . . . . ?
O1A C1A C2A C7A 2.21(19) . . . . ?
C6A C1A C2A C7A 178.61(12) . . . . ?
C7A C2A C3A C4A -178.35(12) . . . . ?
C1A C2A C3A C4A -0.91(19) . . . . ?
C2A C3A C4A C5A 0.7(2) . . . . ?
C3A C4A C5A O5A 178.61(12) . . . . ?
C3A C4A C5A C6A -0.8(2) . . . . ?
O5A C5A C6A C1A -178.21(12) . . . . ?
C4A C5A C6A C1A 1.2(2) . . . . ?
O1A C1A C6A C5A 175.15(12) . . . . ?
C2A C1A C6A C5A -1.38(19) . . . . ?
C8A N1A C7A C2A -177.10(12) . . . . ?
V1 N1A C7A C2A 9.26(19) . . . . ?
C3A C2A C7A N1A -176.35(12) . . . . ?
C1A C2A C7A N1A 6.3(2) . . . . ?
C7A N1A C8A C13A 12.65(19) . . . . ?
V1 N1A C8A C13A -172.91(11) . . . . ?
C7A N1A C8A C9A -170.20(11) . . . . ?
V1 N1A C8A C9A 4.24(13) . . . . ?
V1 O2A C9A C10A 176.53(10) . . . . ?
V1 O2A C9A C8A -2.42(16) . . . . ?
C13A C8A C9A O2A 175.83(12) . . . . ?
N1A C8A C9A O2A -1.53(17) . . . . ?
C13A C8A C9A C10A -3.14(19) . . . . ?
N1A C8A C9A C10A 179.50(11) . . . . ?
O2A C9A C10A C11A -176.40(12) . . . . ?
C8A C9A C10A C11A 2.5(2) . . . . ?
C9A C10A C11A C12A -0.3(2) . . . . ?
C10A C11A C12A C13A -1.5(2) . . . . ?
C10A C11A C12A N2A 175.72(12) . . . . ?
O7A N2A C12A C13A -1.58(18) . . . . ?
O6A N2A C12A C13A 177.04(12) . . . . ?
O7A N2A C12A C11A -178.94(12) . . . . ?
O6A N2A C12A C11A -0.32(18) . . . . ?
C9A C8A C13A C12A 1.41(19) . . . . ?
N1A C8A C13A C12A 178.34(12) . . . . ?
C11A C12A C13A C8A 0.9(2) . . . . ?
N2A C12A C13A C8A -176.33(11) . . . . ?
O3B V2 O1B C1B 60.37(12) . . . . ?
O4B V2 O1B C1B 171.48(12) . . . . ?
O2B V2 O1B C1B -89.65(13) . . . . ?
N1B V2 O1B C1B -33.19(11) . . . . ?
V2 O1B C1B C6B -152.72(10) . . . . ?
V2 O1B C1B C2B 30.72(18) . . . . ?
O1B C1B C2B C3B 177.14(11) . . . . ?
C6B C1B C2B C3B 0.65(18) . . . . ?
O1B C1B C2B C7B -0.75(19) . . . . ?
C6B C1B C2B C7B -177.24(12) . . . . ?
C1B C2B C3B C4B 0.81(19) . . . . ?
C7B C2B C3B C4B 178.73(12) . . . . ?
C2B C3B C4B C5B -1.8(2) . . . . ?
C3B C4B C5B O5B -177.80(12) . . . . ?
C3B C4B C5B C6B 1.28(19) . . . . ?
O5B C5B C6B C1B 179.19(11) . . . . ?
C4B C5B C6B C1B 0.15(19) . . . . ?
O1B C1B C6B C5B -177.76(11) . . . . ?
C2B C1B C6B C5B -1.11(19) . . . . ?
C8B N1B C7B C2B -176.75(11) . . . . ?
V2 N1B C7B C2B -4.79(18) . . . . ?
C3B C2B C7B N1B 172.79(12) . . . . ?
C1B C2B C7B N1B -9.4(2) . . . . ?
C7B N1B C8B C13B 13.1(2) . . . . ?
V2 N1B C8B C13B -160.13(11) . . . . ?
C7B N1B C8B C9B -171.17(12) . . . . ?
V2 N1B C8B C9B 15.59(12) . . . . ?
V2 O2B C9B C10B 156.50(10) . . . . ?
V2 O2B C9B C8B -22.28(15) . . . . ?
C13B C8B C9B O2B 177.89(11) . . . . ?
N1B C8B C9B O2B 1.78(16) . . . . ?
C13B C8B C9B C10B -0.92(19) . . . . ?
N1B C8B C9B C10B -177.03(11) . . . . ?
O2B C9B C10B C11B -178.17(12) . . . . ?
C8B C9B C10B C11B 0.6(2) . . . . ?
C9B C10B C11B C12B 0.1(2) . . . . ?
C10B C11B C12B C13B -0.5(2) . . . . ?
C10B C11B C12B N2B 177.83(12) . . . . ?
O7B N2B C12B C11B -172.65(12) . . . . ?
O6B N2B C12B C11B 7.92(18) . . . . ?
O7B N2B C12B C13B 5.71(18) . . . . ?
O6B N2B C12B C13B -173.72(12) . . . . ?
C9B C8B C13B C12B 0.55(18) . . . . ?
N1B C8B C13B C12B 175.92(12) . . . . ?
C11B C12B C13B C8B 0.14(19) . . . . ?
N2B C12B C13B C8B -178.15(11) . . . . ?
C18A N3A C14A C15A 174.65(11) . . . . ?
C16A N3A C14A C15A -59.19(14) . . . . ?
C18A N3A C16A C17A 66.36(14) . . . . ?
C14A N3A C16A C17A -60.13(15) . . . . ?
C14A N3A C18A C19A -69.21(15) . . . . ?
C16A N3A C18A C19A 163.06(12) . . . . ?
C16B N3B C14B C15B -68.12(15) . . . . ?
C18B N3B C14B C15B 167.20(12) . . . . ?
C14B N3B C16B C17B 165.65(12) . . . . ?
C18B N3B C16B C17B -69.50(16) . . . . ?
C14B N3B C18B C19B -62.18(15) . . . . ?
C16B N3B C18B C19B 173.11(11) . . . . ?
 
_refine_diff_density_max    0.232
_refine_diff_density_min   -0.575
_refine_diff_density_rms    0.053

_shelx_res_file
;
TITL GS13a
    shelx.res
    created by SHELXL-2018/3 at 15:00:51 on 13-Jul-2021
CELL  1.54184  10.8226  10.9399  17.3389   79.412   78.905   86.861
ZERR        2   0.0001   0.0002   0.0003    0.001    0.001    0.001
LATT   1
SFAC   C    H    N    O    V
UNIT   76   96   12   28   4
MERG   2
FMAP   2
PLAN   10
SIZE     0.063   0.192   0.241
ACTA
BOND   $H
CONF
L.S.  36
TEMP  -173
DFIX  0.84 0.01 O5a H1o O5b H2o
DFIX  0.88 0.01 N3a H1n N3b H2n
WGHT    0.042700    0.792200
FVAR       3.20653
V1    5    0.716168    0.467440    0.637073    11.00000    0.01294    0.01110 =
         0.01409   -0.00248    0.00225   -0.00209
O1A   4    0.591096    0.417846    0.730588    11.00000    0.01860    0.01341 =
         0.01926   -0.00245    0.00503   -0.00135
O2A   4    0.863107    0.560860    0.572714    11.00000    0.01789    0.01417 =
         0.02247   -0.00529    0.00627   -0.00425
O3A   4    0.633881    0.476878    0.567206    11.00000    0.02173    0.02670 =
         0.01945   -0.00210   -0.00220   -0.00651
O4A   4    0.794542    0.333803    0.644208    11.00000    0.01647    0.01532 =
         0.02887   -0.00398    0.00338   -0.00211
O5A   4    0.193295    0.404811    0.902506    11.00000    0.01542    0.02212 =
         0.02689   -0.00320    0.00569   -0.00434
H1O   2    0.208476    0.329347    0.901444    11.00000   -1.50000
O6A   4    1.070686    1.054407    0.621264    11.00000    0.02581    0.02695 =
         0.03487   -0.00666    0.00059   -0.01491
O7A   4    0.899787    1.039292    0.710980    11.00000    0.02578    0.02190 =
         0.02672   -0.00888   -0.00294   -0.00300
N1A   3    0.702628    0.640078    0.682760    11.00000    0.01396    0.01281 =
         0.01463   -0.00051   -0.00061   -0.00176
N2A   3    0.971494    1.002516    0.655355    11.00000    0.02033    0.01789 =
         0.02101   -0.00037   -0.00621   -0.00412
C1A   1    0.496813    0.477495    0.769325    11.00000    0.01461    0.01637 =
         0.01162   -0.00173   -0.00118    0.00032
C2A   1    0.502026    0.606007    0.772373    11.00000    0.01478    0.01574 =
         0.01372   -0.00180   -0.00204    0.00023
C3A   1    0.401526    0.661257    0.820089    11.00000    0.01747    0.01535 =
         0.01699   -0.00276   -0.00271    0.00151
AFIX  43
H3A   2    0.405123    0.746845    0.822953    11.00000   -1.20000
AFIX   0
C4A   1    0.299030    0.594582    0.862329    11.00000    0.01478    0.02018 =
         0.01662   -0.00371   -0.00025    0.00310
AFIX  43
H4A   2    0.232006    0.633625    0.893605    11.00000   -1.20000
AFIX   0
C5A   1    0.294450    0.467187    0.858715    11.00000    0.01351    0.02157 =
         0.01407   -0.00017   -0.00167   -0.00211
C6A   1    0.391483    0.409867    0.812281    11.00000    0.01729    0.01504 =
         0.01520   -0.00100   -0.00196   -0.00195
AFIX  43
H6A   2    0.386378    0.324362    0.809645    11.00000   -1.20000
AFIX   0
C7A   1    0.607480    0.678397    0.731514    11.00000    0.01626    0.01288 =
         0.01550   -0.00243   -0.00300    0.00018
AFIX  43
H7A   2    0.608839    0.761412    0.740401    11.00000   -1.20000
AFIX   0
C8A   1    0.805630    0.718918    0.648102    11.00000    0.01257    0.01366 =
         0.01544    0.00102   -0.00209   -0.00214
C9A   1    0.888998    0.670069    0.587398    11.00000    0.01513    0.01425 =
         0.01720   -0.00022   -0.00207   -0.00160
C10A  1    0.995832    0.736811    0.546235    11.00000    0.01635    0.01963 =
         0.01803   -0.00230    0.00140   -0.00217
AFIX  43
H10A  2    1.050574    0.706283    0.503895    11.00000   -1.20000
AFIX   0
C11A  1    1.021340    0.847624    0.567551    11.00000    0.01550    0.02013 =
         0.01862    0.00148   -0.00183   -0.00516
AFIX  43
H11A  2    1.093722    0.893408    0.540154    11.00000   -1.20000
AFIX   0
C12A  1    0.939796    0.890959    0.629465    11.00000    0.01813    0.01361 =
         0.01941   -0.00031   -0.00609   -0.00297
C13A  1    0.831347    0.829049    0.670091    11.00000    0.01552    0.01627 =
         0.01566   -0.00177   -0.00245    0.00065
AFIX  43
H13A  2    0.776425    0.861173    0.711697    11.00000   -1.20000
AFIX   0
V2    5    0.264512    0.042864    0.866722    11.00000    0.01456    0.01395 =
         0.01052   -0.00305    0.00200   -0.00325
O1B   4    0.384447    0.113470    0.777118    11.00000    0.01757    0.01601 =
         0.01327   -0.00473    0.00344   -0.00385
O2B   4    0.086833    0.016090    0.898771    11.00000    0.01587    0.02092 =
         0.01938   -0.00820    0.00241   -0.00217
O3B   4    0.332762   -0.071522    0.919086    11.00000    0.02081    0.02359 =
         0.01746    0.00053   -0.00303   -0.00358
O4B   4    0.256103    0.165433    0.910418    11.00000    0.02533    0.02163 =
         0.01851   -0.00804    0.00855   -0.00956
O5B   4    0.751851    0.143037    0.577639    11.00000    0.01516    0.01912 =
         0.01962   -0.00554    0.00482   -0.00539
H2O   2    0.766452    0.197957    0.602620    11.00000   -1.50000
O6B   4   -0.199193   -0.431510    0.848782    11.00000    0.02070    0.03347 =
         0.03011   -0.00457    0.00115   -0.01389
O7B   4   -0.027452   -0.444443    0.762761    11.00000    0.02416    0.02246 =
         0.03208   -0.01025    0.00096   -0.00305
N1B   3    0.221683   -0.065958    0.780859    11.00000    0.01307    0.01256 =
         0.01445   -0.00155    0.00003   -0.00063
N2B   3   -0.094101   -0.393636    0.814050    11.00000    0.01760    0.02011 =
         0.02056    0.00007   -0.00363   -0.00425
C1B   1    0.453328    0.070141    0.715536    11.00000    0.01527    0.01374 =
         0.01034   -0.00047   -0.00044    0.00114
C2B   1    0.411364   -0.026362    0.682697    11.00000    0.01514    0.01303 =
         0.01392   -0.00113    0.00025   -0.00080
C3B   1    0.489159   -0.062136    0.614755    11.00000    0.02001    0.01296 =
         0.01673   -0.00502   -0.00041   -0.00140
AFIX  43
H3B   2    0.461880   -0.125798    0.591688    11.00000   -1.20000
AFIX   0
C4B   1    0.602612   -0.007833    0.581185    11.00000    0.01697    0.01651 =
         0.01489   -0.00440    0.00263    0.00107
AFIX  43
H4B   2    0.654173   -0.035156    0.536459    11.00000   -1.20000
AFIX   0
C5B   1    0.641936    0.089133    0.613833    11.00000    0.01316    0.01444 =
         0.01465    0.00062   -0.00008   -0.00045
C6B   1    0.567643    0.127180    0.680102    11.00000    0.01655    0.01435 =
         0.01427   -0.00217   -0.00146   -0.00258
AFIX  43
H6B   2    0.594818    0.192701    0.701590    11.00000   -1.20000
AFIX   0
C7B   1    0.292745   -0.083854    0.714622    11.00000    0.01652    0.01245 =
         0.01555   -0.00308   -0.00123   -0.00057
AFIX  43
H7B   2    0.264188   -0.138643    0.685449    11.00000   -1.20000
AFIX   0
C8B   1    0.107580   -0.129264    0.812776    11.00000    0.01167    0.01527 =
         0.01461   -0.00008   -0.00106   -0.00014
C9B   1    0.039342   -0.079730    0.878448    11.00000    0.01520    0.01725 =
         0.01639   -0.00251   -0.00250    0.00096
C10B  1   -0.073523   -0.132923    0.920948    11.00000    0.01411    0.02755 =
         0.01594   -0.00534    0.00210    0.00008
AFIX  43
H10B  2   -0.119757   -0.099065    0.964801    11.00000   -1.20000
AFIX   0
C11B  1   -0.117657   -0.235039    0.898926    11.00000    0.01269    0.02632 =
         0.01785   -0.00045    0.00017   -0.00404
AFIX  43
H11B  2   -0.194427   -0.271953    0.927373    11.00000   -1.20000
AFIX   0
C12B  1   -0.048374   -0.283184    0.834609    11.00000    0.01615    0.01776 =
         0.01779   -0.00086   -0.00476   -0.00229
C13B  1    0.064122   -0.232239    0.790565    11.00000    0.01364    0.01729 =
         0.01447   -0.00153   -0.00092    0.00088
AFIX  43
H13B  2    0.109621   -0.266770    0.746787    11.00000   -1.20000
AFIX   0
N3A   3    0.770060    0.575700    0.405327    11.00000    0.01616    0.01502 =
         0.01395   -0.00322   -0.00160    0.00068
H1N   2    0.769284    0.546622    0.455888    11.00000   -1.20000
C14A  1    0.654457    0.658631    0.403834    11.00000    0.01433    0.01667 =
         0.02026   -0.00438   -0.00280    0.00132
AFIX  23
H14A  2    0.578458    0.607695    0.424870    11.00000   -1.20000
H14B  2    0.651348    0.697393    0.347941    11.00000   -1.20000
AFIX   0
C15A  1    0.653347    0.759882    0.453133    11.00000    0.02103    0.01623 =
         0.02110   -0.00529   -0.00206    0.00203
AFIX 137
H15A  2    0.665325    0.722281    0.507081    11.00000   -1.50000
H15B  2    0.572391    0.805191    0.456171    11.00000   -1.50000
H15C  2    0.721610    0.817596    0.428002    11.00000   -1.50000
AFIX   0
C16A  1    0.892525    0.644305    0.373844    11.00000    0.01389    0.02214 =
         0.02508   -0.00736   -0.00129   -0.00203
AFIX  23
H16A  2    0.898679    0.706323    0.407873    11.00000   -1.20000
H16B  2    0.963672    0.584166    0.378205    11.00000   -1.20000
AFIX   0
C17A  1    0.905242    0.710043    0.288135    11.00000    0.02652    0.02281 =
         0.02464   -0.00524    0.00426   -0.00699
AFIX 137
H17A  2    0.898191    0.649570    0.254008    11.00000   -1.50000
H17B  2    0.987467    0.749578    0.270997    11.00000   -1.50000
H17C  2    0.838316    0.773610    0.283821    11.00000   -1.50000
AFIX   0
C18A  1    0.764399    0.468532    0.362705    11.00000    0.02411    0.01672 =
         0.02108   -0.00853   -0.00095    0.00037
AFIX  23
H18A  2    0.847864    0.425925    0.356028    11.00000   -1.20000
H18B  2    0.746527    0.501558    0.308776    11.00000   -1.20000
AFIX   0
C19A  1    0.665513    0.374265    0.405903    11.00000    0.03048    0.01769 =
         0.03188   -0.01051    0.00159   -0.00438
AFIX 137
H19A  2    0.686170    0.336131    0.457714    11.00000   -1.50000
H19B  2    0.663649    0.309711    0.373755    11.00000   -1.50000
H19C  2    0.582800    0.416017    0.414164    11.00000   -1.50000
AFIX   0
N3B   3    0.329168   -0.215057    1.070177    11.00000    0.01675    0.01991 =
         0.01717   -0.00021   -0.00331   -0.00299
H2N   2    0.322920   -0.165347    1.025038    11.00000   -1.20000
C14B  1    0.405526   -0.150826    1.114193    11.00000    0.02039    0.02394 =
         0.02156   -0.00521   -0.00684   -0.00173
AFIX  23
H14C  2    0.494634   -0.149404    1.086640    11.00000   -1.20000
H14D  2    0.401679   -0.198872    1.168843    11.00000   -1.20000
AFIX   0
C15B  1    0.359296   -0.018717    1.119404    11.00000    0.02261    0.02364 =
         0.02983   -0.00611   -0.00573   -0.00107
AFIX 137
H15D  2    0.351309    0.025911    1.066098    11.00000   -1.50000
H15E  2    0.419626    0.023613    1.140427    11.00000   -1.50000
H15F  2    0.277069   -0.020283    1.155056    11.00000   -1.50000
AFIX   0
C16B  1    0.197391   -0.238548    1.116804    11.00000    0.01851    0.03319 =
         0.02273   -0.00181    0.00178   -0.00587
AFIX  23
H16C  2    0.164212   -0.162903    1.138180    11.00000   -1.20000
H16D  2    0.200222   -0.306750    1.162721    11.00000   -1.20000
AFIX   0
C17B  1    0.108978   -0.272749    1.066931    11.00000    0.01881    0.03946 =
         0.03295    0.00021   -0.00404   -0.00764
AFIX 137
H17D  2    0.114657   -0.211370    1.017564    11.00000   -1.50000
H17E  2    0.022473   -0.273761    1.097070    11.00000   -1.50000
H17F  2    0.132421   -0.355313    1.053792    11.00000   -1.50000
AFIX   0
C18B  1    0.393136   -0.333891    1.049542    11.00000    0.02293    0.01780 =
         0.02335   -0.00227   -0.00541   -0.00218
AFIX  23
H18C  2    0.337668   -0.375864    1.023753    11.00000   -1.20000
H18D  2    0.405085   -0.389974    1.099407    11.00000   -1.20000
AFIX   0
C19B  1    0.519703   -0.312834    0.994339    11.00000    0.02323    0.02221 =
         0.02534   -0.00577   -0.00288    0.00052
AFIX 137
H19D  2    0.510828   -0.247929    0.948467    11.00000   -1.50000
H19E  2    0.550003   -0.390266    0.975600    11.00000   -1.50000
H19F  2    0.580165   -0.286683    1.023234    11.00000   -1.50000

AFIX   0
HKLF    4


REM  GS13a
REM wR2 = 0.0721, GooF = S = 1.061, Restrained GooF = 1.061 for all data
REM R1 = 0.0254 for 6958 Fo > 4sig(Fo) and 0.0257 for all 7061 data
REM 559 parameters refined using 4 restraints

END

WGHT      0.0419      0.8169

REM Highest difference peak  0.232,  deepest hole -0.575,  1-sigma level  0.053
Q1    1   0.6234  0.0387  0.6004  11.00000  0.05    0.23
Q2    1   0.4305  0.0139  0.7008  11.00000  0.05    0.23
Q3    1   0.3583 -0.0530  0.7011  11.00000  0.05    0.22
Q4    1   0.2285 -0.0186  0.8150  11.00000  0.05    0.21
Q5    1   0.1617 -0.1018  0.7968  11.00000  0.05    0.21
Q6    1   0.0622 -0.1038  0.8408  11.00000  0.05    0.20
Q7    1   0.4991  0.1132  0.6842  11.00000  0.05    0.20
Q8    1   0.5136  0.5423  0.7827  11.00000  0.05    0.20
Q9    1   0.5462  0.6370  0.7428  11.00000  0.05    0.20
Q10   1   0.4407 -0.0237  0.6454  11.00000  0.05    0.19
;
_shelx_res_checksum   97648

_shelx_hkl_file
;
   0   0  -2 53192.8 1026.69   1
   0   0  -3 2829.10 97.2251   1
   0   0  -4 431127. 8077.81   1
   0   0  -5 489.984 47.9357   1
   0   0  -6 66015.6 1360.33   1
   0   0  -7 733.121 73.9139   1
   0   0  -7 785.595 36.2611   2
   0   0   8 9482.83 251.934  45
   0   0  -8 10225.3 338.900   1
   0   0  -8 10149.8 224.350   2
   0   0  -9 9279.77 338.000   1
   0   0  -9 8855.06 210.501   2
   0   0 -10 324.506 59.4472   1
   0   0  10 465.911 76.3495  47
   0   0  10 379.820 31.8860  13
   0   0  10 364.397 30.6049   7
   0   0 -10 324.567 28.7297   2
   0   0 -11 3061.83 205.440   1
   0   0  11 2829.79 102.029   7
   0   0  11 3136.34 106.159  13
   0   0  11 2857.10 197.058  47
   0   0 -11 2893.30 102.404   2
   0   0  11 2965.41 103.310  35
   0   0  11 2881.62 104.524  36
   0   0  12 5488.13 157.794  30
   0   0  12 5891.58 167.102  13
   0   0 -12 5590.51 165.119   2
   0   0  12 5447.56 292.177  47
   0   0  12 5507.10 163.559   7
   0   0  12 5554.48 164.379  35
   0   0 -13 752.276 53.3344   2
   0   0  13 762.004 53.5882   7
   0   0  13 701.765 45.8378  30
   0   0  13 697.160 107.689  47
   0   0  13 795.925 55.6369  35
   0   0  13 679.199 51.6144  13
   0   0 -14 25293.6 552.018   2
   0   0  14 25134.4 553.016  35
   0   0  14 26284.9 554.703  13
   0   0 -14 24299.2 551.411   9
   0   0  14 25308.6 788.720  47
   0   0 -15 1048.38 68.6487   9
   0   0  15 1056.40 67.8242  13
   0   0  15 1065.81 142.612  47
   0   0 -16 1309.24 76.8910   9
   0   0  16 1388.61 76.4778  13
   0   0  16 1176.82 143.776  47
   0   0 -17 1535.65 81.0545   9
   0   0  17 1601.73 79.9825  13
   0   0  18 3290.32 106.096  11
   0   0 -18 3512.48 121.559   9
   0   0  18 3531.27 118.228  13
   0   0  19 201.354 24.8901  29
   0   0  19 205.649 26.5130  13
   0   0  19 205.035 28.3065   6
   0   0  20 6028.23 146.577  29
   0   0  20 6370.22 160.103   6
   0  -1  19 5398.33 143.856  29
   0  -1  19 5184.18 144.976   6
   0  -1  19 5182.50 138.422  13
   0   1 -18 1040.20 55.0109   9
   0  -1  18 951.728 47.2644  34
   0  -1  18 931.628 57.3453   6
   0  -1  18 924.533 54.0140  13
   0  -1  17 2659.88 106.775   6
   0  -1  17 2768.47 103.681  13
   0  -1  17 2710.24 92.8431  11
   0   1 -17 2706.46 102.798   9
   0  -1  16 417.087 34.8215  30
   0  -1  16 414.915 41.1652  13
   0   1 -16 456.816 44.0432   9
   0  -1  15 10196.2 451.104  47
   0   1 -15 10587.6 271.372   9
   0  -1  15 10815.5 271.420  13
   0  -1  15 10419.9 259.308  30
   0  -1  14 19.9870 51.8769  47
   0  -1  14-3.43939 19.8695  30
   0  -1  14 22.0819 22.2324  13
   0   1 -14 0.34879 23.1557   9
   0  -1  14-12.6662 25.3698  35
   0   1 -13 10414.3 256.944   2
   0  -1  13 9769.18 254.841  30
   0   1 -13 9638.61 253.092   9
   0  -1  13 10779.9 441.205  47
   0  -1  13 9539.74 256.528  35
   0  -1  13 10214.4 257.394  13
   0  -1  12 6488.50 179.678  13
   0  -1  12 6651.20 324.834  47
   0  -1  12 6266.25 180.343   7
   0  -1  12 6370.21 180.395  35
   0   1 -12 6234.40 178.337   2
   0  -1  12 6300.48 183.971  36
   0  -1  12 6196.60 181.279  30
   0   1 -11 22911.9 493.918   2
   0  -1  11 22923.6 494.940  35
   0  -1  11 23930.6 502.254  36
   0  -1  11 23765.9 498.213   7
   0  -1  11 21709.9 673.912  47
   0  -1  11 21590.0 499.147  30
   0  -1  11 24204.5 496.883  13
   0  -1  10 31779.6 642.666  33
   0   1 -10 32106.7 633.353   2
   0  -1  10 31647.1 633.466  13
   0  -1  10 30812.7 815.061  47
   0  -1  10 30029.9 630.910  35
   0  -1  10 30213.7 636.417  36
   0  -1  10 30520.6 634.236   7
   0  -1   9 1983.48 147.083  47
   0   1  -9 1802.81 136.222   1
   0   1  -9 1966.56 72.0990   2
   0  -1   8 757.428 85.0438  47
   0   1  -8 675.677 75.6354   1
   0   1  -8 704.555 37.1794   2
   0   1  -7 42161.2 945.065   1
   0  -1   7 43020.8 959.617  47
   0   1  -6 820.574 68.3715   1
   0  -1   6 904.759 76.9058  47
   0   1  -5 136548. 2627.19   1
   0  -1   5 135334. 2649.15  47
   0  -1   4 86108.5 1672.65  44
   0  -1   4 85594.0 1677.66   3
   0  -1   4 90287.3 1739.19  47
   0   1  -4 83886.0 1709.36   1
   0  -1   3 56058.2 1050.21  23
   0   1  -3 52889.4 1061.87   1
   0  -1   3 54634.6 1088.87  47
   0  -1   3 54528.2 1051.58  44
   0  -1   3 53909.0 1051.02   3
   0  -1   2 414.602 26.7639  23
   0  -1   2 409.452 25.8246   3
   0  -1   2 448.660 28.0282  44
   0   1  -2 402.889 22.7784   1
   0  -1   1 50381.2 944.772  23
   0  -1   1 49439.3 941.738   3
   0  -1   1 47259.4 944.235  44
   0  -1   1 47662.3 945.043  47
   0  -1   0 807.434 37.8776   3
   0  -1   0 836.026 27.1757   1
   0  -1   0 805.356 39.1127  44
   0  -1   0 828.315 39.0792  46
   0  -1  -1 42221.6 861.496   4
   0  -1  -1 42047.2 860.581   3
   0  -1  -1 45367.4 865.535  23
   0  -1  -1 46682.7 867.981  44
   0  -1  -1 44223.5 858.913   1
   0  -1  -1 46773.2 866.213  46
   0  -1  -2 915.891 41.5105   3
   0  -1  -2 913.436 42.4865  23
   0  -1  -2 973.836 49.0305   1
   0  -1  -3 33284.0 637.716  44
   0  -1  -3 31586.9 635.853   3
   0  -1  -3 32675.4 637.189  23
   0  -1  -4 9629.00 224.797   3
   0  -1  -4 9805.44 265.899   1
   0  -1  -4 10274.0 222.653  44
   0  -1  -4 9995.15 221.305  23
   0  -1  -5 93540.4 1855.86   1
   0  -1  -6 8825.52 277.848   1
   0  -1  -7 5612.46 136.515   2
   0  -1  -7 5300.80 217.788   1
   0  -1  -8 69.7164 32.5436   1
   0  -1  -8 33.5670 10.3345   2
   0  -1  -9 12490.5 419.748   1
   0  -1  -9 12851.4 283.803   2
   0  -1 -10 18817.0 403.938   2
   0  -1 -10 18960.1 578.362   1
   0  -1 -11 3903.81 237.409   1
   0   1  11 3894.65 125.185   7
   0   1  11 4281.39 129.915  13
   0   1  11 3990.53 125.420  35
   0  -1 -11 3905.81 124.206   2
   0  -1 -12 10984.7 273.441   2
   0  -1 -12 11335.3 459.243   1
   0   1  12 11674.0 278.493  13
   0   1  12 10559.0 432.641  47
   0   1  12 11277.5 274.237   7
   0   1  12 11018.8 272.656  35
   0   1  13 1120.33 136.613  47
   0  -1 -13 1334.91 71.1787   2
   0   1  13 1247.10 70.4975  13
   0   1  13 1326.66 69.8072  35
   0   1  13 1174.76 67.6286   7
   0  -1 -14 619.903 51.3649   2
   0   1  14 516.506 48.1827  13
   0  -1 -14 598.021 52.2730   9
   0  -1 -15 12085.5 304.780   2
   0  -1 -15 11290.5 304.008   9
   0   1  15 12001.9 501.860  47
   0   1  15 12432.3 307.368  13
   0  -1 -16 188.391 37.8812   9
   0   1  16 175.986 37.0310  13
   0   1  16 127.088 48.7834  47
   0   1  17 1838.67 89.7973  13
   0  -1 -17 1640.83 88.3439   9
   0   1  18 4575.16 147.432  13
   0  -1 -18 4537.58 150.698   9
   0   1  19 7831.94 200.207  13
   0   1  19 7585.82 183.862  29
   0   1  19 7711.74 199.324   6
   0  -1 -19 7875.48 203.235   9
   0   1  20 4077.83 117.369  13
   0   1  20 3905.23 115.970   6
   0  -2  19 1730.69 66.6374  29
   0  -2  19 1676.93 57.9961  13
   0  -2  18 10167.1 234.245  34
   0  -2  18 10634.3 241.531  13
   0  -2  17 56.5729 19.3022  34
   0  -2  17 71.8831 17.5372  30
   0   2 -17 37.7150 17.8593   9
   0  -2  17 87.7095 29.1015   6
   0  -2  17 46.0731 18.6150  13
   0   2 -16 1111.08 61.3263   9
   0  -2  16 977.240 57.1370  30
   0  -2  16 1008.86 66.5280   6
   0  -2  16 1064.75 60.5412  13
   0  -2  16 1086.73 60.6180  34
   0  -2  16 1053.30 53.3306  11
   0  -2  15 1841.03 84.4149  13
   0  -2  15 2070.60 183.003  47
   0  -2  15 1849.58 76.5817  11
   0   2 -15 1868.20 83.6651   9
   0  -2  15 1799.07 85.1468  30
   0  -2  14 13209.5 510.570  47
   0  -2  14 12879.8 319.646  35
   0  -2  14 12876.8 311.148  13
   0   2 -14 13125.8 310.981   9
   0  -2  14 12710.9 320.613  30
   0  -2  13 816.842 53.9483  13
   0  -2  13 873.187 119.376  47
   0   2 -13 797.732 53.0014   9
   0  -2  13 742.787 55.2822  35
   0  -2  13 766.453 56.6944  30
   0  -2  12 189.277 61.6842  47
   0   2 -12 199.275 27.7655   9
   0  -2  12 227.781 32.0459  35
   0  -2  12 182.378 31.3984  30
   0  -2  12 236.247 35.1003  36
   0  -2  12 212.065 27.7704  13
   0  -2  11 3971.29 128.582  35
   0  -2  11 4237.32 246.749  47
   0  -2  11 4134.15 132.651   7
   0  -2  11 4180.49 128.705  13
   0  -2  11 4162.63 139.472  30
   0  -2  11 3944.09 131.776  36
   0  -2  10 41956.4 837.929   7
   0  -2  10 41580.3 847.999  30
   0  -2  10 41888.6 831.754  13
   0  -2  10 42910.0 841.293  36
   0  -2  10 40931.6 844.643  33
   0  -2  10 40346.7 833.172  35
   0  -2  10 43524.9 1045.81  47
   0  -2   9 794.820 45.7501   7
   0  -2   9 670.425 86.2679  47
   0  -2   9 622.175 40.9336  36
   0  -2   9 631.349 43.3074  33
   0  -2   9 661.005 40.3608  35
   0  -2   8 22686.2 614.178  47
   0  -2   7 3747.51 183.698  47
   0  -2   6 21020.4 540.753  47
   0  -2   5 4208.14 141.313  44
   0  -2   5 4181.36 136.518  23
   0  -2   5 4227.51 144.348   3
   0  -2   5 4245.20 174.101  47
   0  -2   4 19363.2 465.293  47
   0  -2   4 19013.6 435.275  44
   0  -2   4 18700.2 431.774   3
   0  -2   4 19203.2 430.668  23
   0  -2   3 5160.93 158.845  23
   0  -2   3 5031.54 161.389  44
   0  -2   3 5197.24 171.520  47
   0  -2   3 4973.94 155.709   3
   0  -2   2 117558. 2242.78  23
   0  -2   2 118735. 2248.50  44
   0  -2   2 115620. 2243.96  47
   0  -2   2 114114. 2235.64   3
   0  -2   1 42596.2 876.294  44
   0  -2   1 41919.0 865.844   3
   0  -2   1 43607.1 874.445  23
   0  -2   0 139128. 2621.39   3
   0  -2   0 140611. 2573.10   1
   0  -2  -1 1669.88 81.1056  44
   0  -2  -1 1660.76 65.0546   1
   0  -2  -1 1582.89 76.1232   3
   0  -2  -2 7812.73 218.841  23
   0  -2  -2 8339.43 224.332  44
   0  -2  -2 7978.01 209.651   1
   0  -2  -2 8105.53 216.568   3
   0  -2  -3 4445.22 146.173  44
   0  -2  -3 4211.96 140.265   3
   0  -2  -3 4513.64 148.723   1
   0  -2  -3 4221.96 143.130  23
   0  -2  -4 222146. 4329.49   1
   0  -2  -4 228493. 4304.76  23
   0  -2  -4 220073. 4299.39   3
   0  -2  -5 198.268 37.9771   1
   0  -2  -5 151.946 24.1197   3
   0  -2  -5 170.113 27.2122  23
   0  -2  -5 119.525 23.8182  44
   0  -2  -6 38808.6 741.256   2
   0  -2  -6 38541.1 790.316  44
   0  -2  -6 37333.8 796.172   3
   0  -2  -6 36081.6 852.017   1
   0  -2  -6 37913.8 787.698  23
   0  -2  -7 4492.24 203.984   1
   0  -2  -7 4864.94 122.886   2
   0  -2  -8 110494. 2050.98   2
   0  -2  -8 96832.0 2204.26   1
   0  -2  -9 1857.58 143.095   1
   0  -2  -9 1822.53 69.3343   2
   0   2  10 11655.9 280.764  13
   0  -2 -10 12191.3 439.403   1
   0  -2 -10 12683.1 281.686   2
   0  -2 -11 7895.36 358.306   1
   0  -2 -11 8179.07 209.251   2
   0   2  11 8255.96 205.072  35
   0   2  11 7779.33 205.542   7
   0   2  11 8220.93 211.752  13
   0  -2 -12 47585.3 1205.08   1
   0   2  12 48810.0 938.328   7
   0   2  12 47606.5 940.936  13
   0   2  12 49289.6 933.699  35
   0  -2 -13 234.971 75.5570   1
   0   2  13 272.645 31.6947   7
   0  -2 -13 336.312 37.3139   2
   0  -2 -13 324.556 41.3312   9
   0   2  13 313.223 38.7815  13
   0  -2 -14 13308.4 321.450   2
   0   2  14 12899.0 322.727  13
   0  -2 -14 12746.1 326.033   9
   0   2  15 2651.10 221.429  47
   0  -2 -15 2677.06 111.344   2
   0  -2 -15 2562.61 114.713   9
   0   2  15 2715.32 114.754  13
   0  -2 -16 3076.20 129.988   9
   0   2  16 3355.58 130.451  13
   0  -2 -16 3399.58 127.396   2
   0   2  17 104.139 32.7418  13
   0  -2 -17 117.840 36.3819   9
   0  -2 -18 4444.50 151.216   9
   0   2  18 4558.78 150.011  13
   0   2  19 96.4434 26.2707  13
   0  -2 -19 48.3122 23.1635   9
   0   2  20 4890.19 136.580   6
   0   2  20 5043.44 140.351  13
   0  -3  18 2284.80 80.6337  29
   0  -3  18 1989.71 64.8770  30
   0  -3  18 2046.16 65.0224  34
   0  -3  18 2233.09 78.4949   6
   0  -3  17 2380.89 87.3205  30
   0  -3  17 2568.84 85.6182  34
   0  -3  17 2604.43 84.4303  13
   0  -3  16 360.301 33.4220  34
   0  -3  16 344.871 30.8358  13
   0  -3  16 349.018 38.9436   6
   0   3 -16 356.971 30.0683   9
   0  -3  16 359.238 38.0042  30
   0   3 -15 8833.77 216.502   9
   0  -3  15 8517.54 236.440  30
   0  -3  15 8484.93 232.863   6
   0  -3  15 8761.40 224.164  34
   0  -3  15 8585.85 219.159  13
   0  -3  14 444.644 40.7949  13
   0  -3  14 441.756 47.2978  30
   0  -3  14 493.153 37.4243  11
   0  -3  14 458.133 43.0639  34
   0   3 -14 470.443 38.8217   9
   0  -3  14 456.702 95.1360  47
   0  -3  14 482.523 48.9250   6
   0  -3  13 257.396 31.8098  13
   0   3 -13 263.650 31.6444   9
   0  -3  13 330.136 31.7941  11
   0  -3  13 306.711 74.6951  47
   0  -3  13 310.014 41.8127  35
   0  -3  13 259.144 38.8794  30
   0  -3  12 8550.68 209.826  11
   0  -3  12 9069.53 390.049  47
   0  -3  12 8661.82 226.388  35
   0   3 -12 8270.46 213.951   9
   0  -3  12 8228.35 214.647  13
   0  -3  12 8069.93 227.298  36
   0  -3  12 8064.14 233.642  30
   0  -3  11 16645.8 370.829  11
   0  -3  11 17178.8 394.918  33
   0  -3  11 17184.8 384.997  35
   0  -3  11 16795.1 389.138  36
   0  -3  11 17263.6 400.202  30
   0  -3  11 17567.9 378.691  13
   0  -3  11 17013.1 569.304  47
   0   3 -11 16816.9 375.782   9
   0  -3  10 4208.30 135.570  36
   0  -3  10 4378.44 126.436  11
   0  -3  10 4493.71 134.808  35
   0  -3  10 4379.35 141.081  33
   0  -3  10 4375.86 128.957  13
   0  -3  10 4857.43 257.431  47
   0  -3  10 4435.84 143.946  30
   0  -3   9 33602.8 689.265  17
   0  -3   9 33687.8 676.653  13
   0  -3   9 33879.2 682.244  35
   0  -3   9 34579.3 875.656  47
   0  -3   9 34357.7 685.560   7
   0  -3   9 32051.2 683.842  36
   0  -3   9 32985.1 693.850  30
   0  -3   9 34166.3 693.858  33
   0  -3   8 1495.37 67.6396  30
   0  -3   8 1577.73 129.042  47
   0  -3   8 1566.15 64.8264  36
   0  -3   7 47601.7 1089.92  47
   0  -3   6 12425.9 333.818  23
   0  -3   6 12185.8 344.158   3
   0  -3   6 12935.9 388.583  47
   0  -3   5 4217.66 164.758  23
   0  -3   5 4300.63 172.032  44
   0  -3   5 4609.74 191.956  47
   0  -3   5 4371.95 172.104   3
   0  -3   4 1647.05 98.7060  44
   0  -3   4 1566.01 100.752  47
   0  -3   4 1629.67 95.8087  23
   0  -3   4 1601.93 94.1176   3
   0  -3   3 1273.78 83.2763  23
   0  -3   3 1212.55 80.8781   3
   0  -3   3 1156.55 81.7793  47
   0  -3   3 1091.48 80.3203  44
   0  -3   2 2692.83 129.458  44
   0  -3   2 2771.78 129.300  23
   0  -3   2 2628.92 122.223   3
   0  -3   1 67.9156 23.2495   3
   0  -3   1 55.0556 24.8356  44
   0  -3   1 47.4739 20.7977  23
   0  -3   0 28268.4 580.069   1
   0  -3   0 29116.6 665.117  44
   0  -3  -1 33704.4 737.767  44
   0  -3  -1 31814.7 714.637   3
   0  -3  -1 32534.3 667.803   1
   0  -3  -2 26530.4 613.767  44
   0  -3  -2 26413.9 567.823   1
   0  -3  -2 25923.1 596.750   3
   0  -3  -2 25886.6 609.120  23
   0  -3  -3 3783.85 157.988  44
   0  -3  -3 3444.70 152.061  23
   0  -3  -3 3732.05 150.335   3
   0  -3  -3 3805.41 143.115   1
   0  -3  -4 3230.75 145.234  23
   0  -3  -4 3368.93 144.175   3
   0  -3  -4 3453.42 148.913  44
   0  -3  -4 3447.19 145.420   1
   0  -3  -5 42669.2 950.298   1
   0  -3  -5 43599.7 939.105  23
   0  -3  -5 44383.3 935.294   3
   0  -3  -5 43292.8 937.008  44
   0  -3  -6 6663.85 224.337  44
   0  -3  -6 6363.46 223.365  23
   0  -3  -6 7155.42 160.573   2
   0  -3  -6 6325.12 223.186   3
   0  -3  -6 6721.87 251.953   1
   0  -3  -7 1440.39 116.116   1
   0  -3  -7 1409.80 90.7698  23
   0  -3  -7 1513.47 56.4341   2
   0  -3  -7 1343.26 90.1550   3
   0  -3  -7 1559.68 94.7903  44
   0  -3  -8 6060.08 273.680   1
   0  -3  -8 6986.59 170.141   2
   0  -3  -9 479.168 78.3320   1
   0  -3  -9 489.868 35.4576   2
   0  -3 -10 4420.20 252.636   1
   0  -3 -10 4626.97 135.102   2
   0  -3 -11 335.359 77.7291   1
   0  -3 -11 405.769 38.1642   2
   0   3  11 430.388 37.6807  13
   0  -3 -12 1883.12 84.2081   2
   0   3  12 1889.41 80.5897   7
   0  -3 -12 1705.27 169.837   1
   0   3  12 1910.30 86.4117  13
   0  -3 -13 5265.71 317.185   1
   0  -3 -13 5478.14 174.342   9
   0   3  13 5325.52 169.885  13
   0  -3 -13 5582.74 169.532   2
   0  -3 -14 8382.03 244.330   9
   0   3  14 9008.95 245.170  13
   0  -3 -14 8053.36 420.600   1
   0  -3 -14 9130.54 242.947   2
   0   3  15 16002.1 624.801  47
   0   3  15 16949.2 404.034  13
   0  -3 -15 17032.9 398.931   2
   0  -3 -15 16597.9 405.093   9
   0  -3 -16 491.909 49.0620   2
   0   3  16 417.424 94.4534  47
   0   3  16 481.178 51.4528  13
   0  -3 -16 450.312 50.5383   9
   0   3  17 673.640 57.0230  13
   0  -3 -17 632.490 56.8027   9
   0   3  18 33.3993 26.3765  13
   0  -3 -18 35.1499 26.0928   9
   0  -3 -19 6596.83 179.994   9
   0   3  19 6048.57 176.802  13
   0   3  20 965.497 51.0416  13
   0  -3 -20 948.080 44.0763  25
   0   3  20 1042.36 50.0551   6
   0  -4  17 683.661 36.4379  34
   0  -4  17 784.960 44.2340   6
   0  -4  17 712.247 44.3358  29
   0  -4  17 667.402 42.0762  30
   0  -4  17 772.019 45.9203  39
   0  -4  17 671.313 38.3516  20
   0  -4  16 307.091 36.1915   6
   0  -4  16 229.018 30.1847  30
   0  -4  16 260.509 26.7415  34
   0  -4  15 29.9343 15.6206  13
   0  -4  15 4.75231 18.6852  34
   0  -4  15 34.6952 25.2346  30
   0  -4  15 30.7819 24.5798   6
   0  -4  14 14117.0 350.164  30
   0  -4  14 14393.6 337.408   6
   0  -4  14 14564.7 331.978  34
   0  -4  14 13799.6 317.841  13
   0  -4  13 4249.41 142.209   6
   0  -4  13 4118.25 152.584  30
   0  -4  13 4398.77 130.270  13
   0  -4  13 4264.32 139.196  34
   0  -4  12 84.6356 31.2901  30
   0  -4  12 123.726 21.7889  13
   0  -4  12 178.289 33.7300  35
   0  -4  12 130.804 29.3254  34
   0  -4  12 134.024 31.5898   6
   0  -4  11 326.464 38.0663  33
   0  -4  11 332.053 37.0089  35
   0  -4  11 268.768 33.9405  34
   0  -4  11 363.646 32.8764  13
   0  -4  11 290.188 38.7540  30
   0  -4  11 313.356 38.3667  36
   0  -4  11 331.006 80.1104  47
   0  -4  11 324.014 37.3689   6
   0  -4  10 58007.9 1094.49  13
   0  -4  10 56178.6 1106.94  35
   0  -4  10 55803.0 1106.28  34
   0  -4  10 55492.4 1120.87  30
   0  -4  10 53924.1 1110.13  36
   0  -4  10 58230.8 1118.22  33
   0  -4  10 55049.9 1106.06   6
   0  -4  10 57668.7 1343.86  47
   0  -4   9 301.859 30.7013   6
   0  -4   9 296.660 33.7943  33
   0  -4   9 301.801 30.3728  35
   0  -4   9 349.628 36.3858  30
   0  -4   9 280.339 31.8774  36
   0  -4   9 272.695 32.6387  17
   0  -4   9 251.229 63.5468  47
   0  -4   8 170.901 24.2273  17
   0  -4   8 177.397 23.0632   6
   0  -4   8 188.140 25.5808  36
   0  -4   8 228.157 25.0828  35
   0  -4   8 172.213 51.2058  47
   0  -4   8 215.748 27.1431  33
   0  -4   7 70.2686 16.2941  36
   0  -4   7 68.3573 15.9059  17
   0  -4   7 63.4927 17.2966  30
   0  -4   7 37.1584 33.1239  47
   0  -4   6 16927.2 489.005  47
   0  -4   6 16217.3 451.131  23
   0  -4   6 16156.3 460.904  44
   0  -4   6 16183.5 460.329   3
   0  -4   5 1031.53 45.3696  48
   0  -4   5 988.854 88.0008   3
   0  -4   5 1024.01 88.2852  23
   0  -4   5 1000.15 90.6468  44
   0  -4   5 1003.94 43.8957  42
   0  -4   5 1002.41 44.8646  43
   0  -4   4 1323.15 52.8935  43
   0  -4   4 1328.70 50.5855  42
   0  -4   4 1226.75 102.643  44
   0  -4   4 1304.18 51.8926  48
   0  -4   4 1364.57 103.111  23
   0  -4   4 1348.03 101.719   3
   0  -4   3 2928.36 148.284   3
   0  -4   3 2557.23 80.9724  43
   0  -4   3 2819.75 80.3433  42
   0  -4   3 2467.77 143.291  23
   0  -4   3 2635.83 150.726  44
   0  -4   3 2661.82 82.1694  48
   0  -4   2 705.915 76.3286  23
   0  -4   2 729.456 37.2468  43
   0  -4   2 726.442 34.5469  42
   0  -4   2 669.231 76.3877  44
   0  -4   2 770.738 37.9063  48
   0  -4   2 769.765 74.2487   3
   0  -4   1 146.834 17.0010  43
   0  -4   1 164.086 16.4655  42
   0  -4   1 142.150 16.8714  48
   0  -4   1 144.889 39.7380  44
   0  -4   1 99.1053 35.4180  23
   0  -4   0 278.429 21.0107  49
   0  -4   0 269.135 20.7499  42
   0  -4   0 255.687 45.1802  23
   0  -4   0 305.073 52.5031  44
   0  -4   0 243.166 21.0962  43
   0  -4   0 324.341 28.1400   1
   0  -4   0 344.593 52.3621   3
   0  -4   0 328.104 24.3065  48
   0  -4  -1 149.196 37.6533  23
   0  -4  -1 185.529 18.8597  43
   0  -4  -1 156.715 17.3465  48
   0  -4  -1 173.267 16.9647  42
   0  -4  -1 185.279 25.7148   1
   0  -4  -1 181.923 40.6659   3
   0  -4  -1 183.488 45.5894  44
   0  -4  -1 193.620 17.8080  49
   0  -4  -2 12772.5 396.972  23
   0  -4  -2 12926.6 282.570  42
   0  -4  -2 14416.3 413.874  44
   0  -4  -2 13472.2 339.482   1
   0  -4  -2 13413.2 284.070  49
   0  -4  -2 14068.0 290.202  43
   0  -4  -2 12976.0 381.698   3
   0  -4  -2 13701.6 289.020  48
   0  -4  -3 7814.15 182.174  43
   0  -4  -3 8000.71 178.645  49
   0  -4  -3 7719.86 240.827   1
   0  -4  -3 7831.31 268.847   3
   0  -4  -3 7801.59 181.560  48
   0  -4  -3 7218.76 277.701  23
   0  -4  -3 7754.52 283.914  44
   0  -4  -3 7653.44 176.961  42
   0  -4  -4 11261.2 348.525   3
   0  -4  -4 11354.0 250.179  43
   0  -4  -4 11103.3 359.368  44
   0  -4  -4 11483.2 246.710  42
   0  -4  -4 11640.3 250.869  48
   0  -4  -4 11338.2 330.821   1
   0  -4  -4 10544.0 352.680  23
   0  -4  -5 56585.2 1241.70  23
   0  -4  -5 56776.0 1094.39  48
   0  -4  -5 56671.2 1086.16   2
   0  -4  -5 58478.0 1226.93   1
   0  -4  -5 58290.8 1244.53  44
   0  -4  -5 56180.3 1090.96  42
   0  -4  -5 56730.7 1227.15   3
   0  -4  -5 57010.7 1094.62  43
   0  -4  -6 202.117 19.2277   2
   0  -4  -6 180.690 44.3885  44
   0  -4  -6 205.041 19.4254  42
   0  -4  -6 157.018 17.8586  43
   0  -4  -6 257.453 48.3753   3
   0  -4  -6 204.496 44.3143   1
   0  -4  -6 155.902 38.7103  23
   0  -4  -6 230.644 20.3714  48
   0  -4  -7 442.862 28.4851  48
   0  -4  -7 432.198 68.5461   1
   0  -4  -7 441.081 60.7238  44
   0  -4  -7 467.940 63.8484   3
   0  -4  -7 555.120 33.0548   2
   0  -4  -7 451.553 28.4856  42
   0  -4  -7 417.775 28.1819  43
   0  -4  -7 447.873 61.2117  23
   0  -4  -8 40537.1 926.633  23
   0  -4  -8 40377.2 926.753  44
   0  -4  -8 41129.5 924.047   3
   0  -4  -8 40352.1 986.698   1
   0  -4  -8 39552.6 792.502   2
   0  -4  -9 31930.7 825.065   1
   0  -4  -9 29341.2 606.756   2
   0  -4 -10 780.287 107.668   1
   0  -4 -10 648.026 45.1189   9
   0  -4 -10 773.143 48.1979   2
   0   4  11 4868.11 151.171  13
   0  -4 -11 5122.03 150.075   2
   0  -4 -11 4464.65 275.993   1
   0  -4 -11 4556.32 147.836   9
   0  -4 -12 38425.8 793.734   9
   0  -4 -12 38151.9 789.050   2
   0   4  12 39486.7 797.234  13
   0   4  13 9644.37 259.302  13
   0  -4 -13 9388.95 255.841   9
   0  -4 -13 10184.8 259.163   2
   0  -4 -13 9594.90 454.948   1
   0  -4 -14 2378.95 103.824   2
   0  -4 -14 2314.01 222.090   1
   0   4  14 2365.13 105.949  13
   0  -4 -14 2374.19 106.038   9
   0   4  15 1800.18 92.8533  13
   0  -4 -15 1715.73 89.1141   9
   0  -4 -15 1632.57 87.1191   2
   0   4  16 1254.63 167.444  47
   0  -4 -16 1349.91 72.3510  38
   0  -4 -16 1425.07 81.6731   9
   0  -4 -16 1349.09 77.8932   2
   0   4  16 1324.01 79.3050  13
   0   4  17 1683.41 88.4136  13
   0  -4 -17 1726.13 87.2558   2
   0  -4 -17 1679.39 87.0366   9
   0  -4 -17 1794.56 78.6185  38
   0  -4 -18 31.5341 26.9099   9
   0   4  18 32.8845 25.1625  13
   0   4  19 106.681 24.9701  13
   0  -4 -20 3428.03 101.281  25
   0   4  20 3263.94 95.0015   6
   0  -4 -20 3393.29 94.6875  32
   0   4  20 3463.51 104.100  13
   0  -5  17 11652.5 242.225  39
   0  -5  17 11683.9 242.803  29
   0  -5  17 10135.0 223.138  34
   0  -5  17 10647.9 237.380  30
   0  -5  17 9783.62 226.999  20
   0  -5  16 1354.77 62.5684  29
   0  -5  16 1384.65 60.2607   6
   0  -5  16 1409.29 63.8976  39
   0  -5  16 1328.50 58.9382  20
   0  -5  16 1337.42 55.2179  34
   0  -5  16 1284.36 63.5448  30
   0  -5  15 5345.42 162.234  30
   0  -5  15 5327.46 147.222  34
   0  -5  15 5544.57 156.627  39
   0  -5  15 5195.96 150.902   6
   0  -5  14 383.062 39.9762   6
   0  -5  14 380.973 37.7329  34
   0  -5  14 339.830 40.8636  30
   0  -5  13 2094.52 90.2188   6
   0  -5  13 2150.41 89.7800  34
   0  -5  13 2129.04 100.414  30
   0  -5  12 929.126 59.0578  34
   0  -5  12 891.068 65.6663  30
   0  -5  12 841.308 56.7856   6
   0  -5  11 8524.62 229.867  34
   0  -5  11 8717.11 238.336  36
   0  -5  11 9093.78 232.801  35
   0  -5  11 9605.32 254.098  30
   0  -5  11 9085.50 233.380   6
   0  -5  11 8820.38 235.001  33
   0  -5  10 7630.53 222.140  30
   0  -5  10 8223.04 213.120  35
   0  -5  10 7735.85 210.628  34
   0  -5  10 7866.11 225.290  17
   0  -5  10 7958.60 215.739  33
   0  -5  10 8415.21 212.963   6
   0  -5  10 8051.04 218.232  36
   0  -5   9 428.579 42.6132  17
   0  -5   9 454.097 44.7189  30
   0  -5   9 625.864 45.3466  33
   0  -5   9 540.858 41.3885  35
   0  -5   9 592.243 46.1791  36
   0  -5   9 517.836 40.4464   6
   0  -5   9 444.825 39.1332  34
   0  -5   8 16602.1 366.096  35
   0  -5   8 16661.7 380.307  30
   0  -5   8 16330.2 369.498  34
   0  -5   8 16059.8 372.909  12
   0  -5   8 16198.6 384.598  17
   0  -5   8 16994.6 367.432   6
   0  -5   8 16799.8 373.915  33
   0  -5   8 17359.8 374.894  36
   0  -5   7 7279.04 203.077  17
   0  -5   7 7067.98 193.791  12
   0  -5   7 7451.64 192.291  33
   0  -5   7 7444.97 191.936  36
   0  -5   7 7602.69 188.538   6
   0  -5   7 7650.05 198.600  30
   0  -5   7 7510.46 186.639  35
   0  -5   7 7510.25 191.884  34
   0  -5   6 3188.51 107.455  30
   0  -5   6 3341.99 101.236  42
   0  -5   6 3250.30 100.777   6
   0  -5   6 3136.35 111.467  17
   0  -5   6 3255.79 104.008  34
   0  -5   6 3321.17 187.147  23
   0  -5   6 3333.45 103.685  36
   0  -5   6 3240.89 187.678   3
   0  -5   5 457.600 70.0195  23
   0  -5   5 368.329 64.4350  44
   0  -5   5 478.459 69.2015   3
   0  -5   5 499.555 35.4457  48
   0  -5   5 481.073 33.0158  42
   0  -5   5 444.269 32.8291  43
   0  -5   5 453.129 32.6734  34
   0  -5   4 4668.60 132.679  43
   0  -5   4 4779.21 242.159  44
   0  -5   4 4664.06 131.967  48
   0  -5   4 4726.76 230.095  23
   0  -5   4 4674.09 127.931  42
   0  -5   4 4630.13 224.038   3
   0  -5   3 27968.6 581.344  48
   0  -5   3 28776.0 759.228  44
   0  -5   3 29244.9 750.449  23
   0  -5   3 29107.8 735.116   3
   0  -5   3 29076.3 575.957  42
   0  -5   3 28134.6 582.650  43
   0  -5   2 1529.05 132.249  44
   0  -5   2 1638.43 61.7383  42
   0  -5   2 1599.41 65.1022  48
   0  -5   2 1346.62 119.976  23
   0  -5   2 1665.27 125.734   3
   0  -5   2 1479.96 63.8936  43
   0  -5   1 379.644 68.6529  44
   0  -5   1 379.312 30.4840  48
   0  -5   1 349.443 66.5409  23
   0  -5   1 374.136 30.7572  43
   0  -5   1 386.808 28.1375  42
   0  -5   1 395.996 61.7222   3
   0  -5   0 528.714 75.5968  44
   0  -5   0 661.196 36.4348  42
   0  -5   0 591.192 38.0645  43
   0  -5   0 564.850 37.0115  48
   0  -5   0 616.133 83.7862  23
   0  -5   0 625.537 80.2804   3
   0  -5  -1 58147.6 1098.77  42
   0  -5  -1 55527.2 1296.18  23
   0  -5  -1 57125.6 1107.24  43
   0  -5  -1 58515.4 1267.94   3
   0  -5  -1 55247.5 1144.36   1
   0  -5  -1 57514.4 1303.95  44
   0  -5  -1 55509.9 1106.19  48
   0  -5  -2 127.146 21.4500  43
   0  -5  -2 105.196 42.1157  23
   0  -5  -2 97.3327 16.7941  42
   0  -5  -2 133.124 46.5694  44
   0  -5  -2 118.463 40.7013   3
   0  -5  -2 130.545 26.7331   1
   0  -5  -2 117.263 19.1446  48
   0  -5  -3 17603.3 371.172  43
   0  -5  -3 17510.6 530.671  44
   0  -5  -3 16203.4 490.972   3
   0  -5  -3 17763.6 371.203  48
   0  -5  -3 16597.5 360.550  42
   0  -5  -3 15948.3 516.121  23
   0  -5  -3 16731.3 439.656   1
   0  -5  -4 965.999 49.2427  43
   0  -5  -4 975.215 46.2109  42
   0  -5  -4 897.909 37.7184   2
   0  -5  -4 975.592 49.9455  48
   0  -5  -4 1015.72 108.164  44
   0  -5  -4 1010.23 83.8346   1
   0  -5  -4 789.585 98.7890  23
   0  -5  -4 1059.52 100.935   3
   0  -5  -5 61456.0 1189.69  42
   0  -5  -5 61157.3 1397.23  23
   0  -5  -5 62330.1 1177.69   2
   0  -5  -5 59673.5 1194.88  48
   0  -5  -5 61657.7 1196.19  43
   0  -5  -5 62329.9 1368.48   3
   0  -5  -5 65570.2 1411.30  44
   0  -5  -5 60724.7 1327.40   1
   0  -5  -6 30888.4 616.890  48
   0  -5  -6 31698.0 770.303   1
   0  -5  -6 31138.4 612.271  42
   0  -5  -6 29659.6 794.901  23
   0  -5  -6 31181.4 617.867  43
   0  -5  -6 31437.5 807.175  44
   0  -5  -6 31370.2 780.728   3
   0  -5  -7 6488.77 162.630   2
   0  -5  -7 6671.12 169.908  48
   0  -5  -7 6352.01 286.303  44
   0  -5  -7 6378.50 278.157   1
   0  -5  -7 6493.63 169.158  43
   0  -5  -7 6597.59 281.247   3
   0  -5  -7 6535.40 166.163  42
   0  -5  -7 6294.18 284.111  23
   0  -5  -8 2524.36 84.4369  42
   0  -5  -8 2357.29 86.4672  43
   0  -5  -8 2369.40 167.506  23
   0  -5  -8 2498.91 85.0904   2
   0  -5  -8 2349.68 166.766  44
   0  -5  -8 2450.97 86.5769  48
   0  -5  -8 2491.01 177.024   1
   0  -5  -8 2509.53 163.836   3
   0  -5  -9 22603.6 468.495   2
   0  -5  -9 21529.7 627.108  23
   0  -5  -9 21982.7 487.245  22
   0  -5  -9 23236.0 682.828   1
   0  -5  -9 21451.6 487.031  41
   0  -5 -10 325.775 35.4683  22
   0  -5 -10 304.477 34.7380  41
   0  -5 -10 222.501 70.9887   1
   0  -5 -10 342.720 32.6285   9
   0  -5 -10 311.479 32.5223   2
   0  -5 -11 495.695 43.8065   2
   0  -5 -11 515.136 42.6494   9
   0   5  11 513.644 42.6120  13
   0  -5 -11 451.794 41.9297  41
   0  -5 -12 10245.7 458.186   1
   0  -5 -12 10004.4 256.792   9
   0   5  12 10010.5 262.989  13
   0  -5 -12 10182.5 259.225   2
   0  -5 -13 23622.8 519.057   9
   0  -5 -13 24179.7 523.384   2
   0  -5 -13 22880.2 784.038   1
   0   5  13 23136.1 524.789  13
   0   5  14 21779.5 499.971  13
   0  -5 -14 21823.8 491.925   9
   0  -5 -14 21396.0 767.846   1
   0  -5 -14 22813.2 498.943   2
   0  -5 -15 1897.23 90.6434   9
   0   5  15 1820.65 92.6073  13
   0  -5 -15 1870.49 93.2744   2
   0  -5 -15 2005.71 93.5348  38
   0  -5 -16 354.190 43.4252   2
   0   5  16 356.917 43.6349  13
   0  -5 -16 362.362 40.7311  38
   0  -5 -16 445.376 45.9074   9
   0  -5 -17 3640.86 122.550  38
   0  -5 -17 3460.87 123.880   9
   0   5  17 3593.11 128.925  13
   0  -5 -18 2650.13 91.3849  38
   0   5  18 2648.93 101.274  13
   0   5  19 290.683 29.7943  13
   0  -5 -19 310.750 32.8455  25
   0  -6  16 779.820 35.5920  34
   0  -6  16 737.828 38.3472  20
   0  -6  16 795.783 41.9507  39
   0  -6  16 823.919 42.5207  30
   0  -6  16 776.868 40.7046  29
   0  -6  15 378.590 29.7240  34
   0  -6  15 299.728 33.2635  30
   0  -6  15 406.130 34.6386  29
   0  -6  15 425.387 37.8119  39
   0  -6  15 351.873 32.2503  20
   0  -6  14 1778.76 72.7881  34
   0  -6  14 1722.78 76.9825  20
   0  -6  14 1755.81 76.5787  29
   0  -6  14 1855.13 80.2068  39
   0  -6  14 1670.46 79.8855  30
   0  -6  13 1488.22 79.2328  30
   0  -6  13 1580.29 77.1019  39
   0  -6  13 1504.51 72.1635   6
   0  -6  13 1546.05 71.5206  34
   0  -6  12 3833.24 127.813  34
   0  -6  12 3916.34 127.674   6
   0  -6  12 3862.96 132.118  39
   0  -6  12 3570.10 135.132  30
   0  -6  11 197.282 36.4150  30
   0  -6  11 331.180 36.4738   6
   0  -6  11 237.700 32.8247  34
   0  -6  11 284.686 39.0898  39
   0  -6  10 394.382 39.0834   6
   0  -6  10 442.221 43.2984  39
   0  -6  10 456.383 40.3772  33
   0  -6  10 360.216 39.7116  34
   0  -6  10 304.745 42.5219  30
   0  -6   9 70.4336 20.0254  12
   0  -6   9 100.679 26.6037  34
   0  -6   9 46.3522 18.4746   6
   0  -6   9 61.5192 20.0018  33
   0  -6   9 93.3745 30.7840  30
   0  -6   9 83.1416 27.0107  36
   0  -6   9 61.5904 23.6694  39
   0  -6   9 74.4996 20.8905  35
   0  -6   9 114.107 33.5832  17
   0  -6   8 11152.4 269.095  36
   0  -6   8 11116.0 269.068  39
   0  -6   8 10854.2 262.038   6
   0  -6   8 10705.3 272.882  12
   0  -6   8 10555.2 265.378  34
   0  -6   8 11125.6 283.307  17
   0  -6   8 10871.3 277.225  30
   0  -6   8 10667.5 263.090  33
   0  -6   8 11041.6 258.775  35
   0  -6   7 296.635 28.1134  35
   0  -6   7 337.548 34.0105  33
   0  -6   7 316.070 34.8775  12
   0  -6   7 334.867 33.4280  36
   0  -6   7 303.600 30.4352   6
   0  -6   7 245.639 34.1423  17
   0  -6   7 326.994 36.1393  30
   0  -6   7 322.104 35.0893  39
   0  -6   6 35136.9 727.944  39
   0  -6   6 36256.0 729.493  34
   0  -6   6 36708.2 727.600  36
   0  -6   6 35657.4 743.540  17
   0  -6   6 36413.6 942.849  23
   0  -6   6 35978.4 723.800   6
   0  -6   6 35822.8 717.021  35
   0  -6   6 36330.1 737.042  30
   0  -6   6 35643.2 724.464  33
   0  -6   6 35523.2 741.581  12
   0  -6   5 923.282 116.431  44
   0  -6   5 972.176 58.2810  12
   0  -6   5 926.279 48.6576  33
   0  -6   5 1041.09 53.2292  42
   0  -6   5 1033.35 53.9034  39
   0  -6   5 1024.44 53.8857  34
   0  -6   5 947.203 111.321   3
   0  -6   5 1000.23 51.2008  36
   0  -6   5 1066.92 56.4597  30
   0  -6   5 1047.54 57.9795  43
   0  -6   5 997.054 56.7010  24
   0  -6   5 1088.37 60.2678  17
   0  -6   5 1099.02 122.960  23
   0  -6   5 1024.24 50.5377   6
   0  -6   4 5217.87 147.008  42
   0  -6   4 5380.01 155.908  24
   0  -6   4 5224.54 145.914  30
   0  -6   4 5226.16 286.834  44
   0  -6   4 5065.77 142.891  34
   0  -6   4 4938.89 154.394   5
   0  -6   4 5267.17 154.206  48
   0  -6   4 5065.50 151.387  21
   0  -6   4 5432.78 279.280  23
   0  -6   4 5350.33 158.301  10
   0  -6   4 4891.27 259.912   3
   0  -6   4 5088.90 153.264  12
   0  -6   4 5583.46 148.354  39
   0  -6   4 5153.27 153.675  43
   0  -6   3 4632.17 268.100  44
   0  -6   3 4670.77 261.146  23
   0  -6   3 4847.20 136.687  42
   0  -6   3 4606.98 141.493  48
   0  -6   3 4593.08 141.354  12
   0  -6   3 4473.75 245.065   3
   0  -6   3 4610.14 143.357  43
   0  -6   3 4760.33 133.420  39
   0  -6   3 4605.33 131.145  34
   0  -6   2 6013.68 157.999  34
   0  -6   2 5985.31 170.707  48
   0  -6   2 6300.55 164.641  42
   0  -6   2 6157.43 172.692  43
   0  -6   2 6103.46 289.785   3
   0  -6   2 5944.30 308.715  44
   0  -6   2 6070.45 303.205  23
   0  -6   1 5958.89 283.206   3
   0  -6   1 5829.81 167.999  48
   0  -6   1 6226.14 162.340  42
   0  -6   1 5997.20 169.783  43
   0  -6   1 6082.22 311.610  44
   0  -6   1 5881.10 300.765  23
   0  -6   0 1387.15 130.625   3
   0  -6   0 1241.25 139.689  44
   0  -6   0 1353.17 66.2092  43
   0  -6   0 1349.76 60.6891  42
   0  -6   0 1245.07 137.204  23
   0  -6   0 1296.97 65.5793  48
   0  -6  -1 6088.41 160.823  42
   0  -6  -1 5998.32 283.799   3
   0  -6  -1 5823.51 305.227  44
   0  -6  -1 6117.15 170.669  48
   0  -6  -1 5755.87 302.342  23
   0  -6  -1 5915.09 169.766  43
   0  -6  -2 54073.8 1071.04  48
   0  -6  -2 52512.3 1056.66  42
   0  -6  -2 56775.9 1339.09  44
   0  -6  -2 56905.8 1276.63   3
   0  -6  -2 57183.6 1140.99   1
   0  -6  -2 53609.5 1317.13  23
   0  -6  -2 52951.4 1070.53  43
   0  -6  -3 54007.2 1333.71  23
   0  -6  -3 59899.5 1368.34  44
   0  -6  -3 54945.0 1089.15  43
   0  -6  -3 55494.4 1076.54  42
   0  -6  -3 57367.4 1295.12   3
   0  -6  -3 58542.9 1185.68   1
   0  -6  -3 51438.6 1084.28  48
   0  -6  -4 6741.88 334.866  23
   0  -6  -4 6544.06 305.765   3
   0  -6  -4 7128.19 183.465  42
   0  -6  -4 7215.10 265.972   1
   0  -6  -4 6832.50 162.449   2
   0  -6  -4 7549.93 195.508  43
   0  -6  -4 6968.74 340.935  44
   0  -6  -4 7552.12 194.963  48
   0  -6  -5 893.696 53.3833  48
   0  -6  -5 851.418 89.4381   1
   0  -6  -5 846.467 102.967   3
   0  -6  -5 853.530 52.9027  43
   0  -6  -5 792.319 47.0517  42
   0  -6  -5 862.650 40.4179   2
   0  -6  -5 915.721 119.538  44
   0  -6  -5 823.496 115.355  23
   0  -6  -6 5866.69 144.408   2
   0  -6  -6 5710.81 162.678  48
   0  -6  -6 5474.69 161.050  38
   0  -6  -6 5253.66 161.303  19
   0  -6  -6 5717.44 282.384   3
   0  -6  -6 5293.36 168.050  41
   0  -6  -6 5667.20 156.378  42
   0  -6  -6 5680.87 257.571   1
   0  -6  -6 5438.69 298.714  44
   0  -6  -6 5704.72 163.804  43
   0  -6  -6 5379.28 170.277  22
   0  -6  -6 5668.28 156.285  34
   0  -6  -6 5429.89 296.220  23
   0  -6  -7 3822.74 218.024   1
   0  -6  -7 3574.55 120.440  43
   0  -6  -7 3549.28 219.448   3
   0  -6  -7 3288.81 121.825  39
   0  -6  -7 3516.85 120.768  38
   0  -6  -7 3616.59 115.053  42
   0  -6  -7 3517.43 118.764  48
   0  -6  -7 3264.79 229.676  23
   0  -6  -7 3570.63 118.459  34
   0  -6  -7 3369.79 230.316  44
   0  -6  -7 3663.72 107.219   2
   0  -6  -7 3430.46 128.332  41
   0  -6  -7 3531.07 129.955  22
   0  -6  -8 3310.81 114.017   5
   0  -6  -8 3271.85 110.560  21
   0  -6  -8 3282.38 117.934  38
   0  -6  -8 3492.78 111.907  42
   0  -6  -8 3268.54 115.676  43
   0  -6  -8 3330.29 126.700  41
   0  -6  -8 3632.52 224.274   1
   0  -6  -8 3341.13 128.204  22
   0  -6  -8 3239.76 209.097   3
   0  -6  -8 3053.68 218.512  23
   0  -6  -8 3225.71 226.462  44
   0  -6  -8 3527.52 108.235   2
   0  -6  -8 3349.86 115.108  48
   0  -6  -9 19973.1 471.851  41
   0  -6  -9 21902.9 445.870  42
   0  -6  -9 20275.8 443.877   2
   0  -6  -9 19775.0 654.451  23
   0  -6  -9 20123.7 458.392  38
   0  -6  -9 21330.8 631.223   3
   0  -6  -9 21121.7 661.494   1
   0  -6  -9 20611.1 475.104  22
   0  -6 -10 5239.21 175.142  22
   0   6  10 5454.75 161.504  13
   0  -6 -10 5576.00 152.718   9
   0  -6 -10 5163.97 175.371  41
   0  -6 -10 5294.64 303.831   1
   0  -6 -10 5648.34 160.256   2
   0  -6 -10 5226.73 165.856  38
   0  -6 -11 113.948 29.6531  38
   0  -6 -11 57.0067 18.2055  22
   0  -6 -11 92.1454 24.2068  41
   0   6  11 117.790 24.1392  13
   0  -6 -11 90.5918 25.1517   2
   0  -6 -11 129.325 63.8983   1
   0  -6 -11 95.3708 20.3424   9
   0  -6 -12 11889.7 312.864  41
   0  -6 -12 12243.7 291.716   9
   0  -6 -12 12790.3 530.268   1
   0   6  12 12485.0 304.654  13
   0  -6 -12 12713.0 311.645  38
   0  -6 -12 12481.7 315.445  22
   0  -6 -13 12579.2 309.191  38
   0  -6 -13 11652.6 288.217   9
   0  -6 -13 11679.3 522.276   1
   0  -6 -13 11973.5 298.858   2
   0  -6 -13 11867.6 304.433  41
   0   6  13 11484.1 297.881  13
   0  -6 -14 1477.54 80.6522   2
   0  -6 -14 1354.71 71.1333   9
   0   6  14 1479.45 79.0919  13
   0   6  14 1532.55 165.384  45
   0  -6 -14 1536.81 82.8559  38
   0  -6 -15 3857.75 138.432   2
   0  -6 -15 3976.87 129.794   9
   0  -6 -15 3930.86 138.750  38
   0   6  15 3785.79 135.251  13
   0  -6 -16 6157.03 182.670   2
   0  -6 -16 6042.69 179.643  38
   0   6  16 5866.06 176.370  13
   0  -6 -16 6184.54 171.697   9
   0   6  17 3628.61 122.182  13
   0  -6 -17 3675.64 121.490  38
   0  -6 -18 173.102 23.4735  38
   0   6  18 152.108 24.2975  13
   0   6  19 3197.33 94.3703  13
   0  -6 -19 3422.87 101.118  32
   0  -6 -19 3242.19 103.847  25
   0  -7  14 175.785 22.6400  29
   0  -7  14 153.917 24.5895  20
   0  -7  14 176.502 26.2531  39
   0  -7  14 127.729 25.5051  30
   0  -7  14 198.490 23.0304  34
   0  -7  13 6231.11 170.649  20
   0  -7  13 6004.24 162.079  29
   0  -7  13 5662.91 166.972  30
   0  -7  13 6037.60 162.307  34
   0  -7  13 6145.27 168.835  39
   0  -7  12 6444.93 187.217  30
   0  -7  12 6346.25 177.693  34
   0  -7  12 6495.53 187.321  20
   0  -7  12 6953.35 187.096  39
   0  -7  12 6625.88 177.775  29
   0  -7  11 384.741 42.1361  39
   0  -7  11 307.465 39.8814  30
   0  -7  11 395.706 37.6246  29
   0  -7  11 363.614 39.1651  34
   0  -7  11 338.328 41.0481  20
   0  -7  10 147.453 32.6951  34
   0  -7  10 126.137 32.5404  39
   0  -7  10 114.675 34.1350  30
   0  -7  10 92.8689 24.7203  29
   0  -7   9 6238.53 179.649  34
   0  -7   9 6109.04 170.009  33
   0  -7   9 6255.67 183.110  39
   0  -7   9 5998.76 182.447  12
   0  -7   9 5913.87 189.320  17
   0  -7   9 6646.20 176.145  29
   0  -7   9 6345.66 190.004  30
   0  -7   8 1612.68 79.6207  39
   0  -7   8 1581.13 81.9774  12
   0  -7   8 1793.63 82.1269  34
   0  -7   8 1704.82 74.4793  33
   0  -7   8 1647.57 84.3906  30
   0  -7   8 1607.21 86.1753  17
   0  -7   7 11738.8 300.362  12
   0  -7   7 11996.3 290.724  34
   0  -7   7 11839.9 285.783  36
   0  -7   7 12240.2 298.452  30
   0  -7   7 11647.3 302.105  17
   0  -7   7 11964.5 280.536  33
   0  -7   7 12344.5 294.522  39
   0  -7   6 20.3717 15.0167  29
   0  -7   6 15.4592 20.0253  30
   0  -7   6 43.8803 14.9393  33
   0  -7   6 5.11373 20.1397  39
   0  -7   6 33.1668 19.9094  34
   0  -7   6 79.6276 25.6085  12
   0  -7   6 8.61636 23.3493  17
   0  -7   6 35.7985 17.7232  36
   0  -7   5 17231.1 397.509  21
   0  -7   5 17583.8 379.003  29
   0  -7   5 17025.0 401.745   5
   0  -7   5 17605.4 621.567  23
   0  -7   5 17256.2 405.332  12
   0  -7   5 17968.1 392.840  42
   0  -7   5 17262.1 381.033  36
   0  -7   5 17379.1 392.633  39
   0  -7   5 18134.5 406.632  24
   0  -7   5 17847.9 393.506  30
   0  -7   5 17318.4 593.668   3
   0  -7   5 18144.0 404.253  17
   0  -7   5 17067.5 390.503  34
   0  -7   4 25.1263 20.2819  38
   0  -7   4 34.4869 56.6749  44
   0  -7   4 32.3762 14.8858  36
   0  -7   4 11.0043 14.9870  30
   0  -7   4-3.87908 17.5497  12
   0  -7   4 19.7695 37.7438   3
   0  -7   4 36.2959 17.5600  24
   0  -7   4 35.3316 19.2455  21
   0  -7   4-4.72119 20.5556  17
   0  -7   4 22.2160 18.2382  43
   0  -7   4 20.6990 16.9118  42
   0  -7   4 22.7436 17.6393  34
   0  -7   4 32.8817 20.8058  39
   0  -7   4 4.95925 44.3338  23
   0  -7   4 29.2261 16.1661   5
   0  -7   3 31558.1 640.761  30
   0  -7   3 31179.0 644.634  34
   0  -7   3 31050.5 663.495   5
   0  -7   3 30662.4 943.247  44
   0  -7   3 32068.4 648.791  39
   0  -7   3 30342.5 665.615  43
   0  -7   3 30233.8 650.808  38
   0  -7   3 32047.1 667.947  48
   0  -7   3 31615.9 671.709  10
   0  -7   3 30646.6 918.844  23
   0  -7   3 31700.7 652.325  42
   0  -7   3 30218.4 655.564  21
   0  -7   3 31270.6 648.151  20
   0  -7   3 32139.8 665.205  12
   0  -7   3 31865.8 667.451  24
   0  -7   3 30023.2 880.298   3
   0  -7   2 1825.54 83.1028  21
   0  -7   2 1890.81 78.2245  39
   0  -7   2 1719.55 84.1521   5
   0  -7   2 1922.16 82.1863  42
   0  -7   2 1926.48 79.1901  20
   0  -7   2 1788.73 71.5519  30
   0  -7   2 1879.79 83.4253  22
   0  -7   2 1937.27 87.6573  12
   0  -7   2 1729.13 185.425  44
   0  -7   2 1885.98 89.5077  48
   0  -7   2 1798.91 80.1841  41
   0  -7   2 1889.40 91.2830  10
   0  -7   2 1765.55 75.4917  34
   0  -7   2 1885.11 90.1238  43
   0  -7   2 2036.10 192.595  23
   0  -7   2 1985.03 178.092   3
   0  -7   2 1739.47 79.6170  38
   0  -7   2 1947.37 90.5400  24
   0  -7   1 24553.6 537.406  24
   0  -7   1 23751.8 777.705  23
   0  -7   1 24349.0 524.133  41
   0  -7   1 24579.0 802.179  44
   0  -7   1 24029.6 511.206  34
   0  -7   1 24138.5 534.597  48
   0  -7   1 24940.3 513.469  39
   0  -7   1 23287.2 516.722  42
   0  -7   1 24584.4 531.118  12
   0  -7   1 24103.7 527.672  22
   0  -7   1 24409.3 524.645  21
   0  -7   1 24155.2 740.153   3
   0  -7   1 24379.1 536.060  43
   0  -7   1 24229.0 540.436  10
   0  -7   1 23346.3 519.148  38
   0  -7   1 23941.9 528.018   5
   0  -7   1 25192.9 514.687  20
   0  -7   0 2446.04 96.6193  21
   0  -7   0 2485.52 107.533  10
   0  -7   0 2451.80 98.2181  41
   0  -7   0 2347.62 102.574  43
   0  -7   0 2253.76 210.934  44
   0  -7   0 2413.72 103.558  48
   0  -7   0 2498.75 91.2094  34
   0  -7   0 2444.61 104.657  24
   0  -7   0 2559.23 198.308   3
   0  -7   0 2532.60 96.6300  42
   0  -7   0 2449.14 101.512  12
   0  -7   0 2317.55 94.6761  38
   0  -7   0 2452.71 216.446  23
   0  -7   0 2491.23 89.7281  39
   0  -7   0 2367.93 99.7255  22
   0  -7   0 2484.15 100.879   5
   0  -7   0 2447.00 90.3137  20
   0  -7  -1 24385.7 538.438  43
   0  -7  -1 23874.4 523.319  38
   0  -7  -1 24635.4 514.784  20
   0  -7  -1 25017.9 745.382   3
   0  -7  -1 24041.5 527.840   5
   0  -7  -1 24702.5 525.589  21
   0  -7  -1 24242.4 514.275  34
   0  -7  -1 24036.1 520.583  42
   0  -7  -1 23620.3 787.813  23
   0  -7  -1 25598.8 512.236  39
   0  -7  -1 24937.9 537.130  12
   0  -7  -1 24136.1 536.183  22
   0  -7  -1 24076.8 530.266  41
   0  -7  -1 23946.1 536.794  48
   0  -7  -1 24222.3 539.427  24
   0  -7  -1 24365.9 802.047  44
   0  -7  -1 24357.5 544.827  10
   0  -7  -2 5909.44 150.901  39
   0  -7  -2 5448.23 150.396  34
   0  -7  -2 5162.59 156.136  21
   0  -7  -2 5263.30 148.619  20
   0  -7  -2 5377.27 329.291  44
   0  -7  -2 5296.90 324.629  23
   0  -7  -2 4829.57 162.019  12
   0  -7  -2 5147.35 159.201   5
   0  -7  -2 5381.38 293.688   3
   0  -7  -2 5343.89 168.240  48
   0  -7  -2 5099.35 162.797  41
   0  -7  -2 5031.57 169.593  10
   0  -7  -2 5234.09 167.554  22
   0  -7  -2 5221.12 157.392  38
   0  -7  -2 5176.98 148.625  32
   0  -7  -2 5200.65 167.513  43
   0  -7  -2 4996.60 167.163  24
   0  -7  -2 5286.15 155.889  42
   0  -7  -3 8230.33 213.993  21
   0  -7  -3 8387.79 227.286  43
   0  -7  -3 7689.87 202.107  32
   0  -7  -3 8542.19 423.195  44
   0  -7  -3 7876.25 200.963  39
   0  -7  -3 7623.88 363.128   3
   0  -7  -3 7876.85 226.051  24
   0  -7  -3 8227.37 217.230   5
   0  -7  -3 7656.77 211.948  38
   0  -7  -3 8062.52 227.064  22
   0  -7  -3 8443.47 205.037  34
   0  -7  -3 8164.26 225.002  48
   0  -7  -3 7767.29 401.495  23
   0  -7  -3 7769.76 227.993  10
   0  -7  -3 8001.55 222.862  41
   0  -7  -3 7450.39 219.729  12
   0  -7  -3 8642.56 209.041  19
   0  -7  -3 7691.44 205.099  18
   0  -7  -3 7621.91 208.438  42
   0  -7  -4 527.758 48.1245  22
   0  -7  -4 512.146 45.9471  41
   0  -7  -4 539.735 47.8259  48
   0  -7  -4 457.191 42.1554   5
   0  -7  -4 562.692 42.7142  21
   0  -7  -4 507.270 40.6456  19
   0  -7  -4 487.439 37.3333  34
   0  -7  -4 435.379 39.9075  42
   0  -7  -4 546.804 49.1941  24
   0  -7  -4 481.412 37.6705  32
   0  -7  -4 454.485 45.7633  43
   0  -7  -4 474.730 41.0135  38
   0  -7  -4 487.302 37.8554  39
   0  -7  -4 430.085 37.2506  18
   0  -7  -4 432.891 96.1265  23
   0  -7  -4 399.904 91.0757   3
   0  -7  -4 489.163 65.1977   1
   0  -7  -4 454.242 47.2074  10
   0  -7  -4 416.022 97.6223  44
   0  -7  -5 31688.2 657.476  42
   0  -7  -5 30456.5 679.021  22
   0  -7  -5 31074.0 954.248  44
   0  -7  -5 31833.0 651.808  32
   0  -7  -5 32052.9 658.719  21
   0  -7  -5 30260.6 674.918  24
   0  -7  -5 30134.8 668.551  48
   0  -7  -5 32374.4 665.278   5
   0  -7  -5 33177.8 665.688  38
   0  -7  -5 31775.8 800.271   1
   0  -7  -5 30669.5 680.361  10
   0  -7  -5 32230.6 649.576  34
   0  -7  -5 30953.1 676.062  41
   0  -7  -5 32321.5 651.473  18
   0  -7  -5 30204.9 669.632  43
   0  -7  -5 33059.4 660.488  19
   0  -7  -5 30709.0 654.733  39
   0  -7  -5 29496.2 936.570  23
   0  -7  -5 29842.7 881.147   3
   0  -7  -6 594.362 84.2621   1
   0  -7  -6 525.170 49.7151  10
   0  -7  -6 605.884 101.781   3
   0  -7  -6 518.080 46.2429  48
   0  -7  -6 442.755 98.0828  23
   0  -7  -6 623.948 47.7016  39
   0  -7  -6 513.857 44.4156  38
   0  -7  -6 469.711 104.977  44
   0  -7  -6 498.789 47.1235  24
   0  -7  -6 528.490 42.4565  21
   0  -7  -6 484.020 41.3201  42
   0  -7  -6 591.989 35.3562   2
   0  -7  -6 583.370 43.6673  32
   0  -7  -6 469.323 37.9623  34
   0  -7  -6 523.750 45.9595  19
   0  -7  -6 552.923 48.6112  43
   0  -7  -6 438.505 43.7055  41
   0  -7  -6 476.476 48.8464  22
   0  -7  -6 453.532 40.5950   5
   0  -7  -6 540.506 39.4271  18
   0  -7  -7 182.016 31.7006  10
   0  -7  -7 168.879 50.7184   1
   0  -7  -7 199.609 30.9484  38
   0  -7  -7 236.305 31.9138   5
   0  -7  -7 315.469 40.5942  22
   0  -7  -7 198.121 31.0312  24
   0  -7  -7 210.702 29.2332  34
   0  -7  -7 174.029 65.3160  23
   0  -7  -7 175.691 31.2949  41
   0  -7  -7 278.643 31.2300  21
   0  -7  -7 182.321 29.6890  39
   0  -7  -7 198.379 32.7650  43
   0  -7  -7 149.211 51.7870  44
   0  -7  -7 196.409 31.0110  48
   0  -7  -7 244.541 28.2040  18
   0  -7  -7 224.139 30.0868  42
   0  -7  -7 251.477 36.4562  19
   0  -7  -7 223.120 24.9374   2
   0  -7  -7 199.701 59.1554   3
   0  -7  -8 5368.65 183.493  22
   0  -7  -8 5151.72 171.482  24
   0  -7  -8 5401.80 170.131  48
   0  -7  -8 5457.80 150.526   2
   0  -7  -8 5413.05 168.964  38
   0  -7  -8 5262.32 159.706  21
   0  -7  -8 5372.38 165.256   5
   0  -7  -8 5633.13 292.219   1
   0  -7  -8 5805.37 309.664   3
   0  -7  -8 5509.67 155.485  18
   0  -7  -8 4976.50 321.220  44
   0  -7  -8 5113.77 322.913  23
   0  -7  -8 5485.57 160.318  42
   0  -7  -8 5330.96 180.181  41
   0  -7  -8 5139.55 168.680  43
   0  -7  -9 39266.5 785.246  21
   0  -7  -9 40295.5 1053.15   1
   0  -7  -9 38991.3 822.276  41
   0  -7  -9 37559.5 803.873  24
   0  -7  -9 37423.8 820.938  22
   0  -7  -9 35925.5 1075.25  23
   0  -7  -9 38071.2 799.896  38
   0  -7  -9 38825.4 777.841   2
   0  -7  -9 38219.2 789.881   5
   0  -7 -10 1581.16 164.237   1
   0  -7 -10 1686.00 86.1821  38
   0  -7 -10 1571.49 93.1795  41
   0  -7 -10 1668.64 95.7023  22
   0  -7 -10 1792.23 79.0537   2
   0  -7 -11 3763.24 138.003  38
   0  -7 -11 3569.77 143.797  41
   0  -7 -11 3515.27 144.189  22
   0  -7 -11 3731.97 264.730   1
   0  -7 -11 3797.86 128.206   2
   0  -7 -12 24861.2 576.280  41
   0  -7 -12 25683.6 568.048  38
   0  -7 -12 25590.5 830.745   1
   0  -7 -12 24497.7 576.484  22
   0  -7 -12 27122.6 557.266   2
   0  -7 -13 52237.1 1042.82   2
   0  -7 -13 51320.4 1052.78  38
   0  -7 -13 51084.7 1059.99  41
   0   7  13 54026.9 1038.21  13
   0   7  14 101.447 22.1745  13
   0  -7 -14 36.7079 23.7899   2
   0  -7 -14 52.6765 27.1407  38
   0  -7 -14 65.9078 21.5376  41
   0  -7 -15 252.200 35.5522   2
   0  -7 -15 256.299 38.1568  38
   0   7  15 257.633 30.3619  13
   0  -7 -16 4530.64 144.577  38
   0   7  16 4522.90 132.877  13
   0  -7 -17 7981.81 206.895  25
   0  -7 -17 7502.81 200.076  32
   0  -7 -17 7885.60 200.351  38
   0   7  17 7525.47 185.841  13
   0  -7 -18 556.078 38.6095  32
   0   7  18 531.100 29.5010  13
   0  -7 -18 497.369 39.3744  25
   0  -7 -18 474.322 32.7060  38
   0  -8  13 1783.61 65.7973  34
   0  -8  13 1874.47 70.2793  30
   0  -8  13 1758.44 62.6097  29
   0  -8  13 1788.99 71.9518  20
   0  -8  13 1808.93 68.6818  39
   0  -8  12 300.632 34.2797  20
   0  -8  12 345.105 29.1919  29
   0  -8  12 319.931 33.9982  39
   0  -8  12 293.803 32.7262  30
   0  -8  12 296.934 30.9264  34
   0  -8  11 5273.40 153.724  30
   0  -8  11 5285.48 150.586  34
   0  -8  11 4935.23 140.240  29
   0  -8  11 5046.87 155.716  20
   0  -8  11 5012.88 151.371  39
   0  -8  10 230.470 27.3058  18
   0  -8  10 246.702 35.2635  39
   0  -8  10 221.691 37.9099  20
   0  -8  10 194.772 26.9062  29
   0  -8  10 243.895 35.3586  30
   0  -8  10 214.057 33.1061  34
   0  -8   9 21576.4 465.351  29
   0  -8   9 21997.5 489.253  20
   0  -8   9 22887.8 488.675  30
   0  -8   9 22710.4 486.206  39
   0  -8   9 22209.7 481.067  34
   0  -8   8 16118.3 387.977  20
   0  -8   8 15759.3 387.118  12
   0  -8   8 16630.9 381.996  34
   0  -8   8 16296.0 389.957  17
   0  -8   8 16775.6 367.691  29
   0  -8   8 17144.7 387.918  30
   0  -8   8 17025.1 387.110  39
   0  -8   7 77.0634 20.1632  29
   0  -8   7 120.184 30.3071  12
   0  -8   7 129.582 35.3896  17
   0  -8   7 33.3373 25.2938  34
   0  -8   7 142.340 33.1379  20
   0  -8   7 108.260 25.8137  39
   0  -8   7 96.2926 28.9667  30
   0  -8   6 25246.0 548.940  34
   0  -8   6 24767.6 549.254  39
   0  -8   6 25393.4 556.910  17
   0  -8   6 25444.4 547.731  30
   0  -8   6 25975.0 556.980  20
   0  -8   6 24703.9 562.934  12
   0  -8   6 25643.8 530.061  29
   0  -8   5 689.972 114.489  23
   0  -8   5 686.189 56.2928  12
   0  -8   5 716.180 52.1929  21
   0  -8   5 721.168 56.2893  20
   0  -8   5 724.566 54.4194   5
   0  -8   5 691.551 54.0981  34
   0  -8   5 748.871 51.6581  30
   0  -8   5 723.444 56.6425  17
   0  -8   5 683.552 51.6214  39
   0  -8   5 786.867 59.4475  24
   0  -8   4 926.440 60.9853  34
   0  -8   4 925.044 62.1042  17
   0  -8   4 917.059 60.7106  20
   0  -8   4 896.709 57.7138  38
   0  -8   4 861.316 59.1075  21
   0  -8   4 913.881 63.5876  12
   0  -8   4 1000.53 143.464  23
   0  -8   4 875.887 61.9384   5
   0  -8   4 922.235 59.7172  39
   0  -8   4 916.510 55.3492  30
   0  -8   4 930.938 65.0997  24
   0  -8   3 48.2436 16.6077  38
   0  -8   3 64.6819 23.4541  39
   0  -8   3 189.526 78.5265  44
   0  -8   3 74.9517 19.6904  30
   0  -8   3 115.011 28.3024  42
   0  -8   3 117.214 27.1209  34
   0  -8   3 125.159 31.5371  12
   0  -8   3 117.108 55.0404   3
   0  -8   3 106.499 67.4654  23
   0  -8   3 89.0141 26.7830  20
   0  -8   3 83.6669 25.0397  17
   0  -8   3 92.0710 27.5872  21
   0  -8   3 107.688 27.4220   5
   0  -8   3 122.242 29.4783  24
   0  -8   2 20787.0 460.580  42
   0  -8   2 20119.3 437.141  30
   0  -8   2 19205.1 455.292  38
   0  -8   2 21031.9 483.757  43
   0  -8   2 19915.2 458.886  41
   0  -8   2 20675.2 465.174  21
   0  -8   2 20320.1 479.932  48
   0  -8   2 21155.6 452.057  39
   0  -8   2 19101.9 735.937  23
   0  -8   2 19974.3 468.856   5
   0  -8   2 20681.3 472.964  12
   0  -8   2 20134.4 451.281  34
   0  -8   2 20017.1 769.389  44
   0  -8   2 20196.5 477.347  24
   0  -8   2 21215.4 466.835  22
   0  -8   2 21106.6 455.649  20
   0  -8   2 20178.2 704.828   3
   0  -8   1 1236.32 83.2529  10
   0  -8   1 1389.36 75.6947  21
   0  -8   1 1217.77 75.5779   5
   0  -8   1 1358.78 68.0763  39
   0  -8   1 1281.25 157.970   3
   0  -8   1 1386.35 82.7281  24
   0  -8   1 1388.38 71.0253  34
   0  -8   1 1302.23 75.7182  22
   0  -8   1 1230.14 80.4183  48
   0  -8   1 1372.80 75.1737  42
   0  -8   1 1381.39 80.2068  12
   0  -8   1 1013.42 164.944  44
   0  -8   1 1317.91 73.8782  41
   0  -8   1 1401.19 182.521  23
   0  -8   1 1239.40 70.9002  38
   0  -8   1 1492.26 72.4201  20
   0  -8   1 1393.72 84.9994  43
   0  -8   0 3543.12 296.270  44
   0  -8   0 3039.99 127.139  24
   0  -8   0 2922.29 237.102   3
   0  -8   0 2735.41 124.641  43
   0  -8   0 2801.65 256.841  23
   0  -8   0 2929.02 102.157  32
   0  -8   0 3035.50 115.470  42
   0  -8   0 2945.07 107.838  20
   0  -8   0 2945.75 128.874  10
   0  -8   0 2905.14 115.085  21
   0  -8   0 2910.61 107.758  34
   0  -8   0 3102.55 106.161  39
   0  -8   0 2925.52 121.886  12
   0  -8   0 2754.79 111.166  38
   0  -8   0 2926.46 120.403  22
   0  -8   0 2853.75 118.545   5
   0  -8   0 2706.74 114.398  41
   0  -8   0 2771.51 123.905  48
   0  -8  -1 181.526 32.6050  21
   0  -8  -1 129.831 26.6222  20
   0  -8  -1 102.034 62.4238  23
   0  -8  -1 180.034 34.0082  22
   0  -8  -1 229.472 32.9105  34
   0  -8  -1 114.856 27.4098  41
   0  -8  -1 128.863 31.1869   5
   0  -8  -1 179.687 25.4836  32
   0  -8  -1 186.753 34.1917  42
   0  -8  -1 127.565 28.0852  24
   0  -8  -1 155.625 72.7026  44
   0  -8  -1 133.875 31.7103  12
   0  -8  -1 163.882 28.1636  38
   0  -8  -1 179.113 36.3893  43
   0  -8  -1 185.246 37.8496  10
   0  -8  -1 114.022 34.4524  48
   0  -8  -1 199.155 27.3497  39
   0  -8  -1 104.672 62.2118   3
   0  -8  -2 39413.4 864.108  43
   0  -8  -2 39779.8 858.348  12
   0  -8  -2 39347.1 864.188  48
   0  -8  -2 42929.9 830.365  32
   0  -8  -2 40283.9 844.886  21
   0  -8  -2 40329.6 851.529   5
   0  -8  -2 41552.5 866.085  22
   0  -8  -2 40553.3 1223.38  44
   0  -8  -2 42998.9 833.993  34
   0  -8  -2 38959.0 833.460  18
   0  -8  -2 40833.5 874.479  10
   0  -8  -2 41887.7 1223.69  23
   0  -8  -2 41771.1 846.784  42
   0  -8  -2 42228.8 846.959  38
   0  -8  -2 41220.9 858.263  41
   0  -8  -2 42439.2 1145.60   3
   0  -8  -2 40775.9 824.581  39
   0  -8  -2 42416.6 872.061  24
   0  -8  -3 1278.99 72.5373  42
   0  -8  -3 1198.63 62.2989  39
   0  -8  -3 1071.91 72.6754  41
   0  -8  -3 1071.49 155.969  23
   0  -8  -3 1208.94 62.8573  32
   0  -8  -3 1434.71 68.7353  34
   0  -8  -3 1127.73 78.0559  24
   0  -8  -3 1221.60 70.5507  38
   0  -8  -3 1260.39 68.3740  18
   0  -8  -3 1346.51 82.6737  48
   0  -8  -3 1282.42 157.914   3
   0  -8  -3 1295.47 72.6661  21
   0  -8  -3 1316.89 67.5379  19
   0  -8  -3 1162.37 77.9069  22
   0  -8  -3 1206.71 72.6165   5
   0  -8  -3 1389.30 190.319  44
   0  -8  -3 1126.59 79.1646  10
   0  -8  -3 1214.34 81.5352  43
   0  -8  -4 3261.13 112.082  34
   0  -8  -4 3341.04 137.357  22
   0  -8  -4 3031.87 118.844  21
   0  -8  -4 3262.28 116.560  19
   0  -8  -4 3151.48 132.925  43
   0  -8  -4 3292.40 115.873  18
   0  -8  -4 3014.15 133.547  10
   0  -8  -4 3160.87 132.371  48
   0  -8  -4 3193.43 124.435   5
   0  -8  -4 3096.42 119.540  42
   0  -8  -4 3182.20 112.672  39
   0  -8  -4 3119.57 110.510  32
   0  -8  -4 3152.78 281.461  44
   0  -8  -4 3194.99 130.892  41
   0  -8  -4 3053.89 246.947   3
   0  -8  -4 3159.41 120.471  38
   0  -8  -4 3152.00 279.404  23
   0  -8  -4 3058.86 131.646  24
   0  -8  -5 1599.33 91.7340  43
   0  -8  -5 1619.42 78.3184  39
   0  -8  -5 1634.61 82.3918  42
   0  -8  -5 1625.77 74.5382  34
   0  -8  -5 1494.75 78.7293  21
   0  -8  -5 1644.72 75.7180  32
   0  -8  -5 1565.29 191.340  23
   0  -8  -5 1595.48 91.9604  41
   0  -8  -5 1466.55 90.6520  10
   0  -8  -5 1669.38 84.1159  38
   0  -8  -5 1286.56 183.329  44
   0  -8  -5 1693.44 80.8293  19
   0  -8  -5 1626.39 77.8932  18
   0  -8  -5 1586.15 92.6398  22
   0  -8  -5 1497.75 88.0897  24
   0  -8  -5 1590.68 89.7830  48
   0  -8  -5 1597.92 83.9249   5
   0  -8  -6 28483.9 668.195  10
   0  -8  -6 29840.5 662.934  43
   0  -8  -6 30626.2 649.285  38
   0  -8  -6 29767.8 664.874  41
   0  -8  -6 28868.3 662.325  24
   0  -8  -6 31701.8 635.058  32
   0  -8  -6 29700.8 640.646  39
   0  -8  -6 30828.3 923.490   3
   0  -8  -6 30187.8 641.787  42
   0  -8  -6 30885.9 649.409   5
   0  -8  -6 27760.7 969.488  44
   0  -8  -6 29245.5 672.107  22
   0  -8  -6 29757.8 660.956  48
   0  -8  -6 27576.7 962.333  23
   0  -8  -6 29856.4 640.138  21
   0  -8  -6 30697.4 630.807  18
   0  -8  -6 30489.0 644.634  19
   0  -8  -6 30696.0 632.265  34
   0  -8  -7 29169.1 608.197  18
   0  -8  -7 27052.1 648.702  22
   0  -8  -7 26609.9 940.001  23
   0  -8  -7 29426.8 642.104  43
   0  -8  -7 29498.3 605.124  25
   0  -8  -7 29329.1 626.347   5
   0  -8  -7 29227.7 619.367  21
   0  -8  -7 29142.4 628.822  19
   0  -8  -7 29469.2 812.728   1
   0  -8  -7 28119.3 618.388  42
   0  -8  -7 28096.4 877.957   3
   0  -8  -7 30296.2 616.307  32
   0  -8  -7 28912.4 639.637  48
   0  -8  -7 28125.6 611.946  34
   0  -8  -7 28331.0 643.701  24
   0  -8  -7 29214.5 627.647  39
   0  -8  -7 28247.1 646.678  41
   0  -8  -7 29724.1 630.671  38
   0  -8  -7 28682.5 960.608  44
   0  -8  -8 1313.30 66.6953  18
   0  -8  -8 1332.88 72.4363  21
   0  -8  -8 1363.44 73.3192  42
   0  -8  -8 1400.53 63.6827   2
   0  -8  -8 1280.76 82.6123  24
   0  -8  -8 1337.31 86.9970  41
   0  -8  -8 1295.82 86.9995  22
   0  -8  -8 1404.94 76.6666   5
   0  -8  -8 995.831 137.279   3
   0  -8  -8 1467.22 75.2360  32
   0  -8  -8 1307.21 77.6935  38
   0  -8  -8 1292.17 172.156  23
   0  -8  -8 1392.53 145.714   1
   0  -8  -9 16.7147 28.4536  22
   0  -8  -9 20.6670 22.6225  32
   0  -8  -9 76.6900 25.2311   5
   0  -8  -9 75.2715 44.1520   1
   0  -8  -9 15.2698 25.9967  38
   0  -8  -9 31.5390 20.3303  24
   0  -8  -9 8.93061 22.5991  21
   0  -8  -9 74.2719 19.2827   2
   0  -8  -9 37.8202 27.4609  41
   0  -8 -10 4481.35 143.380   5
   0  -8 -10 4351.42 135.864   2
   0  -8 -10 4349.13 147.005  32
   0  -8 -10 4780.62 161.405  38
   0  -8 -10 4360.92 138.027  21
   0  -8 -10 4295.77 166.152  41
   0  -8 -10 4338.25 152.778  24
   0  -8 -11 10567.7 307.749  22
   0  -8 -11 10942.6 291.377  38
   0  -8 -11 10974.6 306.277  41
   0  -8 -11 11279.8 273.678   2
   0  -8 -11 11596.4 286.044  32
   0  -8 -12 2180.68 101.105  38
   0  -8 -12 1963.48 86.5438   2
   0  -8 -12 1916.24 102.883  22
   0  -8 -12 2069.88 105.389  41
   0  -8 -12 2118.91 97.0118  32
   0  -8 -13 1047.86 67.1285  32
   0  -8 -13 959.314 67.2368  41
   0  -8 -13 957.084 59.4533   2
   0   8  13 802.895 131.416  45
   0  -8 -13 992.068 68.0358  38
   0  -8 -14 20856.8 477.960  38
   0  -8 -14 20712.5 479.162  41
   0  -8 -15 2045.30 88.1124  25
   0  -8 -15 1998.54 88.2567  32
   0  -8 -15 2035.41 90.4853  38
   0  -8 -16 2129.02 87.0679  38
   0  -8 -16 2227.55 88.2230  25
   0  -8 -16 2207.73 87.7576  32
   0  -8 -17 31.0230 15.5708  38
   0  -8 -17 17.0267 18.1161  32
   0  -8 -17 30.1933 13.9157  26
   0  -8 -17-9.02804 16.8516  25
   0  -8 -18 334.576 24.2112  38
   0  -8 -18 424.063 30.7893  32
   0  -8 -18 440.470 31.0986  25
   0  -8 -18 366.669 24.0644  26
   0  -9  12 703.151 36.2921  39
   0  -9  12 687.944 35.8464  34
   0  -9  12 647.744 39.1898  20
   0  -9  12 690.967 37.2627  30
   0  -9  11 402.838 33.2911  34
   0  -9  11 443.833 37.1741  20
   0  -9  11 378.237 31.5764  30
   0  -9  11 409.320 32.4151  39
   0  -9  10 3036.43 103.286  34
   0  -9  10 3047.68 94.8712  18
   0  -9  10 3105.13 109.504  20
   0  -9  10 3279.11 105.747  30
   0  -9  10 3170.46 104.677  39
   0  -9   9 15710.7 350.277  30
   0  -9   9 15875.1 352.133  39
   0  -9   9 15107.6 344.665  18
   0  -9   9 15162.1 350.221  34
   0  -9   9 15410.7 358.627  20
   0  -9   8 78.6099 27.6566  34
   0  -9   8 86.4340 23.7888  12
   0  -9   8 71.0396 23.2051  18
   0  -9   8 88.1614 31.3259  20
   0  -9   8 81.1571 27.0204  39
   0  -9   8 96.8251 28.7113  30
   0  -9   7 89.1643 30.1169  17
   0  -9   7 59.9323 23.8982  30
   0  -9   7 114.355 32.3375  20
   0  -9   7 146.537 30.6050  12
   0  -9   7 97.9349 25.8660  39
   0  -9   7 189.852 36.0274  34
   0  -9   6 190.492 39.6337  17
   0  -9   6 149.841 35.4624  20
   0  -9   6 209.712 33.8924  39
   0  -9   6 175.359 33.9705  34
   0  -9   6 201.701 35.0439  12
   0  -9   6 241.247 34.2603  30
   0  -9   5 23590.4 503.157  21
   0  -9   5 22699.6 510.911  20
   0  -9   5 22520.6 494.272  30
   0  -9   5 21995.9 503.688  34
   0  -9   5 22877.5 518.593  24
   0  -9   5 22555.6 509.222  17
   0  -9   5 23710.5 505.295  39
   0  -9   5 23041.2 523.466  12
   0  -9   5 23227.7 508.449   5
   0  -9   4 495.923 44.5816  21
   0  -9   4 433.895 46.4099  34
   0  -9   4 494.284 49.5529  24
   0  -9   4 450.404 49.5100  17
   0  -9   4 492.381 49.7850  20
   0  -9   4 536.227 52.0331  12
   0  -9   4 582.721 44.7824  30
   0  -9   4 569.432 46.6697  39
   0  -9   4 462.134 40.5045  38
   0  -9   4 556.761 50.1560   5
   0  -9   3 711.682 61.7351  24
   0  -9   3 784.096 62.8019   5
   0  -9   3 688.890 55.8520  34
   0  -9   3 688.280 128.971  23
   0  -9   3 698.355 56.0311  17
   0  -9   3 780.560 62.6714  12
   0  -9   3 700.647 51.3822  39
   0  -9   3 699.378 55.7822  21
   0  -9   3 642.533 55.4399  20
   0  -9   3 606.440 48.5333  38
   0  -9   3 691.678 46.1312  30
   0  -9   2 274.435 38.7667  42
   0  -9   2 233.324 32.1102  41
   0  -9   2 266.624 96.7195  23
   0  -9   2 281.192 39.5907  17
   0  -9   2 166.494 34.8982  21
   0  -9   2 290.502 33.4834  39
   0  -9   2 252.272 34.5793  22
   0  -9   2 335.018 37.0576  38
   0  -9   2 239.591 39.1970  12
   0  -9   2 292.761 43.6737  24
   0  -9   2 171.099 38.9629   5
   0  -9   2 200.051 34.5246  34
   0  -9   2 222.833 82.5514   3
   0  -9   2 292.899 40.5565  20
   0  -9   1 22621.8 517.304  21
   0  -9   1 22087.2 520.851  22
   0  -9   1 23725.9 518.486  42
   0  -9   1 22511.6 537.475  24
   0  -9   1 22893.2 505.265  34
   0  -9   1 23738.3 505.466  17
   0  -9   1 22621.2 509.333  38
   0  -9   1 22972.8 795.662   3
   0  -9   1 23783.6 499.745  39
   0  -9   1 23320.6 530.329  12
   0  -9   1 23230.0 506.486  20
   0  -9   1 21639.5 513.458  41
   0  -9   1 22044.0 850.595  23
   0  -9   1 22420.0 523.857   5
   0  -9   0 204.240 45.9316  43
   0  -9   0 214.026 37.1793  34
   0  -9   0 252.378 102.536  44
   0  -9   0 225.489 36.4660  18
   0  -9   0 208.876 39.7150  42
   0  -9   0 156.167 37.7899  24
   0  -9   0 170.728 34.7460  21
   0  -9   0 216.045 39.0622  12
   0  -9   0 212.129 37.7670   5
   0  -9   0 189.966 33.2621  22
   0  -9   0 190.016 74.2436   3
   0  -9   0 164.756 32.4720  41
   0  -9   0 195.709 32.1632  38
   0  -9   0 285.466 101.816  23
   0  -9   0 182.004 29.0438  39
   0  -9   0 231.689 33.3782  20
   0  -9  -1 1508.52 85.4664  42
   0  -9  -1 1433.33 68.0454  32
   0  -9  -1 1374.46 86.7817  22
   0  -9  -1 1557.52 73.5948  39
   0  -9  -1 1447.89 79.1002  18
   0  -9  -1 1403.67 90.8187  24
   0  -9  -1 1484.76 79.5483  38
   0  -9  -1 1330.74 81.0998  21
   0  -9  -1 1318.96 190.688  23
   0  -9  -1 1547.94 97.1528  43
   0  -9  -1 1439.61 173.686   3
   0  -9  -1 1521.34 91.7891  12
   0  -9  -1 1466.40 75.6637  34
   0  -9  -1 1308.16 196.350  44
   0  -9  -1 1335.27 83.4688   5
   0  -9  -1 1323.74 82.3825  41
   0  -9  -1 1518.45 96.9557  48
   0  -9  -2 1077.70 58.6676  32
   0  -9  -2 1000.47 65.2825  18
   0  -9  -2 1034.31 73.4288   5
   0  -9  -2 834.232 73.4087  48
   0  -9  -2 929.389 165.279  23
   0  -9  -2 1053.72 67.8773  38
   0  -9  -2 990.817 74.8388  22
   0  -9  -2 972.331 67.9056  21
   0  -9  -2 930.623 146.438   3
   0  -9  -2 958.599 71.0120  42
   0  -9  -2 1107.70 76.3418  41
   0  -9  -2 855.557 75.7210  43
   0  -9  -2 1071.41 64.7647  34
   0  -9  -2 1058.28 60.2070  39
   0  -9  -2 987.756 174.291  44
   0  -9  -2 1063.88 64.9001  19
   0  -9  -2 1078.29 80.0874  24
   0  -9  -3 20992.8 530.905  48
   0  -9  -3 22877.6 500.618  19
   0  -9  -3 23399.1 512.591  38
   0  -9  -3 20978.5 533.297  43
   0  -9  -3 20819.9 843.929  23
   0  -9  -3 22896.3 535.078  22
   0  -9  -3 22176.5 535.943  24
   0  -9  -3 23351.0 504.365  18
   0  -9  -3 23455.5 516.757  21
   0  -9  -3 22760.6 490.855  32
   0  -9  -3 23088.9 529.133  41
   0  -9  -3 22458.9 520.935   5
   0  -9  -3 22781.8 493.523  39
   0  -9  -3 20737.1 505.835  42
   0  -9  -3 22200.8 789.280   3
   0  -9  -3 23253.7 892.933  44
   0  -9  -3 23423.6 498.155  34
   0  -9  -4 193.665 41.9003  24
   0  -9  -4 211.561 30.9447  39
   0  -9  -4 242.591 38.6739  21
   0  -9  -4 188.220 29.7739  32
   0  -9  -4 241.029 37.3766  18
   0  -9  -4 243.131 41.9484  22
   0  -9  -4 246.797 37.3031  19
   0  -9  -4 194.179 38.4985  42
   0  -9  -4 223.471 37.1747  38
   0  -9  -4 211.066 45.0368  48
   0  -9  -4 170.413 87.1530  44
   0  -9  -4 209.214 47.3374  43
   0  -9  -4-2.33953 61.1201  23
   0  -9  -4 250.922 42.0316  41
   0  -9  -4 226.306 35.0634  34
   0  -9  -4 188.074 83.6025   3
   0  -9  -4 292.984 43.9697   5
   0  -9  -5 334.576 40.9129  21
   0  -9  -5 355.787 46.2948  41
   0  -9  -5 380.966 39.8344  39
   0  -9  -5 391.769 45.2796  19
   0  -9  -5 302.331 35.4391  34
   0  -9  -5 313.214 44.9692   5
   0  -9  -5 292.771 34.9159  32
   0  -9  -5 334.138 47.8840  24
   0  -9  -5 388.941 45.1562  38
   0  -9  -5 345.900 49.9890  22
   0  -9  -5 272.933 96.5145  23
   0  -9  -5 305.248 97.5492   3
   0  -9  -5 312.788 44.4907  42
   0  -9  -5 376.840 52.5364  43
   0  -9  -5 339.476 38.4299  18
   0  -9  -5 326.355 100.797  44
   0  -9  -6 2835.08 117.377  19
   0  -9  -6 2758.25 135.693  22
   0  -9  -6 2912.87 109.065  18
   0  -9  -6 2748.86 129.768  41
   0  -9  -6 2654.42 107.216  34
   0  -9  -6 2786.67 112.746  39
   0  -9  -6 2779.88 106.360  32
   0  -9  -6 2444.09 227.706   3
   0  -9  -6 2640.56 116.923   5
   0  -9  -6 2835.29 116.313  21
   0  -9  -6 2730.50 270.391  23
   0  -9  -6 2947.48 120.370  38
   0  -9  -6 2662.33 113.873  42
   0  -9  -6 2536.23 124.089  24
   0  -9  -7 16397.2 399.253  39
   0  -9  -7 15628.0 702.615  23
   0  -9  -7 17359.0 394.806  34
   0  -9  -7 17558.6 410.190  38
   0  -9  -7 16072.6 423.613  41
   0  -9  -7 17569.9 439.902  22
   0  -9  -7 16506.4 422.609  24
   0  -9  -7 15983.9 384.636  18
   0  -9  -7 18085.2 396.038  32
   0  -9  -7 17313.4 407.390   5
   0  -9  -7 17361.6 401.012  21
   0  -9  -8 1312.24 85.0334  24
   0  -9  -8 1245.44 86.2920  41
   0  -9  -8 1185.54 179.067  23
   0  -9  -8 1261.09 90.9527  22
   0  -9  -8 1333.82 64.3403  25
   0  -9  -8 1285.58 75.3114   5
   0  -9  -8 1355.53 74.7172  21
   0  -9  -8 1347.51 68.9881  18
   0  -9  -8 1322.42 78.7241  38
   0  -9  -8 1395.72 74.1433  32
   0  -9  -9 22873.6 534.847  41
   0  -9  -9 22899.5 514.858  38
   0  -9  -9 22765.2 496.226  21
   0  -9  -9 23063.0 500.726  32
   0  -9  -9 21520.5 536.299  22
   0  -9  -9 22818.1 485.464  25
   0  -9  -9 22119.2 518.791  24
   0  -9  -9 21908.9 500.450   5
   0  -9 -10 1425.77 74.8564  32
   0  -9 -10 1305.84 70.8685   5
   0  -9 -10 1439.26 82.9884  38
   0  -9 -10 1267.19 87.6190  41
   0  -9 -10 1325.01 89.4882  22
   0  -9 -10 1290.61 66.9496  21
   0  -9 -10 1425.72 69.4922  25
   0  -9 -10 1302.57 76.9480  24
   0  -9 -11 570.449 59.0870  22
   0  -9 -11 588.002 44.7417  25
   0  -9 -11 646.268 57.9917  38
   0  -9 -11 553.489 50.9417  32
   0  -9 -11 594.054 58.7166  41
   0  -9 -12 3085.96 110.874  25
   0  -9 -12 3197.49 123.820  38
   0  -9 -12 3268.92 119.142  32
   0  -9 -12 3156.48 130.795  41
   0  -9 -13 24781.9 545.799  38
   0  -9 -13 25253.2 538.632  32
   0  -9 -13 24708.6 529.078  25
   0  -9 -13 25146.6 554.867  41
   0  -9 -14 39.8307 25.4258  38
   0  -9 -14 56.6563 29.1617  32
   0  -9 -14 11.8765 18.7846  25
   0  -9 -14 57.5454 22.5090  41
   0  -9 -15 77.1506 25.1704  32
   0  -9 -15 116.156 26.4606  38
   0  -9 -15 75.3607 22.0268  25
   0  -9 -15 54.3250 16.4592  41
   0  -9 -16 2828.30 91.0402  25
   0  -9 -16 2979.62 96.5234  32
   0  -9 -16 2681.60 94.4416  38
   0 -10  10 173.225 18.0633  30
   0 -10  10 172.683 18.0240  39
   0 -10  10 201.654 24.3440  20
   0 -10  10 178.140 20.7523  34
   0 -10   9 131.923 23.9959  20
   0 -10   9 172.349 21.0721  30
   0 -10   9 121.685 21.4528  34
   0 -10   9 188.659 21.7659  39
   0 -10   9 143.621 18.3625  18
   0 -10   8 613.617 45.6774  20
   0 -10   8 637.305 44.2416  34
   0 -10   8 597.050 40.6977  18
   0 -10   8 642.330 40.8030  39
   0 -10   8 566.561 37.2518  30
   0 -10   7 1428.38 68.2048  18
   0 -10   7 1419.45 71.9738  20
   0 -10   7 1425.63 61.5818  30
   0 -10   7 1494.05 66.8104  39
   0 -10   7 1388.85 69.7843  34
   0 -10   6 2962.21 99.2279  30
   0 -10   6 3090.63 112.993  17
   0 -10   6 3020.11 110.506  34
   0 -10   6 3255.95 107.440  39
   0 -10   6 2966.81 111.243  18
   0 -10   6 3164.94 115.355  20
   0 -10   5-2.82432 25.1259  18
   0 -10   5 3.73975 16.1735  21
   0 -10   5-4.59797 27.5848  20
   0 -10   5 77.6841 30.3454  34
   0 -10   5 4.26374 26.3637  17
   0 -10   5-22.1604 22.0365  39
   0 -10   5 67.6190 19.1244  30
   0 -10   5 8.59176 18.7600  24
   0 -10   4 4052.69 143.109  18
   0 -10   4 4200.78 142.337  20
   0 -10   4 4435.77 136.058  39
   0 -10   4 4185.35 140.207  34
   0 -10   4 4099.00 123.440  30
   0 -10   4 4259.57 137.706  21
   0 -10   4 4056.33 148.567  24
   0 -10   4 4016.99 140.379   5
   0 -10   4 4206.34 140.782  17
   0 -10   3 26.8886 23.1581   5
   0 -10   3 22.0858 28.3716  34
   0 -10   3 61.5415 31.4558  18
   0 -10   3 32.4887 23.0270  21
   0 -10   3 57.5869 27.8846  17
   0 -10   3 24.5999 27.6605  20
   0 -10   3 51.3639 23.9499  39
   0 -10   3 32.7143 19.0011  38
   0 -10   3-12.9677 25.2872  24
   0 -10   2 4639.93 159.718   5
   0 -10   2 4277.75 163.574  24
   0 -10   2 4472.93 140.994  39
   0 -10   2 4273.21 140.200  38
   0 -10   2 4446.38 151.731  21
   0 -10   2 4448.50 147.532  20
   0 -10   2 4321.90 152.494  18
   0 -10   2 4311.36 146.386  34
   0 -10   2 4462.06 146.949  17
   0 -10   1 175.936 36.0366   5
   0 -10   1 120.879 28.9128  17
   0 -10   1 141.200 29.6696  22
   0 -10   1 200.495 32.2631  41
   0 -10   1 195.564 73.6574  23
   0 -10   1 185.367 28.6949  39
   0 -10   1 161.821 35.0006  34
   0 -10   1 139.918 39.1778  24
   0 -10   1 131.689 27.1660  38
   0 -10   1 166.866 35.6998  18
   0 -10   1 125.786 34.6970  21
   0 -10   0 13576.5 348.852  41
   0 -10   0 13843.7 350.249  21
   0 -10   0 13502.4 656.181  23
   0 -10   0 14185.2 347.529  18
   0 -10   0 13890.8 356.752  22
   0 -10   0 14268.6 374.332  24
   0 -10   0 14601.1 341.039  34
   0 -10   0 14488.0 342.472  19
   0 -10   0 14108.6 332.337  17
   0 -10   0 13754.5 339.059  38
   0 -10   0 13948.0 358.463   5
   0 -10   0 14213.4 331.330  39
   0 -10  -1 3482.95 122.166  39
   0 -10  -1 3625.55 153.559  24
   0 -10  -1 3465.16 141.521   5
   0 -10  -1 3665.46 129.720  34
   0 -10  -1 3514.28 130.071  38
   0 -10  -1 3547.95 129.955  19
   0 -10  -1 3429.74 142.498  22
   0 -10  -1 3544.58 138.829  21
   0 -10  -1 3482.23 138.971  41
   0 -10  -1 3590.89 122.436  17
   0 -10  -1 3728.39 136.415  18
   0 -10  -1 3789.89 327.438  23
   0 -10  -2 1191.36 71.9444  19
   0 -10  -2 941.276 73.8301   5
   0 -10  -2 1137.08 187.278  23
   0 -10  -2 1121.01 80.3582  22
   0 -10  -2 1031.35 61.8650  39
   0 -10  -2 1143.78 58.6790  32
   0 -10  -2 1088.02 82.4061  24
   0 -10  -2 1117.30 77.7537  41
   0 -10  -2 1092.20 61.6332  17
   0 -10  -2 1204.61 71.8224  38
   0 -10  -2 1119.79 75.2213  21
   0 -10  -2 1085.96 71.2071  18
   0 -10  -2 1231.95 70.3622  34
   0 -10  -3 303.590 42.1305  19
   0 -10  -3 351.318 52.7819  24
   0 -10  -3 339.211 42.9825  18
   0 -10  -3 243.568 43.6282  21
   0 -10  -3 352.022 51.6837  22
   0  10   3 156.193 77.0401  45
   0 -10  -3 332.131 34.3473  32
   0 -10  -3 316.554 42.1073  38
   0 -10  -3 294.261 94.5955  23
   0 -10  -3 304.178 38.0674  34
   0 -10  -3 361.861 40.1270  39
   0 -10  -3 288.256 47.8544   5
   0 -10  -3 283.022 45.5708  41
   0 -10  -4 14244.3 370.634  22
   0 -10  -4 13272.0 365.157  24
   0 -10  -4 13570.8 320.328  32
   0 -10  -4 13322.5 357.485  41
   0 -10  -4 14385.6 357.874   5
   0 -10  -4 13718.0 330.914  39
   0 -10  -4 13547.6 337.651  19
   0 -10  -4 13846.1 333.961  18
   0 -10  -4 13980.5 331.583  34
   0 -10  -4 13572.3 341.318  38
   0 -10  -4 13824.7 347.265  21
   0 -10  -4 13285.2 650.273  23
   0 -10  -5 120.632 38.5553  22
   0 -10  -5 147.518 32.1287  34
   0 -10  -5 135.172 34.3840  38
   0 -10  -5 143.597 38.3718  21
   0 -10  -5 182.356 33.1006  39
   0 -10  -5 152.466 33.4148  18
   0 -10  -5 119.851 33.4891   5
   0 -10  -5 134.679 35.0332  19
   0 -10  -5 124.260 25.4049  32
   0 -10  -5 131.154 40.0932  24
   0 -10  -5 140.988 38.6956  41
   0 -10  -5 173.248 71.8361  23
   0 -10  -6 2453.33 109.161  38
   0 -10  -6 2440.32 111.880   5
   0 -10  -6 2407.49 107.775  21
   0 -10  -6 2452.43 101.061  18
   0 -10  -6 2370.17 107.881  19
   0 -10  -6 2381.20 118.962  41
   0 -10  -6 2372.19 103.129  39
   0 -10  -6 2617.66 99.9028  32
   0 -10  -6 2216.87 250.966  23
   0 -10  -6 2449.74 102.705  34
   0 -10  -6 2468.23 127.528  22
   0 -10  -6 2536.03 122.441  24
   0 -10  -7 1167.77 86.3964  22
   0 -10  -7 1149.41 74.5384   5
   0 -10  -7 1109.12 67.0794  34
   0 -10  -7 1186.88 75.3585  38
   0 -10  -7 1183.11 65.1358  32
   0 -10  -7 1108.57 64.2534  18
   0 -10  -7 1185.49 85.5309  41
   0 -10  -7 1128.52 69.9637  21
   0 -10  -7 1133.00 80.0413  24
   0 -10  -8 1860.18 100.204  24
   0 -10  -8 1994.12 112.198  22
   0 -10  -8 1815.22 86.6407  21
   0 -10  -8 1856.56 104.150  41
   0 -10  -8 2153.78 100.521  38
   0 -10  -8 1787.49 89.0282   5
   0 -10  -8 1833.89 84.0282  32
   0 -10  -9 1128.03 64.1239  21
   0 -10  -9 1230.79 76.5275  38
   0 -10  -9 1173.42 74.4102  24
   0 -10  -9 1123.50 82.6676  22
   0 -10  -9 992.433 63.5059   5
   0 -10  -9 1187.51 82.6489  41
   0 -10  -9 1171.18 65.8643  32
   0 -10 -10 11478.9 316.697  22
   0 -10 -10 11503.2 284.993  32
   0 -10 -10 11938.6 314.636  41
   0 -10 -10 11563.7 294.039  24
   0 -10 -10 11740.5 267.800  25
   0 -10 -10 12270.7 302.554  38
   0 -10 -10 11454.6 276.807  21
   0 -10 -11 4016.57 139.690  38
   0 -10 -11 3940.30 147.049  41
   0 -10 -11 3941.87 129.806  32
   0 -10 -11 3919.42 148.801  22
   0 -10 -11 3782.38 115.474  25
   0 -10 -12 162.583 33.4655  41
   0 -10 -12 199.441 23.6654  25
   0 -10 -12 180.261 33.0777  38
   0 -10 -12 207.184 33.1404  32
   0 -10 -13 343.782 35.4884  32
   0 -10 -13 291.559 27.3333  25
   0 -10 -13 331.959 37.3768  41
   0 -10 -13 253.328 33.8558  38
   0 -10 -14 8480.19 201.243  25
   0 -10 -14 8639.45 218.564  38
   0 -10 -14 8459.69 216.653  41
   0 -10 -15 826.286 45.9296  38
   0 -10 -15 826.818 44.3896  32
   0 -10 -15 796.458 37.7600  25
   0 -10 -15 766.282 38.8088  41
   0 -11   7 3036.56 92.1650  18
   0 -11   7 3111.66 94.5490  34
   0 -11   7 2984.23 87.3038  39
   0 -11   6 1382.49 61.2489  18
   0 -11   6 1418.59 62.0094  34
   0 -11   6 1268.19 54.3222  39
   0 -11   5 613.669 38.2841  39
   0 -11   5 553.235 42.1291  18
   0 -11   5 600.550 43.1164  34
   0 -11   4 81.4841 24.7449  19
   0 -11   4 34.5681 16.2476  39
   0 -11   4 101.480 27.4323  34
   0 -11   4 59.3614 20.9303  24
   0 -11   4 73.1051 23.9310  17
   0 -11   4 82.2754 26.6774  18
   0 -11   3 7104.86 190.619  34
   0 -11   3 7084.61 190.557  21
   0 -11   3 7182.17 197.073  18
   0 -11   3 6990.58 189.037  17
   0 -11   3 7165.22 183.956  39
   0 -11   3 7234.16 193.519  19
   0 -11   3 6736.26 200.376  24
   0 -11   2 199.342 34.5827  34
   0 -11   2 261.945 38.8444  18
   0 -11   2 169.389 31.4183  21
   0 -11   2 205.427 34.7846  24
   0 -11   2 191.444 32.9361   5
   0 -11   2 216.421 30.6456  17
   0 -11   2 233.653 35.8734  19
   0 -11   2 175.924 26.3326  39
   0 -11   1 20075.0 446.956  21
   0 -11   1 19123.4 444.212  18
   0 -11   1 18641.0 430.025  17
   0 -11   1 20658.9 441.028  34
   0 -11   1 19766.8 453.046   5
   0 -11   1 20174.8 431.844  39
   0 -11   1 19373.1 427.381  38
   0 -11   1 20008.7 466.871  24
   0 -11   1 21023.9 444.843  19
   0 -11   0 2248.07 98.9502  18
   0 -11   0 2154.19 93.1489  41
   0 -11   0 2108.53 107.038  24
   0 -11   0 2217.07 88.2740  39
   0 -11   0 2146.42 92.4159  34
   0 -11   0 2096.93 86.3528  38
   0 -11   0 2112.48 102.007   5
   0 -11   0 2206.95 87.2868  17
   0 -11   0 2066.45 94.4997  22
   0 -11   0 2412.78 98.1288  19
   0 -11   0 2126.72 97.5649  21
   0 -11  -1 951.324 61.0577  34
   0 -11  -1 928.005 62.9287  18
   0 -11  -1 883.953 63.5219  21
   0 -11  -1 906.572 64.7581  22
   0 -11  -1 912.364 55.3109  39
   0 -11  -1 880.251 52.2996  17
   0 -11  -1 837.486 70.4362  24
   0 -11  -1 858.224 55.3784  38
   0 -11  -1 897.453 66.6558   5
   0 -11  -1 814.224 58.5738  19
   0 -11  -1 851.201 60.6425  41
   0 -11  -2 1049.24 55.6836  17
   0 -11  -2 1010.07 61.5398  38
   0 -11  -2 998.275 75.4799  24
   0 -11  -2 1020.26 68.2023  41
   0 -11  -2 1129.59 66.9126  34
   0 -11  -2 1036.10 67.0507  18
   0 -11  -2 1013.25 73.1211   5
   0 -11  -2 1107.07 61.9437  39
   0 -11  -2 1064.90 72.6059  21
   0 -11  -2 1084.04 72.9420  22
   0 -11  -2 1059.88 67.1029  19
   0 -11  -3 9200.41 252.397  21
   0 -11  -3 9661.64 261.901   5
   0 -11  -3 9400.89 239.828  34
   0 -11  -3 9290.94 264.191  22
   0 -11  -3 9087.43 242.224  38
   0 -11  -3 9158.15 223.957  17
   0 -11  -3 8731.63 233.683  39
   0 -11  -3 10031.0 251.714  19
   0 -11  -3 9280.07 242.740  18
   0 -11  -3 8988.42 255.009  41
   0 -11  -3 9206.07 269.244  24
   0 -11  -4 449.766 42.0696  39
   0 -11  -4 484.764 51.8298  21
   0 -11  -4 449.704 56.6522  24
   0 -11  -4 426.723 43.7104  34
   0 -11  -4 530.582 55.4852   5
   0 -11  -4 508.454 53.8102  41
   0 -11  -4 492.083 45.5069  18
   0 -11  -4 458.783 53.2743  22
   0 -11  -4 507.386 51.1975  19
   0 -11  -4 500.165 37.6946  32
   0 -11  -4 445.718 44.9737  38
   0 -11  -5 404.798 36.5915  32
   0 -11  -5 392.527 43.2713  38
   0 -11  -5 418.850 48.3387  21
   0 -11  -5 444.209 52.9870  22
   0 -11  -5 415.356 49.1459   5
   0 -11  -5 429.444 42.6987  34
   0 -11  -5 403.430 41.4912  18
   0 -11  -5 418.448 50.1914  41
   0 -11  -5 442.812 41.4098  39
   0 -11  -5 350.193 48.7594  24
   0 -11  -5 446.878 49.4363  19
   0 -11  -6 9.73875 26.9851  38
   0 -11  -6 60.6729 18.9702  32
   0 -11  -6 44.6339 29.8111   5
   0 -11  -6 39.3099 32.4990  22
   0 -11  -6 44.4283 23.4954  18
   0 -11  -6 13.3747 30.2797  41
   0 -11  -6 96.1342 29.6960  34
   0 -11  -6 52.9059 26.2930  21
   0 -11  -6 73.2888 34.4903  24
   0 -11  -7 10505.0 287.401  22
   0 -11  -7 9733.00 274.066  24
   0 -11  -7 9762.72 256.223  21
   0 -11  -7 10301.7 263.600  38
   0 -11  -7 10149.0 245.316  32
   0 -11  -7 10621.9 281.081  41
   0 -11  -7 9946.66 263.566   5
   0 -11  -8 2242.19 110.932  22
   0 -11  -8 2172.31 89.9242  21
   0 -11  -8 2346.16 108.003  41
   0 -11  -8 2245.04 86.6140  32
   0 -11  -8 2065.80 91.4800   5
   0 -11  -8 2159.00 100.790  24
   0 -11  -8 2309.08 99.4836  38
   0 -11  -9 139.685 25.5177  21
   0 -11  -9 177.812 30.1701  24
   0 -11  -9 149.474 25.4632  32
   0 -11  -9 165.293 34.6320  38
   0 -11  -9 161.522 38.1624  41
   0 -11  -9 137.758 33.6975  22
   0 -11 -10 17.2636 17.8170  24
   0 -11 -10 7.26464 16.4713  32
   0 -11 -10 20.7503 25.3765  38
   0 -11 -10 32.5949 25.5804  41
   0 -11 -11 1063.07 53.7937  32
   0 -11 -11 966.296 61.8853  41
   0 -11 -11 1052.65 60.3562  38
   0 -11 -12 437.598 37.5965  38
   0 -11 -12 407.274 32.4568  32
   0 -11 -12 416.583 38.2871  41
   0 -11 -13 1036.28 48.0878  32
   0 -11 -13 1004.67 52.4260  38
   0 -11 -13 1012.78 52.5206  41
   0 -12   4 2176.31 75.7419  34
   0 -12   4 2230.78 76.9181  18
   0 -12   4 2403.77 78.8841  19
   0 -12   3 589.171 38.5122  19
   0 -12   3 599.347 39.6160  18
   0 -12   3 580.811 37.5482  34
   0 -12   2 912.207 52.0481  24
   0 -12   2 887.442 43.3388  39
   0 -12   2 984.572 51.8798  19
   0 -12   2 937.651 50.3953  34
   0 -12   2 999.285 52.7373  18
   0 -12   1 360.601 34.3491  21
   0 -12   1 384.071 30.1836  39
   0 -12   1 362.599 36.1842  18
   0 -12   1 384.906 39.1994  24
   0 -12   1 392.018 36.5269  19
   0 -12   1 403.818 35.4855  34
   0 -12   1 406.864 32.0282  17
   0 -12   0 500.174 42.1300  19
   0 -12   0 461.978 40.1175  21
   0 -12   0 504.597 46.2630  24
   0 -12   0 482.034 39.4995  34
   0 -12   0 485.877 35.4170  39
   0 -12   0 557.472 44.6211  18
   0 -12   0 441.388 31.5273  17
   0 -12  -1 889.337 54.4699  19
   0 -12  -1 832.416 42.8285  17
   0 -12  -1 870.619 46.8326  39
   0 -12  -1 869.165 54.9611  21
   0 -12  -1 885.615 60.7269  24
   0 -12  -1 849.555 45.3005  38
   0 -12  -1 837.721 52.5662  18
   0 -12  -1 876.968 52.0310  34
   0 -12  -2 8647.28 222.792  41
   0 -12  -2 9379.32 245.091  24
   0 -12  -2 8644.34 222.163  18
   0 -12  -2 9438.78 230.025  19
   0 -12  -2 9089.02 216.597  38
   0 -12  -2 8524.70 226.606  21
   0 -12  -2 9165.47 222.967  34
   0 -12  -2 8454.93 213.756  39
   0 -12  -3 1496.18 80.6403  24
   0 -12  -3 1363.54 66.5940  18
   0 -12  -3 1408.83 70.3697  41
   0 -12  -3 1408.38 64.0573  38
   0 -12  -3 1403.80 71.3412  19
   0 -12  -3 1317.72 61.0449  39
   0 -12  -3 1309.99 69.3614  21
   0 -12  -3 1333.47 73.2514   5
   0 -12  -3 1444.05 67.3944  34
   0 -12  -4 1911.78 91.9151  24
   0 -12  -4 1844.96 79.3748  34
   0 -12  -4 1979.18 86.9732  41
   0 -12  -4 2053.99 81.4778  38
   0 -12  -4 2067.44 90.9065   5
   0 -12  -4 2047.46 87.6241  21
   0 -12  -4 1914.79 79.8406  18
   0 -12  -5 757.732 47.1681  18
   0 -12  -5 752.004 57.2741  24
   0 -12  -5 790.588 52.4378  21
   0 -12  -5 701.402 51.9998  41
   0 -12  -5 814.408 50.6890  38
   0 -12  -6 1128.12 61.6867  21
   0 -12  -6 1226.17 61.8702  38
   0 -12  -6 986.387 64.1050  24
   0 -12  -6 1201.21 67.4596  41
   0 -12  -7 474.568 39.6637  21
   0 -12  -7 526.877 41.7929  38
   0 -12  -7 546.023 45.1188  24
   0 -12  -7 527.138 45.3212  41
   0 -12  -8 3173.86 109.552  24
   0 -12  -8 3385.41 108.591  38
   0 -12  -8 3303.02 116.023  41
   0 -12  -8 2998.57 99.8138  21
   0 -12  -9 1153.98 60.9658  41
   0 -12  -9 1000.88 52.9149  24
   0 -12  -9 1123.73 56.4995  38
   0 -12  -9 1112.71 47.1339  32
   0 -12 -10 1891.00 63.5424  32
   0 -12 -10 1820.74 77.2963  41
   0 -12 -10 2013.53 75.8278  38
   0 -12 -11 7568.96 175.696  32
   0 -12 -11 8170.33 191.011  38
   0 -12 -11 7837.63 194.418  41
   0 -13  -2 466.825 35.6755  24
   0 -13  -2 425.472 30.8045  18
   0 -13  -2 396.415 28.8606  34
   0 -13  -3 5481.45 151.046  24
   0 -13  -4 403.608 34.5986  24
   0 -13  -5 364.206 32.5513  24
   0 -13  -5 429.955 27.5941  38
   1 -12 -10 1835.82 63.2611  32
   1 -12 -10 1907.54 72.1400  38
   1 -12 -10 1807.01 73.8974  41
   1 -12  -9 11699.3 266.025  38
   1 -12  -9 11141.5 271.299  41
   1 -12  -9 11392.4 251.949  32
   1 -12  -8 3231.04 113.061  41
   1 -12  -8 3072.88 97.5222  21
   1 -12  -8 3304.91 107.553  38
   1 -12  -8 3129.21 94.4565  32
   1 -12  -7 1784.40 81.4929  24
   1 -12  -7 1977.18 86.6454  41
   1 -12  -7 1859.88 68.0415  32
   1 -12  -7 1945.34 75.7729  21
   1 -12  -7 2022.29 81.2178  38
   1 -12  -6 3336.38 118.840  41
   1 -12  -6 3242.61 113.077   5
   1 -12  -6 3339.56 111.159  38
   1 -12  -6 3084.57 95.4331  32
   1 -12  -6 3180.15 108.080  21
   1 -12  -6 3075.47 117.834  24
   1 -12  -5 5.26563 22.1532  41
   1 -12  -5 9.34075 15.7228  18
   1 -12  -5-11.3277 23.0053   5
   1 -12  -5 21.2738 12.4532  32
   1 -12  -5-0.31862 22.4004  21
   1 -12  -5 28.2874 23.1790  24
   1 -12  -5 8.91696 18.9654  38
   1 -12  -4 9422.09 233.799  38
   1 -12  -4 9506.39 238.208  21
   1 -12  -4 9679.80 245.256   5
   1 -12  -4 9355.56 225.746  18
   1 -12  -4 9129.62 226.642  34
   1 -12  -4 8900.98 247.284  24
   1 -12  -4 9689.67 245.371  41
   1 -12  -3 1415.93 79.4085  24
   1 -12  -3 1666.74 70.6736  34
   1 -12  -3 1561.01 69.3297  18
   1 -12  -3 1567.43 75.0765  21
   1 -12  -3 1639.75 76.5796  41
   1 -12  -3 1459.55 77.1333   5
   1 -12  -3 1665.75 73.1136  38
   1 -12  -2 6241.18 188.471  24
   1 -12  -2 6127.01 167.000  18
   1 -12  -2 6079.97 166.166  38
   1 -12  -2 6012.29 173.667  21
   1 -12  -2 5878.96 152.646  17
   1 -12  -2 6670.63 174.969  19
   1 -12  -2 6021.55 178.628   5
   1 -12  -2 6422.81 167.571  34
   1 -12  -1 1492.69 72.0662  21
   1 -12  -1 1516.02 69.4312  18
   1 -12  -1 1585.05 68.6832  34
   1 -12  -1 1523.05 65.9538  38
   1 -12  -1 1585.29 72.2291  19
   1 -12  -1 1550.58 81.2440  24
   1 -12  -1 1581.82 76.9774   5
   1 -12  -1 1492.46 60.7948  17
   1 -12   0 3605.94 111.532  34
   1 -12   0 3283.97 102.755  17
   1 -12   0 3509.98 114.019  18
   1 -12   0 3835.79 117.351  19
   1 -12   0 3394.20 119.125   5
   1 -12   0 3490.44 125.613  24
   1 -12   0 3515.33 115.984  21
   1 -12   0 3573.76 107.146  38
   1 -12   1 5780.58 155.506  19
   1 -12   1 5688.29 166.003  24
   1 -12   1 5905.53 153.327  34
   1 -12   1 5466.99 154.970  21
   1 -12   1 5542.16 155.304  18
   1 -12   1 5390.36 145.824  17
   1 -12   2 1869.25 72.3636  19
   1 -12   2 1867.94 74.2740  18
   1 -12   2 1785.35 68.1045  17
   1 -12   2 1831.79 72.0612  21
   1 -12   2 1777.45 70.6089  34
   1 -12   3 1363.78 56.5290  17
   1 -12   3 1304.56 56.5896  19
   1 -12   3 1313.21 56.8291  34
   1 -12   3 1242.95 58.1810  18
   1 -12   4 3269.66 97.7024  34
   1 -12   4 3333.23 97.0340  19
   1 -12   4 3315.15 99.9801  18
   1 -11 -13 1959.17 68.4424  32
   1 -11 -13 1818.29 68.7601  41
   1 -11 -13 1882.58 70.8451  38
   1 -11 -12 686.844 41.1271  32
   1 -11 -12 680.294 45.2506  38
   1 -11 -12 641.276 44.2586  41
   1 -11 -11 149.887 28.5594  41
   1 -11 -11 214.233 28.0618  32
   1 -11 -11 193.335 31.1437  38
   1 -11 -10 3491.18 112.273  32
   1 -11 -10 3451.42 120.832  38
   1 -11 -10 3433.59 126.687  41
   1 -11  -9 6685.02 177.189  21
   1 -11  -9 6916.09 182.402  32
   1 -11  -9 7186.00 196.052  38
   1 -11  -9 6672.05 201.666  41
   1 -11  -9 6513.95 180.682   5
   1 -11  -9 6667.56 189.533  24
   1 -11  -8 238.328 31.5887   5
   1 -11  -8 229.826 35.3420  24
   1 -11  -8 208.175 29.5832  21
   1 -11  -8 257.080 37.5930  38
   1 -11  -8 264.408 42.1774  41
   1 -11  -8 231.210 30.3772  32
   1 -11  -7 207.460 33.3610  21
   1 -11  -7 174.591 38.0757  38
   1 -11  -7 183.148 45.0959  41
   1 -11  -7 177.702 28.7162  32
   1 -11  -7 176.335 33.5021   5
   1 -11  -7 219.603 38.2970  24
   1 -11  -6 2141.09 98.9346  38
   1 -11  -6 2052.22 84.1099  18
   1 -11  -6 2116.57 98.0880   5
   1 -11  -6 2253.47 108.430  41
   1 -11  -6 2164.75 86.8851  32
   1 -11  -6 2113.70 95.3241  21
   1 -11  -6 2019.67 102.972  24
   1 -11  -5 6706.45 208.454  41
   1 -11  -5 6313.01 198.253   5
   1 -11  -5 6599.29 182.324  18
   1 -11  -5 6472.73 177.881  32
   1 -11  -5 6767.48 213.851  22
   1 -11  -5 6787.56 196.323  21
   1 -11  -5 6350.10 181.738  34
   1 -11  -5 6397.74 210.709  24
   1 -11  -5 6429.50 194.329  38
   1 -11  -4 3539.60 110.437  17
   1 -11  -4 3436.19 141.612  22
   1 -11  -4 3472.00 146.322  24
   1 -11  -4 3431.98 120.715  18
   1 -11  -4 3601.70 130.916  19
   1 -11  -4 3558.01 133.777  21
   1 -11  -4 3468.16 130.236  38
   1 -11  -4 3869.64 144.950  41
   1 -11  -4 3636.89 123.091  34
   1 -11  -4 3658.27 140.674   5
   1 -11  -4 3645.47 118.066  32
   1 -11  -3 25.5750 29.6495  19
   1 -11  -3 57.6024 34.9818  21
   1 -11  -3-21.6917 28.9769  41
   1 -11  -3 8.87914 26.5224  22
   1 -11  -3 17.2208 16.7746  17
   1 -11  -3-3.99277 18.2719  32
   1 -11  -3 25.9454 16.6593  39
   1 -11  -3 17.9200 36.4571   5
   1 -11  -3 27.9089 28.7884  38
   1 -11  -3 27.5283 36.8555  24
   1 -11  -3 3.03484 25.6201  18
   1 -11  -3 14.8115 24.4616  34
   1 -11  -2 897.410 61.8808  38
   1 -11  -2 851.688 64.8140  41
   1 -11  -2 943.756 54.0874  17
   1 -11  -2 955.884 77.9699  24
   1 -11  -2 904.286 50.7543  32
   1 -11  -2 905.607 58.6218  34
   1 -11  -2 964.077 54.3532  39
   1 -11  -2 915.237 62.1885  19
   1 -11  -2 914.372 66.6147  21
   1 -11  -2 844.922 68.5605   5
   1 -11  -2 854.976 58.5513  18
   1 -11  -1 19154.0 412.813  32
   1 -11  -1 19426.9 438.544  18
   1 -11  -1 19136.8 421.586  39
   1 -11  -1 19054.6 447.282  41
   1 -11  -1 19865.5 439.737  38
   1 -11  -1 19281.6 446.955  21
   1 -11  -1 19653.5 455.151   5
   1 -11  -1 19257.0 436.097  19
   1 -11  -1 19386.2 423.893  17
   1 -11  -1 20046.8 432.987  34
   1 -11  -1 19879.3 471.438  24
   1 -11   0 55.3274 23.3541  38
   1 -11   0 90.7389 32.6163  18
   1 -11   0 74.3118 28.4200  19
   1 -11   0 42.0344 29.5085  21
   1 -11   0 66.8186 26.2300  34
   1 -11   0 69.5492 19.9944  39
   1 -11   0 16.3232 29.6867   5
   1 -11   0 78.9538 24.3372  17
   1 -11   0 33.1010 32.3093  24
   1 -11   1 640.398 46.8742  38
   1 -11   1 698.498 52.8038  19
   1 -11   1 718.496 56.1073  18
   1 -11   1 662.530 55.9764   5
   1 -11   1 595.352 57.9319  24
   1 -11   1 632.140 41.9141  39
   1 -11   1 641.432 53.1123  21
   1 -11   1 696.601 51.1965  34
   1 -11   1 637.805 49.9282  17
   1 -11   2 1339.65 71.9143  21
   1 -11   2 1446.30 71.0785  19
   1 -11   2 1362.07 79.7330  24
   1 -11   2 1331.54 68.7795  34
   1 -11   2 1228.09 72.5339  18
   1 -11   2 1343.45 75.5845   5
   1 -11   2 1299.25 60.0066  39
   1 -11   2 1241.99 62.7467  38
   1 -11   2 1359.57 68.6247  17
   1 -11   3 8028.22 204.615  34
   1 -11   3 7582.11 215.431  24
   1 -11   3 8129.90 203.903  19
   1 -11   3 7225.30 205.118  18
   1 -11   3 7402.12 187.788  39
   1 -11   3 7488.25 201.953  21
   1 -11   3 7612.98 207.634   5
   1 -11   3 7801.43 203.097  17
   1 -11   4 5555.42 148.636  39
   1 -11   4 5564.28 166.269  18
   1 -11   4 6240.68 166.363  34
   1 -11   4 5625.12 157.800  21
   1 -11   4 6117.58 166.293  17
   1 -11   4 6168.65 164.707  19
   1 -11   5 32.7034 23.0042  18
   1 -11   5 25.7321 21.2285  34
   1 -11   5 25.2407 22.2102  17
   1 -11   5 76.1024 21.0583  19
   1 -11   6 4967.42 140.669  34
   1 -11   6 5309.96 140.603  19
   1 -11   6 5110.16 142.915  17
   1 -11   6 4973.80 142.597  18
   1 -11   7 278.001 27.6117  18
   1 -11   7 260.972 27.3897  34
   1 -11   7 279.589 25.2637  19
   1 -10 -15 1136.48 51.0389  32
   1 -10 -15 1060.60 43.4160  25
   1 -10 -15 1037.64 48.9099  38
   1 -10 -14 21.5361 11.8791  41
   1 -10 -14 62.0675 19.9115  32
   1 -10 -14 63.0188 19.7911  38
   1 -10 -14 88.0117 17.0988  25
   1 -10 -13 1472.02 71.5120  38
   1 -10 -13 1515.61 69.7245  32
   1 -10 -13 1565.81 61.7489  25
   1 -10 -13 1405.92 69.6030  41
   1 -10 -12 2239.02 95.6293  38
   1 -10 -12 2155.30 79.5816  25
   1 -10 -12 2280.49 98.6463  41
   1 -10 -12 2349.49 91.7614  32
   1 -10 -11 1420.82 63.3153  25
   1 -10 -11 1366.14 76.4692  38
   1 -10 -11 1484.53 83.5156  41
   1 -10 -11 1506.89 73.9398  32
   1 -10 -10 6.57490 16.5438  21
   1 -10 -10-2.66686 16.2883  25
   1 -10 -10 30.0892 28.8591  32
   1 -10 -10 12.2718 18.3972  24
   1 -10 -10 27.1145 19.8588   5
   1 -10 -10 34.3241 29.1114  38
   1 -10 -10 30.9621 32.6866  41
   1 -10  -9 2168.68 79.9749  25
   1 -10  -9 2225.10 104.121  38
   1 -10  -9 2187.18 110.880  41
   1 -10  -9 2055.25 90.8357   5
   1 -10  -9 1988.72 86.5281  21
   1 -10  -9 2054.40 98.6608  24
   1 -10  -9 2216.52 95.2426  32
   1 -10  -8 8551.97 231.093  21
   1 -10  -8 8917.36 232.935  32
   1 -10  -8 8536.69 236.807   5
   1 -10  -8 8606.81 265.715  22
   1 -10  -8 8441.98 249.807  24
   1 -10  -8 8408.49 259.302  41
   1 -10  -8 9279.40 250.763  38
   1 -10  -7 370.269 43.5155  21
   1 -10  -7 354.628 38.5916  32
   1 -10  -7 336.336 46.6243  24
   1 -10  -7 306.452 52.1542  41
   1 -10  -7 330.550 33.7250  18
   1 -10  -7 289.212 52.9186  22
   1 -10  -7 275.557 40.5555   5
   1 -10  -7 325.502 48.2991  38
   1 -10  -6 2836.22 131.968  24
   1 -10  -6 2996.90 125.459  38
   1 -10  -6 2840.31 107.020  18
   1 -10  -6 2767.55 247.473   3
   1 -10  -6 2916.65 111.562  32
   1 -10  -6 3061.15 142.965  22
   1 -10  -6 2965.56 120.982  42
   1 -10  -6 2827.12 131.747  41
   1 -10  -6 2903.80 110.825  34
   1 -10  -6 2949.52 124.331   5
   1 -10  -6 2888.25 119.223  21
   1 -10  -5 1358.12 92.1197  41
   1 -10  -5 1436.24 94.6308  24
   1 -10  -5 1431.03 75.2214  18
   1 -10  -5 1500.64 82.9983  19
   1 -10  -5 1400.05 96.0894  22
   1 -10  -5 1396.98 82.4776  21
   1 -10  -5 1324.90 175.663   3
   1 -10  -5 1374.52 73.0991  39
   1 -10  -5 1450.29 74.1741  32
   1 -10  -5 1440.59 74.6776  34
   1 -10  -5 1479.54 84.5296  42
   1 -10  -5 1392.89 85.1219  38
   1 -10  -5 1417.52 86.2956   5
   1 -10  -4 24123.4 846.992   3
   1 -10  -4 24510.7 536.555  19
   1 -10  -4 22766.6 564.717  24
   1 -10  -4 24799.5 547.272  38
   1 -10  -4 24351.8 553.358   5
   1 -10  -4 22978.8 557.006  41
   1 -10  -4 24322.0 545.285  21
   1 -10  -4 24256.7 545.542  42
   1 -10  -4 23927.8 525.509  18
   1 -10  -4 24748.5 523.342  32
   1 -10  -4 23985.1 522.142  34
   1 -10  -4 23681.8 521.868  39
   1 -10  -4 23907.4 569.683  22
   1 -10  -3 190.970 42.3663  21
   1 -10  -3 180.112 35.8909  18
   1 -10  -3 224.802 47.4811  24
   1 -10  -3 170.191 36.8566  19
   1 -10  -3 163.859 39.8950  42
   1 -10  -3 171.698 42.3895  41
   1 -10  -3 217.523 40.3923  38
   1 -10  -3 191.045 30.8778  32
   1 -10  -3 108.056 73.2819   3
   1 -10  -3 193.868 33.0182  34
   1 -10  -3 98.3521 36.6398   5
   1 -10  -3 157.580 28.6696  39
   1 -10  -3 157.065 40.3792  22
   1 -10  -2 4603.14 155.534  18
   1 -10  -2 4830.55 175.321  22
   1 -10  -2 4532.00 168.440   5
   1 -10  -2 4843.87 152.542  34
   1 -10  -2 4766.22 165.485  42
   1 -10  -2 4694.39 145.657  32
   1 -10  -2 4808.99 334.695   3
   1 -10  -2 4538.81 163.770  21
   1 -10  -2 4527.12 170.047  41
   1 -10  -2 4535.18 160.437  38
   1 -10  -2 4545.96 144.781  39
   1 -10  -2 4579.21 153.818  19
   1 -10  -2 4879.68 185.184  24
   1 -10  -1 298.682 44.0883  42
   1 -10  -1 339.410 34.4593  32
   1 -10  -1 316.916 54.8920  24
   1 -10  -1 351.077 41.8618  34
   1 -10  -1 349.955 46.9701  41
   1 -10  -1 343.553 42.7348  19
   1 -10  -1 297.095 41.3535  18
   1 -10  -1 301.221 44.7603  22
   1 -10  -1 384.293 104.923   3
   1 -10  -1 330.527 46.2116  38
   1 -10  -1 220.425 41.5619  21
   1 -10  -1 325.498 48.5623   5
   1 -10  -1 329.936 34.6520  39
   1 -10   0 3215.51 109.584  32
   1 -10   0 3237.99 135.412   5
   1 -10   0 3092.96 110.083  39
   1 -10   0 3037.32 128.202  21
   1 -10   0 3010.09 258.999   3
   1 -10   0 3089.71 127.646  42
   1 -10   0 3337.50 121.003  34
   1 -10   0 3230.54 125.863  18
   1 -10   0 3089.27 130.820  22
   1 -10   0 3128.20 129.426  41
   1 -10   0 3236.77 144.169  24
   1 -10   0 3145.28 124.300  38
   1 -10   0 3254.17 120.284  19
   1 -10   1 462.702 100.187   3
   1 -10   1 527.363 52.7372  18
   1 -10   1 605.921 58.7322   5
   1 -10   1 490.962 49.1266  34
   1 -10   1 584.033 54.8992  21
   1 -10   1 485.473 39.8005  39
   1 -10   1 565.260 50.4944  19
   1 -10   1 477.451 37.6586  32
   1 -10   1 570.052 61.5960  24
   1 -10   1 578.477 52.0181  38
   1 -10   1 500.509 50.4736  42
   1 -10   1 508.602 47.7749  17
   1 -10   1 486.419 50.2554  41
   1 -10   2 192.981 37.5844  34
   1 -10   2 219.381 30.0030  39
   1 -10   2 221.509 38.3441  17
   1 -10   2 238.897 42.7419  24
   1 -10   2 213.698 32.3241  38
   1 -10   2 222.396 39.0654   5
   1 -10   2 233.521 84.5181   3
   1 -10   2 228.780 35.3170  20
   1 -10   2 260.172 39.2993  42
   1 -10   2 187.320 34.8935  21
   1 -10   3 14.6176 26.0156  34
   1 -10   3-3.30032 28.9780  17
   1 -10   3 32.2883 28.4744  24
   1 -10   3 26.4496 26.4092  20
   1 -10   3 23.2609 13.8956  30
   1 -10   3 12.0565 18.6501  38
   1 -10   3 5.69670 25.8801  21
   1 -10   3 2.60781 18.1937  39
   1 -10   3 53.3564 30.8367   5
   1 -10   4 4120.25 126.296  30
   1 -10   4 4387.79 145.693  17
   1 -10   4 4206.00 151.439  24
   1 -10   4 4416.03 144.635  34
   1 -10   4 4297.18 142.492  21
   1 -10   4 4447.47 132.623  39
   1 -10   4 4313.90 146.221   5
   1 -10   4 4301.90 141.359  20
   1 -10   5 4129.41 125.673  30
   1 -10   5 4223.84 136.481   5
   1 -10   5 4183.35 139.961  20
   1 -10   5 4414.54 143.778  17
   1 -10   5 4249.44 132.801  21
   1 -10   5 4351.16 129.484  39
   1 -10   5 4460.33 141.657  34
   1 -10   5 3795.73 138.290  24
   1 -10   6 2064.72 92.5739  18
   1 -10   6 2248.06 94.1965  17
   1 -10   6 2110.33 81.2756  30
   1 -10   6 2278.51 93.8053  20
   1 -10   6 2139.62 81.2977  39
   1 -10   6 2053.10 90.0158  34
   1 -10   7 276.222 29.2173  30
   1 -10   7 265.747 35.0369  17
   1 -10   7 348.348 37.5344  18
   1 -10   7 289.519 37.7904  34
   1 -10   7 280.086 27.6653  39
   1 -10   8 1196.33 54.8772  30
   1 -10   8 1153.60 59.4000  18
   1 -10   8 1235.97 53.8407  39
   1 -10   8 1137.47 59.6790  34
   1 -10   8 1187.35 61.9892  20
   1 -10   9 7247.09 180.521  34
   1 -10   9 6987.92 167.033  39
   1 -10   9 6953.97 174.448  18
   1 -10   9 6957.03 171.795  30
   1 -10   9 7153.04 183.165  20
   1 -10  10 640.562 34.2142  30
   1 -10  10 646.962 38.0280  34
   1 -10  10 649.794 39.4847  20
   1 -10  10 607.083 30.6457  18
   1  -9 -16 264.637 26.5154  25
   1  -9 -16 284.433 26.1804  38
   1  -9 -16 260.288 27.9456  32
   1  -9 -15 7855.20 201.847  32
   1  -9 -15 7822.05 202.004  38
   1  -9 -15 8116.41 198.536  25
   1  -9 -14 1512.49 71.8411  41
   1  -9 -14 1662.15 77.5026  38
   1  -9 -14 1575.21 59.1438  26
   1  -9 -14 1657.48 76.3444  32
   1  -9 -14 1624.41 71.7478  25
   1  -9 -13 883.342 45.1586  26
   1  -9 -13 927.408 60.6364  32
   1  -9 -13 848.983 59.4096  38
   1  -9 -13 908.688 55.0592  25
   1  -9 -13 832.256 57.2484  41
   1  -9 -12 940.314 62.2182  32
   1  -9 -12 916.165 55.8151  25
   1  -9 -12 911.613 66.1655  41
   1  -9 -12 947.569 64.1217  38
   1  -9 -12 885.681 45.5517  26
   1  -9 -11 7488.88 219.934  38
   1  -9 -11 7451.75 193.873   2
   1  -9 -11 7228.17 228.221  41
   1  -9 -11 7505.73 202.329  25
   1  -9 -11 7413.36 210.816  32
   1  -9 -10 79.8204 22.5688  21
   1  -9 -10 92.3115 33.0697  38
   1  -9 -10 108.936 34.8443  41
   1  -9 -10 83.0494 33.3882  22
   1  -9 -10 46.6915 28.6285  32
   1  -9 -10 130.113 28.8030  24
   1  -9 -10 52.4980 22.6415  25
   1  -9 -10 108.657 25.6532   5
   1  -9  -9 4949.39 156.430  21
   1  -9  -9 5122.88 163.108   5
   1  -9  -9 4655.58 167.539  24
   1  -9  -9 5161.53 164.349  32
   1  -9  -9 5080.62 173.595  38
   1  -9  -9 5047.09 185.249  41
   1  -9  -9 4745.54 185.563  22
   1  -9  -9 5077.48 153.094  25
   1  -9  -8 14157.9 585.075   3
   1  -9  -8 15345.7 362.333  42
   1  -9  -8 14504.2 342.059  18
   1  -9  -8 15022.1 366.603   5
   1  -9  -8 14805.5 399.510  22
   1  -9  -8 15832.5 381.157  38
   1  -9  -8 15316.2 361.004  21
   1  -9  -8 15162.9 347.339  25
   1  -9  -8 14936.2 393.351  41
   1  -9  -8 16247.4 367.736  32
   1  -9  -8 14663.2 381.275  24
   1  -9  -7 1794.54 96.5270  38
   1  -9  -7 1676.23 85.7629  21
   1  -9  -7 1841.78 77.0682  25
   1  -9  -7 1595.53 95.5899  24
   1  -9  -7 1647.72 76.5416  18
   1  -9  -7 1610.30 101.075  41
   1  -9  -7 1746.32 106.934  22
   1  -9  -7 1465.67 173.115   3
   1  -9  -7 1641.84 86.3621  42
   1  -9  -7 1674.93 81.9668  34
   1  -9  -7 1757.14 86.3482  32
   1  -9  -7 1563.52 87.4135   5
   1  -9  -6 10184.2 252.382  18
   1  -9  -6 9887.80 295.151  22
   1  -9  -6 9767.87 288.691  24
   1  -9  -6 10195.9 267.967  21
   1  -9  -6 10474.2 278.909  38
   1  -9  -6 10049.4 269.949  19
   1  -9  -6 10008.3 273.113   5
   1  -9  -6 9507.76 264.012  42
   1  -9  -6 9650.99 252.141  34
   1  -9  -6 9497.04 473.561   3
   1  -9  -6 10557.0 263.738  32
   1  -9  -5 19346.7 426.228  34
   1  -9  -5 19172.5 450.551  38
   1  -9  -5 18638.4 465.388  41
   1  -9  -5 18981.0 440.227  19
   1  -9  -5 17974.4 463.782  24
   1  -9  -5 19721.6 434.186  32
   1  -9  -5 19067.4 427.473  18
   1  -9  -5 18149.6 439.751  42
   1  -9  -5 19017.0 432.997  39
   1  -9  -5 19063.4 474.533  22
   1  -9  -5 19411.9 445.771  21
   1  -9  -5 18445.5 447.425   5
   1  -9  -5 18316.2 702.613   3
   1  -9  -4 5837.67 172.871  18
   1  -9  -4 5326.64 166.815  39
   1  -9  -4 5445.13 179.789  42
   1  -9  -4 5431.73 197.035  22
   1  -9  -4 5618.90 182.423  21
   1  -9  -4 5474.01 198.524  24
   1  -9  -4 5383.95 193.430  41
   1  -9  -4 5779.03 168.480  34
   1  -9  -4 4998.95 338.714   3
   1  -9  -4 5492.84 185.687   5
   1  -9  -4 5826.97 172.189  32
   1  -9  -4 4898.91 378.111  23
   1  -9  -4 5608.38 184.623  38
   1  -9  -4 5868.07 178.664  19
   1  -9  -3 176.511 95.1611  23
   1  -9  -3 254.058 85.4335   3
   1  -9  -3 317.892 46.9933  22
   1  -9  -3 271.593 36.5500  18
   1  -9  -3 325.803 36.0168  39
   1  -9  -3 252.182 41.3280  42
   1  -9  -3 326.787 50.8694  24
   1  -9  -3 240.906 37.4079  38
   1  -9  -3 297.362 39.5691  19
   1  -9  -3 248.095 41.4965   5
   1  -9  -3 280.750 35.7541  34
   1  -9  -3 288.792 35.2235  32
   1  -9  -3 319.271 42.4665  21
   1  -9  -3 255.433 43.1102  41
   1  -9  -2 866.952 70.4417  41
   1  -9  -2 896.444 70.1597   5
   1  -9  -2 1006.59 70.4692  38
   1  -9  -2 1034.53 66.4940  18
   1  -9  -2 965.773 60.9806  34
   1  -9  -2 871.159 71.5152  22
   1  -9  -2 1066.54 173.617  23
   1  -9  -2 960.470 59.7339  32
   1  -9  -2 804.700 63.8039  21
   1  -9  -2 929.267 61.4551  19
   1  -9  -2 1160.53 157.974   3
   1  -9  -2 994.976 58.5376  39
   1  -9  -2 1051.05 81.5216  24
   1  -9  -2 1031.26 72.1714  42
   1  -9  -1 28868.8 626.219  42
   1  -9  -1 28115.3 625.844  38
   1  -9  -1 28102.5 922.334   3
   1  -9  -1 29250.4 607.920  32
   1  -9  -1 28721.6 600.613  39
   1  -9  -1 28221.9 634.185   5
   1  -9  -1 29007.6 643.319  22
   1  -9  -1 28503.3 628.045  21
   1  -9  -1 28152.7 1006.94  23
   1  -9  -1 28899.9 609.095  34
   1  -9  -1 27747.0 634.407  41
   1  -9  -1 28461.9 651.852  24
   1  -9  -1 28309.1 609.560  19
   1  -9   0 2544.19 99.5417  32
   1  -9   0 2574.68 125.644  24
   1  -9   0 2509.50 102.964  34
   1  -9   0 2578.67 100.249  20
   1  -9   0 2515.72 109.843  42
   1  -9   0 2349.46 253.229  23
   1  -9   0 2472.72 109.806  38
   1  -9   0 2580.65 115.457  41
   1  -9   0 2384.35 113.696   5
   1  -9   0 2440.23 227.965   3
   1  -9   0 2434.81 94.4282  39
   1  -9   0 2486.62 111.966  21
   1  -9   0 2434.45 113.980  22
   1  -9   1 135.993 26.1748  39
   1  -9   1 136.455 39.1787  24
   1  -9   1 81.8836 27.9731  22
   1  -9   1 105.029 28.2254  41
   1  -9   1 91.5780 32.1880   5
   1  -9   1 67.8326 27.4501  34
   1  -9   1 140.448 29.2923  20
   1  -9   1 88.9761 60.0230   3
   1  -9   1 126.618 31.8889  38
   1  -9   1 86.9607 20.7798  32
   1  -9   1 85.3262 32.9567  42
   1  -9   1 102.076 30.1953  21
   1  -9   2 1759.45 86.6087  34
   1  -9   2 1875.01 76.5548  30
   1  -9   2 1856.72 194.739   3
   1  -9   2 1738.19 89.9091  42
   1  -9   2 1715.53 77.0220  32
   1  -9   2 1778.53 91.0293  38
   1  -9   2 1831.21 98.7293   5
   1  -9   2 1863.28 86.0715  20
   1  -9   2 1640.42 88.5958  41
   1  -9   2 1775.19 100.829  24
   1  -9   2 1975.99 98.9518  21
   1  -9   2 1914.71 81.7540  39
   1  -9   2 1800.84 89.2343  22
   1  -9   3 17392.6 403.164  42
   1  -9   3 17076.7 654.548   3
   1  -9   3 16714.5 393.427  20
   1  -9   3 16218.8 398.659  38
   1  -9   3 16749.2 418.738  24
   1  -9   3 17052.1 396.060  34
   1  -9   3 17807.0 388.197  39
   1  -9   3 17151.6 405.890  21
   1  -9   3 17117.4 412.990   5
   1  -9   3 16904.0 380.041  30
   1  -9   4 1330.41 76.8165  17
   1  -9   4 1163.33 69.3434  38
   1  -9   4 1311.78 75.0114  20
   1  -9   4 1315.19 75.9347  21
   1  -9   4 1369.83 74.4605  42
   1  -9   4 1393.51 77.7748  34
   1  -9   4 1364.42 67.9996  30
   1  -9   4 1397.99 81.3722   5
   1  -9   4 1419.81 168.469   3
   1  -9   4 1370.70 81.9355  24
   1  -9   4 1390.89 69.6770  39
   1  -9   5 181.068 35.8953  20
   1  -9   5 173.081 29.2251  39
   1  -9   5 211.429 32.4118  24
   1  -9   5 204.414 38.3189  34
   1  -9   5 206.811 32.4041  21
   1  -9   5 174.473 28.0056  30
   1  -9   5 214.371 41.3445  17
   1  -9   5 183.847 31.7387   5
   1  -9   6-17.5934 30.2030  34
   1  -9   6 18.7155 27.5384  17
   1  -9   6 54.2324 30.7800  20
   1  -9   6 17.2654 18.7283  24
   1  -9   6 63.2849 19.5803  21
   1  -9   6 56.3481 23.8388  39
   1  -9   6 23.8909 21.9930  30
   1  -9   6 32.5017 18.6225   5
   1  -9   7 7173.00 195.397  39
   1  -9   7 7334.16 198.937  30
   1  -9   7 7262.80 207.060  17
   1  -9   7 7008.91 204.545  20
   1  -9   7 7416.07 203.969  34
   1  -9   8 79.3997 24.0740  39
   1  -9   8 87.1581 25.4948  30
   1  -9   8 106.557 32.2398  20
   1  -9   8 136.397 33.7033  17
   1  -9   9 83.3580 30.8106  20
   1  -9   9 76.0923 21.8836  39
   1  -9   9 99.7745 28.3874  34
   1  -9   9 91.9158 25.9449  30
   1  -9  10 328.810 37.4910  20
   1  -9  10 375.092 37.1056  34
   1  -9  10 314.350 30.0829  39
   1  -9  10 295.778 29.7915  18
   1  -9  10 369.931 35.2802  30
   1  -9  11 8132.98 200.735  20
   1  -9  11 7678.11 192.589  34
   1  -9  11 7984.42 186.755  39
   1  -9  11 8141.45 193.772  30
   1  -9  12 52.1237 18.4710  20
   1  -9  12 57.8983 15.0171  34
   1  -9  12 70.2167 16.1532  30
   1  -9  12 50.9571 12.1036  39
   1  -8 -17 545.306 37.7602  32
   1  -8 -17 519.227 37.5729  25
   1  -8 -17 515.759 32.9780  38
   1  -8 -17 543.943 32.1743  26
   1  -8 -16 157.079 26.6322  25
   1  -8 -16 154.541 26.4997  38
   1  -8 -16 165.849 27.6643  32
   1  -8 -16 113.500 19.7441  26
   1  -8 -15 2022.91 87.4840  38
   1  -8 -15 2089.03 88.5643  25
   1  -8 -15 1986.83 76.7633  26
   1  -8 -15 2063.90 87.6397  32
   1  -8 -14 8745.69 237.330  41
   1  -8 -14 9403.59 246.867  38
   1  -8 -14 9607.51 244.444  25
   1  -8 -14 9126.68 241.963  32
   1  -8 -14 9175.84 234.140   2
   1  -8 -13 9618.97 254.737  32
   1  -8 -13 9657.63 244.637   2
   1  -8 -13 9473.96 252.973  25
   1  -8 -13 9217.37 257.749  41
   1  -8 -13 10059.8 262.669  38
   1  -8 -12 21725.6 477.450   2
   1  -8 -12 21180.6 734.760   1
   1  -8 -12 22904.6 494.068  32
   1  -8 -12 21906.0 489.496  25
   1  -8 -12 20942.8 503.287  41
   1  -8 -12 21850.0 499.272  38
   1  -8 -11 68976.7 1404.38  25
   1  -8 -11 69688.9 1391.94   2
   1  -8 -11 73258.7 1438.01  41
   1  -8 -11 74234.0 1426.55  38
   1  -8 -11 75236.0 1742.99   1
   1  -8 -11 69743.0 1409.59  32
   1  -8 -10 1782.99 80.1838   2
   1  -8 -10 1975.02 86.7519   5
   1  -8 -10 1863.81 97.3988  38
   1  -8 -10 1779.09 86.1541  25
   1  -8 -10 1763.83 101.732  41
   1  -8 -10 1887.39 186.472   1
   1  -8 -10 1869.60 91.4175  32
   1  -8 -10 1662.67 99.8054  22
   1  -8  -9 5737.52 172.966  25
   1  -8  -9 5997.90 164.971   2
   1  -8  -9 5679.04 175.812   5
   1  -8  -9 5856.44 323.739   1
   1  -8  -9 5942.72 159.461  26
   1  -8  -9 5623.30 187.516  24
   1  -8  -9 5520.52 198.831  22
   1  -8  -9 5432.42 321.559   3
   1  -8  -9 5305.55 185.519  38
   1  -8  -9 5990.16 182.362  32
   1  -8  -9 5777.63 171.969  21
   1  -8  -9 5752.11 172.537  42
   1  -8  -9 5643.20 198.085  41
   1  -8  -8 2820.54 113.149  32
   1  -8  -8 2847.63 132.684  22
   1  -8  -8 2816.22 98.2217   2
   1  -8  -8 2601.38 220.471   3
   1  -8  -8 2721.17 99.2450  18
   1  -8  -8 2852.47 113.611   5
   1  -8  -8 2765.38 107.042  25
   1  -8  -8 2709.97 119.089  38
   1  -8  -8 2622.90 125.858  41
   1  -8  -8 2905.85 111.420  42
   1  -8  -8 2587.01 119.262  24
   1  -8  -8 2679.06 207.918   1
   1  -8  -8 2616.82 107.315  21
   1  -8  -7 53964.1 1113.65  41
   1  -8  -7 54232.3 1388.31   3
   1  -8  -7 54532.3 1096.41  38
   1  -8  -7 52999.7 1048.13   2
   1  -8  -7 53566.4 1061.51  18
   1  -8  -7 54483.0 1073.15  34
   1  -8  -7 52383.8 1116.39  22
   1  -8  -7 55635.2 1314.98   1
   1  -8  -7 53448.1 1104.58  24
   1  -8  -7 52495.9 1081.94   5
   1  -8  -7 51659.9 1075.52  42
   1  -8  -7 51649.8 1074.29  21
   1  -8  -7 54900.4 1082.18  32
   1  -8  -7 55710.3 1071.87  25
   1  -8  -6 3877.09 157.600  22
   1  -8  -6 3868.93 151.711  24
   1  -8  -6 3964.39 276.122   3
   1  -8  -6 4115.94 132.224  34
   1  -8  -6 3987.23 139.068  42
   1  -8  -6 3978.61 155.476  41
   1  -8  -6 3865.41 136.509  21
   1  -8  -6 3932.79 138.780  39
   1  -8  -6 3962.76 146.233  38
   1  -8  -6 3489.41 297.200  23
   1  -8  -6 4011.18 142.189   5
   1  -8  -6 4087.64 138.287  32
   1  -8  -6 4073.55 234.026   1
   1  -8  -6 4024.12 129.059  18
   1  -8  -6 4079.95 129.057  25
   1  -8  -6 3892.91 141.521  19
   1  -8  -5 443.135 42.6796  32
   1  -8  -5 439.448 38.8195  34
   1  -8  -5 445.523 45.3943  42
   1  -8  -5 341.067 66.6332   1
   1  -8  -5 362.084 45.1976  41
   1  -8  -5 412.909 51.8041  22
   1  -8  -5 380.192 42.6735   5
   1  -8  -5 327.868 99.0357  23
   1  -8  -5 432.734 36.6049  25
   1  -8  -5 488.241 42.8143  39
   1  -8  -5 445.595 50.9226  24
   1  -8  -5 401.491 42.5522  19
   1  -8  -5 381.154 43.3674  38
   1  -8  -5 420.918 99.4574   3
   1  -8  -5 377.384 40.4442  21
   1  -8  -5 398.470 37.9163  18
   1  -8  -4 14466.2 637.104  23
   1  -8  -4 15270.2 350.518  32
   1  -8  -4 14917.8 356.002  21
   1  -8  -4 14385.3 352.632  42
   1  -8  -4 15184.2 364.874  38
   1  -8  -4 14418.9 371.458  41
   1  -8  -4 14206.3 374.188  24
   1  -8  -4 14888.2 351.852  19
   1  -8  -4 14611.0 359.206   5
   1  -8  -4 16159.9 604.954   3
   1  -8  -4 15000.2 347.674  18
   1  -8  -4 14816.7 346.089  39
   1  -8  -4 14838.3 379.694  22
   1  -8  -4 14907.9 339.835  34
   1  -8  -3 18024.0 407.717  19
   1  -8  -3 18261.6 416.484  42
   1  -8  -3 18450.5 440.235  22
   1  -8  -3 17772.0 415.846  21
   1  -8  -3 17983.4 407.482  32
   1  -8  -3 16764.2 700.276  23
   1  -8  -3 17558.4 406.762  18
   1  -8  -3 18811.0 403.458  34
   1  -8  -3 18064.1 422.793  38
   1  -8  -3 17899.3 400.940  39
   1  -8  -3 18806.3 424.798   5
   1  -8  -3 17736.0 431.748  41
   1  -8  -3 17831.2 437.765  24
   1  -8  -2 1825.28 98.0548  24
   1  -8  -2 1708.57 79.3002  19
   1  -8  -2 1949.39 84.1350  32
   1  -8  -2 1805.65 76.9781  39
   1  -8  -2 1737.49 85.1040  42
   1  -8  -2 1533.09 197.790  23
   1  -8  -2 1742.38 87.6607  38
   1  -8  -2 1747.97 92.5425  41
   1  -8  -2 1679.23 92.2657  22
   1  -8  -2 1842.64 88.2000  21
   1  -8  -2 1991.63 82.2472  34
   1  -8  -2 1736.47 88.8930   5
   1  -8  -1 25213.6 564.688  24
   1  -8  -1 24649.8 548.764   5
   1  -8  -1 24490.3 531.602  32
   1  -8  -1 24523.2 520.922  39
   1  -8  -1 24851.4 526.039  20
   1  -8  -1 24623.3 543.443  21
   1  -8  -1 24797.8 540.890  42
   1  -8  -1 25607.1 559.073  22
   1  -8  -1 25406.7 808.043   3
   1  -8  -1 24853.1 528.977  34
   1  -8  -1 24545.0 552.678  41
   1  -8  -1 25208.9 874.725  23
   1  -8  -1 23780.9 544.470  38
   1  -8   0 39013.5 787.889  32
   1  -8   0 37528.9 782.770  20
   1  -8   0 37228.7 784.096  34
   1  -8   0 37580.8 1146.24  23
   1  -8   0 41925.7 1106.81   3
   1  -8   0 38472.9 800.003  21
   1  -8   0 39455.7 821.316  24
   1  -8   0 39178.0 811.395  22
   1  -8   0 38437.4 806.797  41
   1  -8   0 38960.1 777.362  39
   1  -8   0 37718.9 800.312  38
   1  -8   0 38308.4 818.566  12
   1  -8   0 37241.9 795.131  42
   1  -8   0 39165.5 807.884   5
   1  -8   1 120.007 31.5066  42
   1  -8   1 59.1977 24.2136  21
   1  -8   1 71.0538 16.7451  30
   1  -8   1 85.0603 26.9372   5
   1  -8   1 118.259 23.8551  39
   1  -8   1 67.2078 28.1828  12
   1  -8   1 60.9829 26.4905  24
   1  -8   1 131.920 23.5230  32
   1  -8   1 95.7055 26.0386  38
   1  -8   1 34.0790 55.7189  23
   1  -8   1 101.043 25.9074  20
   1  -8   1 95.5040 26.2437  22
   1  -8   1 115.747 27.2248  34
   1  -8   1 58.0568 22.4252  41
   1  -8   1 106.763 54.0742   3
   1  -8   2 118.013 29.6258  21
   1  -8   2 107.893 68.5724  23
   1  -8   2 94.0747 29.7001  12
   1  -8   2 89.8342 27.9374  34
   1  -8   2 167.090 28.2238  41
   1  -8   2 98.0214 22.8057  22
   1  -8   2 85.7783 18.6110  30
   1  -8   2 120.344 29.9906  42
   1  -8   2 84.4025 28.7238   5
   1  -8   2 151.563 24.4190  32
   1  -8   2 79.9542 21.6159  39
   1  -8   2 77.4815 29.3501  24
   1  -8   2 89.2659 22.3614  38
   1  -8   2 79.1842 49.5985   3
   1  -8   2 106.431 23.7410  20
   1  -8   3 864.972 53.5751  39
   1  -8   3 815.918 61.3318   5
   1  -8   3 845.164 63.1048  24
   1  -8   3 789.642 55.0906  41
   1  -8   3 816.721 50.6435  30
   1  -8   3 820.562 51.5781  32
   1  -8   3 888.752 60.5040  42
   1  -8   3 857.103 56.6116  34
   1  -8   3 780.372 46.6291  33
   1  -8   3 850.153 140.690  23
   1  -8   3 868.590 60.5825  21
   1  -8   3 711.947 55.0508  38
   1  -8   3 830.102 63.3602  12
   1  -8   3 924.029 57.6760  20
   1  -8   3 897.865 131.469   3
   1  -8   4 41162.7 859.741  42
   1  -8   4 42257.9 1155.81   3
   1  -8   4 41754.9 881.644  12
   1  -8   4 42621.6 840.165  33
   1  -8   4 41392.2 874.262   5
   1  -8   4 41689.4 866.707  38
   1  -8   4 42908.6 880.309  24
   1  -8   4 42685.6 858.583  34
   1  -8   4 41683.8 857.143  20
   1  -8   4 41117.5 851.880  39
   1  -8   4 42425.4 869.525  21
   1  -8   4 42319.5 850.473  30
   1  -8   5 1162.23 64.8108  39
   1  -8   5 1315.99 71.8062  34
   1  -8   5 1119.98 68.7277   5
   1  -8   5 1283.60 68.8944  42
   1  -8   5 1217.71 69.3640  21
   1  -8   5 1160.82 59.0308  33
   1  -8   5 1016.13 65.1864  38
   1  -8   5 1208.79 65.4875  30
   1  -8   5 1206.84 72.6105  24
   1  -8   5 1184.25 76.1111  12
   1  -8   5 1232.79 58.7780  36
   1  -8   5 1171.35 68.3614  20
   1  -8   5 1130.19 70.7453  17
   1  -8   5 1087.94 147.022   3
   1  -8   6 4288.56 144.451   5
   1  -8   6 4427.96 142.598  39
   1  -8   6 4346.93 143.380  30
   1  -8   6 4141.26 147.421  17
   1  -8   6 4431.79 142.317  21
   1  -8   6 4243.67 130.949  36
   1  -8   6 4488.18 147.190  20
   1  -8   6 4234.74 145.065  24
   1  -8   6 4176.73 152.539  12
   1  -8   6 4106.64 140.912  34
   1  -8   6 4482.05 133.205  33
   1  -8   7 1004.06 61.9176  39
   1  -8   7 835.571 61.5965  12
   1  -8   7 964.296 63.6796  34
   1  -8   7 1001.47 55.1318  33
   1  -8   7 972.367 55.8917  36
   1  -8   7 966.741 63.2573  30
   1  -8   7 1014.88 68.2143  17
   1  -8   7 927.583 63.6798  20
   1  -8   8 8234.96 222.345  30
   1  -8   8 8219.93 222.424  20
   1  -8   8 8271.93 219.337  34
   1  -8   8 7970.73 224.705  17
   1  -8   8 8219.59 216.968  39
   1  -8   8 7742.22 197.641  29
   1  -8   8 7719.60 201.244  33
   1  -8   8 7494.21 216.772  12
   1  -8   9 821.369 60.8289  17
   1  -8   9 862.045 48.8650  29
   1  -8   9 934.214 63.1329  30
   1  -8   9 866.590 48.9379  33
   1  -8   9 932.707 64.8167  20
   1  -8   9 888.362 56.9611  39
   1  -8   9 913.351 61.4888  34
   1  -8  10 9133.28 223.842  33
   1  -8  10 9551.37 241.327  34
   1  -8  10 9224.99 224.053  29
   1  -8  10 9976.85 250.001  20
   1  -8  10 9384.16 238.441  39
   1  -8  10 9453.67 245.929  30
   1  -8  11 13241.0 316.382  30
   1  -8  11 13498.6 313.751  34
   1  -8  11 13914.0 321.045  20
   1  -8  11 13210.1 297.176  29
   1  -8  11 13417.0 310.891  39
   1  -8  12 484.045 37.0776  39
   1  -8  12 464.804 32.1156  29
   1  -8  12 515.936 43.4291  20
   1  -8  12 477.908 40.8224  30
   1  -8  12 480.115 38.7122  34
   1  -8  13 79.9277 17.9656  39
   1  -8  13 64.0799 21.0979  20
   1  -8  13 63.5576 18.1364  34
   1  -8  13 91.5848 22.4731  30
   1  -7 -18 41.0905 14.9628  32
   1  -7 -18 20.3068 14.6028  26
   1  -7 -18 22.9533 17.4706  25
   1  -7 -17 1972.88 82.7105  25
   1  -7 -17 1848.99 78.3915  32
   1  -7 -17 1829.91 72.1020  38
   1  -7 -16 883.960 56.2690   2
   1  -7 -16 916.833 60.9456  25
   1  -7 -16 829.799 54.2235  38
   1  -7 -16 874.679 58.3378  32
   1  -7 -15 18627.2 423.680  38
   1  -7 -15 18398.9 423.155  32
   1  -7 -15 17971.6 418.064   2
   1  -7 -15 19434.9 431.854  25
   1  -7 -14 136.756 65.0023   1
   1  -7 -14 83.3191 28.3558  38
   1  -7 -14 92.6294 29.8918   2
   1  -7 -13 145.772 26.3963  41
   1  -7 -13 301.614 82.2320   1
   1  -7 -13 223.839 33.7744   2
   1  -7 -13 229.637 38.6198  38
   1  -7 -12 10378.6 288.022  41
   1  -7 -12 11002.5 289.110  38
   1  -7 -12 10650.5 486.872   1
   1  -7 -12 11157.3 275.671   2
   1  -7 -11 9185.40 270.424  22
   1  -7 -11 10363.1 273.647  38
   1  -7 -11 9213.43 266.795  41
   1  -7 -11 9673.35 247.805   2
   1  -7 -11 10284.9 462.306   1
   1  -7 -10 2915.02 105.859   2
   1  -7 -10 2713.86 220.844   1
   1  -7 -10 2698.92 124.867  22
   1  -7 -10 2820.51 124.041  41
   1  -7 -10 2759.86 118.091  38
   1  -7  -9 1696.17 76.4426  42
   1  -7  -9 1603.95 91.1681  41
   1  -7  -9 1725.75 88.5252  38
   1  -7  -9 1567.86 77.5806   5
   1  -7  -9 1615.86 75.5200  21
   1  -7  -9 1722.67 164.851   3
   1  -7  -9 1750.86 169.702   1
   1  -7  -9 1536.18 90.9130  22
   1  -7  -9 1576.39 83.2697  24
   1  -7  -9 1690.49 74.7677   2
   1  -7  -8 69.1538 22.1069  42
   1  -7  -8 90.9529 24.4883  24
   1  -7  -8 65.5545 19.4491   2
   1  -7  -8 17.0527 38.0785   3
   1  -7  -8 39.0272 24.4618  38
   1  -7  -8 19.1098 21.0245  41
   1  -7  -8 65.4263 20.8853   5
   1  -7  -8 28.1177 22.0597  22
   1  -7  -8 48.8734 23.1426  32
   1  -7  -8 40.1473 17.5340  21
   1  -7  -8 66.5318 50.3600   1
   1  -7  -7 40557.4 1074.77   3
   1  -7  -7 41318.4 1038.76   1
   1  -7  -7 38357.2 816.136  42
   1  -7  -7 41242.1 808.411  18
   1  -7  -7 39392.6 839.563  24
   1  -7  -7 40991.4 826.091   5
   1  -7  -7 41858.6 856.568  22
   1  -7  -7 40351.1 801.948   2
   1  -7  -7 38907.5 1131.07  23
   1  -7  -7 40058.4 819.594  34
   1  -7  -7 40157.0 848.336  41
   1  -7  -7 39469.5 824.609  32
   1  -7  -7 40576.2 820.223  21
   1  -7  -7 39720.4 834.533  38
   1  -7  -6 16537.8 396.445  38
   1  -7  -6 16818.7 642.677  23
   1  -7  -6 16250.9 580.519   3
   1  -7  -6 17202.4 376.957  18
   1  -7  -6 17497.9 415.318  22
   1  -7  -6 18649.4 395.198  32
   1  -7  -6 17081.8 397.976  19
   1  -7  -6 16528.1 406.793  41
   1  -7  -6 17695.9 366.737   2
   1  -7  -6 17447.5 387.243  21
   1  -7  -6 16984.8 406.350  24
   1  -7  -6 15637.7 387.821  39
   1  -7  -6 16808.3 385.529  42
   1  -7  -6 17174.4 382.638  34
   1  -7  -6 16548.4 538.020   1
   1  -7  -6 16507.7 380.499  25
   1  -7  -6 17472.1 392.253   5
   1  -7  -5 9977.33 237.355  37
   1  -7  -5 10116.0 257.489  19
   1  -7  -5 10275.1 252.567  42
   1  -7  -5 9333.88 241.854  25
   1  -7  -5 10585.8 254.426  21
   1  -7  -5 9490.90 457.253  23
   1  -7  -5 10061.6 269.334  24
   1  -7  -5 10073.8 245.872  18
   1  -7  -5 10037.0 272.967  22
   1  -7  -5 10185.9 245.035  34
   1  -7  -5 10573.5 258.763   5
   1  -7  -5 10486.2 430.903   3
   1  -7  -5 10746.6 256.535  32
   1  -7  -5 10098.1 369.904   1
   1  -7  -5 9751.11 259.414  38
   1  -7  -5 9371.68 249.696  39
   1  -7  -5 10107.3 269.385  41
   1  -7  -4 7477.73 354.109   3
   1  -7  -4 7023.32 285.799   1
   1  -7  -4 7824.60 222.499  22
   1  -7  -4 7660.79 215.409  48
   1  -7  -4 7591.71 193.487  34
   1  -7  -4 7358.57 204.756   5
   1  -7  -4 7370.38 195.548  18
   1  -7  -4 7615.93 202.302  32
   1  -7  -4 7371.06 197.642  39
   1  -7  -4 7882.24 218.652  43
   1  -7  -4 7747.91 203.207  21
   1  -7  -4 7215.15 200.375  19
   1  -7  -4 7594.87 402.978  44
   1  -7  -4 7364.00 208.080  38
   1  -7  -4 7479.62 200.930  42
   1  -7  -4 7201.28 390.858  23
   1  -7  -4 7576.99 218.489  24
   1  -7  -4 7378.22 214.649  41
   1  -7  -4 7430.58 189.179  37
   1  -7  -3 25713.5 544.502   5
   1  -7  -3 26165.8 840.911  44
   1  -7  -3 25760.7 644.910   1
   1  -7  -3 25761.9 529.061  34
   1  -7  -3 24239.2 536.285  42
   1  -7  -3 26218.7 560.647  43
   1  -7  -3 24467.3 535.609  32
   1  -7  -3 24070.3 544.631  38
   1  -7  -3 25582.8 559.768  24
   1  -7  -3 24861.4 553.448  41
   1  -7  -3 24239.8 528.254  39
   1  -7  -3 25328.5 556.069  48
   1  -7  -3 25879.0 561.295  22
   1  -7  -3 26689.0 539.264  19
   1  -7  -3 25085.5 756.304   3
   1  -7  -3 25555.0 541.186  21
   1  -7  -3 25138.2 563.926  10
   1  -7  -3 24263.4 806.644  23
   1  -7  -3 25744.0 527.799  37
   1  -7  -2 831.503 54.0438  38
   1  -7  -2 820.696 47.2805  39
   1  -7  -2 833.865 111.501   3
   1  -7  -2 754.094 122.781  23
   1  -7  -2 790.262 55.6059  41
   1  -7  -2 841.354 47.1056  20
   1  -7  -2 842.342 54.0807   5
   1  -7  -2 774.954 46.8940  34
   1  -7  -2 780.720 57.9432  10
   1  -7  -2 748.791 48.3620  32
   1  -7  -2 818.771 58.9814  43
   1  -7  -2 810.898 52.2895  42
   1  -7  -2 792.102 58.7636  48
   1  -7  -2 803.049 51.2161  21
   1  -7  -2 799.412 127.985  44
   1  -7  -2 836.843 57.8751  22
   1  -7  -2 885.970 60.5800  24
   1  -7  -1 42635.4 837.593  22
   1  -7  -1 38252.9 814.266  42
   1  -7  -1 42541.3 847.114  10
   1  -7  -1 39303.9 814.492  32
   1  -7  -1 40571.1 830.083  41
   1  -7  -1 41829.6 806.138  39
   1  -7  -1 41103.7 825.208   5
   1  -7  -1 39467.1 824.186  38
   1  -7  -1 38842.7 833.261  48
   1  -7  -1 42855.3 1074.87   3
   1  -7  -1 39615.3 806.747  20
   1  -7  -1 41060.3 810.676  34
   1  -7  -1 40989.1 1130.44  23
   1  -7  -1 37832.7 832.189  12
   1  -7  -1 39385.5 1130.82  44
   1  -7  -1 37665.6 831.219  43
   1  -7  -1 40787.7 820.185  21
   1  -7  -1 42236.7 841.661  24
   1  -7   0 10262.1 258.796  32
   1  -7   0 10965.6 438.725   3
   1  -7   0 10363.1 267.716  38
   1  -7   0 10472.8 468.241  23
   1  -7   0 10414.9 254.640  20
   1  -7   0 10307.3 276.534  12
   1  -7   0 10615.5 256.954  34
   1  -7   0 10930.7 264.573  42
   1  -7   0 10807.8 253.151  39
   1  -7   0 10810.5 484.327  44
   1  -7   0 11048.8 273.112  41
   1  -7   0 11124.1 281.367  43
   1  -7   0 11030.0 270.856   5
   1  -7   0 11338.1 276.409  22
   1  -7   0 11138.2 280.872  48
   1  -7   0 10787.4 266.048  21
   1  -7   0 11022.6 279.932  24
   1  -7   1 1169.84 68.6553  12
   1  -7   1 1247.19 55.8312  30
   1  -7   1 1245.35 158.489  44
   1  -7   1 1217.95 59.4243  20
   1  -7   1 1315.30 69.5241   5
   1  -7   1 1241.87 66.3302  41
   1  -7   1 1237.90 64.8609  42
   1  -7   1 1095.34 59.2007  32
   1  -7   1 1148.28 69.1815  48
   1  -7   1 1279.72 143.269   3
   1  -7   1 1226.38 66.8035  22
   1  -7   1 1171.14 65.8044  38
   1  -7   1 1159.63 63.7901  21
   1  -7   1 1244.30 72.4682  43
   1  -7   1 1175.87 60.0313  34
   1  -7   1 1393.97 159.409  23
   1  -7   1 1309.87 72.0349  24
   1  -7   1 1221.52 59.3077  39
   1  -7   2 795.387 52.5712  41
   1  -7   2 765.613 47.3472  39
   1  -7   2 880.734 53.7447  22
   1  -7   2 1011.94 54.3788  34
   1  -7   2 794.823 44.3447  33
   1  -7   2 814.112 48.9921  20
   1  -7   2 795.481 126.374  23
   1  -7   2 888.730 59.3296  12
   1  -7   2 927.344 55.1420  42
   1  -7   2 781.347 49.4439  32
   1  -7   2 864.174 114.339   3
   1  -7   2 827.698 53.9816  21
   1  -7   2 857.209 59.0089  24
   1  -7   2 861.574 47.8637  30
   1  -7   2 826.189 53.9908  38
   1  -7   2 874.860 57.0846   5
   1  -7   3 10104.5 254.193  21
   1  -7   3 9769.78 256.922   5
   1  -7   3 9747.82 241.664  39
   1  -7   3 9916.07 252.504  38
   1  -7   3 9562.91 232.260  33
   1  -7   3 10124.9 259.850  24
   1  -7   3 9795.75 443.688  23
   1  -7   3 9998.41 426.084   3
   1  -7   3 9623.91 259.505  12
   1  -7   3 9612.96 242.288  32
   1  -7   3 10154.2 243.142  34
   1  -7   3 9818.67 248.317  41
   1  -7   3 9810.90 238.440  30
   1  -7   3 10100.7 248.970  42
   1  -7   4 313.877 33.3457  30
   1  -7   4 351.909 86.7039  23
   1  -7   4 271.538 36.3821  12
   1  -7   4 280.480 34.5554   5
   1  -7   4 259.434 32.1403  21
   1  -7   4 277.928 28.7445  32
   1  -7   4 275.392 28.1395  33
   1  -7   4 274.221 32.3702  38
   1  -7   4 257.851 29.4216  39
   1  -7   4 229.482 25.0758  36
   1  -7   4 273.343 34.0499  42
   1  -7   4 232.087 69.5237   3
   1  -7   4 224.238 29.9778  34
   1  -7   4 293.748 35.3271  24
   1  -7   5 2406.96 101.011  24
   1  -7   5 2349.93 88.8115  33
   1  -7   5 2403.24 87.2982  36
   1  -7   5 2383.31 93.4357  39
   1  -7   5 2316.96 100.108   5
   1  -7   5 2583.28 97.1956  30
   1  -7   5 2494.09 96.0870  42
   1  -7   5 2273.16 96.2622  38
   1  -7   5 2457.95 95.4622  34
   1  -7   5 2450.99 104.883  12
   1  -7   5 2462.17 197.430   3
   1  -7   5 2531.28 101.047  21
   1  -7   6 1146.43 69.2390  12
   1  -7   6 1058.84 66.7901  17
   1  -7   6 1251.97 136.760   3
   1  -7   6 1257.01 67.8513  24
   1  -7   6 1215.50 62.5978  33
   1  -7   6 1263.46 67.9630  30
   1  -7   6 1138.66 63.6775  34
   1  -7   6 1196.00 62.1705  42
   1  -7   6 1211.41 64.6699  39
   1  -7   6 1267.09 62.5736  36
   1  -7   7 16612.8 376.810  33
   1  -7   7 17189.7 391.490  30
   1  -7   7 16304.1 393.099  12
   1  -7   7 16850.7 378.162  36
   1  -7   7 17477.3 384.963  39
   1  -7   7 16480.6 382.821  34
   1  -7   7 16924.4 396.405  17
   1  -7   8 3228.90 105.297  35
   1  -7   8 3256.15 114.511  36
   1  -7   8 3144.30 122.619  30
   1  -7   8 3573.12 123.443  34
   1  -7   8 3298.50 128.785  17
   1  -7   8 3353.82 118.196  39
   1  -7   8 2925.22 110.031  33
   1  -7   8 3116.08 118.998  12
   1  -7   9 1087.96 68.7379  30
   1  -7   9 1040.79 59.2078  33
   1  -7   9 1013.60 53.6814  35
   1  -7   9 984.832 63.4681  34
   1  -7   9 1000.57 60.6938  39
   1  -7   9 1051.51 62.5956  36
   1  -7   9 944.085 68.1044  17
   1  -7  10 1932.76 86.6564  39
   1  -7  10 1896.60 86.4307  34
   1  -7  10 1860.28 91.1501  30
   1  -7  10 1760.36 91.5075  17
   1  -7  10 1782.63 79.2913  33
   1  -7  10 1815.97 84.4401  36
   1  -7  11 16407.9 376.682  33
   1  -7  11 17414.3 388.023  34
   1  -7  11 17460.4 388.090  39
   1  -7  11 16650.7 394.913  30
   1  -7  12 244.173 34.8802  34
   1  -7  12 295.975 32.2678  29
   1  -7  12 325.371 45.8829  30
   1  -7  12 281.941 35.1658  39
   1  -7  13 2873.58 108.503  30
   1  -7  13 2990.95 109.053  20
   1  -7  13 3236.23 102.737  29
   1  -7  13 3113.90 106.271  39
   1  -7  13 3219.64 106.781  34
   1  -7  14 356.639 31.7256  34
   1  -7  14 303.326 30.4304  39
   1  -7  14 341.818 34.0358  20
   1  -7  14 296.436 27.8233  29
   1  -7  14 341.526 34.6898  30
   1  -7  15 8081.59 184.626  29
   1  -7  15 7943.37 187.656  39
   1  -7  15 8049.59 187.039  34
   1  -7  15 8165.14 192.969  30
   1  -7  15 7853.65 191.863  20
   1  -6 -19 92.5360 15.0090  32
  -1   6  19 92.5520 13.1031  13
   1  -6 -19 102.896 18.3449  26
   1  -6 -19 104.843 19.7215  25
  -1   6  18 6846.31 171.523  13
   1  -6 -18 7211.77 181.937  32
   1  -6 -18 7128.93 188.357  25
   1  -6 -17 218.065 31.7778  32
   1  -6 -17 224.098 25.5524  38
   1  -6 -17 261.946 32.6285   2
  -1   6  17 232.754 26.7801  13
   1  -6 -17 257.341 39.2270  25
   1  -6 -16-3.23744 24.0010   2
  -1   6  16 3.51854 17.3666  13
   1  -6 -16 44.1810 20.1567  38
   1  -6 -15 521.085 47.2199  38
  -1   6  15 571.428 46.3258  13
   1  -6 -15 472.899 47.4625   2
   1  -6 -14 8772.73 241.693   2
   1  -6 -14 8894.30 245.357  38
   1  -6 -14 8541.00 442.173   1
  -1   6  14 8942.40 237.332  13
   1  -6 -13 9557.98 462.297   1
   1  -6 -13 9083.89 236.943   9
   1  -6 -13 8818.16 241.847   2
   1  -6 -13 9075.83 250.694  38
  -1   6  13 9034.91 240.338  13
   1  -6 -12 6478.52 191.627   2
   1  -6 -12 6605.11 186.065   9
   1  -6 -12 6407.79 198.751  38
   1  -6 -12 6523.35 196.111  41
   1  -6 -12 7159.25 384.974   1
  -1   6  12 6633.70 190.457  13
   1  -6 -11 2522.41 97.4047   9
   1  -6 -11 2600.20 221.253   1
  -1   6  11 2488.61 98.3266  13
   1  -6 -11 2646.18 113.120  22
   1  -6 -11 2632.23 102.076   2
   1  -6 -11 2488.31 108.623  38
   1  -6 -11 2415.86 107.546  41
   1  -6 -10 426.463 44.4447  38
   1  -6 -10 365.370 36.6267   2
   1  -6 -10 358.286 41.4540  22
   1  -6 -10 369.542 34.1077   9
   1  -6 -10 305.340 78.5626   1
   1  -6 -10 336.688 39.1890  41
   1  -6  -9 391.908 32.5150  42
   1  -6  -9 373.996 42.0959  41
   1  -6  -9 361.919 72.9250   3
   1  -6  -9 406.915 42.6218  38
   1  -6  -9 350.716 33.3944   2
   1  -6  -9 353.514 32.0191   9
   1  -6  -9 396.700 43.7712  22
   1  -6  -9 269.209 75.7707   1
   1  -6  -8 1424.95 72.0634  24
   1  -6  -8 1355.29 75.2505  41
   1  -6  -8 1390.96 62.9617   2
   1  -6  -8 1414.65 139.634   1
   1  -6  -8 1290.99 74.1602  22
   1  -6  -8 1360.66 66.3199   5
   1  -6  -8 1233.63 128.259   3
   1  -6  -8 1308.56 70.8809  38
   1  -6  -8 1272.50 62.6489  21
   1  -6  -8 1410.64 64.6293  42
   1  -6  -7 4347.62 243.305   3
   1  -6  -7 4059.12 259.003  23
   1  -6  -7 4150.70 139.957  24
   1  -6  -7 4260.23 236.255   1
   1  -6  -7 4315.83 130.859  21
   1  -6  -7 4203.00 131.980   5
   1  -6  -7 4372.51 145.585  41
   1  -6  -7 4351.50 130.150  42
   1  -6  -7 4277.51 147.232  22
   1  -6  -7 4545.74 125.456   2
   1  -6  -7 4177.07 139.854  38
   1  -6  -7 4173.55 133.519  34
   1  -6  -6 19117.6 565.197   1
   1  -6  -6 18439.8 625.082  23
   1  -6  -6 20328.1 403.602   2
   1  -6  -6 17437.5 423.270  19
   1  -6  -6 17963.8 424.636  38
   1  -6  -6 19973.2 415.844  42
   1  -6  -6 19334.9 435.164  41
   1  -6  -6 18857.0 428.856  24
   1  -6  -6 20144.9 440.293  22
   1  -6  -6 19334.9 416.322  34
   1  -6  -6 19971.2 599.713   3
   1  -6  -6 18557.9 415.946   5
   1  -6  -5 774.896 88.6109   1
   1  -6  -5 751.081 51.9023  41
   1  -6  -5 755.772 52.7771  22
   1  -6  -5 896.031 119.687  23
   1  -6  -5 813.954 51.1653  48
   1  -6  -5 726.984 46.1254  32
   1  -6  -5 756.429 98.0461   3
   1  -6  -5 764.358 51.5299  43
   1  -6  -5 751.347 38.1753   2
   1  -6  -5 764.016 46.1218  42
   1  -6  -5 928.851 53.8788  19
   1  -6  -5 773.927 118.168  44
   1  -6  -5 777.787 49.5096  38
   1  -6  -4 34066.6 715.805  43
   1  -6  -4 34437.1 714.536  48
   1  -6  -4 32953.6 700.902  49
   1  -6  -4 34142.0 941.465  23
   1  -6  -4 34950.3 956.295  44
   1  -6  -4 35576.4 704.515  42
   1  -6  -4 35478.2 903.241   3
   1  -6  -4 36797.0 840.897   1
   1  -6  -4 35610.9 683.300   2
   1  -6  -3 25634.2 540.023  42
   1  -6  -3 25760.2 721.842   3
   1  -6  -3 27397.0 557.190  43
   1  -6  -3 25283.5 762.514  23
   1  -6  -3 25819.8 552.853  48
   1  -6  -3 26065.5 542.278  49
   1  -6  -3 26138.8 644.899   1
   1  -6  -3 27398.7 788.821  44
   1  -6  -2 37069.7 781.962  49
   1  -6  -2 38636.5 797.359  43
   1  -6  -2 41169.6 877.938   1
   1  -6  -2 41813.1 993.693   3
   1  -6  -2 40702.0 799.660  48
   1  -6  -2 39227.0 784.098  42
   1  -6  -2 42242.4 1056.69  44
   1  -6  -2 39536.6 1031.88  23
   1  -6  -1 26488.2 778.130  44
   1  -6  -1 25711.9 539.561  49
   1  -6  -1 26082.7 763.620  23
   1  -6  -1 27267.2 730.676   3
   1  -6  -1 26550.6 600.558   1
   1  -6  -1 26185.7 553.258  43
   1  -6  -1 25220.0 549.973  48
   1  -6  -1 26737.7 541.165  42
   1  -6   0 2632.63 202.089  44
   1  -6   0 2567.77 97.9341  48
   1  -6   0 2723.16 92.2350  42
   1  -6   0 2693.22 92.8455  49
   1  -6   0 2660.13 99.4318  43
   1  -6   0 2470.36 173.715   3
   1  -6   0 2497.25 192.167  23
   1  -6   1 129557. 2482.69  48
   1  -6   1 128608. 2483.33  43
   1  -6   1 131552. 2469.93  42
   1  -6   1 130794. 2743.35  23
   1  -6   1 132698. 2766.84  44
   1  -6   1 131936. 2471.35  49
   1  -6   2 23769.6 496.481  42
   1  -6   2 23510.5 508.033  48
   1  -6   2 22911.1 506.510  43
   1  -6   2 23288.0 675.336   3
   1  -6   2 24420.9 715.665  23
   1  -6   2 23279.3 718.530  44
   1  -6   2 24496.9 493.345  34
   1  -6   3 90.8655 47.1543  44
   1  -6   3 137.944 23.5603  43
   1  -6   3 148.532 21.8967  42
   1  -6   3 201.980 23.6785  34
   1  -6   3 69.5484 40.7519   3
   1  -6   3 151.184 24.3663  12
   1  -6   3 173.154 23.3869  21
   1  -6   3 167.449 51.0777  23
   1  -6   4 16328.6 351.723  34
   1  -6   4 15892.5 363.591   5
   1  -6   4 16372.8 354.535  42
   1  -6   4 15602.3 349.332  33
   1  -6   4 15176.9 362.778  12
   1  -6   4 16008.2 358.944  38
   1  -6   4 15578.8 536.293  23
   1  -6   4 16083.2 345.050  36
   1  -6   4 15927.9 359.799  21
   1  -6   4 16174.5 350.800  39
   1  -6   4 16009.5 363.839  24
   1  -6   4 16431.8 527.950   3
   1  -6   4 16163.5 353.875  30
   1  -6   5 402.167 37.0022   5
   1  -6   5 395.105 33.5190  34
   1  -6   5 382.224 73.8049  23
   1  -6   5 400.524 33.1023  39
   1  -6   5 391.546 75.1789   3
   1  -6   5 389.406 35.2706  21
   1  -6   5 413.910 35.9655  30
   1  -6   5 391.338 34.8043  38
   1  -6   5 364.365 31.5690  33
   1  -6   5 448.520 36.5216  24
   1  -6   5 454.272 39.2373  12
   1  -6   5 417.198 34.1126  42
   1  -6   5 440.979 33.7606  36
   1  -6   5 391.420 32.6427  32
   1  -6   6 17.1892 34.7301   3
   1  -6   6 16.6727 11.3216  35
   1  -6   6 19.2490 15.3615  33
   1  -6   6 43.0264 16.4257  32
   1  -6   6 11.8497 12.9054  42
   1  -6   6-9.98988 16.1187  34
   1  -6   6 42.8344 18.6510  39
   1  -6   6 17.6930 14.2904  12
   1  -6   6 22.1200 15.2973  36
   1  -6   6 54.2667 19.8873  30
   1  -6   7 7.11024 19.0831  17
   1  -6   7 17.2687 14.4345  35
   1  -6   7 59.7209 22.1137  34
   1  -6   7 2.25121 15.5379  39
   1  -6   7 86.5584 26.2463  30
   1  -6   7-9.55894 14.1690  12
   1  -6   7 12.8022 15.2065  36
   1  -6   7 23.5520 14.3105   6
   1  -6   7 25.7896 18.1548  33
   1  -6   8 17838.9 401.006  34
   1  -6   8 17388.9 389.383   6
   1  -6   8 17721.3 401.335  33
   1  -6   8 18218.8 399.479  39
   1  -6   8 18633.7 403.504  36
   1  -6   8 17855.9 410.866  30
   1  -6   8 18040.4 418.686  17
   1  -6   8 17866.9 391.459  35
   1  -6   9 530.034 43.9643  39
   1  -6   9 579.517 50.5884  17
   1  -6   9 424.225 45.1337  30
   1  -6   9 434.602 38.0238  35
   1  -6   9 438.676 36.5646   6
   1  -6   9 447.492 41.5221  34
   1  -6   9 430.437 42.0824  33
   1  -6   9 502.811 45.2352  36
   1  -6  10 11394.9 282.102  36
   1  -6  10 11491.5 278.179  39
   1  -6  10 11012.1 288.338  30
   1  -6  10 11556.5 272.090  35
   1  -6  10 11278.5 279.900  33
   1  -6  10 10986.1 278.087  34
   1  -6  10 10668.0 289.158  17
   1  -6  10 11004.8 268.339   6
   1  -6  11 5188.66 156.343  39
   1  -6  11 4973.55 156.005  33
   1  -6  11 4676.64 163.156  30
   1  -6  11 4848.91 154.117  34
   1  -6  11 5077.06 150.413  35
   1  -6  11 4957.48 147.154   6
   1  -6  11 4930.21 158.372  36
   1  -6  12 1896.93 95.4177  30
   1  -6  12 2219.54 93.1696  39
   1  -6  12 2001.78 89.9586  34
   1  -6  12 2144.65 84.9926   6
   1  -6  12 2110.95 90.7565  33
   1  -6  13 45.7857 30.5993  30
   1  -6  13 38.6726 19.5239   6
   1  -6  13 5.19876 24.4740  34
   1  -6  13-9.56216 23.9952  39
   1  -6  14 263.053 37.6749  30
   1  -6  14 278.268 33.5887  34
   1  -6  14 271.670 32.6908  39
   1  -6  15 520.564 37.8360  34
   1  -6  15 605.857 40.8233  29
   1  -6  15 496.985 42.3699  30
   1  -6  15 581.098 42.4105  20
   1  -6  15 557.271 39.2753  39
   1  -6  16 7241.34 177.040  20
   1  -6  16 7364.37 173.137  34
   1  -6  16 7256.93 181.053  30
   1  -6  16 7305.44 175.563  29
   1  -6  16 7238.81 176.347  39
   1  -5 -19 100.069 17.5634  32
  -1   5  19 93.7249 18.6447  13
   1  -5 -19 122.285 22.2325  25
  -1   5  18 393.693 35.4762  13
   1  -5 -18 409.041 35.0497  32
   1  -5 -18 438.174 41.6504  25
   1  -5 -17 1610.87 79.1034   2
  -1   5  17 1497.91 75.0401  13
   1  -5 -16 390.169 44.3867   2
   1  -5 -16 352.955 36.6337  38
  -1   5  16 392.260 41.5852  13
   1  -5 -15 2235.68 97.9051  38
   1  -5 -15 2224.81 102.929   2
  -1   5  15 2165.32 99.5421  13
   1  -5 -15 2226.31 216.355   1
   1  -5 -15 2442.96 103.521   9
   1  -5 -14 1168.05 70.6313  38
   1  -5 -14 1289.46 168.300   1
   1  -5 -14 1396.28 79.4357   2
   1  -5 -14 1305.69 75.7238   9
  -1   5  14 1337.85 75.9869  13
  -1   5  13 135.591 30.6979  13
   1  -5 -13 138.838 30.8023   9
   1  -5 -13 119.264 28.6741  38
   1  -5 -13 202.037 81.3824   1
   1  -5 -13 115.247 32.3576   2
   1  -5 -12 5018.95 164.704  38
   1  -5 -12 5363.75 164.015   2
   1  -5 -12 5003.39 159.840   9
   1  -5 -12 4986.72 316.830   1
  -1   5  12 5069.13 159.982  13
   1  -5 -11 5223.83 166.416  38
   1  -5 -11 5672.11 321.808   1
  -1   5  11 5199.10 159.202  13
   1  -5 -11 5377.84 159.882   2
   1  -5 -11 5105.58 158.283   9
   1  -5 -10 1153.39 65.7081  22
  -1   5  10 1058.54 59.6140  13
   1  -5 -10 1035.69 63.5663  38
   1  -5 -10 1199.68 62.7812   2
   1  -5 -10 1066.75 59.5838   9
   1  -5 -10 1117.73 133.059   1
   1  -5 -10 1108.58 63.8962  41
   1  -5  -9 5122.16 156.504  41
   1  -5  -9 4718.04 152.222  38
   1  -5  -9 5057.44 157.468  22
   1  -5  -9 4708.59 143.054   9
   1  -5  -9 5007.73 274.526   1
   1  -5  -9 5125.67 145.205   2
   1  -5  -9 5315.66 244.134   3
   1  -5  -8 8505.29 206.855   2
   1  -5  -8 8375.69 224.853  22
   1  -5  -8 8262.40 221.772  41
   1  -5  -8 8719.93 204.453  42
   1  -5  -8 8815.95 332.294   3
   1  -5  -8 8195.86 219.106  38
   1  -5  -8 8398.04 350.750   1
   1  -5  -7 60613.2 1274.06   3
   1  -5  -7 58722.0 1301.07  23
   1  -5  -7 55948.9 1077.77  42
   1  -5  -7 60255.8 1293.77   1
   1  -5  -6 338.718 59.3838   3
   1  -5  -6 268.713 63.2255  23
   1  -5  -6 376.219 28.5413  42
   1  -5  -6 420.562 69.6077   1
   1  -5  -6 370.031 26.9848   2
   1  -5  -5 10944.8 357.998   1
   1  -5  -5 10563.9 394.161  44
   1  -5  -5 10808.5 245.409  42
   1  -5  -5 11073.6 254.555  43
   1  -5  -5 10852.7 237.562   2
   1  -5  -5 10928.0 252.084  48
   1  -5  -5 10676.8 369.189   3
   1  -5  -5 10210.3 385.148  23
   1  -5  -5 10730.2 245.178  49
   1  -5  -4 5802.83 275.636  23
   1  -5  -4 6558.41 291.944  44
   1  -5  -4 6764.04 169.912  43
   1  -5  -4 6426.99 161.644  49
   1  -5  -4 6724.70 169.272  48
   1  -5  -4 6315.11 265.511   3
   1  -5  -4 6221.85 240.955   1
   1  -5  -4 6514.45 161.532  42
   1  -5  -4 6371.85 151.059   2
   1  -5  -3 57006.3 1308.97  23
   1  -5  -3 57509.3 1107.18  49
   1  -5  -3 57263.1 1212.29   1
   1  -5  -3 59447.4 1116.54  48
   1  -5  -3 57485.7 1116.05  43
   1  -5  -3 58300.6 1273.91   3
   1  -5  -3 53846.4 1104.67  42
   1  -5  -2 17302.6 371.349  42
   1  -5  -2 17782.5 379.589  48
   1  -5  -2 15973.5 521.197  23
   1  -5  -2 19271.3 553.617  44
   1  -5  -2 17335.7 504.922   3
   1  -5  -2 17082.9 370.162  49
   1  -5  -2 17619.3 443.941   1
   1  -5  -2 18856.8 382.893  43
   1  -5  -1 359.632 29.7763  48
   1  -5  -1 315.988 66.2394  44
   1  -5  -1 357.226 27.4551  42
   1  -5  -1 342.888 29.5034  43
   1  -5  -1 387.332 42.1940   1
   1  -5  -1 369.748 27.8837  49
   1  -5  -1 346.453 65.0977  23
   1  -5  -1 448.403 70.0837   3
   1  -5   0 883.293 46.6360  48
   1  -5   0 804.261 55.1406   1
   1  -5   0 817.332 97.5977  44
   1  -5   0 792.448 87.5831   3
   1  -5   0 854.972 42.6328  49
   1  -5   0 868.021 47.0174  43
   1  -5   0 930.165 44.3744  42
   1  -5   0 922.865 103.062  23
   1  -5   1 13085.0 440.979  23
   1  -5   1 14585.9 300.870  42
   1  -5   1 13905.8 462.207  44
   1  -5   1 13393.7 305.611  48
   1  -5   1 14005.2 299.639  49
   1  -5   1 13610.9 306.990  43
   1  -5   1 13342.6 303.273   1
   1  -5   1 13906.6 428.408   3
   1  -5   2 61.5932 16.7065  43
   1  -5   2 7.27237 27.8911   3
   1  -5   2 62.7943 15.2903  48
   1  -5   2 72.8632 41.2258  44
   1  -5   2 23.8732 30.9219  23
   1  -5   2 55.1694 14.8424  42
   1  -5   2 57.0162 14.9317  49
   1  -5   3 8376.70 205.995  48
   1  -5   3 8704.26 200.950  49
   1  -5   3 8517.82 314.070   3
   1  -5   3 8594.09 199.721  42
   1  -5   3 8161.64 324.950  23
   1  -5   3 8094.99 206.363  43
   1  -5   3 7950.38 334.164  44
   1  -5   4 24408.3 501.287  42
   1  -5   4 24756.1 672.314  23
   1  -5   4 24952.8 656.384   3
   1  -5   5 675.893 84.0156   3
   1  -5   5 798.944 42.1507  42
   1  -5   5 824.066 45.0876  30
   1  -5   5 697.460 41.0504  34
   1  -5   5 696.350 88.5669  23
   1  -5   6 4438.84 130.239  34
   1  -5   6 4488.49 126.714  42
   1  -5   6 4550.59 226.201   3
   1  -5   6 4643.65 135.935  33
   1  -5   6 4890.83 132.831  36
   1  -5   6 4459.73 135.227  30
   1  -5   7 10881.4 253.150   6
   1  -5   7 11488.8 263.492  36
   1  -5   7 10928.0 274.502  17
   1  -5   7 11517.0 269.592  30
   1  -5   7 11048.7 387.619   3
   1  -5   7 10521.8 259.628  34
   1  -5   7 11389.1 267.768  33
   1  -5   7 10818.7 254.957  35
   1  -5   8 143.463 23.4142  35
   1  -5   8 104.549 19.1617   6
   1  -5   8 106.958 21.4648  17
   1  -5   8 106.029 24.2785  34
   1  -5   8 101.293 21.9857  33
   1  -5   8 131.318 27.2712  30
   1  -5   8 126.290 23.0990  36
   1  -5   9 35093.7 760.502  30
   1  -5   9 37413.0 770.604  17
   1  -5   9 38431.4 750.254  35
   1  -5   9 37074.2 746.240   6
   1  -5   9 37042.4 761.408  33
   1  -5   9 37190.8 754.437  34
   1  -5   9 35018.2 752.254  36
   1  -5  10 407.334 43.6801  17
   1  -5  10 501.126 41.0421   6
   1  -5  10 401.471 45.2932  30
   1  -5  10 487.854 43.3877  33
   1  -5  10 446.547 43.4020  36
   1  -5  10 457.002 42.8003  34
   1  -5  10 494.006 41.8940  35
   1  -5  11 14500.5 334.372  36
   1  -5  11 13021.2 334.669  30
   1  -5  11 12880.9 320.957  34
   1  -5  11 13070.7 319.702  35
   1  -5  11 14229.7 336.854  17
   1  -5  11 13104.2 330.853  33
   1  -5  11 14307.9 321.775   6
   1  -5  12 3559.86 139.353  30
   1  -5  12 3748.56 131.321  34
   1  -5  12 3647.58 135.134  33
   1  -5  12 3841.99 126.723   6
   1  -5  12 3734.40 128.760  35
   1  -5  13 5974.17 190.638  30
   1  -5  13 6268.68 180.570  34
   1  -5  13 6324.02 180.388  35
   1  -5  13 6195.04 175.503   6
   1  -5  14 90.1871 33.1521  30
   1  -5  14 89.2824 25.5556   6
   1  -5  14 47.1734 22.2741  34
   1  -5  15 2880.82 102.240  39
   1  -5  15 2695.30 108.210  30
   1  -5  15 2871.26 98.2853   6
   1  -5  15 2713.26 98.2588  34
   1  -5  16 833.794 45.8836  34
   1  -5  16 898.474 50.6021  39
   1  -5  16 826.566 51.0518  30
   1  -5  16 840.675 46.0961   6
   1  -5  17 134.026 18.1249  20
   1  -5  17 123.461 19.7348  29
   1  -5  17 96.4181 17.0049  30
   1  -5  17 110.761 19.7362  39
   1  -5  17 137.173 18.0705  34
  -1   4  19 837.301 48.8188  13
  -1   4  19 969.300 45.1508   6
   1  -4 -19 858.664 43.8047  32
   1  -4 -19 903.663 49.3281  25
  -1   4  18 299.326 36.0073  13
   1  -4 -18 315.663 35.5209  25
  -1   4  17 4061.57 141.387  13
   1  -4 -17 4138.29 140.745   2
   1  -4 -17 4267.57 145.414   9
   1  -4 -16 2941.49 118.337   2
  -1   4  16 3093.10 122.098  13
   1  -4 -16 3022.17 121.720   9
  -1   4  15 6135.11 190.010  13
   1  -4 -15 6059.99 178.988  38
   1  -4 -15 5961.40 190.501   9
   1  -4 -15 5791.61 362.087   1
   1  -4 -15 6173.75 189.574   2
   1  -4 -14 13164.0 324.018  38
   1  -4 -14 13484.7 331.867   2
  -1   4  14 13590.8 333.646  13
   1  -4 -14 12945.6 560.060   1
   1  -4 -14 13336.0 336.075   9
   1  -4 -13 2573.58 225.148   1
   1  -4 -13 2662.19 110.238   9
   1  -4 -13 2471.85 104.060  38
   1  -4 -13 2271.70 103.691   2
  -1   4  13 2536.56 106.861  13
  -1   4  12 27.0602 19.8764  13
   1  -4 -12 4.97684 20.1482   9
   1  -4 -12-11.7838 24.3149   2
   1  -4 -12 44.4455 65.0475   1
   1  -4 -11 2966.92 224.606   1
   1  -4 -11 2804.92 109.852   9
  -1   4  11 2868.73 107.696  13
   1  -4 -11 3245.29 112.132   2
   1  -4 -10 36375.0 750.567   9
   1  -4 -10 38018.5 991.036   1
   1  -4 -10 36496.4 744.662   2
  -1   4  10 37360.0 748.274  13
   1  -4  -9 2669.74 96.5347   9
   1  -4  -9 2759.51 193.974   1
   1  -4  -9 2759.23 95.2879   2
   1  -4  -8 10568.4 393.771   1
   1  -4  -8 11101.5 349.919   3
   1  -4  -8 10876.1 251.018   2
   1  -4  -7 6151.01 264.134   1
   1  -4  -7 5755.90 143.250  42
   1  -4  -7 5868.51 232.920   3
   1  -4  -7 5956.91 149.784   2
   1  -4  -6 27714.6 545.950  49
   1  -4  -6 27812.8 694.452   1
   1  -4  -6 26942.0 544.524  42
   1  -4  -6 27228.4 546.717   2
   1  -4  -6 27095.9 689.603  23
   1  -4  -6 27485.9 671.000   3
   1  -4  -5 1062.70 43.5144  42
   1  -4  -5 947.461 43.4918  48
   1  -4  -5 923.999 89.6626  44
   1  -4  -5 919.221 43.7998  43
   1  -4  -5 1003.86 41.8036   2
   1  -4  -5 1110.28 90.6724   3
   1  -4  -5 1007.42 43.0204  49
   1  -4  -5 917.123 85.0120   1
   1  -4  -5 884.134 88.2422  23
   1  -4  -4 1073.47 46.3674  48
   1  -4  -4 1023.34 94.7958  44
   1  -4  -4 1089.55 41.3580   2
   1  -4  -4 1054.92 46.7289  43
   1  -4  -4 986.948 93.3343  23
   1  -4  -4 1060.11 43.6363  49
   1  -4  -4 972.815 84.7158   3
   1  -4  -4 1031.14 43.7249  42
   1  -4  -4 1119.81 87.6171   1
   1  -4  -3 28163.4 698.329  44
   1  -4  -3 26503.8 684.647  23
   1  -4  -3 27523.0 556.031  43
   1  -4  -3 28362.1 556.810  48
   1  -4  -3 27691.6 669.609   3
   1  -4  -3 27990.8 673.993   4
   1  -4  -3 27830.8 642.677   1
   1  -4  -3 27526.1 550.020  42
   1  -4  -3 27760.2 550.562  49
   1  -4  -2 32338.7 770.532   4
   1  -4  -2 30996.8 647.805  42
   1  -4  -2 33130.3 724.683   1
   1  -4  -2 33011.1 649.578  49
   1  -4  -2 32323.2 787.705  23
   1  -4  -2 32273.2 764.642   3
   1  -4  -2 34180.7 655.798  48
   1  -4  -2 34757.4 656.693  43
   1  -4  -2 35977.4 810.269  44
   1  -4  -1 63757.0 1248.78  49
   1  -4  -1 67583.4 1416.74  44
   1  -4  -1 63729.7 1308.14   1
   1  -4  -1 69809.6 1258.43  48
   1  -4  -1 59352.3 1363.90   3
   1  -4  -1 66859.7 1405.96  23
   1  -4  -1 66150.6 1255.79  43
   1  -4  -1 64467.5 1248.63  42
   1  -4  -1 65275.3 1382.68   4
   1  -4   0 17486.6 369.709  48
   1  -4   0 16304.4 468.315   4
   1  -4   0 18147.2 476.198   3
   1  -4   0 17589.5 402.354   1
   1  -4   0 17674.4 491.928  23
   1  -4   0 17036.5 493.088  44
   1  -4   0 17311.7 369.521  43
   1  -4   0 18515.0 365.740  42
   1  -4   0 18323.7 366.220  49
   1  -4   1 77256.3 1428.34  42
   1  -4   1 75759.6 1428.45  49
   1  -4   1 75594.1 1568.29   4
   1  -4   1 76559.1 1435.35  43
   1  -4   1 73589.7 1433.75  48
   1  -4   1 72488.8 1446.88   1
   1  -4   1 73371.8 1554.98   3
   1  -4   1 76779.9 1584.57  23
   1  -4   2 2121.32 73.3750  43
   1  -4   2 2354.89 71.5547  49
   1  -4   2 2341.32 64.1113   1
   1  -4   2 2247.99 143.120  44
   1  -4   2 2524.56 72.6170  42
   1  -4   2 2159.54 73.6222  48
   1  -4   2 2428.06 134.786   3
   1  -4   2 2148.53 135.673  23
   1  -4   3 15.2560 22.1323   3
   1  -4   3 25.8360 11.0888  48
   1  -4   3 2.44452 25.9205  44
   1  -4   3 25.3283 10.3167  43
   1  -4   3 10.1925 24.7504  23
   1  -4   3 22.4813 9.13579  42
   1  -4   3 20.2540 8.46606  49
   1  -4   4 3215.03 177.379  44
   1  -4   4 3180.46 160.311   3
   1  -4   4 3435.31 174.188  23
   1  -4   4 3361.49 93.0695  42
   1  -4   4 3358.60 93.0407  49
   1  -4   4 3385.25 98.5693  43
   1  -4   5 11808.8 364.698  23
   1  -4   5 11520.2 350.632   3
   1  -4   5 11980.9 382.498  47
   1  -4   5 11157.8 245.710  42
   1  -4   6 3297.15 166.163   3
   1  -4   6 3330.44 94.0420  42
   1  -4   6 3338.45 188.007  47
   1  -4   7 12594.4 434.176  47
   1  -4   7 12675.2 292.746  30
   1  -4   7 13281.6 394.376   3
   1  -4   7 12755.8 288.411  36
   1  -4   8 53011.6 1049.65  30
   1  -4   8 53202.1 1043.28  36
   1  -4   8 52787.6 1039.35   7
   1  -4   8 52391.4 1051.19  33
   1  -4   8 52636.2 1038.85  35
   1  -4   8 52355.6 1054.86  17
   1  -4   9 5261.38 158.824  30
   1  -4   9 5267.66 150.217   7
   1  -4   9 5474.99 151.612  35
   1  -4   9 5760.03 290.454  47
   1  -4   9 5282.81 159.580  33
   1  -4   9 5064.04 157.294  17
   1  -4   9 5132.38 152.280  36
   1  -4  10 6071.11 177.646  33
   1  -4  10 5635.92 173.834  30
   1  -4  10 5575.37 170.122  17
   1  -4  10 5899.28 170.306  36
   1  -4  10 6010.93 167.002   7
   1  -4  10 5860.13 166.465  35
   1  -4  11 41.5322 24.6497  30
   1  -4  11 46.1227 22.9625  35
   1  -4  11 33.6254 26.8589  36
   1  -4  11 57.0637 47.8187  47
   1  -4  11 75.3461 27.9163  33
   1  -4  12 40838.8 1076.31  47
   1  -4  12 39554.6 805.333  34
   1  -4  12 38535.1 820.466  30
   1  -4  12 39916.9 820.769  33
   1  -4  12 40283.4 803.809   6
   1  -4  12 39839.3 804.748  35
   1  -4  13 1240.65 70.4750  34
   1  -4  13 1188.29 76.3183  30
   1  -4  13 1269.13 70.7867  35
   1  -4  13 1145.83 71.8965  36
   1  -4  13 1247.90 69.6589   6
   1  -4  14 122.804 30.3838   6
   1  -4  14 131.215 33.3038  35
   1  -4  14 133.857 34.7913  30
   1  -4  14 111.443 28.9696  34
   1  -4  15-2.43526 22.5521   6
   1  -4  15-8.92303 26.1140  30
   1  -4  15 21.1693 23.6013  34
   1  -4  16 2927.38 101.843  34
   1  -4  16 2993.74 103.842   6
   1  -4  16 2995.87 110.670  30
   1  -4  17 32.6855 15.7806  34
   1  -4  17 38.3522 16.5269  30
   1  -4  17 18.5542 15.1603   6
   1  -4  18 56.9711 12.6209  34
   1  -4  18 64.1252 16.4577  29
   1  -4  18 58.4497 14.4119   6
   1  -4  18 47.4468 16.1074  39
   1  -4  18 54.6049 11.0314  30
   1  -4  18 53.5374 12.4018  20
  -1   3  19 5496.36 157.492  13
   1  -3 -19 5660.28 148.567  25
  -1   3  19 5494.47 149.627   6
   1  -3 -18 374.532 36.7870  25
  -1   3  18 415.075 43.1537  13
  -1   3  17 13213.6 324.037  13
   1  -3 -17 13252.5 328.154   9
   1  -3 -17 12857.2 319.784   2
  -1   3  16 979.080 69.4494  13
   1  -3 -16 916.319 65.0024   2
   1  -3 -16 873.549 66.3440   9
  -1   3  15 654.944 106.393  47
   1  -3 -15 603.759 53.0454   2
   1  -3 -15 584.813 114.603   1
   1  -3 -15 583.353 56.3068   9
  -1   3  15 526.259 52.1918  13
  -1   3  14 2307.81 103.874  13
   1  -3 -14 2002.96 101.458   9
   1  -3 -14 2133.57 207.429   1
   1  -3 -14 2518.90 105.813   2
   1  -3 -13 13617.3 553.382   1
  -1   3  13 13594.6 332.298  13
   1  -3 -13 13265.2 336.042   9
   1  -3 -13 14107.1 333.615   2
   1  -3 -12 4049.11 136.215   2
   1  -3 -12 4362.78 281.862   1
  -1   3  12 4022.00 136.150  13
   1  -3 -12 4109.79 140.377   9
   1  -3 -11 7019.22 189.414   2
  -1   3  11 6818.08 189.730  13
   1  -3 -11 6946.73 194.906   9
   1  -3 -11 6913.39 341.520   1
   1  -3 -10 5071.96 274.731   1
   1  -3 -10 5287.37 149.346   2
  -1   3  10 5256.90 150.815  13
   1  -3 -10 4967.40 151.361   9
   1  -3  -9 1654.79 68.0642   2
   1  -3  -9 1580.43 140.048   1
   1  -3  -8 438.325 31.7364   2
   1  -3  -8 413.493 49.0500   3
   1  -3  -8 508.088 77.3778   1
   1  -3  -7 14028.7 432.428   1
   1  -3  -7 14208.8 376.856   3
   1  -3  -7 13964.4 302.028   2
   1  -3  -6 830.288 38.6427   2
   1  -3  -6 824.381 81.8378   1
   1  -3  -6 791.963 67.0499   3
   1  -3  -5 485.654 26.7332   2
   1  -3  -5 335.110 48.5838  23
   1  -3  -5 348.729 43.8795   3
   1  -3  -5 346.924 45.4604   4
   1  -3  -5 323.023 51.7233   1
   1  -3  -4 7227.86 237.136   1
   1  -3  -4 6926.34 225.553   3
   1  -3  -4 6588.48 232.721  23
   1  -3  -4 7116.64 239.535  44
   1  -3  -4 6877.59 226.409   4
   1  -3  -3 52646.2 1145.09   1
   1  -3  -3 58314.0 1184.42  44
   1  -3  -3 54303.3 1158.26   3
   1  -3  -3 57576.3 1177.53  23
   1  -3  -3 56623.2 1160.99   4
   1  -3  -2 847.223 61.7594   1
   1  -3  -2 842.363 67.5427   3
   1  -3  -2 793.288 65.3989   4
   1  -3  -2 778.484 69.4699  23
   1  -3  -2 802.219 72.4320  44
   1  -3  -1 9872.03 299.246  44
   1  -3  -1 9990.86 254.975   1
   1  -3  -1 9342.93 279.776   3
   1  -3   0 57.1396 15.7561   1
   1  -3   0 22.4296 18.1065   3
   1  -3   0 47.1244 23.3551  44
   1  -3   1 122257. 2451.75  23
   1  -3   1 126613. 2440.06   3
   1  -3   1 126828. 2445.36   4
   1  -3   1 126908. 2365.07   1
   1  -3   2 232.188 38.3356   4
   1  -3   2 298.004 22.0216   1
   1  -3   2 308.709 44.0367  23
   1  -3   2 322.008 42.6841   3
   1  -3   2 261.050 42.9302  44
   1  -3   3 14499.7 384.894  23
   1  -3   3 14072.0 382.424  47
   1  -3   3 14309.5 392.229  44
   1  -3   3 13432.4 370.908   4
   1  -3   3 14477.6 375.252   3
   1  -3   4 53855.1 1128.74  23
   1  -3   4 53552.2 1145.99  47
   1  -3   4 52924.4 1111.72   3
   1  -3   5 15589.8 407.274  23
   1  -3   5 15275.6 396.322   3
   1  -3   5 16186.7 445.952  47
   1  -3   6 877.179 69.7968   3
   1  -3   6 868.716 89.7828  47
   1  -3   7 9009.92 332.829  47
   1  -3   7 8691.95 269.098   3
   1  -3   8 9769.25 362.002  47
   1  -3   8 8841.26 215.779  36
   1  -3   9 10443.7 238.838  35
   1  -3   9 10304.9 394.643  47
   1  -3   9 10248.3 239.673   7
   1  -3   9 9636.30 244.835  33
   1  -3   9 9706.09 244.113  30
   1  -3   9 9881.10 238.845  36
   1  -3  10 2365.40 89.9245  35
   1  -3  10 2303.23 83.2953  13
   1  -3  10 2308.86 95.6346  30
   1  -3  10 2476.27 188.940  47
   1  -3  10 2408.03 91.8476   7
   1  -3  10 2289.80 91.2698  36
   1  -3  10 2315.08 95.5666  33
   1  -3  10 2253.75 87.2201  17
   1  -3  11 9894.31 421.050  47
   1  -3  11 9696.03 256.593  33
   1  -3  11 9466.32 256.266  30
   1  -3  11 9321.40 247.587  36
   1  -3  11 10070.9 238.860  13
   1  -3  11 9883.53 247.066  35
   1  -3  11 10183.9 250.968   7
   1  -3  12 561.940 52.2795  30
   1  -3  12 578.706 51.3001  33
   1  -3  12 607.249 108.310  47
   1  -3  12 676.524 44.6772  13
   1  -3  12 676.656 50.1247  35
   1  -3  12 697.846 53.1225  36
   1  -3  12 582.992 49.5693   7
   1  -3  13 3248.41 112.104  13
  -1   3 -13 3223.38 114.128   9
   1  -3  13 3278.27 122.720  35
   1  -3  13 3307.87 132.148  30
   1  -3  13 3495.58 251.447  47
   1  -3  13 3541.66 131.029  36
   1  -3  14 2146.18 87.4513  13
   1  -3  14 2162.14 98.1776  35
  -1   3 -14 2267.99 89.2197   9
   1  -3  14 2184.59 198.968  47
   1  -3  14 2222.03 104.158  36
   1  -3  14 2101.13 101.158  30
   1  -3  15 250.370 34.9393  34
   1  -3  15 297.316 38.4505  30
   1  -3  15 273.225 38.0042   6
   1  -3  15 232.925 63.9070  47
   1  -3  15 256.013 30.3189  13
  -1   3 -15 290.039 31.3214   9
   1  -3  15 295.912 43.4169  35
   1  -3  16 762.324 51.6822  34
   1  -3  16 764.961 46.0376  13
   1  -3  16 703.388 50.0643  30
  -1   3 -16 821.297 47.7751   9
   1  -3  16 720.207 53.5744   6
  -1   3 -17 13474.7 287.354   9
   1  -3  17 13185.5 303.831   6
   1  -3  17 12556.1 296.119  30
   1  -3  17 12932.7 297.059  34
   1  -3  18 60.8029 15.2820  34
   1  -3  18 78.9574 14.2801  30
  -1   2  19 5323.34 153.069  13
  -1   2  19 5319.79 147.881   6
   1  -2 -18 4863.66 139.209  25
  -1   2  18 4695.32 150.497  13
   1  -2 -17 3.74885 29.6828   9
  -1   2  17-11.9917 27.6670  13
   1  -2 -17 50.3001 23.2768   2
   1  -2 -16 4872.75 167.622   9
   1  -2 -16 5137.83 166.186   2
  -1   2  16 5050.25 166.981  13
  -1   2  15 192.413 36.2865  13
  -1   2  15 154.845 58.7598  47
   1  -2 -15 159.806 32.0340   2
   1  -2 -15 177.409 37.4391   9
  -1   2  14 6220.60 327.693  47
   1  -2 -14 5948.74 189.342   9
   1  -2 -14 6011.88 184.696   2
   1  -2 -14 5730.03 347.214   1
  -1   2  14 6358.31 189.428  13
  -1   2  13-5.02245 34.3214  47
   1  -2 -13 21.9706 39.2957   1
   1  -2 -13 58.9237 25.3439   2
   1  -2 -13 20.2200 22.5877   9
  -1   2  13-6.10953 23.7640  13
   1  -2 -12 4296.00 137.759   2
   1  -2 -12 4197.47 141.314   9
  -1   2  12 4091.13 137.012  13
   1  -2 -12 4446.73 276.312   1
   1  -2 -11 132.854 57.9844   1
  -1   2  11 138.178 25.0177  13
   1  -2 -11 142.741 26.5450   9
   1  -2 -11 138.650 24.6175   2
  -1   2  10 77776.1 1474.80  13
   1  -2 -10 75921.1 1475.97   9
   1  -2 -10 73249.6 1467.42   2
   1  -2  -9 321.067 28.3941   2
   1  -2  -9 352.687 66.2342   1
   1  -2  -8 89460.9 1688.44   2
   1  -2  -8 83457.4 1855.63   1
   1  -2  -7 4155.74 195.752   1
   1  -2  -7 4108.24 111.836   2
   1  -2  -7 4261.78 139.081   3
   1  -2  -6 49621.3 962.213   2
   1  -2  -6 51618.3 1014.75   3
   1  -2  -6 48303.4 1085.74   1
   1  -2  -5 3636.75 161.117   1
   1  -2  -5 3710.00 133.431   3
   1  -2  -5 3837.12 134.449   4
   1  -2  -4 49769.4 1033.88   3
   1  -2  -4 51664.2 1071.27   1
   1  -2  -4 52145.0 1048.89  23
   1  -2  -4 50929.0 1035.50   4
   1  -2  -3 207.395 31.8206   1
   1  -2  -3 160.158 26.0680   4
   1  -2  -3 177.286 28.7889  23
   1  -2  -3 140.135 24.4804   3
   1  -2  -2 64697.0 1321.61   3
   1  -2  -2 66998.6 1327.10   4
   1  -2  -2 66549.8 1335.77  44
   1  -2  -2 64796.9 1319.22   1
   1  -2  -1 13466.9 312.797   1
   1  -2  -1 14053.7 341.284  44
   1  -2   0 80498.8 1593.09   3
   1  -2   0 82743.9 1607.92  44
   1  -2   0 80790.0 1561.59   1
   1  -2   1 131973. 2495.67   4
   1  -2   1 130919. 2492.09   3
   1  -2   1 128726. 2503.05  44
   1  -2   1 125077. 2494.89  23
   1  -2   1 130657. 2484.58  47
   1  -2   2 173029. 3233.60   4
   1  -2   2 171011. 3244.11  44
   1  -2   2 165772. 3234.16  47
   1  -2   2 162764. 3224.07   3
   1  -2   2 175061. 3238.99  23
   1  -2   3 47696.1 978.761   3
   1  -2   3 47776.6 986.400  23
   1  -2   3 49427.2 1008.67  47
   1  -2   3 48129.9 985.334   4
   1  -2   4 34511.8 785.286  47
   1  -2   4 37104.8 754.689  23
   1  -2   4 35292.8 744.079   3
   1  -2   4 35274.9 749.410   4
   1  -2   5 30271.2 637.212   3
   1  -2   5 29088.6 697.268  47
   1  -2   6 671.027 48.3858   3
   1  -2   6 681.127 76.2059  47
   1  -2   7 41230.2 911.325  47
   1  -2   7 36779.3 775.854   3
   1  -2   8 6839.85 287.607  47
   1  -2   9 809.302 99.8225  47
   1  -2   9 955.595 52.4817  33
   1  -2  10 207.905 27.5925  30
   1  -2  10 200.102 26.6988  33
   1  -2  10 152.532 58.7338  47
   1  -2  10 166.898 24.0465  36
   1  -2  10 175.909 24.2889  35
   1  -2  10 174.426 22.7172  13
   1  -2  10 201.295 25.9091   7
   1  -2  11 11516.1 285.405  35
   1  -2  11 12077.7 296.497  33
   1  -2  11 12156.4 298.355  30
   1  -2  11 12691.8 293.590   7
   1  -2  11 11705.2 290.029  36
   1  -2  11 12759.3 478.051  47
   1  -2  11 12319.4 284.414  13
   1  -2  12 29247.3 590.544  13
   1  -2  12 27054.7 603.612  30
   1  -2  12 28194.7 597.549   7
   1  -2  12 29386.7 608.305  33
   1  -2  12 27834.6 599.519  36
   1  -2  12 27481.7 594.044  35
   1  -2  12 29538.1 851.116  47
   1  -2  13 794.788 120.919  47
   1  -2  13 593.204 50.1886  30
   1  -2  13 662.111 47.7746  13
   1  -2  13 619.859 52.1894  36
   1  -2  13 621.654 50.3747  35
   1  -2  13 687.328 53.5251   7
  -1   2 -14 1355.97 71.6131   9
   1  -2  14 1349.69 77.8177  36
   1  -2  14 1245.29 147.893  47
   1  -2  14 1289.75 75.3436  30
   1  -2  14 1405.90 70.9234  13
   1  -2  14 1358.54 76.7841  35
  -1   2 -15 60.5525 25.7278   9
   1  -2  15 8.03181 27.1335  35
   1  -2  15 47.5796 21.6145  13
   1  -2  15 12.9290 51.2669  47
   1  -2  15-30.4218 22.1289  30
   1  -2  16 10445.6 259.245  30
  -1   2 -16 10587.5 261.502   9
   1  -2  16 10530.1 258.502  13
   1  -2  17 513.126 35.5160  30
   1  -2  17 474.845 41.7209  34
  -1   2 -17 480.618 39.9593   9
   1  -2  17 500.617 46.2599   6
   1  -2  17 468.828 37.7175  13
   1  -2  18 500.590 40.3236   6
  -1   2 -18 511.150 35.0784   9
   1  -2  18 451.613 32.7726  13
   1  -2  18 402.446 32.4963  34
   1  -2  19 815.875 45.4919   6
   1  -2  19 769.043 38.3065  34
  -1   1  19 83.2983 16.9602  11
  -1   1  19 157.766 26.9770  13
  -1   1  19 152.581 24.8218   6
  -1   1  18 569.419 38.4355  29
  -1   1  18 703.051 51.5242  13
  -1   1  18 614.820 46.6555   6
  -1   1  17 9580.22 247.788  13
   1  -1 -17 9030.45 247.458   9
  -1   1  16 1235.72 74.9842  13
   1  -1 -16 1158.66 74.9223   9
   1  -1 -16 1272.38 72.8905   2
   1  -1 -15 668.038 54.6947   2
   1  -1 -15 590.459 54.6427   9
  -1   1  15 699.220 58.0005  13
   1  -1 -14 1469.66 167.725   1
  -1   1  14 1364.69 76.2911  13
   1  -1 -14 1329.90 77.1955   9
  -1   1  14 1534.07 155.316  47
   1  -1 -14 1355.19 76.0598   2
   1  -1 -13 17122.4 412.488   9
  -1   1  13 18239.3 415.114  13
   1  -1 -13 18975.1 661.594   1
   1  -1 -13 18196.4 414.115   2
  -1   1  12 1727.56 79.9278  13
   1  -1 -12 1928.85 178.772   1
  -1   1  12 1664.05 153.532  47
   1  -1 -12 1704.61 80.7899   9
   1  -1 -12 1794.69 80.5017   2
   1  -1 -11 18801.1 407.656   2
  -1   1  11 18152.7 567.163  47
  -1   1  11 18253.2 408.022  13
   1  -1 -11 18424.9 410.196   9
   1  -1 -11 18389.9 601.139   1
  -1   1  10 3030.12 102.850  13
   1  -1 -10 2985.90 102.591   9
   1  -1 -10 3244.50 202.764   1
   1  -1 -10 3076.42 101.455   2
   1  -1  -9 1801.68 138.276   1
   1  -1  -9 1834.97 70.1132   2
   1  -1  -8 38525.1 762.456   2
   1  -1  -8 39565.8 916.709   1
   1  -1  -7 2996.47 156.685   1
   1  -1  -7 3040.54 88.0734   2
   1  -1  -6 1386.81 50.3743   2
   1  -1  -6 1353.30 96.0752   1
   1  -1  -6 1456.30 52.6422   3
   1  -1  -5 1064.38 49.8459   4
   1  -1  -5 1048.55 76.8808   1
   1  -1  -5 1082.25 50.1965   3
   1  -1  -4 11685.1 319.612   1
   1  -1  -4 12535.5 281.680   3
   1  -1  -4 12481.0 280.841   4
   1  -1  -3 4172.50 145.595   1
   1  -1  -3 4375.12 127.254   3
   1  -1  -3 4458.82 128.348   4
   1  -1  -2 33465.0 686.614   4
   1  -1  -2 34576.4 688.862   3
   1  -1  -2 33786.2 700.415   1
   1  -1  -1 182846. 3447.62   4
   1  -1  -1 171699. 3445.12   3
   1  -1   0 22443.9 478.871  45
   1  -1   0 23659.5 484.700   3
   1  -1   1 132312. 2559.68   4
   1  -1   1 142585. 2563.99   3
   1  -1   1 127418. 2552.12  47
   1  -1   1 138415. 2550.67  45
   1  -1   2 5596.93 149.072   3
   1  -1   2 5428.41 135.997  45
   1  -1   2 5172.63 145.593   4
   1  -1   2 4977.09 152.654  47
   1  -1   3 6203.32 148.575  45
   1  -1   3 6221.27 188.566  47
   1  -1   3 6422.26 165.730   3
   1  -1   3 5912.76 163.505   4
   1  -1   4 13517.5 284.883  45
   1  -1   4 13345.0 350.756  47
   1  -1   4 13148.4 303.820   4
   1  -1   4 14341.4 306.432   3
   1  -1   5 2749.05 89.5278   4
   1  -1   5 2578.56 87.1823   3
   1  -1   5 2819.87 75.8171  45
   1  -1   5 2580.12 130.550  47
   1  -1   6 392.870 55.6612  47
   1  -1   6 409.791 26.5916   3
   1  -1   7 8327.46 297.117  47
   1  -1   8 11733.2 381.676  47
  -1   1  -8 10931.1 246.770   2
   1  -1   9 23300.2 657.357  47
  -1   1  -9 23599.0 488.363   2
   1  -1  10 2693.94 98.2927  33
   1  -1  10 2747.66 97.2496  36
   1  -1  10 2813.11 98.7904   7
  -1   1 -10 2874.27 97.2013   2
   1  -1  10 2886.86 95.8617  13
   1  -1  10 3029.20 197.003  47
   1  -1  10 2738.74 95.5706  35
   1  -1  11 120.790 21.9124  13
   1  -1  11 89.3490 19.5880  30
   1  -1  11 60.6104 17.3048  36
   1  -1  11 63.0260 46.4260  47
   1  -1  11 80.5705 21.4351   7
   1  -1  11 63.7203 18.1931  33
   1  -1  11 67.7942 16.4486  35
  -1   1 -11 113.780 20.8302   2
   1  -1  12 4958.25 155.187  30
   1  -1  12 5373.96 298.854  47
   1  -1  12 5113.79 152.253  13
   1  -1  12 4940.60 154.605   7
   1  -1  12 5159.82 157.985  36
   1  -1  12 5156.07 155.264  35
   1  -1  13 28980.1 632.794   7
   1  -1  13 29754.2 634.716  35
   1  -1  13 30356.1 630.165  13
   1  -1  13 30227.9 638.912  36
   1  -1  13 29504.9 631.075  30
   1  -1  14 137.813 29.8593  13
   1  -1  14 119.642 29.8417  35
   1  -1  14 183.271 71.3933  47
   1  -1  14 117.707 28.5779  36
   1  -1  14 175.444 33.9682   7
   1  -1  14 133.008 26.4281  30
   1  -1  15 283.492 32.6686  30
  -1   1 -15 272.615 36.4538   9
   1  -1  15 243.510 75.5547  47
   1  -1  15 317.241 37.8939  13
   1  -1  15 313.120 40.8810  35
   1  -1  16 2285.00 96.4587  13
   1  -1  16 2222.87 204.837  47
  -1   1 -16 2239.43 98.7500   9
  -1   1 -17 1348.60 71.8430   9
   1  -1  17 1297.61 68.2727  13
   1  -1  18 538.002 45.0253   6
  -1   1 -18 531.145 41.4666   9
   1  -1  18 552.437 42.7277  13
   1  -1  19 627.842 42.8554   6
   1  -1  19 478.670 32.7088  34
  -1   1 -19 611.567 39.4394   9
   1  -1  19 578.934 37.9409  13
  -1   0  19 1189.04 52.2857  29
  -1   0  19 1292.03 58.5171  13
  -1   0  19 1289.43 59.3628   6
  -1   0  18 6415.20 169.672  11
  -1   0  18 6514.83 175.438  29
  -1   0  18 6818.18 181.652  13
  -1   0  18 6747.87 182.258   6
  -1   0  17 1359.53 72.1356  13
  -1   0  17 1281.92 71.6565   6
   1   0 -17 1350.56 72.4054   9
  -1   0  16 20897.8 464.475  13
   1   0 -16 20186.6 461.877   9
  -1   0  15 3337.65 125.888  13
   1   0 -15 3145.18 122.483   9
   1   0 -15 3321.60 125.601   2
   1   0 -14 283.156 42.1265   9
  -1   0  14 283.808 41.3344  13
  -1   0  14 289.496 30.0266  30
  -1   0  14 244.471 65.9825  47
   1   0 -14 310.734 37.5464   2
   1   0 -13 1493.75 161.032   1
  -1   0  13 1531.53 79.4587  13
  -1   0  13 1814.76 161.351  47
   1   0 -13 1497.42 77.3184   2
   1   0 -13 1602.81 78.6083   9
  -1   0  13 1545.97 70.3881  30
  -1   0  12 17805.3 392.770  30
   1   0 -12 16837.7 397.328   9
  -1   0  12 17845.4 579.215  47
   1   0 -12 17831.1 401.551   2
  -1   0  12 18020.1 401.410  13
   1   0 -12 18253.6 617.642   1
  -1   0  11 4128.81 130.743  30
  -1   0  11 4329.01 235.873  47
   1   0 -11 4368.36 253.034   1
   1   0 -11 4226.68 133.309   9
  -1   0  11 4766.19 139.225  13
   1   0 -11 4338.16 134.244   2
  -1   0  11 4292.85 134.087  35
  -1   0  10 5197.62 247.882  47
  -1   0  10 5303.09 147.398  35
   1   0 -10 5483.52 267.318   1
  -1   0  10 4993.31 144.083   7
   1   0 -10 5069.91 143.990   2
  -1   0  10 5178.18 146.792  13
   1   0  -9 5039.40 137.485   2
  -1   0   9 5394.44 234.448  47
   1   0  -9 5221.93 241.858   1
   1   0  -8 254.280 23.1689   2
   1   0  -8 257.794 51.2994   1
   1   0  -7 1511.46 55.3153   2
   1   0  -7 1612.72 107.586   1
   1   0  -6 18513.8 468.514   1
   1   0  -5 2905.81 72.0257   4
  -1   0   5 2813.69 79.5456  44
   1   0  -5 2727.57 122.469   1
  -1   0   4 324.804 22.1106  46
   1   0  -4 232.753 32.0479   1
   1   0  -3 76.5496 19.4720   1
   1   0  -2 112979. 2189.67  45
   1   0  -2 118551. 2201.45   1
   1   0  -1 1269.70 52.9026  45
   1   0   0 45.4912 9.03391  45
   1   0   1 1193.27 48.9458  45
   1   0   2 167731. 3153.82  45
   1   0   3 21995.0 456.303  45
   1   0   4 122449. 2312.72  45
  -1   0  -4 119762. 2358.16   1
   1   0   5 432.101 23.2927   4
  -1   0  -5 379.112 45.7329   1
  -1   0  -5 410.005 25.3554  46
   1   0   5 367.150 32.0144  45
   1   0   6 11910.1 289.488  45
  -1   0  -6 12270.9 351.629   1
  -1   0  -7 46805.3 904.479   2
  -1   0  -7 46450.4 1039.54   1
   1   0   7 46698.9 945.393  45
  -1   0  -8 339.565 56.3304   1
  -1   0  -8 357.183 26.8573   2
  -1   0  -9 984.157 48.5361   2
  -1   0 -10 3296.43 105.931   2
   1   0  10 3216.50 200.942  47
   1   0  11 62209.6 1467.28  47
   1   0  11 62489.9 1226.65  13
   1   0  11 63715.7 1228.14  36
   1   0  11 62743.4 1229.13   7
   1   0  11 63918.5 1228.31  35
  -1   0 -11 59930.0 1224.74   2
  -1   0 -12 19246.0 417.391   2
   1   0  12 17884.5 413.567   7
   1   0  12 19452.6 416.450  13
   1   0  12 18874.0 625.813  47
   1   0  12 18533.9 414.841  35
   1   0  12 17756.2 412.213  36
   1   0  13 1071.32 62.0068  36
   1   0  13 985.704 62.0526   7
  -1   0 -13 1015.26 61.1881   2
   1   0  13 895.735 58.1045  13
   1   0  13 851.521 126.492  47
   1   0  13 1064.21 63.6145  35
   1   0  14 319.092 39.5506  35
   1   0  14 348.210 40.9917  13
   1   0  14 352.620 86.0303  47
   1   0  14 265.523 39.4896   7
   1   0  15 2058.83 94.5300  13
   1   0  15 2162.15 98.4739  35
   1   0  15 2063.14 197.956  47
   1   0  15 2000.74 96.6111   7
  -1   0 -16 11667.3 305.806   9
   1   0  16 12366.0 301.744  13
   1   0  17 561.954 49.9259  13
  -1   0 -17 587.212 53.4274   9
   1   0  18 2094.26 87.9372  13
  -1   0 -18 1912.27 87.9998   9
   1   0  19 1794.22 75.2520  13
  -1   0 -19 1900.15 79.5390   9
   1   0  19 1791.84 77.9667   6
   1   0  20 5423.65 142.473   6
   1   0  20 5534.68 137.864  13
   1   0  20 5244.07 132.350  29
  -1  -1  19 276.919 25.4366  13
  -1  -1  19 230.872 25.2582   6
  -1  -1  19 264.131 25.1120  29
  -1  -1  18 409.618 38.6322   6
  -1  -1  18 370.734 34.1709  13
  -1  -1  18 424.814 36.4288  29
  -1  -1  18 394.973 30.2216  11
  -1  -1  17 1671.81 79.3439   6
  -1  -1  17 1586.87 68.2727  11
  -1  -1  17 1707.38 76.1500  13
  -1  -1  16 1923.77 81.2586  11
  -1  -1  16 1870.53 91.6690   6
  -1  -1  16 1964.67 88.3148  13
   1   1 -16 2074.35 88.5622   9
  -1  -1  16 1986.89 77.7484  30
  -1  -1  15 5247.69 160.904  13
  -1  -1  15 4792.38 148.022  30
   1   1 -15 4891.64 155.925   9
  -1  -1  14 449.339 42.5210  30
   1   1 -14 479.171 44.4011   9
  -1  -1  14 578.266 50.0572  13
   1   1 -13 3868.36 132.932   9
  -1  -1  13 3968.25 245.114  47
   1   1 -13 4136.67 137.258   2
  -1  -1  13 4150.66 138.417  13
  -1  -1  13 4054.26 136.829  30
   1   1 -12 4514.18 142.801   9
  -1  -1  12 4444.18 253.692  47
  -1  -1  12 4784.34 147.158  13
   1   1 -12 4659.04 145.986   2
  -1  -1  12 4537.88 147.196  30
  -1  -1  11 7243.28 317.949  47
   1   1 -11 7162.65 191.920   9
  -1  -1  11 7584.48 196.817  13
   1   1 -11 7638.16 335.413   1
  -1  -1  11 7167.44 194.620  35
   1   1 -11 7313.37 194.758   2
  -1  -1  11 7111.74 199.589  30
  -1  -1  10 472.217 36.1498  35
   1   1 -10 472.795 35.4856   2
   1   1 -10 462.497 77.9682   1
  -1  -1  10 483.605 37.0135  13
   1   1 -10 443.827 34.8074   9
  -1  -1  10 459.611 38.5778  30
  -1  -1  10 474.645 76.4976  47
   1   1  -9 36530.9 876.658   1
   1   1  -9 34661.7 707.772   2
   1   1  -8 1484.02 57.8392   2
   1   1  -8 1536.08 115.127   1
  -1  -1   8 1628.99 117.746  47
  -1  -1   7 740.095 70.7254  47
   1   1  -7 732.979 35.1443   2
   1   1  -7 719.508 70.2431   1
  -1  -1   6 104.562 29.1860  47
   1   1  -6 108.059 26.0749   1
  -1  -1   5 32104.0 701.639  47
  -1  -1   5 32382.3 640.407  23
  -1  -1   5 31902.7 641.559  44
   1   1  -5 31688.4 694.421   1
  -1  -1   4 25781.1 531.338  23
   1   1  -4 25336.3 548.699   1
  -1  -1   4 25579.1 535.055  44
  -1  -1   4 25168.2 523.738  46
  -1  -1   4 25546.8 558.727  47
  -1  -1   3 33829.7 687.694  46
   1   1  -3 33270.7 663.832  45
  -1  -1   3 34232.1 689.749  47
   1   1  -3 33747.3 685.098   1
  -1  -1   3 32836.5 696.328  44
  -1  -1   2 24.5670 10.0503  47
   1   1  -2 34.7689 9.26444  45
   1   1  -2 17.3734 9.25544   1
  -1  -1   2 19.6155 10.6177  44
  -1  -1   2 3.50402 9.97895  46
  -1  -1   1 1181.66 61.5543  46
   1   1  -1 1231.97 52.1597  45
  -1  -1   1 1213.80 63.9640  44
  -1  -1   0 1859.35 79.2292  44
   1   1   0 2003.83 73.3232  45
  -1  -1  -1 19226.1 420.375  44
  -1  -1  -1 19368.0 416.831  46
   1   1   1 18504.4 416.337  45
  -1  -1  -2 784.801 47.6335  46
  -1  -1  -2 770.935 48.7688   1
  -1  -1  -2 774.026 49.2727  44
  -1  -1  -3 9084.69 225.868  46
  -1  -1  -3 8531.99 236.704   1
  -1  -1  -3 8636.81 226.896  44
  -1  -1  -4 42176.6 916.101  44
  -1  -1  -4 45897.0 957.137   1
  -1  -1  -5 757.207 44.3691  44
  -1  -1  -5 755.060 65.9172   1
  -1  -1  -5 718.851 42.8876  23
  -1  -1  -5 737.282 45.0175  46
  -1  -1  -6 939.525 80.5179   1
  -1  -1  -6 1010.25 45.2230  23
  -1  -1  -6 1047.23 46.1971  44
  -1  -1  -6 1138.16 50.3945  46
  -1  -1  -7 22998.9 590.371   1
  -1  -1  -7 23125.5 465.508   2
   1   1   8 44.0621 18.5895  45
  -1  -1  -8 25.4755 29.1099   1
  -1  -1  -8 29.4552 9.91345   2
  -1  -1  -9 18458.1 386.498   2
   1   1   9 17544.4 473.369  45
  -1  -1  -9 18089.2 539.850   1
  -1  -1 -10 9958.70 235.457   2
   1   1  10 9584.18 305.140  45
  -1  -1 -10 9953.01 381.031   1
  -1  -1 -11 6708.59 179.895   2
   1   1  11 6436.60 177.301  35
   1   1  11 6855.43 182.380   7
   1   1  12 2299.01 94.3865  13
   1   1  12 2449.67 96.9893   7
  -1  -1 -12 2436.86 95.5921   2
   1   1  12 2439.96 91.0353  36
   1   1  12 2401.27 93.8269  35
   1   1  13 48097.9 967.512  35
  -1  -1 -13 47269.4 969.184   2
   1   1  13 46955.4 970.859  13
   1   1  13 49353.0 974.613   7
   1   1  13 48633.2 1259.74  47
  -1  -1 -14 10112.2 261.947   2
   1   1  14 9834.69 261.388   7
   1   1  14 9863.79 262.018  13
   1   1  14 9901.91 256.891  35
   1   1  14 9692.89 448.738  47
   1   1  15 1075.72 67.4851  35
   1   1  15 1224.65 73.0081  13
   1   1  15 1021.77 141.518  47
   1   1  15 1343.50 77.3377   7
   1   1  16 1143.51 152.680  47
  -1  -1 -16 1233.59 79.7123   9
   1   1  16 1291.38 76.6410  13
  -1  -1 -17 17649.3 422.011   9
   1   1  17 18121.2 417.488  13
   1   1  18 7.71636 24.2029  13
  -1  -1 -18 25.6516 27.6868   9
   1   1  19 349.006 37.2457  13
  -1  -1 -19 365.709 38.5261   9
   1   1  20 457.406 30.2364  34
   1   1  20 480.040 37.8529   6
  -1  -1 -20 567.718 40.5504   9
   1   1  20 533.083 30.1165  29
   1   1  20 542.948 38.2849  13
  -1  -2  18 90.6288 21.4495  29
  -1  -2  18 99.1387 18.5881  13
  -1  -2  18 62.9095 19.9125   6
  -1  -2  17 91.6102 19.5483  11
  -1  -2  17 104.579 18.6445  30
  -1  -2  17 163.533 29.7606  29
  -1  -2  17 95.9813 23.8058  13
  -1  -2  17 101.372 26.0199   6
  -1  -2  16 5545.16 158.198  13
  -1  -2  16 5222.52 154.323  30
  -1  -2  16 5123.05 148.778  11
  -1  -2  16 5394.59 164.979   6
  -1  -2  16 5532.38 147.956  34
  -1  -2  15 68.0167 28.5366   6
  -1  -2  15 75.5539 24.2617  13
  -1  -2  15 130.020 24.1119  11
  -1  -2  15 86.5572 21.0422  34
   1   2 -15 93.2028 23.9874   9
  -1  -2  15 44.3917 21.8581  30
  -1  -2  14 129.229 33.7120   6
   1   2 -14 137.007 27.9533   9
  -1  -2  14 143.848 30.0829  30
  -1  -2  14 110.704 26.8193  13
  -1  -2  14 144.882 26.1936  11
  -1  -2  13 1223.89 68.0710  13
  -1  -2  13 1158.10 130.414  47
   1   2 -13 1235.80 65.7676   9
  -1  -2  13 1198.67 71.6310  30
  -1  -2  12 33830.4 682.726  13
   1   2 -12 32436.3 676.493   9
  -1  -2  12 31858.2 694.876  30
  -1  -2  12 32956.7 888.118  47
  -1  -2  11 46.5086 18.1115  13
  -1  -2  11 30.6574 38.7626  47
   1   2 -11 53.3948 19.1063   9
  -1  -2  11 40.5801 19.4333  35
  -1  -2  11 79.5980 22.9916  30
  -1  -2  10 6820.23 299.230  47
  -1  -2  10 7486.40 196.745  36
   1   2 -10 7051.91 185.336   9
  -1  -2  10 7272.93 201.494  30
  -1  -2  10 7504.00 190.174  13
  -1  -2  10 6930.23 187.824  35
  -1  -2   9 1123.16 109.035  47
  -1  -2   9 1168.02 58.8816  36
  -1  -2   9 1296.90 58.4156  13
  -1  -2   9 1135.56 60.8937  30
  -1  -2   9 1198.63 56.7599  35
   1   2  -8 32625.3 759.374   1
  -1  -2   8 32223.1 788.635  47
  -1  -2   7 14633.8 417.840  47
   1   2  -7 14380.0 393.647   1
  -1  -2   6 1118.68 61.9707  44
  -1  -2   6 1141.49 86.7846  47
  -1  -2   6 1116.59 60.1956  23
   1   2  -6 1104.62 74.5345   1
  -1  -2   5 9038.77 268.610  47
  -1  -2   5 8448.45 231.540  23
   1   2  -5 8501.66 235.156   1
  -1  -2   5 8675.36 237.691  44
   1   2  -4 396.754 32.8604   1
  -1  -2   4 574.319 49.3280  44
  -1  -2   4 422.840 40.5316  46
  -1  -2   4 479.218 44.1123  23
  -1  -2   4 545.862 49.1488  47
  -1  -2   3 3032.35 123.863  44
  -1  -2   3 3033.88 117.083  47
  -1  -2   3 3017.89 121.051  23
   1   2  -3 2957.73 89.4998   1
   1   2  -3 2961.42 89.1402  45
  -1  -2   3 3070.55 121.305  46
  -1  -2   2 55460.1 1062.20  47
   1   2  -2 52414.4 1042.45  45
  -1  -2   2 54429.3 1094.85   3
   1   2  -2 52519.8 1014.48   1
  -1  -2   2 52757.0 1083.98  46
  -1  -2   2 52534.8 1085.38  23
  -1  -2   2 53598.0 1094.93  44
  -1  -2   1-7.95732 15.8047   3
  -1  -2   1 15.3172 13.2711  44
  -1  -2   1 15.6911 18.4962  23
  -1  -2   1-0.43229 13.7814  46
   1   2  -1 10.3968 12.6085  45
  -1  -2   0 518.133 48.7429  44
  -1  -2   0 554.441 50.8573  46
  -1  -2   0 589.086 50.8401   3
  -1  -2  -1 667.819 55.9495   3
  -1  -2  -1 601.457 53.5487  44
  -1  -2  -1 649.702 54.6607  46
  -1  -2  -2 78269.2 1539.17  44
  -1  -2  -2 75004.5 1528.71   3
  -1  -2  -2 74597.8 1503.54   1
  -1  -2  -2 76122.8 1533.13  23
  -1  -2  -3 7420.43 229.293  23
  -1  -2  -3 7979.55 235.161  44
  -1  -2  -3 7927.56 234.611   3
  -1  -2  -3 8099.69 234.062  46
  -1  -2  -3 8162.04 228.169   1
  -1  -2  -4 24330.4 563.556  23
  -1  -2  -4 25466.3 568.933  44
  -1  -2  -4 25402.0 566.186  46
  -1  -2  -4 24724.1 567.541   3
  -1  -2  -4 26496.4 582.958   1
  -1  -2  -5 129.706 31.8946   1
  -1  -2  -5 153.960 25.7173  44
  -1  -2  -5 119.512 23.8720  23
  -1  -2  -6 10868.2 283.796  46
  -1  -2  -6 10877.4 333.361   1
  -1  -2  -6 11019.6 284.258  44
  -1  -2  -6 10490.6 282.017  23
  -1  -2  -6 10932.9 233.438   2
  -1  -2  -7 1389.80 52.3156   2
  -1  -2  -7 1350.81 71.9598  23
  -1  -2  -7 1417.48 108.094   1
  -1  -2  -7 1372.44 71.1633  44
  -1  -2  -8 959.892 51.5225  44
  -1  -2  -8 949.273 45.0088   2
  -1  -2  -8 1001.18 51.0403  23
  -1  -2  -9 320.703 62.6844   1
  -1  -2  -9 244.136 24.8628   2
  -1  -2 -10 39013.3 938.550   1
   1   2  10 38241.8 871.646  45
   1   2  11 714.132 46.9823   7
  -1  -2 -11 793.873 49.0886   2
  -1  -2 -11 764.515 104.482   1
   1   2  11 719.401 84.7496  45
   1   2  12 53.7287 17.5545  35
   1   2  12 15.5840 16.3542   7
  -1  -2 -12 81.3704 22.3472   2
   1   2  13 523.454 46.9219  13
   1   2  13 473.896 42.4772   7
  -1  -2 -13 543.335 47.4544   2
   1   2  13 579.065 43.3687  35
   1   2  14 36221.0 777.309  13
   1   2  14 38952.7 764.328  35
  -1  -2 -14 35623.7 770.944   2
   1   2  14 34476.5 1049.92  47
   1   2  14 37423.4 775.174   7
   1   2  15 46.4282 24.2053   7
   1   2  15 21.2354 26.6914  13
  -1  -2 -15 10.4170 22.6232   2
  -1  -2 -16 2351.63 112.702   9
   1   2  16 2728.88 116.959  13
   1   2  16 2460.37 223.990  47
   1   2  17 424.693 50.7723  13
  -1  -2 -17 393.304 48.6791   9
   1   2  18 6000.89 179.457  13
  -1  -2 -18 5174.44 173.094   9
  -1  -2 -19 645.440 51.3853   9
   1   2  19 687.797 52.7418  13
  -1  -2 -20 299.163 24.9319  25
   1   2  20 366.088 34.4935  13
  -1  -2 -20 286.461 31.1477   9
  -1  -3  18 1397.13 58.8168   6
  -1  -3  18 1354.57 58.1333  29
  -1  -3  18 1284.22 56.1532  39
  -1  -3  17 363.448 29.0127  13
  -1  -3  17 315.642 28.5811  30
  -1  -3  17 296.148 33.1654  29
  -1  -3  16 6584.47 171.944  11
  -1  -3  16 6929.91 178.207  13
  -1  -3  16 6804.46 186.483  30
  -1  -3  16 7256.74 192.580   6
  -1  -3  16 6849.47 171.319  34
  -1  -3  15 10578.7 252.520  34
  -1  -3  15 10630.9 257.466  13
  -1  -3  15 10723.2 254.036  11
  -1  -3  15 10969.6 272.127   6
  -1  -3  15 10275.5 270.932  30
  -1  -3  14 184.792 26.9230  11
  -1  -3  14 166.339 36.1764   6
   1   3 -14 183.454 26.6236   9
  -1  -3  14 177.702 29.1670  13
  -1  -3  14 152.269 35.2211  30
  -1  -3  14 194.677 28.2769  34
  -1  -3  13 599.769 55.0441  30
  -1  -3  13 590.229 52.6032   6
  -1  -3  13 541.962 43.1870  34
  -1  -3  13 541.951 42.6622  11
  -1  -3  13 664.294 48.6171  13
  -1  -3  13 729.133 103.727  47
   1   3 -13 673.746 45.0416   9
  -1  -3  12 123.165 23.4696  34
  -1  -3  12 108.282 29.8337  30
  -1  -3  12 134.584 25.8169  11
  -1  -3  12 117.551 28.2793   6
   1   3 -12 78.4332 20.5718   9
  -1  -3  12 54.2771 36.1625  47
  -1  -3  12 174.641 26.4004  13
   1   3 -11 16595.6 364.952   9
  -1  -3  11 15996.7 365.874  11
  -1  -3  11 16434.1 375.806  35
  -1  -3  11 16151.1 388.992  30
  -1  -3  11 16858.6 370.881  13
  -1  -3  10 2130.99 93.1974  30
  -1  -3  10 2097.22 81.1260  11
  -1  -3  10 2089.90 81.6195  13
  -1  -3  10 2208.09 86.4235  35
  -1  -3  10 2204.69 163.110  47
   1   3 -10 2044.84 77.9123   9
  -1  -3   9 1475.94 72.9576  30
  -1  -3   9 1603.20 131.499  47
  -1  -3   9 1597.21 68.6189  12
  -1  -3   9 1517.52 69.9031  33
  -1  -3   9 1510.15 66.7710  35
  -1  -3   9 1425.49 68.5052  36
  -1  -3   9 1529.92 64.9244  13
  -1  -3   8 4087.68 129.470  30
  -1  -3   8 4293.10 126.419  36
  -1  -3   8 4231.48 122.688  35
  -1  -3   7 5521.22 234.704  47
  -1  -3   6 103.774 33.4782  47
  -1  -3   6 157.457 29.8772  23
  -1  -3   6 106.871 25.2390  44
  -1  -3   5 2315.33 119.367  23
  -1  -3   5 2734.31 136.747  47
  -1  -3   5 2412.12 124.343  44
  -1  -3   4 1979.63 112.858  44
  -1  -3   4 2043.37 108.713  47
  -1  -3   4 2024.23 109.705  23
   1   3  -4 1668.42 51.7821  45
  -1  -3   3 2382.91 124.486  23
  -1  -3   3 2439.58 129.305   3
   1   3  -3 2501.81 93.2835  45
  -1  -3   3 2391.44 124.227  46
  -1  -3   3 2443.73 128.683  44
  -1  -3   2 41.8324 23.9921  23
  -1  -3   2 10.6841 17.7825  46
  -1  -3   2-4.76865 17.8009  44
   1   3  -2 50.6977 18.8759  45
  -1  -3   1 47871.8 1071.99  46
  -1  -3   1 50125.0 1072.67   3
  -1  -3   1 50225.5 1079.22  23
  -1  -3   0 380.493 52.4651  44
  -1  -3   0 285.640 44.8700  23
  -1  -3   0 264.097 43.6418  46
  -1  -3   0 317.824 44.9274   3
  -1  -3  -1 65906.0 1436.36  46
  -1  -3  -1 69768.2 1449.69  44
  -1  -3  -2 38895.4 822.294   1
  -1  -3  -2 40432.5 887.470  44
  -1  -3  -2 40101.6 871.515   3
  -1  -3  -2 40042.4 880.357  46
  -1  -3  -3 232506. 4694.77   3
  -1  -3  -3 235049. 4711.40  44
  -1  -3  -3 256999. 4675.31   1
  -1  -3  -3 244766. 4712.05  46
  -1  -3  -3 259181. 4725.41  23
  -1  -3  -4 2954.75 142.562  44
  -1  -3  -4 2672.68 129.225   1
  -1  -3  -4 2782.51 140.260  23
  -1  -3  -4 2772.59 138.741  46
  -1  -3  -4 2822.28 137.180   3
  -1  -3  -5 45404.7 957.708  44
  -1  -3  -5 44056.3 951.887   3
  -1  -3  -5 41605.8 950.612   1
  -1  -3  -5 42582.5 951.534  23
  -1  -3  -5 44063.3 952.792  46
  -1  -3  -6 31.9756 19.5077  46
  -1  -3  -6 101.003 33.1138  44
  -1  -3  -6 46.9199 10.7101   2
  -1  -3  -6 47.6808 23.8741  23
  -1  -3  -6 37.3388 25.1859   1
  -1  -3  -7 57831.6 1167.27  44
  -1  -3  -7 54383.8 1063.49   2
  -1  -3  -7 54783.2 1165.13  23
  -1  -3  -7 56073.7 1227.29   1
  -1  -3  -8 189.014 51.1514   1
  -1  -3  -8 225.965 22.6788   2
  -1  -3  -8 163.808 30.4667  44
  -1  -3  -8 199.609 34.6298  23
  -1  -3  -9 1092.47 52.7830   2
  -1  -3  -9 1101.78 114.888   1
  -1  -3 -10 760.170 101.359   1
  -1  -3 -10 692.886 45.4127   2
   1   3  11 45837.4 894.386   7
  -1  -3 -11 42885.5 892.046   2
  -1  -3 -11 44654.2 1141.68   1
  -1  -3 -12 9876.47 429.893   1
   1   3  12 9016.82 236.340   7
   1   3  12 9989.28 380.236  45
  -1  -3 -12 9416.57 241.260   2
   1   3  13 2471.19 99.7831   7
   1   3  13 2520.69 106.025  13
  -1  -3 -13 2447.22 102.072   2
  -1  -3 -14 9389.75 250.421   2
   1   3  14 9238.64 243.959   7
   1   3  14 9120.53 253.739  13
  -1  -3 -15 15221.7 379.375   9
  -1  -3 -15 16014.6 376.151   2
   1   3  15 15504.7 366.542   7
   1   3  15 15326.3 380.397  13
  -1  -3 -16 1887.54 96.3739   9
   1   3  16 1836.03 97.0865  13
   1   3  17 2853.86 120.694  13
  -1  -3 -17 2764.55 117.680   9
  -1  -3 -18 99.9465 32.1387   9
   1   3  18 86.2514 34.0015  13
   1   3  19 229.798 35.0436  13
  -1  -3 -19 227.137 35.5315   9
  -1  -3 -20 1464.53 64.0009   9
   1   3  20 1148.34 59.9523  13
  -1  -4  17 3868.10 113.508   6
  -1  -4  17 3755.66 113.604  29
  -1  -4  17 3845.78 112.964  39
  -1  -4  17 3679.23 108.931  30
  -1  -4  16 39666.0 796.022  30
  -1  -4  16 38022.1 790.655  39
  -1  -4  16 37933.5 792.050  29
  -1  -4  16 39728.3 772.133  34
  -1  -4  16 39757.5 778.838  20
  -1  -4  16 40408.3 795.320   6
  -1  -4  15 1190.10 55.7079  34
  -1  -4  15 1095.04 65.5143   6
  -1  -4  15 1228.71 56.2841  13
  -1  -4  15 1164.41 67.4979  30
  -1  -4  14 10128.6 266.255  30
  -1  -4  14 9812.87 239.679  13
  -1  -4  14 9698.63 238.806  11
  -1  -4  14 10034.1 242.073  34
  -1  -4  14 10198.2 257.973   6
  -1  -4  13 2400.99 90.6922  11
  -1  -4  13 2344.34 106.055  30
  -1  -4  13 2349.39 91.7915  34
  -1  -4  13 2266.42 88.3929  13
  -1  -4  13 2346.32 99.7117   6
  -1  -4  12 8429.46 214.974  13
  -1  -4  12 8344.10 238.220  30
  -1  -4  12 8502.51 217.733  11
  -1  -4  12 8678.99 220.444  34
  -1  -4  12 8459.36 229.123   6
  -1  -4  11 574.102 41.9792  11
  -1  -4  11 512.525 39.0978  13
  -1  -4  11 562.663 42.9246  34
  -1  -4  11 530.767 46.9494   6
  -1  -4  11 549.753 51.2348  30
  -1  -4  10 9819.07 235.692  11
  -1  -4  10 9296.53 237.398  34
  -1  -4  10 9842.28 243.044  12
  -1  -4  10 9037.46 250.405  30
  -1  -4  10 9783.01 233.890  13
  -1  -4  10 9607.49 244.171   6
  -1  -4  10 9639.46 241.662  35
  -1  -4   9 534.464 44.4900  30
  -1  -4   9 580.694 42.5425  12
  -1  -4   9 586.280 42.2666  33
  -1  -4   9 597.429 43.2492   6
  -1  -4   9 583.654 38.1748  13
  -1  -4   9 611.866 42.0095  34
  -1  -4   9 630.090 46.5506  36
  -1  -4   9 584.015 41.6146  35
  -1  -4   9 634.824 40.7701  11
  -1  -4   8 33376.6 664.550  13
  -1  -4   8 33881.4 678.247  12
  -1  -4   8 32384.6 675.844  36
  -1  -4   8 33373.6 688.219  17
  -1  -4   8 33052.3 671.458  34
  -1  -4   8 34282.6 672.458  35
  -1  -4   8 32032.2 681.484  30
  -1  -4   8 32644.6 673.979   6
  -1  -4   8 33187.4 673.890  33
  -1  -4   8 33080.5 667.275  11
  -1  -4   7 13573.2 321.472  30
  -1  -4   7 14267.1 314.532  34
  -1  -4   7 14600.7 317.520   6
  -1  -4   7 14040.5 311.956  35
  -1  -4   7 14158.0 327.962  17
  -1  -4   7 14389.3 317.992  36
  -1  -4   6 407.085 55.2199  23
  -1  -4   6 474.493 62.9295  44
  -1  -4   5 10811.3 241.512  48
  -1  -4   5 10901.5 242.329  43
  -1  -4   5 10804.7 346.879  23
  -1  -4   5 11259.8 358.308  44
  -1  -4   4 14250.2 420.929  23
  -1  -4   4 15194.6 438.348  44
  -1  -4   4 15208.0 429.503   3
  -1  -4   4 14145.3 304.612  48
  -1  -4   4 14254.6 303.452  42
  -1  -4   4 13899.4 305.770  43
  -1  -4   3 3442.74 98.9870  48
  -1  -4   3 3419.69 96.0880  42
  -1  -4   3 3271.22 172.336  23
   1   4  -3 3353.16 132.948  45
  -1  -4   3 3268.79 97.5843  43
  -1  -4   3 3542.36 182.185  44
  -1  -4   3 3518.30 174.600   3
  -1  -4   2 99.1631 36.2238   3
  -1  -4   2 118.266 39.8033  44
  -1  -4   2 104.515 14.9584  42
  -1  -4   2 111.960 16.0929  43
   1   4  -2 112.660 24.6997  45
  -1  -4   2 112.027 16.4734  48
  -1  -4   2 115.932 36.5716  23
  -1  -4   1 571.118 71.9349  23
  -1  -4   1 568.933 31.3005  42
  -1  -4   1 515.166 32.4233  43
  -1  -4   1 516.505 68.9882  46
  -1  -4   1 561.499 72.2902  44
  -1  -4   1 580.706 33.5969  48
  -1  -4   1 529.013 66.3617   3
  -1  -4   0 6848.99 251.356   3
  -1  -4   0 6453.65 258.915  46
  -1  -4   0 6355.11 256.519  23
  -1  -4   0 6614.82 264.515  44
  -1  -4   0 6707.68 162.652  43
  -1  -4   0 6576.23 156.575  42
  -1  -4   0 6454.74 160.467  48
  -1  -4  -1 85262.4 1566.40  42
  -1  -4  -1 83088.3 1736.64  44
  -1  -4  -1 79810.2 1569.36  48
  -1  -4  -1 82812.1 1709.08   3
  -1  -4  -1 81358.7 1570.76  43
  -1  -4  -1 82369.5 1730.52  46
  -1  -4  -1 82754.8 1732.72  23
  -1  -4  -2 36148.8 723.920  43
  -1  -4  -2 37064.5 724.017  48
  -1  -4  -2 38064.2 881.687  44
  -1  -4  -2 36190.4 718.108  42
  -1  -4  -2 37562.6 874.519  46
  -1  -4  -2 37704.6 857.410   3
  -1  -4  -2 37639.0 782.380   1
  -1  -4  -2 34931.2 864.693  23
  -1  -4  -3 21903.6 441.044  48
  -1  -4  -3 20804.9 557.512   3
  -1  -4  -3 19834.6 567.679  23
  -1  -4  -3 21600.1 581.739  44
  -1  -4  -3 21478.0 440.029  43
  -1  -4  -3 21774.6 578.466  46
  -1  -4  -3 20903.9 509.390   1
  -1  -4  -3 21253.5 434.820  42
  -1  -4  -4 46473.4 989.657   1
  -1  -4  -4 44878.7 882.683  42
  -1  -4  -4 47987.7 1052.25  44
  -1  -4  -4 45012.4 888.047  48
  -1  -4  -4 46013.1 888.522  43
  -1  -4  -4 44013.2 1036.89  23
  -1  -4  -4 45495.2 1039.57  46
  -1  -4  -4 46081.6 1027.45   3
  -1  -4  -5 5061.50 132.346  43
  -1  -4  -5 5172.62 123.804   2
  -1  -4  -5 5017.85 131.928  48
  -1  -4  -5 5190.88 209.728   1
  -1  -4  -5 4822.39 221.131  44
  -1  -4  -5 5146.78 219.690   3
  -1  -4  -5 4975.33 128.850  42
  -1  -4  -5 4577.80 218.178  23
  -1  -4  -5 4987.66 223.124  46
  -1  -4  -6 29197.5 755.040  23
  -1  -4  -6 31043.6 609.906   2
  -1  -4  -6 31699.0 754.510   3
  -1  -4  -6 30843.1 612.560  42
  -1  -4  -6 32111.1 760.345   1
  -1  -4  -6 31208.6 616.522  43
  -1  -4  -6 31315.4 763.799  44
  -1  -4  -6 29987.1 615.914  48
  -1  -4  -7 178.486 19.9815   2
  -1  -4  -7 128.456 45.0995   1
  -1  -4  -7 121.479 35.8945  44
  -1  -4  -7 128.863 37.4766  23
  -1  -4  -7 124.819 16.2854  43
  -1  -4  -8 12732.1 400.543  44
  -1  -4  -8 12861.0 400.267  23
  -1  -4  -8 14157.1 453.759   1
  -1  -4  -8 13690.9 290.701   2
  -1  -4  -8 12496.1 281.352  43
  -1  -4  -8 12868.4 282.096  48
  -1  -4  -9 672.575 97.1618   1
  -1  -4  -9 665.848 74.4313  23
  -1  -4  -9 645.996 71.7165  44
  -1  -4  -9 707.602 43.6894   2
  -1  -4 -10 27919.1 778.477   1
  -1  -4 -10 25685.1 545.164   2
  -1  -4 -11 633.434 46.5757  41
  -1  -4 -11 896.062 122.381   1
  -1  -4 -11 783.232 51.1064   2
  -1  -4 -12 6420.89 349.640   1
   1   4  12 6136.42 309.498  45
  -1  -4 -12 6727.54 189.921   2
  -1  -4 -13 4019.87 137.572   2
   1   4  13 3711.52 137.810  13
   1   4  13 3699.42 236.784  45
  -1  -4 -14 8818.91 242.764   2
  -1  -4 -14 8868.39 242.667   9
   1   4  14 8683.92 247.122  13
  -1  -4 -15 3712.56 138.550   2
   1   4  15 3573.94 140.548  13
  -1  -4 -15 3670.34 136.691   9
   1   4  16 4953.53 170.225  13
  -1  -4 -16 4852.20 164.501   9
   1   4  17 1046.98 71.9389  13
  -1  -4 -17 1126.04 72.1874   9
  -1  -4 -18 6250.45 179.716   9
   1   4  18 5945.21 183.657  13
  -1  -4 -18 6087.85 169.842  38
  -1  -4 -19 408.060 38.2165   9
   1   4  19 357.381 38.4831  13
   1   4  20 597.477 40.7160  13
  -1  -5  16 884.623 48.4289  29
  -1  -5  16 937.785 49.9764  39
  -1  -5  16 755.468 38.7011  20
  -1  -5  16 898.145 48.7854  30
  -1  -5  15 3358.74 116.517  30
  -1  -5  15 3286.72 106.804  20
  -1  -5  15 3458.32 112.967   6
  -1  -5  15 3529.28 116.011  29
  -1  -5  15 3595.68 116.302  39
  -1  -5  15 3300.86 100.808  34
  -1  -5  14 263.628 27.9907  34
  -1  -5  14 192.350 29.6688  20
  -1  -5  14 244.249 36.7620  30
  -1  -5  14 243.524 34.7309   6
  -1  -5  14 270.202 40.2654  39
  -1  -5  13 187.977 36.5359  30
  -1  -5  13 245.118 29.9683  34
  -1  -5  13 258.407 37.2559   6
  -1  -5  12 271.404 37.9551   6
  -1  -5  12 226.225 38.8593  30
  -1  -5  12 271.566 33.0349  34
  -1  -5  11 9838.62 265.012  30
  -1  -5  11 10158.0 249.164  34
  -1  -5  11 9755.43 253.866   6
  -1  -5  10 8148.21 211.682   6
  -1  -5  10 7746.76 209.529  12
  -1  -5  10 7832.40 202.748  11
  -1  -5  10 7345.46 216.216  30
  -1  -5  10 7526.81 203.558  34
  -1  -5   9 4420.61 136.462  33
  -1  -5   9 4512.29 139.319   6
  -1  -5   9 4309.80 147.739  30
  -1  -5   9 4356.69 136.000  34
  -1  -5   9 4519.30 134.376  11
  -1  -5   9 4494.20 141.404  12
  -1  -5   8 14.1189 14.3220  12
  -1  -5   8 36.9024 20.2734  36
  -1  -5   8 26.7426 18.8852   6
  -1  -5   8 20.3396 12.6363  11
  -1  -5   8 27.9671 16.6538  34
  -1  -5   8 54.8857 23.0183  30
  -1  -5   8 41.5273 12.9299  33
  -1  -5   8 69.0151 18.1923  35
  -1  -5   8 20.8487 20.3130  17
  -1  -5   7 31507.4 629.937  35
  -1  -5   7 29842.6 647.863  17
  -1  -5   7 32312.5 646.872  30
  -1  -5   7 29435.8 629.085  11
  -1  -5   7 32484.3 637.186   6
  -1  -5   7 30859.8 636.637  36
  -1  -5   7 30567.7 630.047  33
  -1  -5   7 32307.8 644.452  12
  -1  -5   7 31454.6 634.864  34
  -1  -5   6 8365.48 204.799   6
  -1  -5   6 8204.52 204.129  36
  -1  -5   6 8395.52 204.298  34
  -1  -5   6 7982.45 209.445  30
  -1  -5   6 8043.76 214.487  17
  -1  -5   6 8058.75 317.653  23
  -1  -5   6 8313.34 330.862  44
  -1  -5   6 8257.33 202.847  11
  -1  -5   6 8466.31 210.692  12
  -1  -5   6 8384.61 199.302  35
  -1  -5   5 7230.52 302.316  23
  -1  -5   5 7587.64 188.375  43
  -1  -5   5 7436.72 194.157  17
  -1  -5   5 7397.08 183.663  34
  -1  -5   5 7258.99 188.751  30
  -1  -5   5 7777.67 319.421  44
  -1  -5   5 7461.89 187.316  48
  -1  -5   4 422.344 72.0818  23
  -1  -5   4 447.930 32.5141  42
  -1  -5   4 458.782 34.7150  48
  -1  -5   4 641.924 86.2972  44
  -1  -5   4 458.242 68.9603   3
  -1  -5   4 490.671 35.2383  43
  -1  -5   3 766.167 94.4958  23
  -1  -5   3 711.313 94.6376  44
  -1  -5   3 596.178 37.1838  42
   1   5  -3 563.376 58.3004  45
  -1  -5   3 660.780 40.8861  48
  -1  -5   3 594.913 82.3708   3
  -1  -5   3 573.333 39.1225  43
  -1  -5   2 23.7461 11.9943  43
   1   5  -2 25.7107 18.7327  45
  -1  -5   2 24.0368 35.1773  23
  -1  -5   2 73.9928 14.4495  42
  -1  -5   2 24.6703 10.6406  48
  -1  -5   2 10.6229 28.4625  44
  -1  -5   1 466.262 78.6628  23
  -1  -5   1 528.214 33.6543  42
  -1  -5   1 509.460 80.8220  44
  -1  -5   1 563.704 38.3301  43
  -1  -5   1 530.983 37.5025  48
  -1  -5   1 581.469 79.9033   3
  -1  -5   0 438.768 31.0477  42
  -1  -5   0 345.453 66.5693  23
  -1  -5   0 457.667 33.4688  48
  -1  -5   0 468.534 35.0514  43
  -1  -5   0 357.970 64.6280   3
  -1  -5   0 415.686 72.2643  44
  -1  -5  -1 5464.09 266.722  23
  -1  -5  -1 5471.74 266.931  44
  -1  -5  -1 5567.10 251.003   3
  -1  -5  -1 5323.52 148.256  48
  -1  -5  -1 5421.47 149.422  43
  -1  -5  -1 5695.36 144.642  42
  -1  -5  -2 45155.0 874.300  43
  -1  -5  -2 44171.2 1037.87   3
  -1  -5  -2 42501.6 1059.93  23
  -1  -5  -2 45500.1 873.094  48
  -1  -5  -2 47542.2 1084.66  44
  -1  -5  -2 41471.5 860.777  42
  -1  -5  -3 264155. 5367.65   1
  -1  -5  -3 288759. 5282.60  42
  -1  -5  -3 293871. 5291.51  48
  -1  -5  -3 272512. 5509.76  23
  -1  -5  -3 265134. 5464.84   3
  -1  -5  -3 288218. 5290.76  43
  -1  -5  -4 43127.0 823.408  48
  -1  -5  -4 40396.7 813.596  42
  -1  -5  -4 43059.6 929.800   1
  -1  -5  -4 39834.3 820.753  43
  -1  -5  -4 41025.0 795.896   2
  -1  -5  -4 43727.3 1034.00  44
  -1  -5  -4 39216.5 1010.35  23
  -1  -5  -4 42262.9 995.342   3
  -1  -5  -5 13764.6 305.664  43
  -1  -5  -5 13540.4 462.554  44
  -1  -5  -5 13256.4 438.422   3
  -1  -5  -5 12239.8 448.200  23
  -1  -5  -5 13401.0 285.884   2
  -1  -5  -5 13434.7 406.068   1
  -1  -5  -5 13648.6 299.671  42
  -1  -5  -5 13780.1 306.384  48
  -1  -5  -6 1293.09 59.5980  48
  -1  -5  -6 1127.69 107.770   3
  -1  -5  -6 1213.90 107.302   1
  -1  -5  -6 1295.76 56.6138  42
  -1  -5  -6 1161.38 119.642  23
  -1  -5  -6 1175.63 118.022  44
  -1  -5  -6 1269.29 51.1935   2
  -1  -5  -6 1362.64 60.7618  43
  -1  -5  -7 112826. 2177.17  42
  -1  -5  -7 111312. 2182.31  48
  -1  -5  -7 118979. 2173.64   2
  -1  -5  -7 114484. 2183.15  43
  -1  -5  -7 114112. 2400.49  44
  -1  -5  -7 110784. 2369.19   1
  -1  -5  -7 112948. 2406.94  23
  -1  -5  -8 114.405 18.7928   2
  -1  -5  -8 104.115 45.7159  44
  -1  -5  -8 144.358 43.1501  23
  -1  -5  -8 122.294 20.0850  43
  -1  -5  -8 123.128 20.4004  48
  -1  -5  -8 71.9422 41.7440   1
  -1  -5  -9 318.560 28.8843  43
  -1  -5  -9 219.639 30.6319  41
  -1  -5  -9 271.825 59.7627  44
  -1  -5  -9 229.386 56.0899  23
  -1  -5  -9 414.598 33.2628   2
  -1  -5  -9 230.478 24.3931  48
  -1  -5  -9 219.252 28.9338  22
  -1  -5  -9 333.151 78.7096   1
  -1  -5 -10 2764.49 205.698   1
  -1  -5 -10 2700.22 98.0300   2
  -1  -5 -10 2587.03 104.666  22
  -1  -5 -10 2440.90 105.026  41
  -1  -5 -11 36766.9 999.488   1
  -1  -5 -11 34426.4 734.453  41
  -1  -5 -11 34801.0 718.921   2
  -1  -5 -12 569.806 48.4204   2
  -1  -5 -12 450.453 43.2960  41
  -1  -5 -12 401.643 92.8394   1
  -1  -5 -12 510.213 41.7948   9
   1   5  13 6290.55 336.418  45
  -1  -5 -13 7144.27 197.605   9
  -1  -5 -13 7459.14 205.678   2
   1   5  13 6713.99 205.565  13
  -1  -5 -13 6651.64 200.754  41
   1   5  14 192.261 68.0823  45
  -1  -5 -14 163.146 31.1221   9
  -1  -5 -14 200.728 38.4130   2
   1   5  14 104.231 30.6580  13
   1   5  15 13501.0 349.051  13
  -1  -5 -15 14097.3 338.792   9
  -1  -5 -15 14525.5 347.998   2
  -1  -5 -16 1575.53 79.8075   9
   1   5  16 1461.20 83.8706  13
   1   5  17 126.216 34.5665  13
  -1  -5 -17 87.1705 24.7820  38
  -1  -5 -17 116.918 26.9926   9
   1   5  18 130.545 27.7332  13
  -1  -5 -18 130.675 26.4341   9
  -1  -5 -18 158.190 25.2207  38
  -1  -5 -19 653.367 41.4104   9
   1   5  19 573.558 43.3833  13
  -1  -5 -19 572.788 37.2635  38
   1   5  20 39.1212 14.0661  13
  -1  -5 -20 51.4261 15.0533  25
  -1  -6  15 4740.02 124.487  34
  -1  -6  15 5436.04 143.924  39
  -1  -6  15 5434.17 142.666  29
  -1  -6  15 5190.86 141.542  30
  -1  -6  15 4998.90 134.327  20
  -1  -6  14 6858.64 184.624  29
  -1  -6  14 6772.35 181.909  20
  -1  -6  14 7052.37 174.099  34
  -1  -6  14 6565.08 184.779  30
  -1  -6  13 10.6468 24.7564  29
  -1  -6  13 7.72890 26.3599  39
  -1  -6  13 31.6192 21.4660  20
  -1  -6  13 11.5090 28.3123  30
  -1  -6  13 10.9405 15.8531  34
  -1  -6  12 10336.3 249.476  34
  -1  -6  12 10823.4 263.595  39
  -1  -6  12 10012.1 258.731  20
  -1  -6  12 10303.7 258.096  29
  -1  -6  12 9919.82 254.916   6
  -1  -6  12 9583.76 262.457  30
  -1  -6  11 56.5038 28.1190   6
  -1  -6  11 81.2694 31.2818  39
  -1  -6  11 62.1156 32.6431  30
  -1  -6  11 72.8215 25.0803  29
  -1  -6  11 37.0232 20.6021  34
  -1  -6  10 4389.12 142.817   6
  -1  -6  10 4397.14 143.083  12
  -1  -6  10 4407.07 139.803  34
  -1  -6  10 4281.42 150.862  30
  -1  -6  10 4814.92 149.803  39
  -1  -6   9 5037.20 153.993   6
  -1  -6   9 5083.54 158.761  12
  -1  -6   9 4918.21 162.928  30
  -1  -6   9 5190.52 154.071  34
  -1  -6   9 4984.96 157.193  39
  -1  -6   8 4799.31 149.025  39
  -1  -6   8 4660.40 157.237  17
  -1  -6   8 4831.15 151.435  12
  -1  -6   8 4862.63 146.461   6
  -1  -6   8 4836.90 145.977  34
  -1  -6   8 4767.06 154.948  30
  -1  -6   8 4769.65 139.242  33
  -1  -6   7 489.973 42.1974  12
  -1  -6   7 463.662 41.6969  30
  -1  -6   7 414.558 43.1909  17
  -1  -6   7 528.566 41.7891  34
  -1  -6   7 441.007 38.7065   6
  -1  -6   7 450.924 40.9449  39
  -1  -6   6 10272.1 265.173  17
  -1  -6   6 11195.8 434.257  44
  -1  -6   6 10158.8 406.509  23
  -1  -6   6 10760.6 259.203  43
  -1  -6   6 10514.8 261.892  12
  -1  -6   6 10602.4 253.141  36
  -1  -6   6 10647.4 261.720  30
  -1  -6   6 10395.1 256.527  39
  -1  -6   6 10611.8 255.012  34
  -1  -6   6 10474.2 252.708   6
  -1  -6   5 27.0551 15.4064  48
  -1  -6   5 35.1981 14.3144  36
  -1  -6   5 66.4102 41.7180  23
  -1  -6   5 52.9679 18.4241  12
  -1  -6   5 68.1823 56.9733  44
  -1  -6   5 42.6394 17.9632  43
  -1  -6   5 53.7257 17.6074  39
  -1  -6   5 30.9708 17.2133  30
  -1  -6   5 44.4083 15.8031  34
  -1  -6   5 51.8991 22.4444  17
  -1  -6   4 41146.7 817.362  17
  -1  -6   4 40672.1 799.652  29
  -1  -6   4 39886.6 808.067  30
  -1  -6   4 42223.2 1074.24  44
  -1  -6   4 39192.7 823.572  10
  -1  -6   4 40006.1 819.709  48
  -1  -6   4 40728.6 823.657  24
  -1  -6   4 39568.9 820.630   5
  -1  -6   4 40346.4 809.097  39
  -1  -6   4 40297.9 1047.38  23
  -1  -6   4 39812.1 820.102  43
  -1  -6   4 39807.6 815.418  21
  -1  -6   4 42383.8 819.562  12
  -1  -6   4 40775.3 806.536  34
  -1  -6   4 40656.8 800.291  36
  -1  -6   3 162.627 23.6995  12
  -1  -6   3 130.620 21.0011  34
  -1  -6   3 175.353 21.8611  30
  -1  -6   3 193.897 24.1431  39
  -1  -6   3 222.345 62.6679  44
  -1  -6   3 134.081 21.6069  42
  -1  -6   3 159.568 25.7904  48
  -1  -6   3 160.521 25.0915  43
  -1  -6   3 163.531 23.1076  17
  -1  -6   3 189.551 66.3055  23
  -1  -6   3 137.579 51.4526   3
  -1  -6   2 1372.17 59.6880  34
  -1  -6   2 1412.61 63.7884  42
  -1  -6   2 1384.66 142.013  23
  -1  -6   2 1161.54 122.726   3
  -1  -6   2 1363.74 69.4646  43
  -1  -6   2 1503.19 67.6059  12
  -1  -6   2 1425.22 70.2444  48
  -1  -6   2 1397.24 148.371  44
  -1  -6   2 1412.29 62.3983  20
   1   6  -2 1478.12 111.653  45
  -1  -6   2 1364.85 61.2461  39
  -1  -6   1 5055.04 155.009  48
  -1  -6   1 5537.25 150.718  42
   1   6  -1 5424.78 237.183  45
  -1  -6   1 5143.08 290.487  44
  -1  -6   1 5432.65 274.130   3
  -1  -6   1 5373.28 158.408  43
  -1  -6   1 5187.04 285.480  23
  -1  -6   0 27172.7 565.906  48
  -1  -6   0 27617.3 794.314  23
  -1  -6   0 27703.7 754.427   3
  -1  -6   0 26224.2 788.927  44
  -1  -6   0 26626.8 552.309  42
  -1  -6   0 25761.7 562.232  43
  -1  -6  -1 8644.39 391.302  23
  -1  -6  -1 9123.83 369.578   3
  -1  -6  -1 9077.10 234.024  43
  -1  -6  -1 9211.93 234.339  48
  -1  -6  -1 9369.15 225.639  42
  -1  -6  -1 9072.15 399.413  44
  -1  -6  -2 3588.39 122.954  43
  -1  -6  -2 3881.09 226.322   3
  -1  -6  -2 3453.87 234.509  23
  -1  -6  -2 3843.63 247.377  44
  -1  -6  -2 3922.47 125.574  48
  -1  -6  -2 3586.07 114.233  42
  -1  -6  -3 4832.33 147.710  48
  -1  -6  -3 5024.49 149.514  43
  -1  -6  -3 4656.31 274.493  23
  -1  -6  -3 4618.48 254.925   3
  -1  -6  -3 4903.56 280.172  44
  -1  -6  -3 4847.13 140.488  42
  -1  -6  -4 26808.3 551.312  43
  -1  -6  -4 25870.3 538.941  42
  -1  -6  -4 25036.2 546.565  48
  -1  -6  -4 24277.1 759.372  23
  -1  -6  -4 25847.1 775.210  44
  -1  -6  -4 25695.5 735.890   3
  -1  -6  -5 4398.50 247.854   3
  -1  -6  -5 4071.78 257.729  23
  -1  -6  -5 4423.34 138.255  48
  -1  -6  -5 4319.07 130.567  42
  -1  -6  -5 4453.29 210.829   1
  -1  -6  -5 4411.49 265.085  44
  -1  -6  -5 4251.62 114.155   2
  -1  -6  -5 4396.54 137.514  43
  -1  -6  -6 1415.49 69.6336  43
  -1  -6  -6 1468.99 123.749   1
  -1  -6  -6 1409.28 65.0857  42
  -1  -6  -6 1324.97 65.4864  19
  -1  -6  -6 1364.78 73.4146  22
  -1  -6  -6 1145.13 135.239  23
  -1  -6  -6 1443.70 70.0112  48
  -1  -6  -6 1397.02 65.4743  38
  -1  -6  -6 1364.36 66.9982  39
  -1  -6  -6 1426.45 140.095   3
  -1  -6  -6 1302.42 54.3017   2
  -1  -6  -6 1312.25 146.499  44
  -1  -6  -6 1421.45 63.7052  34
  -1  -6  -6 1302.07 70.8769  41
  -1  -6  -7 6095.11 164.177  42
  -1  -6  -7 5905.92 168.947  48
  -1  -6  -7 6165.62 280.034   1
  -1  -6  -7 5572.29 171.759  39
  -1  -6  -7 5949.15 165.706  34
  -1  -6  -7 5594.00 178.310  22
  -1  -6  -7 5822.00 177.793  41
  -1  -6  -7 5910.47 152.093   2
  -1  -6  -7 5748.42 167.995  43
  -1  -6  -7 5477.15 304.663  23
  -1  -6  -7 5896.20 159.594  18
  -1  -6  -7 5768.71 171.582  19
  -1  -6  -7 5705.54 308.647  44
  -1  -6  -7 6082.15 295.630   3
  -1  -6  -8 16008.8 570.716  44
  -1  -6  -8 16998.3 370.433  21
  -1  -6  -8 16119.7 573.364  23
  -1  -6  -8 15770.8 380.648  24
  -1  -6  -8 16536.7 395.372  22
  -1  -6  -8 16721.1 393.518  41
  -1  -6  -8 17615.8 364.908   2
  -1  -6  -8 16447.5 376.551  43
  -1  -6  -8 15678.5 385.644  10
  -1  -6  -8 17048.7 376.161   5
  -1  -6  -8 17904.2 559.254   1
  -1  -6  -8 16397.0 376.583  48
  -1  -6  -9 3292.38 225.403  23
  -1  -6  -9 3527.51 228.827   1
  -1  -6  -9 3551.95 112.105   2
  -1  -6  -9 3378.72 130.704  22
  -1  -6  -9 3452.50 130.452  41
  -1  -6  -9 3136.27 114.408  43
  -1  -6  -9 3319.64 115.940  48
  -1  -6  -9 3204.41 225.146  44
  -1  -6 -10 1071.10 68.8269  22
  -1  -6 -10 1204.82 141.560   1
  -1  -6 -10 1221.58 136.250  23
  -1  -6 -10 1174.53 72.9304  41
  -1  -6 -10 973.514 120.378  44
  -1  -6 -10 1074.86 59.8341   2
  -1  -6 -11 922.778 135.125   1
  -1  -6 -11 951.544 52.6409   9
  -1  -6 -11 891.826 64.0582  41
  -1  -6 -11 788.438 60.8034  22
  -1  -6 -11 958.603 58.2174   2
  -1  -6 -12 2957.56 123.530  22
  -1  -6 -12 3322.65 120.535   2
   1   6  12 3328.35 124.149  13
  -1  -6 -12 3147.01 129.105  41
  -1  -6 -12 3290.02 110.979   9
  -1  -6 -13 12747.0 310.429   2
  -1  -6 -13 12219.6 319.750  41
  -1  -6 -13 12501.0 297.686   9
   1   6  13 11888.8 503.801  45
   1   6  13 12460.7 314.266  13
   1   6  14 14898.8 571.507  45
  -1  -6 -14 15784.7 365.917   2
   1   6  14 14888.5 366.687  13
  -1  -6 -14 15119.0 350.958   9
  -1  -6 -14 15036.0 366.734  41
  -1  -6 -15 313.955 44.1288  38
  -1  -6 -15 298.368 34.8134   9
   1   6  15 287.613 38.0483  13
   1   6  16 25304.7 556.243  13
  -1  -6 -16 25867.6 555.062  38
  -1  -6 -16 25387.6 539.206   9
  -1  -6 -17 500.236 44.5189  38
  -1  -6 -17 572.531 41.2424   9
   1   6  17 538.574 45.1636  13
  -1  -6 -18 1568.88 69.0642  38
   1   6  18 1463.43 68.2453  13
   1   6  19 909.675 46.6954  13
  -1  -6 -19 827.799 42.7631  38
  -1  -7  14 3.44082 13.3886  20
  -1  -7  14 15.4265 18.0593  39
  -1  -7  14 20.1512 17.4375  30
  -1  -7  14 17.1721 11.0534  34
  -1  -7  14 15.9327 15.4990  29
  -1  -7  13 934.577 54.6385  20
  -1  -7  13 973.892 48.7619  34
  -1  -7  13 933.366 55.8055  39
  -1  -7  13 1007.37 54.3190  29
  -1  -7  13 928.629 55.5222  30
  -1  -7  12 585.644 48.4980  39
  -1  -7  12 653.983 52.4799  30
  -1  -7  12 631.318 47.6947  29
  -1  -7  12 701.797 45.3275  34
  -1  -7  12 652.959 49.8411  20
  -1  -7  11 7402.30 199.364  29
  -1  -7  11 7651.50 198.761  34
  -1  -7  11 7664.84 207.637  39
  -1  -7  11 7326.80 207.730  30
  -1  -7  11 7329.06 207.062  20
  -1  -7  10 1461.16 71.7410  34
  -1  -7  10 1437.44 71.8948  29
  -1  -7  10 1458.79 78.3012  30
  -1  -7  10 1343.46 71.2768  12
  -1  -7  10 1583.25 79.8289  39
  -1  -7  10 1484.21 79.9902  20
  -1  -7   9 618.915 54.2956  20
  -1  -7   9 603.493 52.3205  30
  -1  -7   9 631.889 47.8514  29
  -1  -7   9 615.855 49.2175  12
  -1  -7   9 618.968 52.1816  39
  -1  -7   9 651.271 49.2836  34
  -1  -7   8 1922.83 90.1124  39
  -1  -7   8 2028.29 93.7334  20
  -1  -7   8 2073.71 98.2169  17
  -1  -7   8 2113.80 86.7553  29
  -1  -7   8 1930.29 91.0685  12
  -1  -7   8 1964.66 87.2094  34
  -1  -7   8 2043.05 94.4959  30
  -1  -7   7 49387.5 1001.00  29
  -1  -7   7 50408.9 1013.52  39
  -1  -7   7 52059.4 1018.40  30
  -1  -7   7 51781.6 1010.57  34
  -1  -7   7 50044.7 1022.23  17
  -1  -7   7 51694.1 1021.34  20
  -1  -7   6 431.512 43.0547  20
  -1  -7   6 382.233 39.3191  30
  -1  -7   6 405.658 36.7184  29
  -1  -7   6 439.686 43.9051  39
  -1  -7   6 341.040 41.2855  17
  -1  -7   6 444.346 43.1823  12
  -1  -7   6 469.008 42.0855  34
  -1  -7   5 10147.3 266.910  24
  -1  -7   5 9919.18 261.760   5
  -1  -7   5 11371.9 488.015  44
  -1  -7   5 10502.8 248.316  29
  -1  -7   5 10205.0 256.615  30
  -1  -7   5 10397.8 272.175  10
  -1  -7   5 10675.6 270.920  43
  -1  -7   5 10571.9 257.256  34
  -1  -7   5 10335.9 263.164  20
  -1  -7   5 9852.48 445.236  23
  -1  -7   5 10334.4 264.970  12
  -1  -7   5 10164.1 263.424  17
  -1  -7   5 10203.3 257.706  21
  -1  -7   5 10541.6 260.818  39
  -1  -7   5 10314.8 267.947  48
  -1  -7   4 3453.94 126.823  48
  -1  -7   4 3514.10 120.747  17
  -1  -7   4 3401.58 121.291  12
  -1  -7   4 3383.39 107.368  29
  -1  -7   4 3296.05 111.861  30
  -1  -7   4 3447.61 118.505  39
  -1  -7   4 3286.65 124.768  43
  -1  -7   4 3326.38 121.957   5
  -1  -7   4 3282.51 244.836  23
  -1  -7   4 3246.64 126.159  10
  -1  -7   4 3289.27 118.043  21
  -1  -7   4 3434.82 120.347  20
  -1  -7   4 3491.29 126.867  24
  -1  -7   4 3244.64 254.535  44
  -1  -7   4 3300.44 113.747  34
  -1  -7   3 28355.5 568.612  17
  -1  -7   3 26397.0 562.825  39
  -1  -7   3 25729.3 583.455  10
  -1  -7   3 26712.4 559.641  34
  -1  -7   3 27374.4 864.195  44
  -1  -7   3 26550.0 575.967   5
  -1  -7   3 26098.3 546.185  29
  -1  -7   3 27127.1 583.977  43
  -1  -7   3 28102.2 568.747  20
  -1  -7   3 26170.9 569.164  21
  -1  -7   3 27224.7 572.278  12
  -1  -7   3 26069.9 554.276  30
  -1  -7   3 25478.3 825.178  23
  -1  -7   3 26583.2 581.452  48
  -1  -7   3 25980.8 579.171  24
  -1  -7   2 449.914 39.9435  39
  -1  -7   2 395.265 34.1038  34
  -1  -7   2 310.710 88.5915  44
  -1  -7   2 448.016 33.9525  30
  -1  -7   2 426.792 42.7022  10
  -1  -7   2 395.864 37.0193  42
  -1  -7   2 411.192 39.0290  22
  -1  -7   2 460.453 38.0992  17
  -1  -7   2 308.435 80.7434   3
  -1  -7   2 471.348 40.8554  12
  -1  -7   2 465.336 45.3312  43
  -1  -7   2 405.342 42.8963  48
  -1  -7   2 466.376 40.7928  21
  -1  -7   2 458.021 39.8466  20
  -1  -7   2 419.597 43.2221  24
  -1  -7   2 411.028 41.7801   5
  -1  -7   2 470.059 95.3846  23
  -1  -7   1 12793.6 307.626  38
  -1  -7   1 12608.0 317.842  22
  -1  -7   1 13508.6 316.744  12
  -1  -7   1 13225.1 499.202   3
  -1  -7   1 13143.2 326.718  24
  -1  -7   1 12961.5 328.992  10
   1   7  -1 13762.0 445.247  45
  -1  -7   1 13590.5 306.110  34
  -1  -7   1 12471.2 527.389  23
  -1  -7   1 12911.1 312.820  41
  -1  -7   1 13321.2 328.046  43
  -1  -7   1 13080.6 316.045  21
  -1  -7   1 13172.7 308.220  20
  -1  -7   1 13883.2 313.740  42
  -1  -7   1 13202.8 549.388  44
  -1  -7   1 13125.8 321.063   5
  -1  -7   1 13641.1 309.063  39
  -1  -7   1 12974.4 326.231  48
   1   7   0 13604.4 464.214  45
  -1  -7   0 12724.4 315.459  38
  -1  -7   0 14097.5 317.772  20
  -1  -7   0 14390.8 324.860  42
  -1  -7   0 14092.1 338.711  48
  -1  -7   0 13622.2 559.900  44
  -1  -7   0 13573.7 325.087  21
  -1  -7   0 13314.8 338.024  10
  -1  -7   0 13233.5 324.030  41
  -1  -7   0 13863.8 518.154   3
  -1  -7   0 13210.6 546.329  23
  -1  -7   0 13851.8 337.273  24
  -1  -7   0 13639.2 332.237  22
  -1  -7   0 14554.6 317.829  39
  -1  -7   0 14719.1 330.083  12
  -1  -7   0 13058.5 311.544  34
  -1  -7   0 13455.6 335.315  43
  -1  -7   0 13471.0 328.904   5
  -1  -7  -1 20039.3 406.411  39
  -1  -7  -1 18930.8 428.109  22
  -1  -7  -1 17926.6 413.507  21
  -1  -7  -1 17857.5 418.618   5
  -1  -7  -1 18487.7 416.917  12
  -1  -7  -1 18059.5 427.338  24
  -1  -7  -1 19128.4 414.916  42
  -1  -7  -1 18587.0 427.758  48
  -1  -7  -1 18555.4 403.985  34
  -1  -7  -1 18567.9 406.984  20
  -1  -7  -1 18800.9 677.100  44
  -1  -7  -1 18547.1 427.348  43
  -1  -7  -1 17995.9 417.748  41
  -1  -7  -1 17980.9 408.528  38
  -1  -7  -1 18913.9 629.098   3
  -1  -7  -1 17766.8 659.699  23
  -1  -7  -1 17985.4 430.020  10
  -1  -7  -2 308.167 37.2692  48
  -1  -7  -2 359.835 34.5471  38
  -1  -7  -2 292.113 77.8690  44
  -1  -7  -2 326.104 33.8489  21
  -1  -7  -2 373.933 39.7212  22
  -1  -7  -2 358.658 37.1985  41
  -1  -7  -2 348.643 32.2540  20
  -1  -7  -2 364.118 31.7261  39
  -1  -7  -2 339.053 39.7601  10
  -1  -7  -2 316.064 35.4633  42
  -1  -7  -2 368.323 37.9609   5
  -1  -7  -2 382.507 95.0185  23
  -1  -7  -2 381.305 35.3315  18
  -1  -7  -2 333.058 37.4256  43
  -1  -7  -2 202.074 72.2806   3
  -1  -7  -2 367.356 33.2666  34
  -1  -7  -2 377.096 40.9320  24
  -1  -7  -2 376.557 37.5925  12
  -1  -7  -3 6546.87 336.402   3
  -1  -7  -3 6907.23 199.974  48
  -1  -7  -3 5803.98 348.280  23
  -1  -7  -3 6589.86 195.189  41
  -1  -7  -3 6664.80 182.933  18
  -1  -7  -3 6428.65 199.161  24
  -1  -7  -3 6993.56 200.862  43
  -1  -7  -3 6459.73 200.516  10
  -1  -7  -3 6856.92 180.346  34
  -1  -7  -3 6549.66 367.061  44
  -1  -7  -3 6958.41 179.210  39
  -1  -7  -3 7023.68 194.833   5
  -1  -7  -3 6914.37 202.573  22
  -1  -7  -3 6368.07 190.108  12
  -1  -7  -3 6721.24 189.277  21
  -1  -7  -3 6757.71 186.933  42
  -1  -7  -3 6806.47 185.255  38
  -1  -7  -4 8462.41 215.560  39
  -1  -7  -4 8486.72 224.047  42
  -1  -7  -4 8350.56 210.300  32
  -1  -7  -4 8424.39 238.552  24
  -1  -7  -4 8611.59 218.887  18
  -1  -7  -4 8634.17 229.508   5
  -1  -7  -4 8528.52 222.220  38
  -1  -7  -4 8746.06 236.521  43
  -1  -7  -4 8815.09 218.092  19
  -1  -7  -4 8451.10 231.944  12
  -1  -7  -4 8246.29 419.136  44
  -1  -7  -4 8010.66 414.135  23
  -1  -7  -4 8567.36 391.075   3
  -1  -7  -4 8396.05 239.461  22
  -1  -7  -4 8779.78 236.941  48
  -1  -7  -4 9121.91 217.149  34
  -1  -7  -4 8059.75 237.353  10
  -1  -7  -4 9054.22 228.648  21
  -1  -7  -4 8272.06 233.240  41
  -1  -7  -5 2789.61 111.106  43
  -1  -7  -5 2691.54 227.891  44
  -1  -7  -5 2706.47 98.2234  18
  -1  -7  -5 2855.53 113.291  41
  -1  -7  -5 2455.63 95.4187  19
  -1  -7  -5 2651.23 102.379  21
  -1  -7  -5 2434.15 106.048  12
  -1  -7  -5 2903.28 98.7767  34
  -1  -7  -5 2844.06 103.392  38
  -1  -7  -5 2628.03 111.002  24
  -1  -7  -5 2572.36 97.9048  39
  -1  -7  -5 2534.65 110.738  22
  -1  -7  -5 2700.60 103.083  42
  -1  -7  -5 2708.42 110.424  48
  -1  -7  -5 2646.12 93.3933  32
  -1  -7  -5 2612.02 113.180  10
  -1  -7  -5 2666.53 210.354   3
  -1  -7  -5 2655.71 105.891   5
  -1  -7  -5 2333.52 216.759  23
  -1  -7  -6 1814.23 76.4971  18
  -1  -7  -6 1692.98 84.4351  43
  -1  -7  -6 1734.13 88.9427  41
  -1  -7  -6 1702.11 182.512  44
  -1  -7  -6 1843.80 81.0962  38
  -1  -7  -6 1650.58 86.4858  24
  -1  -7  -6 1786.87 80.9945  21
  -1  -7  -6 1798.15 76.7318  34
  -1  -7  -6 1789.71 87.1992  48
  -1  -7  -6 1842.62 85.1186   5
  -1  -7  -6 1792.10 65.8438   2
  -1  -7  -6 1793.10 172.488   3
  -1  -7  -6 1648.17 78.8289  19
  -1  -7  -6 1696.11 179.201  23
  -1  -7  -6 1677.39 88.7560  10
  -1  -7  -6 1761.44 81.1085  39
  -1  -7  -6 1728.40 79.8609  42
  -1  -7  -6 1699.35 90.1294  22
  -1  -7  -7 19836.2 438.137   5
  -1  -7  -7 19817.9 431.964  21
  -1  -7  -7 18316.9 445.751  24
  -1  -7  -7 18996.4 441.617  48
  -1  -7  -7 20169.8 432.011  34
  -1  -7  -7 18310.9 681.327  23
  -1  -7  -7 19604.6 424.170  18
  -1  -7  -7 19470.0 433.431  38
  -1  -7  -7 18223.4 676.579  44
  -1  -7  -7 18667.8 454.695  22
  -1  -7  -7 19595.2 410.056   2
  -1  -7  -7 18188.6 449.238  10
  -1  -7  -7 19383.3 438.901  19
  -1  -7  -7 19502.5 443.438  43
  -1  -7  -7 20035.3 454.114  41
  -1  -7  -7 19552.9 441.358  39
  -1  -7  -8 23449.8 796.530  23
  -1  -7  -8 25257.6 512.550   2
  -1  -7  -8 24402.2 531.718   5
  -1  -7  -8 23353.1 793.698  44
  -1  -7  -8 23795.2 554.946  22
  -1  -7  -8 24342.5 552.290  41
  -1  -7  -8 26379.2 536.635  38
  -1  -7  -8 23082.2 546.386  10
  -1  -7  -8 24393.2 539.058  43
  -1  -7  -8 25194.6 527.113  21
  -1  -7  -8 23319.1 542.494  24
  -1  -7  -8 24222.2 537.326  48
  -1  -7  -8 24698.2 544.984  39
  -1  -7  -8 24326.5 520.980  18
  -1  -7  -9 8473.06 213.001   2
  -1  -7  -9 8970.39 231.450  38
  -1  -7  -9 8070.86 232.459  24
  -1  -7  -9 8270.58 228.402  48
  -1  -7  -9 7953.44 243.378  22
  -1  -7  -9 8298.79 243.200  41
  -1  -7  -9 7271.84 394.842  23
  -1  -7  -9 8033.85 228.367  43
  -1  -7  -9 8554.61 223.955   5
  -1  -7  -9 8093.91 237.229  10
  -1  -7  -9 8318.22 417.396  44
  -1  -7  -9 8809.50 220.028  21
  -1  -7 -10 34337.2 728.531  38
  -1  -7 -10 34542.9 727.132  48
  -1  -7 -10 34931.5 713.712   2
  -1  -7 -10 33727.5 1002.40  23
  -1  -7 -10 36896.6 757.439  41
  -1  -7 -10 33447.4 751.965  22
   1   7  11 81675.5 1573.14  13
  -1  -7 -11 82348.7 1571.02   2
  -1  -7 -11 82083.5 1608.06  41
  -1  -7 -11 79875.8 1582.95  38
  -1  -7 -12 6789.27 203.065  38
  -1  -7 -12 6841.41 193.154   2
  -1  -7 -12 6483.07 210.164  41
  -1  -7 -12 6725.53 214.900  22
   1   7  12 6780.84 377.905  45
   1   7  12 6861.63 194.677  13
  -1  -7 -13 6227.00 191.921  38
   1   7  13 6606.81 187.703  13
   1   7  13 6483.09 363.145  45
  -1  -7 -13 5948.46 195.530  22
  -1  -7 -13 6301.93 186.203   2
  -1  -7 -13 6510.14 203.638  41
  -1  -7 -14 5527.33 154.538   9
   1   7  14 5949.11 172.044  13
  -1  -7 -14 5551.83 177.335  38
  -1  -7 -14 5665.97 181.992  41
  -1  -7 -15 64446.6 1284.30   9
   1   7  15 66248.0 1304.38  13
  -1  -7 -15 64206.0 1312.52  38
  -1  -7 -15 68075.4 1315.22  41
   1   7  16 241.467 29.5155  13
  -1  -7 -16 313.965 38.4227  38
  -1  -7 -17 2711.28 100.531  38
   1   7  17 2726.51 93.5604  13
  -1  -7 -18 317.755 29.9131  38
   1   7  18 251.193 24.0196  13
  -1  -7 -19 252.855 21.3550  38
  -1  -7 -19 254.344 25.2262  32
   1   7  19 242.731 18.4403  13
  -1  -7 -19 276.510 26.2057  25
  -1  -8  13 575.128 33.2788  29
  -1  -8  13 564.726 35.5502  20
  -1  -8  13 544.300 35.1717  30
  -1  -8  13 487.660 29.2754  34
  -1  -8  13 568.674 36.9842  39
  -1  -8  12 3114.36 98.3209  34
  -1  -8  12 3286.81 108.402  20
  -1  -8  12 3403.89 106.612  30
  -1  -8  12 3381.60 108.860  39
  -1  -8  12 3227.76 99.5922  29
  -1  -8  11 444.473 36.3821  34
  -1  -8  11 411.872 34.8914  29
  -1  -8  11 477.458 44.1836  39
  -1  -8  11 466.045 43.0206  20
  -1  -8  11 498.667 43.0986  30
  -1  -8  10 2935.93 109.216  30
  -1  -8  10 2891.33 100.249  29
  -1  -8  10 2908.12 104.063  12
  -1  -8  10 2824.35 108.903  39
  -1  -8  10 2906.63 112.453  20
  -1  -8  10 2871.96 102.777  34
  -1  -8   9 3180.33 113.144  34
  -1  -8   9 3072.50 106.896  29
  -1  -8   9 2926.08 112.356  12
  -1  -8   9 3082.96 117.454  39
  -1  -8   9 3156.93 107.192  18
  -1  -8   9 3212.05 121.003  20
  -1  -8   9 3251.14 117.209  30
  -1  -8   8 1906.48 87.6870  30
  -1  -8   8 1799.43 83.6980  34
  -1  -8   8 1805.95 78.8307  29
  -1  -8   8 1768.66 87.0395  39
  -1  -8   8 1839.49 81.9148  18
  -1  -8   8 1826.82 89.3555  20
  -1  -8   8 1666.17 85.8135  12
  -1  -8   7 7722.97 216.064  17
  -1  -8   7 7593.05 212.472  39
  -1  -8   7 7381.97 214.966  20
  -1  -8   7 7410.31 206.584  30
  -1  -8   7 7221.62 195.777  29
  -1  -8   7 7524.68 213.973  12
  -1  -8   7 7356.85 205.628  34
  -1  -8   6 8054.82 218.340  34
  -1  -8   6 7635.15 204.078  29
  -1  -8   6 8286.31 227.878  12
  -1  -8   6 8184.90 225.021  17
  -1  -8   6 8038.72 215.099  30
  -1  -8   6 7589.32 222.575  20
  -1  -8   6 7791.63 219.749  39
  -1  -8   5 7112.96 185.844  29
  -1  -8   5 6451.68 196.402  39
  -1  -8   5 7004.09 193.342  30
  -1  -8   5 7283.97 208.058  12
  -1  -8   5 6428.52 198.800  17
  -1  -8   5 6553.82 378.613  23
  -1  -8   5 6759.88 206.278  24
  -1  -8   5 7225.10 207.070  20
  -1  -8   5 7514.47 204.963  34
  -1  -8   5 7034.46 195.518  21
  -1  -8   4 17114.3 394.847  34
  -1  -8   4 16890.0 397.241  21
  -1  -8   4 17751.3 699.904  44
  -1  -8   4 17394.1 416.298  43
  -1  -8   4 16895.4 386.109  30
  -1  -8   4 17974.1 405.445  20
  -1  -8   4 17441.8 416.211  48
  -1  -8   4 17456.4 406.886  12
  -1  -8   4 17327.9 405.145   5
  -1  -8   4 17789.3 399.848  39
  -1  -8   4 16884.2 412.162  24
  -1  -8   4 15757.7 646.006  23
  -1  -8   4 17220.5 398.710  17
  -1  -8   3 84.3497 25.9613  34
  -1  -8   3 90.9793 30.7185  48
  -1  -8   3 109.062 25.9056  17
  -1  -8   3 155.797 29.1993  21
  -1  -8   3 86.3631 29.2027  20
  -1  -8   3 137.757 33.3586  43
  -1  -8   3 100.066 31.1283  24
  -1  -8   3 150.549 81.7175  44
  -1  -8   3 117.839 29.8457  39
  -1  -8   3 97.9886 26.2501  10
  -1  -8   3 103.657 21.6532  30
  -1  -8   3 85.0674 53.3362  23
  -1  -8   3 116.120 32.0814  12
  -1  -8   3 156.591 30.1174   5
  -1  -8   2 11319.0 292.965  22
  -1  -8   2 11328.4 309.261  10
  -1  -8   2 11824.9 310.151  48
  -1  -8   2 11272.7 304.231  24
  -1  -8   2 11797.8 297.597  12
  -1  -8   2 11060.1 543.912  44
  -1  -8   2 11490.2 308.095  43
  -1  -8   2 11827.0 299.855   5
  -1  -8   2 11391.4 269.428  30
  -1  -8   2 11667.5 283.709  17
  -1  -8   2 11089.7 281.270  34
  -1  -8   2 11554.4 289.038  20
  -1  -8   2 11891.9 294.360  21
  -1  -8   2 10241.2 510.168  23
  -1  -8   2 11838.6 286.097  39
  -1  -8   1 547.469 49.0645  21
  -1  -8   1 487.071 43.2898  34
  -1  -8   1 335.260 95.2317  44
  -1  -8   1 519.309 43.5882  38
  -1  -8   1 479.097 46.2545  22
  -1  -8   1 463.593 46.0274   5
  -1  -8   1 537.362 112.931  23
  -1  -8   1 522.343 54.0772  48
  -1  -8   1 541.705 107.728   3
  -1  -8   1 571.912 44.9732  17
  -1  -8   1 526.808 45.9176  20
  -1  -8   1 638.461 58.7656  43
  -1  -8   1 472.517 44.1708  41
  -1  -8   1 489.560 52.2925  10
  -1  -8   1 549.978 49.1719  12
  -1  -8   1 525.579 46.8898  42
  -1  -8   1 525.023 43.9719  39
  -1  -8   1 552.327 53.7778  24
  -1  -8   0 29007.6 618.139  34
  -1  -8   0 28925.5 638.436   5
  -1  -8   0 30194.0 652.467  24
  -1  -8   0 29306.3 654.718  10
   1   8   0 30663.2 824.212  45
  -1  -8   0 29138.3 641.290  22
  -1  -8   0 31239.9 915.575   3
  -1  -8   0 30913.4 621.228  39
  -1  -8   0 25834.6 938.774  44
  -1  -8   0 29914.8 633.614  21
  -1  -8   0 30715.8 639.876  12
  -1  -8   0 29363.6 629.762  42
  -1  -8   0 28896.2 633.178  41
  -1  -8   0 28741.9 954.612  23
  -1  -8   0 30197.3 624.064  20
  -1  -8   0 30556.1 616.527  17
  -1  -8   0 29184.6 649.837  48
  -1  -8   0 27808.0 621.874  18
  -1  -8   0 28877.0 622.491  38
  -1  -8   0 27955.9 647.507  43
   1   8   1 2458.37 191.768  45
  -1  -8  -1 2613.24 100.692  20
  -1  -8  -1 2464.54 108.632   5
  -1  -8  -1 2476.50 116.833  10
  -1  -8  -1 2502.08 240.883  23
  -1  -8  -1 2740.11 226.786   3
  -1  -8  -1 2591.85 99.4719  34
  -1  -8  -1 2463.15 106.750  12
  -1  -8  -1 2426.30 114.318  43
  -1  -8  -1 2485.53 113.581  24
  -1  -8  -1 2548.45 101.588  38
  -1  -8  -1 2561.86 97.1266  39
  -1  -8  -1 2590.03 107.404  21
  -1  -8  -1 2560.78 112.888  22
  -1  -8  -1 2411.40 114.435  48
  -1  -8  -1 2448.59 247.667  44
  -1  -8  -1 2589.86 109.107  41
  -1  -8  -1 2660.69 108.036  42
  -1  -8  -1 2359.39 99.8831  18
  -1  -8  -2 7054.78 215.801  43
  -1  -8  -2 6806.40 206.565  41
  -1  -8  -2 7031.91 371.336   3
  -1  -8  -2 6980.14 196.292  38
  -1  -8  -2 6962.35 214.410  22
  -1  -8  -2 6771.15 404.403  23
  -1  -8  -2 7325.45 191.389  39
  -1  -8  -2 6812.93 213.357  48
  -1  -8  -2 6736.27 194.729  18
  -1  -8  -2 6782.92 410.894  44
  -1  -8  -2 6999.62 191.329  34
  -1  -8  -2 7138.53 217.930  24
  -1  -8  -2 6954.97 201.778  21
  -1  -8  -2 6707.78 204.790   5
  -1  -8  -2 6987.10 219.702  10
  -1  -8  -2 7271.57 203.104  42
  -1  -8  -2 6993.23 207.221  12
  -1  -8  -3 1478.06 85.6494  48
  -1  -8  -3 1225.82 80.7258  10
  -1  -8  -3 1277.80 80.6763  24
  -1  -8  -3 1410.58 75.9250  42
  -1  -8  -3 1447.42 73.9341  38
  -1  -8  -3 1476.28 66.0452  32
  -1  -8  -3 1352.47 68.2004  19
  -1  -8  -3 1419.25 85.3304  22
  -1  -8  -3 1401.38 72.6941  18
  -1  -8  -3 1441.54 86.2054  43
  -1  -8  -3 1421.80 78.7481  12
  -1  -8  -3 1484.31 78.0620  21
  -1  -8  -3 1435.79 70.7391  34
  -1  -8  -3 1465.10 69.6478  39
  -1  -8  -3 1739.30 209.617  44
  -1  -8  -3 1457.49 81.1884  41
  -1  -8  -3 1342.79 179.423  23
  -1  -8  -3 1270.74 153.809   3
  -1  -8  -3 1380.11 78.4734   5
  -1  -8  -4 29159.1 599.815  34
  -1  -8  -4 30198.6 901.940   3
  -1  -8  -4 29358.8 609.865  38
  -1  -8  -4 25850.6 914.880  23
  -1  -8  -4 29101.0 956.454  44
  -1  -8  -4 26905.8 619.478  12
  -1  -8  -4 28153.9 590.454  32
  -1  -8  -4 29712.0 630.508  41
  -1  -8  -4 28226.7 600.133  19
  -1  -8  -4 28863.2 599.976  39
  -1  -8  -4 27338.0 628.911  24
  -1  -8  -4 28107.9 611.334  21
  -1  -8  -4 27300.3 608.657  42
  -1  -8  -4 29485.1 605.705  18
  -1  -8  -4 29156.8 621.428   5
  -1  -8  -4 28747.7 635.557  22
  -1  -8  -4 27831.9 628.718  48
  -1  -8  -4 28834.2 632.119  43
  -1  -8  -4 27475.8 635.008  10
  -1  -8  -5 1331.82 68.4851  18
  -1  -8  -5 1202.29 61.9449  32
  -1  -8  -5 1221.84 171.391  44
  -1  -8  -5 1218.04 66.2342  34
  -1  -8  -5 1206.17 68.8457  21
  -1  -8  -5 1107.54 76.1447  22
  -1  -8  -5 1221.31 79.0581  43
  -1  -8  -5 1275.28 79.2018  48
  -1  -8  -5 1157.72 166.825  23
  -1  -8  -5 1146.16 77.5093  10
  -1  -8  -5 1260.35 67.4022  19
  -1  -8  -5 1099.42 69.4132   5
  -1  -8  -5 1204.31 70.5150  42
  -1  -8  -5 1152.34 76.7161  24
  -1  -8  -5 1184.77 65.1720  39
  -1  -8  -5 1172.96 67.8861  38
  -1  -8  -5 1139.45 74.7517  41
  -1  -8  -6 3776.38 122.027  32
  -1  -8  -6 3445.29 139.751  24
  -1  -8  -6 3721.82 142.552  48
  -1  -8  -6 3578.54 124.674  34
  -1  -8  -6 3616.69 146.511  10
  -1  -8  -6 3606.40 292.720  44
  -1  -8  -6 3685.69 141.001  43
  -1  -8  -6 3710.24 143.912  41
  -1  -8  -6 3602.88 147.155  22
  -1  -8  -6 3792.40 131.689  38
  -1  -8  -6 3251.92 275.070  23
  -1  -8  -6 3731.63 130.826  39
  -1  -8  -6 3621.09 134.223   5
  -1  -8  -6 3722.38 131.640  21
  -1  -8  -6 3430.40 126.803  19
  -1  -8  -6 3631.76 124.309  18
  -1  -8  -7 3001.34 264.155  44
  -1  -8  -7 3256.95 116.387  18
  -1  -8  -7 3333.02 127.055  39
  -1  -8  -7 3186.33 118.290  34
  -1  -8  -7 3422.07 116.548  32
  -1  -8  -7 3381.33 124.356  38
  -1  -8  -7 3252.37 138.025  10
  -1  -8  -7 3398.37 134.198  48
  -1  -8  -7 3191.81 138.253  22
  -1  -8  -7 3462.22 127.616   5
  -1  -8  -7 3041.12 264.565  23
  -1  -8  -7 3537.92 135.863  43
  -1  -8  -7 3284.83 135.129  24
  -1  -8  -7 3335.53 121.786  21
  -1  -8  -7 3150.16 134.456  41
  -1  -8  -7 3123.46 122.782  19
  -1  -8  -8 7943.20 242.270  10
  -1  -8  -8 8525.86 217.986  32
  -1  -8  -8 8019.20 239.878  24
  -1  -8  -8 8023.76 248.990  22
  -1  -8  -8 7887.90 241.619  41
  -1  -8  -8 8277.25 228.253  38
  -1  -8  -8 8057.31 225.550   5
  -1  -8  -8 7849.96 434.626  44
  -1  -8  -8 8060.97 219.543  21
  -1  -8  -8 8342.18 236.900  43
  -1  -8  -8 7970.73 214.531  18
  -1  -8  -8 8221.02 233.449  39
  -1  -8  -8 8222.01 235.499  48
  -1  -8  -8 7643.33 432.961  23
  -1  -8  -9 1762.58 198.402  44
  -1  -8  -9 1690.88 99.3471  22
  -1  -8  -9 1788.26 90.5284  38
  -1  -8  -9 1815.58 92.8660  48
  -1  -8  -9 1812.94 99.3256  41
  -1  -8  -9 1834.32 83.2012  21
  -1  -8  -9 1901.10 95.9403  24
  -1  -8  -9 1872.03 201.624  23
  -1  -8  -9 1893.43 95.0051  43
  -1  -8  -9 1733.77 84.9332   5
  -1  -8 -10 6042.40 185.561  38
  -1  -8 -10 5659.12 172.598   5
  -1  -8 -10 5818.95 169.003  21
  -1  -8 -10 6593.49 208.244  41
  -1  -8 -10 5217.79 342.699  23
  -1  -8 -10 5612.29 182.720  24
  -1  -8 -10 6095.46 206.055  22
  -1  -8 -11 1449.10 88.1382  41
  -1  -8 -11 1252.37 84.3753  22
  -1  -8 -11 1261.72 76.0259  38
  -1  -8 -12 521.843 55.4613  41
  -1  -8 -12 456.203 51.7404  22
   1   8  12 359.467 88.1488  45
  -1  -8 -12 444.552 49.6714  38
  -1  -8 -13 339.083 45.7525  38
   1   8  13 273.438 72.6472  45
  -1  -8 -13 267.475 39.4035  22
  -1  -8 -13 272.943 40.7872  41
  -1  -8 -14 537.284 49.6102  41
  -1  -8 -14 506.118 50.6188  38
  -1  -8 -15 10949.5 273.684  38
  -1  -8 -15 10654.1 271.202  41
  -1  -8 -16 4473.12 137.469  32
  -1  -8 -16 4379.12 138.729  38
  -1  -8 -17 12711.8 292.435  25
  -1  -8 -17 13094.6 294.618  32
  -1  -8 -17 12694.7 294.007  38
  -1  -8 -18 1677.53 57.2320  26
  -1  -8 -18 1811.73 66.9634  25
  -1  -8 -18 1749.36 65.5979  38
  -1  -8 -18 1732.24 66.5293  32
  -1  -9  11 1866.14 67.1891  30
  -1  -9  11 1881.12 70.6520  39
  -1  -9  11 1708.78 64.0134  34
  -1  -9  11 1650.09 69.8314  20
  -1  -9  10 2060.03 80.8526  39
  -1  -9  10 1858.00 73.6279  34
  -1  -9  10 2065.71 77.0349  30
  -1  -9  10 1854.50 80.5040  20
  -1  -9   9 5675.38 151.088  29
  -1  -9   9 5729.11 162.493  34
  -1  -9   9 6060.11 154.051  18
  -1  -9   9 6034.12 169.089  39
  -1  -9   9 6118.09 164.768  30
  -1  -9   9 6195.45 174.551  20
  -1  -9   9 5901.89 165.437  12
  -1  -9   8 22.2655 14.0902  29
  -1  -9   8 40.8850 23.9793  34
  -1  -9   8-9.21468 24.8639  39
  -1  -9   8 27.8765 21.6763  30
  -1  -9   8 12.2125 17.7985  12
  -1  -9   8-20.0693 17.2668  18
  -1  -9   8-5.82619 25.7539  20
  -1  -9   7 19308.3 420.342  29
  -1  -9   7 20663.6 447.236  39
  -1  -9   7 20717.1 442.371  18
  -1  -9   7 19857.2 449.465  12
  -1  -9   7 19648.1 433.796  30
  -1  -9   7 19883.8 441.972  34
  -1  -9   7 19283.3 450.071  20
  -1  -9   6 1461.53 70.9971  30
  -1  -9   6 1451.59 81.9821  20
  -1  -9   6 1555.44 79.1647  39
  -1  -9   6 1435.65 80.0054  12
  -1  -9   6 1508.86 80.2515  17
  -1  -9   6 1380.78 73.8367  34
  -1  -9   6 1464.88 76.5694  18
  -1  -9   5 5422.99 159.026  30
  -1  -9   5 5538.55 162.973  21
  -1  -9   5 5449.83 172.178  17
  -1  -9   5 5605.87 177.255  20
  -1  -9   5 5686.19 172.628  39
  -1  -9   5 5599.01 179.780  12
  -1  -9   5 5348.37 175.623  24
  -1  -9   5 5493.88 169.003  34
  -1  -9   5 5364.23 170.186  18
  -1  -9   4 2532.80 248.933  23
  -1  -9   4 2737.54 115.334  20
  -1  -9   4 2842.06 111.519  39
  -1  -9   4 2733.00 119.209  24
  -1  -9   4 2666.77 99.1479  30
  -1  -9   4 2698.15 109.076  34
  -1  -9   4 2712.98 111.382  17
  -1  -9   4 2845.70 114.499  18
  -1  -9   4 2825.83 119.977  12
  -1  -9   4 2785.30 108.674  21
  -1  -9   3 31241.0 680.770  18
  -1  -9   3 32265.5 678.337  21
  -1  -9   3 32144.1 674.064  39
  -1  -9   3 29825.6 1016.76  23
  -1  -9   3 32472.8 700.672  24
  -1  -9   3 31482.7 654.068  30
  -1  -9   3 31754.1 692.055  12
  -1  -9   3 32627.2 675.900  17
  -1  -9   3 32884.2 689.404   5
  -1  -9   3 31796.9 681.850  20
  -1  -9   3 30975.8 672.827  34
  -1  -9   2 2557.82 113.835   5
  -1  -9   2 2159.05 112.413  48
  -1  -9   2 2021.37 225.455  23
  -1  -9   2 2568.81 108.073  21
  -1  -9   2 2302.47 100.589  34
  -1  -9   2 2321.46 98.2791  17
  -1  -9   2 2207.33 100.752  22
  -1  -9   2 2205.46 96.6130  39
  -1  -9   2 2094.79 108.511  24
  -1  -9   2 2269.30 101.021  20
  -1  -9   2 2260.54 114.068  43
  -1  -9   2 2119.73 239.967  44
  -1  -9   2 2230.20 106.521  12
  -1  -9   2 2339.73 106.466  18
  -1  -9   1 297.552 33.5308  38
  -1  -9   1 275.728 44.0642  48
  -1  -9   1 244.869 36.1584  20
  -1  -9   1 263.625 35.5656  39
  -1  -9   1 313.059 45.7382  24
  -1  -9   1 293.680 44.4198  12
  -1  -9   1 292.261 38.1485  41
  -1  -9   1 271.355 39.6821  18
  -1  -9   1 247.028 39.7493   5
  -1  -9   1 347.647 117.832  44
  -1  -9   1 217.453 34.4774  34
  -1  -9   1 246.384 35.1604  17
  -1  -9   1 247.303 90.6703  23
  -1  -9   1 309.583 41.8430  21
  -1  -9   1 331.890 48.6419  43
  -1  -9   1 332.719 49.1022  10
  -1  -9   1 257.013 37.1360  22
  -1  -9   0 1867.26 103.854  24
  -1  -9   0 1814.35 96.7402  22
  -1  -9   0 1742.00 102.046  43
  -1  -9   0 2007.24 90.9532  20
  -1  -9   0 1825.09 84.9978  38
  -1  -9   0 1795.99 103.927  10
  -1  -9   0 1767.85 214.290  23
  -1  -9   0 1819.74 81.9288  17
  -1  -9   0 1958.99 95.0049  21
  -1  -9   0 1812.99 103.279  48
  -1  -9   0 1894.95 87.2593  34
  -1  -9   0 2002.68 88.3615  39
  -1  -9   0 1872.62 92.1161  18
  -1  -9   0 1790.99 95.7475   5
  -1  -9   0 1793.07 222.898  44
  -1  -9   0 1874.92 96.8765  12
  -1  -9   0 1783.27 91.2749  41
  -1  -9  -1 28724.4 614.022  34
  -1  -9  -1 29113.7 617.906  38
  -1  -9  -1 28511.6 628.087  21
  -1  -9  -1 29347.0 643.980  22
  -1  -9  -1 28648.4 654.100  43
  -1  -9  -1 28290.5 636.687   5
  -1  -9  -1 28635.0 652.343  48
  -1  -9  -1 29432.3 659.851  10
  -1  -9  -1 29316.2 606.528  17
  -1  -9  -1 27148.6 992.948  44
  -1  -9  -1 28720.1 651.019  24
  -1  -9  -1 28806.7 634.128  41
  -1  -9  -1 29222.7 612.370  39
   1   9   1 29723.4 849.817  45
  -1  -9  -1 29130.7 637.417  12
  -1  -9  -1 27665.7 980.092  23
  -1  -9  -1 27964.6 619.569  18
  -1  -9  -2 3218.08 123.143  18
  -1  -9  -2 2909.42 136.854  48
  -1  -9  -2 3129.89 120.501  38
  -1  -9  -2 3165.88 127.642  21
  -1  -9  -2 3377.99 139.685  22
  -1  -9  -2 3407.31 141.972  24
  -1  -9  -2 3288.90 110.978  17
  -1  -9  -2 3148.89 117.310  34
  -1  -9  -2 3185.69 133.342  12
   1   9   2 3107.15 233.318  45
  -1  -9  -2 3389.11 118.589  39
  -1  -9  -2 2985.97 286.635  44
  -1  -9  -2 3120.27 285.531  23
  -1  -9  -2 3384.44 132.813  41
  -1  -9  -2 3184.88 119.083  19
  -1  -9  -2 2776.16 136.281  43
  -1  -9  -2 3455.81 137.074   5
  -1  -9  -2 3303.00 145.072  10
  -1  -9  -3 3492.09 151.129  10
  -1  -9  -3 3494.01 127.201  19
   1   9   3 3077.91 239.289  45
  -1  -9  -3 3726.54 117.762  17
  -1  -9  -3 3645.41 116.834  32
  -1  -9  -3 3396.09 148.509  48
  -1  -9  -3 3733.55 132.345  18
  -1  -9  -3 3726.58 143.999  41
  -1  -9  -3 3873.75 146.098   5
  -1  -9  -3 3517.80 145.928  22
  -1  -9  -3 3557.72 143.225  12
  -1  -9  -3 3644.25 137.628  21
  -1  -9  -3 3371.95 148.210  43
  -1  -9  -3 3696.18 318.765  44
  -1  -9  -3 3885.29 130.893  34
  -1  -9  -3 3533.13 148.075  24
  -1  -9  -3 3592.53 308.528  23
  -1  -9  -3 3613.90 126.548  39
  -1  -9  -3 3795.69 132.694  38
  -1  -9  -4 5698.71 202.900  10
  -1  -9  -4 5553.03 196.915  24
  -1  -9  -4 5790.38 184.332  21
  -1  -9  -4 6198.76 204.587  43
  -1  -9  -4 5690.60 193.065  41
  -1  -9  -4 5293.38 375.892  23
  -1  -9  -4 6152.88 203.742  48
  -1  -9  -4 5940.59 201.622  22
  -1  -9  -4 6053.54 179.316  18
  -1  -9  -4 6153.74 182.873  38
   1   9   4 5288.12 329.068  45
  -1  -9  -4 5882.01 164.699  32
  -1  -9  -4 5942.61 176.264  34
  -1  -9  -4 5839.76 190.456   5
  -1  -9  -4 5641.63 172.523  39
  -1  -9  -4 5740.97 398.401  44
  -1  -9  -4 5872.80 178.122  19
  -1  -9  -5 11214.5 309.910  43
  -1  -9  -5 11162.6 283.626  39
  -1  -9  -5 11338.6 311.875  24
  -1  -9  -5 10943.6 280.918  18
  -1  -9  -5 11021.5 287.238  38
  -1  -9  -5 11371.8 272.053  32
  -1  -9  -5 11687.4 312.044  48
  -1  -9  -5 11318.4 313.903  22
  -1  -9  -5 10278.0 545.011  23
  -1  -9  -5 11569.5 308.915  41
  -1  -9  -5 11098.8 565.801  44
  -1  -9  -5 11116.3 315.107  10
  -1  -9  -5 11154.6 291.084  21
  -1  -9  -5 10795.2 283.945  19
  -1  -9  -5 11392.0 299.145   5
  -1  -9  -5 11220.5 280.806  34
  -1  -9  -6 187.721 35.7954  34
  -1  -9  -6 218.850 44.9805  22
  -1  -9  -6 179.029 33.2293  38
  -1  -9  -6 238.708 38.3572  21
  -1  -9  -6 172.503 87.0983  23
  -1  -9  -6 127.575 35.3209  10
  -1  -9  -6 88.4170 74.2181  44
  -1  -9  -6 180.100 31.8043  18
  -1  -9  -6 199.743 27.4835  32
  -1  -9  -6 175.177 40.0009  48
  -1  -9  -6 223.833 42.0238  43
  -1  -9  -6 173.493 32.1614  39
  -1  -9  -6 194.776 38.2326   5
  -1  -9  -6 153.094 36.2748  41
  -1  -9  -6 146.810 34.4775  24
  -1  -9  -6 119.806 29.1499  19
  -1  -9  -7 144.566 39.4569  24
  -1  -9  -7 118.163 25.1662  32
  -1  -9  -7 52.9676 28.8906  19
  -1  -9  -7 123.958 30.1698  38
  -1  -9  -7 131.492 42.6940  22
  -1  -9  -7 112.108 30.6274  34
  -1  -9  -7 134.627 34.5014  48
  -1  -9  -7 87.8824 33.1558  10
  -1  -9  -7 129.225 32.4714  39
  -1  -9  -7 118.490 83.4325  23
  -1  -9  -7 75.6983 71.8530  44
  -1  -9  -7 120.874 34.5763  43
  -1  -9  -7 96.9527 30.5381   5
  -1  -9  -7 127.523 31.1281  21
  -1  -9  -7 177.151 32.2625  18
  -1  -9  -7 182.286 43.6169  41
  -1  -9  -8 5833.37 196.237  24
  -1  -9  -8 6120.73 197.644  43
  -1  -9  -8 6287.52 175.846  32
  -1  -9  -8 5798.38 183.161   5
  -1  -9  -8 5673.22 204.650  22
  -1  -9  -8 5575.70 385.427  23
  -1  -9  -8 5995.51 175.581  18
  -1  -9  -8 5855.57 200.129  41
  -1  -9  -8 6095.32 187.500  38
  -1  -9  -8 5842.69 177.987  21
  -1  -9  -8 5583.32 377.579  44
  -1  -9  -8 5811.53 193.605  48
  -1  -9  -9 689.866 68.0671  22
  -1  -9  -9 564.025 58.2550  41
  -1  -9  -9 668.107 51.3320  32
  -1  -9  -9 696.339 51.8126  21
  -1  -9  -9 690.180 58.7056  24
  -1  -9  -9 562.500 40.7041  25
  -1  -9  -9 653.442 52.4073   5
  -1  -9  -9 705.119 56.7400  38
   1   9   9 706.474 131.126  45
  -1  -9  -9 595.592 117.745  23
  -1  -9 -10 1438.67 72.7873  21
   1   9  10 1467.87 179.871  45
  -1  -9 -10 1527.49 95.2856  22
  -1  -9 -10 1489.25 82.9788  38
  -1  -9 -10 1525.33 84.2240  24
  -1  -9 -10 1492.55 75.9869  32
  -1  -9 -10 1445.14 91.0922  41
  -1  -9 -10 1473.38 68.9645  25
  -1  -9 -11 7066.10 207.637  38
  -1  -9 -11 7130.18 222.229  41
  -1  -9 -11 6700.59 185.715  25
   1   9  11 7121.35 396.510  45
  -1  -9 -11 6918.32 196.311  32
  -1  -9 -11 7151.16 225.318  22
  -1  -9 -12 1944.63 101.369  22
  -1  -9 -12 1972.59 100.941  41
  -1  -9 -12 1997.89 89.5769  32
  -1  -9 -12 2005.44 96.8103  38
  -1  -9 -12 2056.59 83.4913  25
  -1  -9 -13 145.647 25.8456  25
  -1  -9 -13 150.227 33.9469  38
  -1  -9 -13 173.440 32.9202  41
  -1  -9 -13 93.4602 25.8953  22
  -1  -9 -13 152.329 31.0801  32
  -1  -9 -14 49.8911 27.1542  38
  -1  -9 -14 55.2342 20.9492  25
  -1  -9 -14 47.7700 21.5790  41
  -1  -9 -15 22342.0 495.040  41
  -1  -9 -15 23786.3 494.912  32
  -1  -9 -15 23618.5 487.315  25
  -1  -9 -15 23076.0 498.947  38
  -1  -9 -16 1339.53 63.0199  38
  -1  -9 -16 1283.64 57.0940  25
  -1  -9 -16 1318.54 61.3068  32
  -1  -9 -17 121.121 17.7700  25
  -1  -9 -17 100.635 18.9541  32
  -1  -9 -17 95.6452 18.5049  38
  -1 -10   9 246.394 22.5624  30
  -1 -10   9 189.280 23.3860  39
  -1 -10   9 206.084 22.5386  34
  -1 -10   9 189.752 26.0093  20
  -1 -10   8 928.673 52.5617  34
  -1 -10   8 978.424 46.4598  30
  -1 -10   8 992.703 55.4927  20
  -1 -10   8 1061.92 53.3182  39
  -1 -10   8 976.149 46.7842  18
  -1 -10   7 714.270 48.3289  12
  -1 -10   7 674.257 43.6504  18
  -1 -10   7 811.509 54.2997  20
  -1 -10   7 712.564 48.2329  34
  -1 -10   7 699.936 41.0197  30
  -1 -10   7 804.831 49.6973  39
  -1 -10   6 15602.6 370.685  12
  -1 -10   6 16094.4 362.239  18
  -1 -10   6 15965.0 362.142  34
  -1 -10   6 15465.0 345.845  30
  -1 -10   6 16329.5 371.625  20
  -1 -10   5 6158.71 176.800  34
  -1 -10   5 6326.00 180.723  17
  -1 -10   5 6506.14 178.991  39
  -1 -10   5 6238.18 179.456  18
  -1 -10   5 6329.26 189.867  12
  -1 -10   5 5994.28 161.032  30
  -1 -10   5 6005.58 179.127  24
  -1 -10   5 6414.14 186.098  20
  -1 -10   4 829.699 54.2896  21
  -1 -10   4 824.953 59.2408  18
  -1 -10   4 849.398 58.1655  17
  -1 -10   4 842.253 55.3442  39
  -1 -10   4 703.194 42.6371  30
  -1 -10   4 786.829 60.8917  12
  -1 -10   4 858.505 63.2026  20
  -1 -10   4 805.933 56.3990  34
  -1 -10   4 723.042 57.6126  24
  -1 -10   3 1603.56 83.9628  18
  -1 -10   3 1632.22 89.5457  24
  -1 -10   3 1699.55 81.3176  17
  -1 -10   3 1718.75 82.0355  21
  -1 -10   3 1510.77 79.2496  34
  -1 -10   3 1629.75 88.7900  12
  -1 -10   3 1718.95 81.2365  39
  -1 -10   3 1635.80 85.0301  20
  -1 -10   2 2979.36 112.340  17
  -1 -10   2 2879.33 113.367  34
  -1 -10   2 2975.21 127.641  12
  -1 -10   2 3069.41 124.018   5
  -1 -10   2 3129.12 119.369  21
  -1 -10   2 3188.92 115.179  39
  -1 -10   2 2946.89 129.341  24
  -1 -10   2 3038.60 121.614  18
  -1 -10   1 3515.34 123.642  17
  -1 -10   1 3469.52 116.989  38
  -1 -10   1 3078.89 287.254  23
  -1 -10   1 3624.19 134.581  21
  -1 -10   1 3318.58 143.682  24
  -1 -10   1 3542.82 139.341  12
  -1 -10   1 3808.01 128.057  39
  -1 -10   1 3718.38 141.038   5
  -1 -10   1 3493.78 133.324  18
  -1 -10   1 3599.51 134.832  22
  -1 -10   1 3606.52 128.785  34
  -1 -10   1 3490.63 125.551  41
  -1 -10   0 13571.4 654.916  44
  -1 -10   0 13797.2 340.058  41
  -1 -10   0 13562.5 331.405  34
  -1 -10   0 13483.8 640.397  23
  -1 -10   0 13780.3 349.365  22
  -1 -10   0 13584.0 325.241  38
  -1 -10   0 13705.0 349.687   5
  -1 -10   0 13928.1 344.057  21
  -1 -10   0 13787.9 323.475  17
  -1 -10   0 14147.3 365.460  24
  -1 -10   0 13851.0 367.254  43
  -1 -10   0 14693.7 333.950  39
  -1 -10   0 13169.8 337.910  18
  -1 -10   0 13909.4 354.796  12
  -1 -10  -1 2741.14 114.697  18
  -1 -10  -1 2592.28 113.902  41
  -1 -10  -1 2847.51 103.039  17
  -1 -10  -1 2609.06 128.269  48
  -1 -10  -1 2804.17 108.515  39
  -1 -10  -1 2596.70 115.391  21
  -1 -10  -1 2784.78 130.730  24
  -1 -10  -1 2780.74 111.653  19
  -1 -10  -1 2797.52 125.193  12
  -1 -10  -1 2756.93 130.755  43
  -1 -10  -1 2843.71 285.607  44
  -1 -10  -1 2797.08 107.575  38
  -1 -10  -1 2726.35 270.835  23
  -1 -10  -1 2813.39 110.539  34
  -1 -10  -1 2650.04 120.068  22
  -1 -10  -1 2542.92 119.133   5
  -1 -10  -2 7763.57 217.695  34
  -1 -10  -2 8112.33 225.753  18
  -1 -10  -2 8501.66 253.516  24
  -1 -10  -2 7955.35 219.068  38
  -1 -10  -2 8021.39 218.440  39
  -1 -10  -2 7473.75 472.717  44
  -1 -10  -2 7838.11 221.402  19
  -1 -10  -2 7783.74 247.508  48
  -1 -10  -2 7698.38 468.276  23
  -1 -10  -2 8023.83 231.937  21
  -1 -10  -2 8044.53 242.606  22
  -1 -10  -2 7646.14 246.556  43
  -1 -10  -2 8141.26 239.214   5
  -1 -10  -2 7798.27 231.727  41
  -1 -10  -2 7861.49 205.336  17
  -1 -10  -3 196.682 42.6463  24
  -1 -10  -3 180.086 38.6736  21
  -1 -10  -3 228.020 39.7131  34
  -1 -10  -3 187.467 45.0886  43
  -1 -10  -3 234.284 41.0844  41
  -1 -10  -3 240.055 37.1108  19
   1  10   3 190.290 66.9892  45
  -1 -10  -3 209.447 27.5578  17
  -1 -10  -3 167.297 40.0726   5
  -1 -10  -3 216.206 92.5033  23
  -1 -10  -3 212.005 34.7827  39
  -1 -10  -3 121.611 95.9915  44
  -1 -10  -3 193.405 42.8759  48
  -1 -10  -3 191.851 39.3327  22
  -1 -10  -3 225.745 38.8660  18
  -1 -10  -3 213.275 34.4011  38
  -1 -10  -4 4642.93 172.143  48
  -1 -10  -4 4627.44 157.883  21
  -1 -10  -4 3824.66 329.950  44
  -1 -10  -4 4326.93 145.418  39
  -1 -10  -4 4214.52 129.449  32
  -1 -10  -4 4277.04 168.814  43
  -1 -10  -4 4326.91 159.982  41
  -1 -10  -4 4308.68 168.658  24
  -1 -10  -4 3866.49 329.511  23
  -1 -10  -4 4503.28 169.108  22
  -1 -10  -4 4104.05 157.996   5
  -1 -10  -4 4357.56 147.813  18
  -1 -10  -4 4489.37 148.075  34
  -1 -10  -4 4270.02 145.974  38
  -1 -10  -4 4251.76 147.905  19
   1  10   4 4022.15 281.817  45
   1  10   5 11895.7 529.561  45
  -1 -10  -5 12947.4 341.929  24
  -1 -10  -5 12305.5 339.975  22
  -1 -10  -5 12554.7 339.174  48
  -1 -10  -5 12964.7 624.347  44
  -1 -10  -5 12233.9 310.346  39
  -1 -10  -5 12836.6 333.957  41
  -1 -10  -5 12129.0 603.378  23
  -1 -10  -5 12801.3 341.068  43
  -1 -10  -5 12409.5 309.839  18
  -1 -10  -5 12609.7 316.189  19
  -1 -10  -5 12564.4 294.222  32
  -1 -10  -5 12938.3 312.637  34
  -1 -10  -5 12048.2 323.807   5
  -1 -10  -5 12558.4 319.942  21
  -1 -10  -5 12531.9 313.619  38
  -1 -10  -6 6104.00 195.086   5
  -1 -10  -6 6119.09 206.839  24
  -1 -10  -6 6182.11 183.265  18
  -1 -10  -6 6037.15 186.471  39
  -1 -10  -6 6097.95 190.475  19
  -1 -10  -6 6282.46 173.392  32
  -1 -10  -6 6269.41 212.306  22
  -1 -10  -6 6109.34 188.745  38
  -1 -10  -6 6270.22 186.934  34
  -1 -10  -6 6231.00 191.325  21
  -1 -10  -6 5629.46 393.717  23
  -1 -10  -6 6312.76 205.534  41
   1  10   6 6113.16 366.465  45
   1  10   7 426.408 106.151  45
  -1 -10  -7 671.407 56.3902  34
  -1 -10  -7 663.869 54.2647  21
  -1 -10  -7 677.528 47.9605  32
  -1 -10  -7 594.396 50.0086  18
  -1 -10  -7 644.280 56.6584  39
  -1 -10  -7 483.318 124.847  23
  -1 -10  -7 598.677 63.6881  22
  -1 -10  -7 643.160 61.3414  24
  -1 -10  -7 599.774 60.3068  41
  -1 -10  -7 636.023 54.7028   5
  -1 -10  -7 633.831 54.4705  38
  -1 -10  -8 10297.0 297.912  22
  -1 -10  -8 10692.3 260.242  32
  -1 -10  -8 10703.4 292.775  41
   1  10   8 10334.6 498.646  45
  -1 -10  -8 10910.5 291.418  24
  -1 -10  -8 10221.5 266.993  21
  -1 -10  -8 10239.7 273.031   5
  -1 -10  -8 9518.56 515.661  23
  -1 -10  -8 10557.1 276.844  38
  -1 -10  -9 569.712 61.0282  41
  -1 -10  -9 696.793 58.8847  24
  -1 -10  -9 690.984 49.3121  32
   1  10   9 464.557 102.212  45
  -1 -10  -9 643.705 56.2535  38
  -1 -10  -9 702.162 65.6913  22
  -1 -10  -9 618.715 47.8656  21
  -1 -10 -10 447.945 53.0241  22
  -1 -10 -10 364.256 36.2177  21
  -1 -10 -10 430.781 40.8618  32
  -1 -10 -10 404.337 45.9817  38
  -1 -10 -10 404.314 43.4530  24
  -1 -10 -10 471.255 57.2504  41
  -1 -10 -11 147.393 37.3107  41
  -1 -10 -11 87.5793 24.2408  32
  -1 -10 -11 90.0460 21.4526  24
  -1 -10 -11 116.276 34.2936  38
  -1 -10 -11 170.953 38.8066  22
  -1 -10 -12 13326.9 300.722  25
  -1 -10 -12 14001.9 330.013  38
  -1 -10 -12 13479.9 339.024  22
  -1 -10 -12 13732.1 339.032  41
  -1 -10 -12 14190.4 318.108  32
  -1 -10 -13 100.389 28.0654  41
  -1 -10 -13 119.305 25.1454  32
  -1 -10 -13 90.9874 17.0194  25
  -1 -10 -13 66.6911 23.8681  38
  -1 -10 -14 2995.30 107.753  41
  -1 -10 -14 3097.22 108.051  38
  -1 -10 -14 3222.63 102.532  32
  -1 -10 -14 3030.06 91.6768  25
  -1 -10 -15 3098.15 100.562  41
  -1 -10 -15 3380.10 107.372  38
  -1 -10 -15 3315.78 92.4218  25
  -1 -10 -15 3460.67 102.393  32
  -1 -11   7 400.239 28.7355  34
  -1 -11   7 412.856 28.5085  39
  -1 -11   7 370.288 25.1829  18
  -1 -11   6 8199.98 194.466  39
  -1 -11   6 8162.26 195.649  34
  -1 -11   6 7969.29 193.242  18
  -1 -11   5 18362.8 397.971  18
  -1 -11   5 18030.6 395.889  34
  -1 -11   5 19004.7 395.798  39
  -1 -11   4 4374.43 132.623  34
  -1 -11   4 4576.22 131.764  39
  -1 -11   4 4478.58 135.353  18
  -1 -11   4 4223.38 133.628  24
  -1 -11   3 9164.49 231.694  34
  -1 -11   3 9019.72 241.469  24
  -1 -11   3 8846.74 233.898  18
  -1 -11   3 9294.07 229.357  39
  -1 -11   2 611.799 47.8005  21
  -1 -11   2 609.594 49.0665  34
  -1 -11   2 656.598 44.9453  17
  -1 -11   2 620.885 54.6412  24
  -1 -11   2 669.290 53.6935  18
  -1 -11   2 671.945 52.4023  19
  -1 -11   2 674.220 47.4181  39
  -1 -11   1 72.1543 29.9894  24
  -1 -11   1 94.0731 30.3863  34
  -1 -11   1 80.9414 26.1803  39
  -1 -11   1 95.0035 24.8614  17
  -1 -11   1 122.795 34.8819  19
  -1 -11   1 115.987 30.7664  21
  -1 -11   1 121.404 33.1615  18
  -1 -11   0 5025.43 147.220  17
  -1 -11   0 5324.98 165.809  21
  -1 -11   0 5046.04 143.621  38
  -1 -11   0 5446.34 158.570  39
  -1 -11   0 5263.88 161.235  19
  -1 -11   0 5229.76 164.681  22
  -1 -11   0 5116.22 153.319  41
  -1 -11   0 5458.92 180.386  24
  -1 -11   0 5340.79 165.164  18
  -1 -11   0 5159.59 157.540  34
  -1 -11  -1 11725.2 292.346  18
  -1 -11  -1 11633.0 285.197  34
  -1 -11  -1 11793.5 314.057  24
  -1 -11  -1 11691.0 272.370  17
  -1 -11  -1 11579.4 299.120  22
  -1 -11  -1 11473.4 275.888  38
  -1 -11  -1 11948.0 286.000  39
  -1 -11  -1 12385.7 292.897  19
  -1 -11  -1 11053.1 299.783   5
  -1 -11  -1 11456.8 294.543  21
  -1 -11  -1 11562.8 289.239  41
  -1 -11  -2-8.82529 16.4643  17
  -1 -11  -2 6.40690 28.3412  21
  -1 -11  -2 42.6460 30.7942  34
  -1 -11  -2 25.6578 30.1200  19
  -1 -11  -2 11.6101 24.8523  22
  -1 -11  -2 0.81668 25.5262  39
  -1 -11  -2-22.3063 32.2462   5
  -1 -11  -2-15.0549 31.8838  24
  -1 -11  -2 8.92512 15.9563  38
  -1 -11  -2-41.8736 23.6034  41
  -1 -11  -2 21.1176 28.7886  18
  -1 -11  -3 247.101 38.9268  41
  -1 -11  -3 245.653 36.3627  34
  -1 -11  -3 218.868 41.1387  21
  -1 -11  -3 233.701 34.3750  39
  -1 -11  -3 323.681 52.4059  24
  -1 -11  -3 243.783 41.7634  22
  -1 -11  -3 182.829 37.3679  19
  -1 -11  -3 139.424 37.2658   5
  -1 -11  -3 280.127 41.1645  18
  -1 -11  -3 210.833 30.8420  38
  -1 -11  -4 55.5431 29.5931  34
  -1 -11  -4 84.5475 32.0389  22
  -1 -11  -4 71.1529 25.0416  38
  -1 -11  -4 49.8267 30.8013  19
  -1 -11  -4 72.6281 27.2248  39
  -1 -11  -4 55.7206 33.4058  24
  -1 -11  -4 84.9458 31.6551  41
  -1 -11  -4 55.0571 33.1694   5
  -1 -11  -4 80.9970 35.7154  21
  -1 -11  -4 59.7034 27.8956  18
  -1 -11  -5 23934.4 544.091  41
  -1 -11  -5 24462.2 528.155  39
  -1 -11  -5 23981.4 526.126  34
  -1 -11  -5 24265.3 554.034  24
  -1 -11  -5 24469.8 535.553  21
  -1 -11  -5 24654.5 526.504  38
  -1 -11  -5 23489.9 530.937  19
  -1 -11  -5 25028.9 557.064  22
  -1 -11  -5 23560.3 523.493  18
  -1 -11  -5 24309.7 542.605   5
  -1 -11  -6 3319.32 135.348  24
  -1 -11  -6 3254.78 104.032  32
  -1 -11  -6 3267.62 122.872  21
  -1 -11  -6 3229.69 119.821  39
  -1 -11  -6 3203.30 117.011  18
  -1 -11  -6 3245.49 120.236  34
  -1 -11  -6 3400.05 139.139  22
  -1 -11  -6 3317.74 128.248   5
  -1 -11  -6 3232.27 131.285  41
  -1 -11  -6 3489.39 122.829  38
  -1 -11  -7 73.4445 29.8479  24
  -1 -11  -7 100.278 29.3590  21
  -1 -11  -7 42.3395 33.5607  22
  -1 -11  -7 103.233 35.1383  41
  -1 -11  -7 100.303 20.3034  32
  -1 -11  -7 163.081 31.5988  38
  -1 -11  -8 4441.85 128.520  32
  -1 -11  -8 4326.80 160.611  22
  -1 -11  -8 4337.68 154.801  41
  -1 -11  -8 4333.25 143.652  38
  -1 -11  -8 4238.38 138.426  21
  -1 -11  -8 4425.40 152.657  24
  -1 -11  -9 8175.37 233.625  41
  -1 -11  -9 8168.86 239.971  22
  -1 -11  -9 8628.89 225.811  38
  -1 -11  -9 8284.31 227.576  24
  -1 -11  -9 8451.25 207.136  32
  -1 -11 -10 3018.20 98.3029  32
  -1 -11 -10 3009.50 110.264  38
  -1 -11 -10 2837.69 105.675  24
  -1 -11 -10 2936.38 119.777  22
  -1 -11 -10 2862.08 116.191  41
  -1 -11 -11 625.972 51.2770  22
  -1 -11 -11 550.458 37.0506  24
  -1 -11 -11 618.163 46.9459  38
  -1 -11 -11 593.585 39.1773  32
  -1 -11 -11 606.769 50.3586  41
  -1 -11 -12 3073.66 96.7827  32
  -1 -11 -12 3053.44 111.598  41
  -1 -11 -12 3319.70 109.816  38
  -1 -11 -13 4722.54 141.751  41
  -1 -11 -13 4924.59 130.169  32
  -1 -11 -14 1160.02 52.8844  41
  -1 -11 -14 1150.36 47.2283  32
  -1 -11 -14 1160.55 53.3905  38
  -1 -12   4 508.605 30.6684  39
  -1 -12   4 503.018 31.9524  34
  -1 -12   4 519.060 32.8931  18
  -1 -12   4 598.541 36.3552  19
  -1 -12   3 643.122 37.0187  39
  -1 -12   3 667.056 39.4433  34
  -1 -12   3 712.713 41.9334  19
  -1 -12   3 609.844 38.6404  18
  -1 -12   2 2872.41 98.7654  24
  -1 -12   2 2771.70 95.0944  18
  -1 -12   2 2942.08 97.3719  19
  -1 -12   2 2781.78 92.9922  34
  -1 -12   2 2991.55 92.8766  39
  -1 -12   1 609.309 43.3135  19
  -1 -12   1 557.342 44.2161  24
  -1 -12   1 524.548 39.2429  34
  -1 -12   1 563.252 41.5530  18
  -1 -12   1 538.273 37.7081  39
  -1 -12   0 8624.94 221.387  18
  -1 -12   0 9103.07 235.289  24
  -1 -12   0 9047.71 217.224  39
  -1 -12   0 8820.93 218.232  34
  -1 -12   0 9115.43 223.193  19
  -1 -12  -1 2011.10 80.2035  34
  -1 -12  -1 2160.90 94.8769  24
  -1 -12  -1 2088.95 79.9683  39
  -1 -12  -1 2079.78 84.4260  19
  -1 -12  -1 1886.40 83.5337  21
  -1 -12  -1 2163.90 86.9644  18
  -1 -12  -2 402.891 38.7791  34
  -1 -12  -2 359.109 32.9304  41
  -1 -12  -2 362.093 35.5249  22
  -1 -12  -2 398.587 40.6911  18
  -1 -12  -2 385.367 38.5258  19
  -1 -12  -2 472.692 47.0768  24
  -1 -12  -2 358.605 38.4048  21
  -1 -12  -2 350.716 33.3415  39
  -1 -12  -3 162.577 26.1886  39
  -1 -12  -3 145.907 33.0854  24
  -1 -12  -3 115.900 27.9802  21
  -1 -12  -3 161.902 29.4414  22
  -1 -12  -3 112.861 23.7381  41
  -1 -12  -3 133.958 28.0036  18
  -1 -12  -3 112.108 19.3101  38
  -1 -12  -3 122.293 28.3195  34
  -1 -12  -3 136.140 29.4361  19
  -1 -12  -4 2951.88 107.992  41
  -1 -12  -4 2829.42 115.553  24
  -1 -12  -4 3094.91 104.578  39
  -1 -12  -4 3051.62 99.6118  38
  -1 -12  -4 2968.64 114.430  22
  -1 -12  -4 3218.35 112.726  21
  -1 -12  -4 2954.32 109.420  19
  -1 -12  -4 2990.31 105.400  18
  -1 -12  -4 3033.74 106.239  34
  -1 -12  -5 742.988 51.8981  21
  -1 -12  -5 741.207 55.3016  22
  -1 -12  -5 734.792 55.0606  24
  -1 -12  -5 733.340 45.5284  38
  -1 -12  -5 784.055 53.4389  41
  -1 -12  -6 3182.92 105.065  38
  -1 -12  -6 3016.01 116.663  24
  -1 -12  -6 3120.21 113.991  41
  -1 -12  -6 3123.10 109.278  21
  -1 -12  -6 3073.00 118.020  22
  -1 -12  -7 2861.54 107.151  41
  -1 -12  -7 2674.12 105.961  24
  -1 -12  -7 2801.34 110.957  22
  -1 -12  -7 2821.01 97.7521  38
  -1 -12  -8 4049.47 122.121  38
  -1 -12  -8 3955.98 130.772  41
  -1 -12  -8 4070.11 136.361  22
  -1 -12  -8 3677.32 124.973  24
  -1 -12  -9 2443.50 89.4571  24
  -1 -12  -9 2490.64 95.8009  41
  -1 -12  -9 2395.68 97.4410  22
  -1 -12  -9 2555.95 89.0223  38
  -1 -12 -10 3849.99 123.334  41
  -1 -12 -10 3620.35 109.166  24
  -1 -12 -11 2189.82 76.5243  38
  -1 -12 -11 2037.54 79.5642  41
  -1 -13  -2 10.3794 13.9495  24
  -1 -13  -3 4286.05 126.554  24
  -1 -13  -4 179.976 24.0196  24
  -1 -13  -5 2988.56 91.6277  41
  -1 -13  -5 3000.91 99.7352  24
   2 -12  -9 132.776 21.4833  38
   2 -12  -9 104.172 16.8820  32
   2 -12  -8 947.215 44.7423  32
   2 -12  -8 890.056 50.1673  38
   2 -12  -8 803.900 41.7464  21
   2 -12  -7 7708.23 192.114  21
   2 -12  -7 8112.55 201.948  38
   2 -12  -7 7925.74 197.581   5
   2 -12  -7 7838.35 188.294  32
   2 -12  -6 6964.06 182.477  38
   2 -12  -6 6763.11 167.102  32
   2 -12  -6 6593.06 175.046  21
   2 -12  -6 6531.84 178.798   5
   2 -12  -5 3258.33 110.197  21
   2 -12  -5 3356.92 115.568   5
   2 -12  -5 3265.80 97.5105  18
   2 -12  -5 3406.03 101.153  32
   2 -12  -5 3558.86 115.616  38
   2 -12  -4 1821.67 69.2627  18
   2 -12  -4 1885.11 83.3677   5
   2 -12  -4 1814.16 79.2784  38
   2 -12  -4 1876.94 80.2678  21
   2 -12  -4 1844.90 67.9326  32
   2 -12  -3 1075.18 59.3898  21
   2 -12  -3 1014.69 56.7143  38
   2 -12  -3 952.293 60.2379   5
   2 -12  -3 948.852 50.0153  18
   2 -12  -3 971.699 50.5752  34
   2 -12  -3 1041.39 47.1453  32
   2 -12  -3 962.170 44.4222  17
   2 -12  -2 3757.35 126.441   5
   2 -12  -2 3802.60 123.489  21
   2 -12  -2 3511.97 105.222  17
   2 -12  -2 3947.42 121.506  38
   2 -12  -2 3692.72 113.599  18
   2 -12  -2 3794.41 112.425  34
   2 -12  -1 620.719 42.0653  19
   2 -12  -1 557.117 44.8431  21
   2 -12  -1 553.922 35.6382  17
   2 -12  -1 513.007 38.3660  38
   2 -12  -1 584.209 38.0181  34
   2 -12  -1 543.907 45.9946   5
   2 -12  -1 498.722 38.2486  18
   2 -12   0 3773.20 125.204   5
   2 -12   0 3873.57 116.142  38
   2 -12   0 3719.13 110.628  17
   2 -12   0 3709.02 120.963  21
   2 -12   0 3891.29 113.869  34
   2 -12   0 3980.59 117.702  19
   2 -12   0 3985.19 119.179  18
   2 -12   1 1742.34 73.3393  21
   2 -12   1 1891.68 70.5900  34
   2 -12   1 1803.06 73.1306  18
   2 -12   1 1817.84 70.2637  19
   2 -12   1 1833.55 68.8207  17
   2 -12   1 1691.00 74.8330   5
   2 -12   2 518.007 38.1990   5
   2 -12   2 568.866 36.6953  19
   2 -12   2 603.900 40.2224  18
   2 -12   2 541.643 36.4096  17
   2 -12   2 558.016 38.0057  21
   2 -12   2 587.916 37.7114  34
   2 -12   3 3670.40 104.803  17
   2 -12   3 3683.65 108.818  18
   2 -12   3 3289.13 100.024  21
   2 -12   3 3660.11 103.766  34
   2 -12   3 3545.36 101.289  19
   2 -12   4 3093.61 89.7000  34
   2 -12   4 2788.52 90.5141  18
   2 -12   4 2959.36 86.0889  19
   2 -12   4 3079.38 90.6122  17
   2 -11 -12 1323.33 56.3964  32
   2 -11 -12 1305.10 58.5679  38
   2 -11 -11 6191.85 162.010  32
   2 -11 -11 6204.88 172.567  41
   2 -11 -11 6270.30 168.653  38
   2 -11 -10 51.7254 25.0909  38
   2 -11 -10 24.8021 21.2353  41
   2 -11 -10 33.9174 20.6902  32
   2 -11  -9 102.690 28.2164  38
   2 -11  -9 62.6028 16.9925  21
   2 -11  -9 128.251 32.4844  41
   2 -11  -9 113.196 27.0239  32
   2 -11  -9 111.123 23.0829   5
   2 -11  -8 1129.68 60.5963  32
   2 -11  -8 1055.04 64.4529  38
   2 -11  -8 1020.64 58.2353   5
   2 -11  -8 1064.70 71.0038  41
   2 -11  -8 1076.51 57.6088  21
   2 -11  -7 2667.17 100.433  32
   2 -11  -7 2656.01 101.842  21
   2 -11  -7 2724.82 118.633  41
   2 -11  -7 2842.05 112.012  38
   2 -11  -7 2799.15 108.082   5
   2 -11  -6 3.62561 27.6005  24
   2 -11  -6 78.1710 24.8686  32
   2 -11  -6 50.3762 33.0125  41
   2 -11  -6 67.0538 28.4693   5
   2 -11  -6 84.2343 33.3605  38
   2 -11  -6 104.031 31.6632  21
   2 -11  -6 85.5838 19.8507  18
   2 -11  -5 542.692 50.6548  21
   2 -11  -5 671.336 47.3666  32
   2 -11  -5 639.556 55.1391  38
   2 -11  -5 670.210 46.4416  34
   2 -11  -5 657.771 61.5916  41
   2 -11  -5 565.385 57.2721  24
   2 -11  -5 786.695 57.7690  42
   2 -11  -5 602.525 54.6182   5
   2 -11  -5 648.735 44.1844  18
   2 -11  -4 5730.46 185.134   5
   2 -11  -4 5677.08 178.704  21
   2 -11  -4 5827.02 163.859  18
   2 -11  -4 5887.05 166.090  32
   2 -11  -4 5668.28 178.352  42
   2 -11  -4 5820.91 181.668  38
   2 -11  -4 5682.85 190.839  41
   2 -11  -4 5659.96 161.818  34
   2 -11  -4 5630.34 192.707  24
   2 -11  -3 6867.84 192.960  18
   2 -11  -3 7397.16 193.120  32
   2 -11  -3 7247.87 228.412  24
   2 -11  -3 7294.45 217.009   5
   2 -11  -3 7395.91 212.225  21
   2 -11  -3 6896.17 189.984  34
   2 -11  -3 6802.22 206.632  42
   2 -11  -3 7548.57 204.855  19
   2 -11  -3 7231.83 220.155  41
   2 -11  -3 7418.58 211.619  38
   2 -11  -2 322.937 35.6459  34
   2 -11  -2 320.790 44.4305  21
   2 -11  -2 314.148 37.5166  19
   2 -11  -2 332.665 38.0529  18
   2 -11  -2 343.573 33.7412  32
   2 -11  -2 296.303 40.8476  42
   2 -11  -2 328.157 42.0279  38
   2 -11  -2 347.267 51.3316  24
   2 -11  -2 376.014 47.6423  41
   2 -11  -2 329.049 45.6174   5
   2 -11  -1 45.7285 37.2684  24
   2 -11  -1 51.5995 25.6806  19
   2 -11  -1 84.4548 31.8956  21
   2 -11  -1 79.7347 29.2891  38
   2 -11  -1 86.1292 27.8404  34
   2 -11  -1 56.3103 27.1624  18
   2 -11  -1 67.8187 31.5189   5
   2 -11  -1 59.7456 19.1697  32
   2 -11  -1 49.1433 28.1113  42
   2 -11   0 538.440 44.6115  34
   2 -11   0 473.743 35.9650  32
   2 -11   0 491.109 44.9607  38
   2 -11   0 427.872 52.1543  24
   2 -11   0 546.279 45.5092  19
   2 -11   0 460.723 52.8793   5
   2 -11   0 495.152 43.1914  17
   2 -11   0 452.276 44.7589  18
   2 -11   0 407.186 46.4295  21
   2 -11   0 492.410 47.9048  42
   2 -11   1 2820.70 122.954  24
   2 -11   1 2993.52 105.491  34
   2 -11   1 2831.26 110.430  18
   2 -11   1 2881.92 108.930  38
   2 -11   1 2769.69 115.994   5
   2 -11   1 2849.63 104.966  19
   2 -11   1 2874.81 104.937  17
   2 -11   1 2722.28 111.112  21
   2 -11   1 2883.66 93.4885  32
   2 -11   2 647.308 49.1001  17
   2 -11   2 613.118 51.8017  18
   2 -11   2 619.887 54.4174  24
   2 -11   2 611.209 45.5933  19
   2 -11   2 596.490 45.7994  38
   2 -11   2 579.275 46.3236  34
   2 -11   2 612.468 51.0172   5
   2 -11   2 588.234 48.2183  21
   2 -11   3 2301.42 97.1036  18
   2 -11   3 2454.59 95.2916  17
   2 -11   3 2282.33 92.8648  21
   2 -11   3 2467.42 98.2436   5
   2 -11   3 2327.92 88.8812  19
   2 -11   3 2510.60 93.2638  34
   2 -11   4 2399.50 89.5225  21
   2 -11   4 2518.44 92.9795  34
   2 -11   4 2525.57 89.6582  19
   2 -11   4 2459.95 97.2712  18
   2 -11   4 2553.93 94.6125   5
   2 -11   4 2558.18 95.2415  17
   2 -11   5 13494.2 304.677  21
   2 -11   5 14548.8 317.020  34
   2 -11   5 14156.4 310.606  19
   2 -11   5 13443.2 320.138  18
   2 -11   5 14900.2 321.525  17
   2 -11   6 97.9086 23.9113  17
   2 -11   6 113.655 24.4243  18
   2 -11   6 93.9230 18.5619  19
   2 -11   6 100.378 23.6115  34
   2 -11   7 2911.90 90.5620  34
   2 -11   7 2773.51 83.6872  19
   2 -11   7 2845.36 92.0670  18
   2 -10 -14 5834.64 150.712  32
   2 -10 -14 5780.68 141.299  25
   2 -10 -14 5636.09 149.103  38
   2 -10 -13 1792.85 75.1888  38
   2 -10 -13 1677.45 64.1008  25
   2 -10 -13 1868.05 75.4142  32
   2 -10 -12 2740.54 98.4625  32
   2 -10 -12 2436.87 98.5822  41
   2 -10 -12 2560.84 86.2186  25
   2 -10 -12 2697.59 102.420  38
   2 -10 -11 5081.61 152.557  32
   2 -10 -11 4913.18 138.552  25
   2 -10 -11 5170.33 160.606  38
   2 -10 -11 4859.34 162.491  41
   2 -10 -10 8140.39 213.237  32
   2 -10 -10 8094.23 221.504  38
   2 -10 -10 7569.16 198.161   5
   2 -10 -10 7366.76 191.976  21
   2 -10 -10 7675.70 193.230  25
   2 -10 -10 7547.45 225.739  41
   2 -10  -9 16752.7 396.139  38
   2 -10  -9 16317.9 408.113  41
   2 -10  -9 16189.6 372.017  21
   2 -10  -9 16202.9 377.979   5
   2 -10  -9 16599.6 362.264  25
   2 -10  -9 17229.2 385.598  32
   2 -10  -8 100.232 30.7741  24
   2 -10  -8 131.725 21.7527  25
   2 -10  -8 132.515 38.2966  41
   2 -10  -8 103.290 33.6049  32
   2 -10  -8 133.313 38.3985  38
   2 -10  -8 118.861 26.6657  21
   2 -10  -8 124.312 27.7636   5
   2 -10  -7 7896.09 228.974   5
   2 -10  -7 8630.42 227.492  32
   2 -10  -7 7932.60 242.859  24
   2 -10  -7 8226.32 224.871  21
   2 -10  -7 7944.79 248.464  41
   2 -10  -7 8046.81 226.091  42
   2 -10  -7 8166.46 236.883  38
   2 -10  -7 7824.42 201.691  18
   2 -10  -6 11665.0 302.273  21
   2 -10  -6 11473.2 280.729  18
   2 -10  -6 11232.8 529.203   3
   2 -10  -6 12535.2 302.192  32
   2 -10  -6 11599.7 326.659  41
   2 -10  -6 11749.4 325.033  24
   2 -10  -6 11815.9 287.348  34
   2 -10  -6 12054.5 306.219  42
   2 -10  -6 11910.0 310.606   5
   2 -10  -6 12653.0 319.259  38
   2 -10  -5 23161.3 525.196   5
   2 -10  -5 23768.4 508.022  32
   2 -10  -5 21625.9 537.255  24
   2 -10  -5 23092.3 517.069  21
   2 -10  -5 22121.9 491.828  34
   2 -10  -5 22664.4 540.358  41
   2 -10  -5 22912.7 493.183  18
   2 -10  -5 21811.4 513.925  42
   2 -10  -5 22567.3 808.261   3
   2 -10  -5 23803.4 527.963  38
   2 -10  -4 5711.38 186.289  42
   2 -10  -4 5913.98 193.681  38
   2 -10  -4 5872.17 188.638  21
   2 -10  -4 5564.58 202.380  24
   2 -10  -4 5764.64 170.963  18
   2 -10  -4 5924.27 176.948  32
   2 -10  -4 5877.39 374.493   3
   2 -10  -4 5540.86 198.290  41
   2 -10  -4 5844.26 181.766  19
   2 -10  -4 5726.86 193.226   5
   2 -10  -4 5577.54 166.921  34
   2 -10  -3 2114.16 89.5055  34
   2 -10  -3 1925.49 100.353  42
   2 -10  -3 2169.70 94.1706  18
   2 -10  -3 2044.38 102.675  38
   2 -10  -3 2071.86 104.024  21
   2 -10  -3 1890.77 111.193  24
   2 -10  -3 1771.91 202.121   3
   2 -10  -3 2120.54 97.8199  19
   2 -10  -3 2066.26 92.7767  32
   2 -10  -3 2167.03 112.526  41
   2 -10  -3 2010.89 106.175   5
   2 -10  -2 377.615 46.6297  38
   2 -10  -2 323.342 45.3267  21
   2 -10  -2 377.080 48.6811  42
   2 -10  -2 412.956 44.4986  18
   2 -10  -2 303.349 44.1272  41
   2 -10  -2 342.970 51.2271   5
   2 -10  -2 385.459 45.4438  19
   2 -10  -2 364.742 55.5397  24
   2 -10  -2 352.387 38.1820  34
   2 -10  -2 249.793 98.2415   3
   2 -10  -2 393.190 41.3308  32
   2 -10  -1 777.580 53.1575  32
   2 -10  -1 723.554 61.9012  21
   2 -10  -1 738.326 62.1275  42
   2 -10  -1 775.670 133.877   3
   2 -10  -1 758.556 54.2541  34
   2 -10  -1 816.245 76.4610  24
   2 -10  -1 695.745 55.9003  18
   2 -10  -1 795.549 69.5450   5
   2 -10  -1 806.558 58.6104  19
   2 -10  -1 712.453 65.3184  41
   2 -10  -1 773.044 63.3495  38
   2 -10   0 3955.08 148.730  21
   2 -10   0 4241.85 137.767  34
   2 -10   0 3934.55 151.323  41
   2 -10   0 3972.09 132.907  32
   2 -10   0 4117.57 149.220  42
   2 -10   0 4040.29 163.217  24
   2 -10   0 4186.86 307.713   3
   2 -10   0 3833.93 146.385  38
   2 -10   0 4096.21 138.781  19
   2 -10   0 3763.24 150.540   5
   2 -10   1 11023.3 291.348  42
   2 -10   1 11271.0 523.094   3
   2 -10   1 11047.0 311.223  24
   2 -10   1 11222.5 279.834  19
   2 -10   1 11223.6 293.852  38
   2 -10   1 10979.9 271.910  32
   2 -10   1 10985.8 299.444   5
   2 -10   1 11286.9 280.028  34
   2 -10   1 11215.6 294.958  21
   2 -10   2 1197.44 81.9025  24
   2 -10   2 1074.27 74.3910   5
   2 -10   2 1108.75 71.9689  21
   2 -10   2 1138.06 72.5103  38
   2 -10   2 1128.15 67.5904  34
   2 -10   2 1128.26 70.7177  42
   2 -10   2 1076.56 58.2331  32
   2 -10   2 1104.05 65.0379  19
   2 -10   2 1069.93 61.3888  20
   2 -10   2 924.504 142.483   3
   2 -10   3 62.2101 24.7308  38
   2 -10   3 110.630 20.7082  39
   2 -10   3 79.6092 25.1030  19
   2 -10   3 91.9482 28.7423   5
   2 -10   3 58.9713 17.7099  30
   2 -10   3 73.9101 23.8985  20
   2 -10   3 95.6257 30.7391  34
   2 -10   3 71.5995 25.6157  42
   2 -10   3 48.5355 31.9350  24
   2 -10   3 102.283 33.5078  17
   2 -10   3 159.046 32.9952  21
   2 -10   3 62.2923 15.0988  32
   2 -10   4 2985.16 115.085  17
   2 -10   4 2962.83 112.476  34
   2 -10   4 2724.13 104.677  20
   2 -10   4 2761.44 116.483  24
   2 -10   4 2897.80 111.932  21
   2 -10   4 2732.54 96.5270  30
   2 -10   4 3148.05 119.505   5
   2 -10   4 2786.50 94.0128  39
   2 -10   5 221.437 34.9170  34
   2 -10   5 237.632 38.7853  17
   2 -10   5 130.001 22.8676  30
   2 -10   5 190.182 29.3307  21
   2 -10   5 148.213 21.0942  39
   2 -10   5 163.566 26.9845   5
   2 -10   5 185.636 31.2884  20
   2 -10   6 3218.70 113.443  34
   2 -10   6 3035.64 99.7469  21
   2 -10   6 2995.87 101.086  30
   2 -10   6 2983.83 108.357  20
   2 -10   6 3006.03 111.558  17
   2 -10   7 117.214 27.5553  17
   2 -10   7 157.202 29.5880  34
   2 -10   7 143.126 24.0400  30
   2 -10   7 106.530 25.5486  20
   2 -10   8 4627.81 138.817  17
   2 -10   8 4725.65 140.989  18
   2 -10   8 4660.98 138.661  20
   2 -10   8 4785.65 132.113  30
   2 -10   8 4915.83 141.024  34
   2 -10   9 916.594 50.1065  20
   2 -10   9 888.982 45.1193  30
   2 -10   9 972.104 51.1090  34
   2 -10   9 851.755 46.6748  18
   2 -10  10 612.766 33.9141  18
   2 -10  10 676.119 39.5643  20
   2 -10  10 619.539 34.1111  30
   2 -10  10 606.083 37.1276  34
   2  -9 -15 923.914 49.8839  32
   2  -9 -15 933.720 47.7961  25
   2  -9 -15 887.330 47.4704  38
   2  -9 -14 2832.93 100.033  38
   2  -9 -14 2779.07 95.5200  25
   2  -9 -14 2815.46 99.8127  32
   2  -9 -14 2510.68 79.9071  26
   2  -9 -13 7195.09 197.637  38
   2  -9 -13 7022.53 192.690  32
   2  -9 -13 6928.87 186.704  25
   2  -9 -13 6681.12 189.913  41
   2  -9 -13 6909.16 178.701   2
   2  -9 -13 6902.95 169.355  26
   2  -9 -12 219.628 23.4844  26
   2  -9 -12 185.713 23.4358   2
   2  -9 -12 200.768 30.1875  25
   2  -9 -12 175.653 31.3885  41
   2  -9 -12 198.020 34.7140  32
   2  -9 -12 255.009 38.6113  38
   2  -9 -11 36.0734 14.2452  26
   2  -9 -11 94.2192 34.6492  32
   2  -9 -11 72.1511 28.5929  38
   2  -9 -11 30.1963 15.4841   2
   2  -9 -11 44.7464 22.0149  25
   2  -9 -11 59.0369 24.3237  41
   2  -9 -10 3148.82 104.273   2
   2  -9 -10 3305.48 124.913  32
   2  -9 -10 2873.77 109.302   5
   2  -9 -10 3068.35 107.124  21
   2  -9 -10 2936.73 111.289  25
   2  -9 -10 3156.17 129.821  38
   2  -9 -10 3011.31 132.289  41
   2  -9  -9 2428.31 99.6514  21
   2  -9  -9 2575.22 90.9598  33
   2  -9  -9 2655.18 112.241  32
   2  -9  -9 2634.42 119.226  38
   2  -9  -9 2275.36 107.832  24
   2  -9  -9 2589.19 101.059  25
   2  -9  -9 2470.34 104.166   5
   2  -9  -9 2547.25 123.416  41
   2  -9  -9 2521.78 102.173  42
   2  -9  -8 194.314 43.6274  41
   2  -9  -8 291.338 44.4630  32
   2  -9  -8 240.916 27.6128  33
   2  -9  -8 203.232 31.7983  21
   2  -9  -8 171.294 38.0502  24
   2  -9  -8 239.494 43.1379  38
   2  -9  -8 250.053 32.5120  25
   2  -9  -8 302.684 39.6213   5
   2  -9  -8 197.872 33.8736  42
   2  -9  -8 143.339 61.2434   3
   2  -9  -7 6386.74 177.415  25
   2  -9  -7 6301.31 168.577  33
   2  -9  -7 5844.14 214.730  22
   2  -9  -7 6382.19 193.009  32
   2  -9  -7 6232.77 203.209  38
   2  -9  -7 5838.44 210.017  41
   2  -9  -7 6164.14 187.852  21
   2  -9  -7 6208.94 206.524  24
   2  -9  -7 5559.81 350.270   3
   2  -9  -7 6260.90 193.908   5
   2  -9  -7 6032.26 188.834  42
   2  -9  -7 6185.39 170.316  18
   2  -9  -6 3036.08 142.524  22
   2  -9  -6 2756.03 132.033  24
   2  -9  -6 2928.15 251.017   3
   2  -9  -6 3016.89 111.159  34
   2  -9  -6 2920.26 119.851  42
   2  -9  -6 2952.71 106.622  18
   2  -9  -6 2771.08 116.138  21
   2  -9  -6 3012.66 102.059  33
   2  -9  -6 3009.75 130.183  38
   2  -9  -6 2918.69 104.889  25
   2  -9  -6 3224.17 123.532  32
   2  -9  -6 3013.45 138.422  41
   2  -9  -6 2873.80 122.075   5
   2  -9  -5 677.022 44.1961  33
   2  -9  -5 573.290 60.7926  41
   2  -9  -5 686.883 50.2612  34
   2  -9  -5 604.672 62.9343  24
   2  -9  -5 674.953 67.3736  22
   2  -9  -5 670.675 45.0617  25
   2  -9  -5 670.718 57.0423  21
   2  -9  -5 677.426 56.8209  19
   2  -9  -5 690.548 49.4107  18
   2  -9  -5 745.802 58.7381  42
   2  -9  -5 609.904 121.207   3
   2  -9  -5 675.673 60.3309   5
   2  -9  -5 632.242 54.3124  32
   2  -9  -5 762.850 65.3511  38
   2  -9  -4 6405.04 170.567  33
   2  -9  -4 6654.16 195.322  32
   2  -9  -4 6463.00 185.382  18
   2  -9  -4 6619.94 205.679   5
   2  -9  -4 6238.16 378.898   3
   2  -9  -4 6812.17 202.522  21
   2  -9  -4 6068.99 195.002  42
   2  -9  -4 6276.71 179.453  34
   2  -9  -4 6456.71 218.759  22
   2  -9  -4 6476.84 216.203  41
   2  -9  -4 6374.03 194.750  19
   2  -9  -4 6314.09 204.971  38
   2  -9  -3 2137.40 115.368  41
   2  -9  -3 2549.72 91.1713  33
   2  -9  -3 2481.36 112.271  42
   2  -9  -3 2401.88 101.932  18
   2  -9  -3 2536.55 124.520  22
   2  -9  -3 2513.38 236.771   3
   2  -9  -3 2260.06 108.507  21
   2  -9  -3 2623.75 109.119  32
   2  -9  -3 2260.56 112.367   5
   2  -9  -3 2804.57 112.194  19
   2  -9  -3 2626.94 100.124  34
   2  -9  -3 2471.38 129.068  24
   2  -9  -3 2224.63 111.665  38
   2  -9  -2 964.544 144.123   3
   2  -9  -2 1120.70 73.7236  42
   2  -9  -2 1070.46 62.9628  34
   2  -9  -2 1035.46 66.3123  32
   2  -9  -2 980.964 71.2405  21
   2  -9  -2 1076.16 77.1920  41
   2  -9  -2 1100.87 76.5530  38
   2  -9  -2 1012.32 73.4862   5
   2  -9  -2 1204.58 70.1595  19
   2  -9  -2 1165.01 81.0369  22
   2  -9  -2 1031.23 54.7117  33
   2  -9  -2 881.904 75.1780  24
   2  -9  -1 827.835 134.915   3
   2  -9  -1 898.821 50.1760  33
   2  -9  -1 906.939 70.3732  22
   2  -9  -1 921.057 65.6898  42
   2  -9  -1 748.849 67.1114   5
   2  -9  -1 984.144 61.9494  34
   2  -9  -1 981.896 62.9388  32
   2  -9  -1 778.400 65.6139  21
   2  -9  -1 768.579 72.3559  24
   2  -9  -1 961.926 70.4928  38
   2  -9  -1 925.569 70.0706  41
   2  -9  -1 984.482 63.1740  19
   2  -9   0 338.082 48.0990  24
   2  -9   0 369.762 35.8914  20
   2  -9   0 314.583 45.4464  38
   2  -9   0 340.748 40.2973  19
   2  -9   0 341.601 47.1281  41
   2  -9   0 289.732 38.6679  34
   2  -9   0 392.546 47.8763  42
   2  -9   0 371.296 33.3653  33
   2  -9   0 293.819 43.3969   5
   2  -9   0 310.812 43.2080  21
   2  -9   0 378.076 46.8024  22
   2  -9   0 263.441 89.7323   3
   2  -9   0 348.523 38.7779  32
   2  -9   0 334.595 33.2549  39
   2  -9   1 23791.9 540.222  42
   2  -9   1 24100.5 509.840  33
   2  -9   1 24374.5 565.330  24
   2  -9   1 23486.9 545.359  38
   2  -9   1 23850.1 544.275  21
   2  -9   1 25145.8 555.674   5
   2  -9   1 24169.4 827.718   3
   2  -9   1 24015.2 528.138  34
   2  -9   1 25049.1 532.588  32
   2  -9   1 23516.9 547.232  41
   2  -9   1 23044.0 518.680  20
   2  -9   1 25545.2 516.528  39
   2  -9   2 1175.47 67.3392  32
   2  -9   2 1111.29 73.5258  21
   2  -9   2 1202.52 66.4408  20
   2  -9   2 1158.06 73.0986  42
   2  -9   2 1191.27 79.1434   5
   2  -9   2 1290.56 169.002   3
   2  -9   2 1205.01 76.1453  38
   2  -9   2 1144.34 59.9885  30
   2  -9   2 1155.00 80.2541  24
   2  -9   2 1246.71 72.7687  34
   2  -9   2 1214.51 60.6273  33
   2  -9   2 1198.28 60.7859  39
   2  -9   3 690.041 58.4882  21
   2  -9   3 896.771 141.381   3
   2  -9   3 812.569 50.1428  39
   2  -9   3 703.939 55.1815  34
   2  -9   3 800.895 51.2176  30
   2  -9   3 777.510 60.9801  38
   2  -9   3 835.304 54.6260  32
   2  -9   3 753.532 54.8290  20
   2  -9   3 786.950 65.4656  24
   2  -9   3 767.157 59.8046  42
   2  -9   3 743.629 46.6839  33
   2  -9   3 785.611 63.9398   5
   2  -9   4 212.679 26.6331  33
   2  -9   4 224.633 27.6249  39
   2  -9   4 229.284 38.5594  21
   2  -9   4 236.431 39.2805  34
   2  -9   4 248.354 38.3446  24
   2  -9   4 183.439 27.1609  32
   2  -9   4 189.178 27.7622  30
   2  -9   4 167.994 64.1605   3
   2  -9   4 225.352 36.0771   5
   2  -9   4 210.758 34.3810  42
   2  -9   4 216.149 35.1220  38
   2  -9   4 227.081 36.6048  20
   2  -9   5 7752.67 215.576  21
   2  -9   5 7520.18 218.931   5
   2  -9   5 7554.44 195.632  33
   2  -9   5 7602.76 211.952  42
   2  -9   5 7324.91 218.277  24
   2  -9   5 7617.84 396.608   3
   2  -9   5 7589.64 211.014  20
   2  -9   5 7420.22 216.937  17
   2  -9   5 7907.19 215.254  34
   2  -9   5 7608.17 198.574  32
   2  -9   5 7538.57 203.856  30
   2  -9   5 7644.85 198.129  39
   2  -9   6 65.9595 31.5147  34
   2  -9   6 108.499 30.0530  20
   2  -9   6 93.1729 21.9102  33
   2  -9   6 75.2646 21.7705  21
   2  -9   6 50.7222 29.5158  17
   2  -9   6 78.0047 19.4023  39
   2  -9   6 99.2829 26.8974  30
   2  -9   6 66.2707 22.6858   5
   2  -9   7 36.6400 25.1952  20
   2  -9   7 11.1245 28.8342  34
   2  -9   7 69.6431 20.6157  39
   2  -9   7-17.4499 29.5424  17
   2  -9   7-8.25356 15.0649  33
   2  -9   7-18.9128 23.7344  30
   2  -9   8 3614.28 110.571  33
   2  -9   8 3636.73 114.167  39
   2  -9   8 3652.70 128.987  17
   2  -9   8 3463.17 122.387  30
   2  -9   8 3850.22 129.068  20
   2  -9   8 3840.51 129.276  34
   2  -9   9 16874.0 370.886  39
   2  -9   9 17479.2 386.277  30
   2  -9   9 17571.0 390.854  20
   2  -9   9 16842.7 388.219  17
   2  -9   9 18048.1 390.403  34
   2  -9   9 17042.8 365.480  33
   2  -9  10 1598.46 71.9288  34
   2  -9  10 1588.39 71.9778  30
   2  -9  10 1690.96 75.6648  20
   2  -9  11 1990.69 75.9452  30
   2  -9  11 1974.31 76.4459  34
   2  -9  11 1927.83 70.6201  18
   2  -9  11 1980.17 78.7379  20
   2  -9  12 936.481 45.3949  30
   2  -9  12 967.545 47.2871  34
   2  -9  12 999.063 49.1565  20
   2  -8 -16 7476.95 188.183  32
   2  -8 -16 6934.59 174.841  38
   2  -8 -16 7347.44 175.448  26
   2  -8 -16 7691.32 190.368  25
   2  -8 -15 1814.49 80.0994  32
   2  -8 -15 1946.62 82.4426  25
   2  -8 -15 1765.39 74.2730   2
   2  -8 -15 1889.08 71.5776  26
   2  -8 -15 1678.38 74.8275  38
   2  -8 -14 164.930 26.1384  26
   2  -8 -14 169.256 34.4774  32
   2  -8 -14 232.405 32.9709  38
   2  -8 -14 96.5528 22.5331   2
   2  -8 -14 158.119 33.9192  25
   2  -8 -13 2068.97 96.7801  25
   2  -8 -13 2056.63 83.1708  26
   2  -8 -13 1938.63 85.4400   2
   2  -8 -13 2204.13 94.4563  41
   2  -8 -13 2094.66 96.1842  38
   2  -8 -12 3110.87 123.895  32
   2  -8 -12 3118.30 125.605  38
   2  -8 -12 3157.47 121.777  25
   2  -8 -12 2983.51 109.446   2
   2  -8 -12 3053.58 242.527   1
   2  -8 -12 3089.29 107.340  26
   2  -8 -12 2907.89 120.974  41
   2  -8 -11 1184.12 77.3374  38
   2  -8 -11 1050.62 59.0328  26
   2  -8 -11 1136.32 62.8159   2
   2  -8 -11 1122.44 75.8098  41
   2  -8 -11 1199.09 74.8144  32
   2  -8 -11 947.625 131.352   1
   2  -8 -11 1084.43 70.4416  25
   2  -8 -10 20589.1 477.367  38
   2  -8 -10 20127.1 466.408  32
   2  -8 -10 19958.4 693.135   1
   2  -8 -10 20447.5 444.471   2
   2  -8 -10 20525.4 462.895  25
   2  -8 -10 19601.2 438.939  26
   2  -8 -10 20381.9 483.549  41
   2  -8  -9 46613.1 983.071  32
   2  -8  -9 46608.3 954.189   2
   2  -8  -9 49925.6 1266.77   1
   2  -8  -9 49995.5 970.852  42
   2  -8  -9 46648.1 974.196  25
   2  -8  -9 47945.6 967.355  21
   2  -8  -9 46042.1 983.179  24
   2  -8  -9 49342.6 955.486  26
   2  -8  -9 48761.0 998.271  38
   2  -8  -9 48457.2 1268.14   3
   2  -8  -9 47401.6 1004.85  41
   2  -8  -9 47551.3 974.715   5
   2  -8  -8 1595.23 91.4848  38
   2  -8  -8 1580.47 80.4747  21
   2  -8  -8 1647.19 81.4009  42
   2  -8  -8 1545.21 159.539   1
   2  -8  -8 1602.49 82.5248   5
   2  -8  -8 1516.90 94.9206  22
   2  -8  -8 1606.52 80.8812  25
   2  -8  -8 1514.45 93.1125  41
   2  -8  -8 1675.52 72.3947   2
   2  -8  -8 1582.87 86.6434  32
   2  -8  -8 1436.46 166.356   3
   2  -8  -8 1488.13 85.9397  24
   2  -8  -8 1637.37 70.1085  26
   2  -8  -7 1061.07 144.570   3
   2  -8  -7 1209.35 83.5017  41
   2  -8  -7 1249.30 138.888   1
   2  -8  -7 1515.43 81.8641  32
   2  -8  -7 1193.37 79.0248  38
   2  -8  -7 1160.28 67.8373  21
   2  -8  -7 1228.88 71.2592  42
   2  -8  -7 1138.09 65.5189  34
   2  -8  -7 1148.65 70.7025   5
   2  -8  -7 1185.13 84.2915  22
   2  -8  -7 1245.61 61.7893  37
   2  -8  -7 1235.25 59.0548   2
   2  -8  -7 1174.05 78.4955  24
   2  -8  -7 1494.96 75.5913  25
   2  -8  -6 29517.9 678.884  41
   2  -8  -6 30587.5 670.785  38
   2  -8  -6 32149.9 859.507   1
   2  -8  -6 31521.5 646.702  25
   2  -8  -6 31081.8 660.847  32
   2  -8  -6 31039.1 635.230  37
   2  -8  -6 29466.6 639.409  34
   2  -8  -6 30439.4 652.447  21
   2  -8  -6 31020.4 658.522   5
   2  -8  -6 30226.4 686.556  22
   2  -8  -6 30554.5 634.944  18
   2  -8  -6 30897.5 654.756  42
   2  -8  -6 30849.2 679.355  24
   2  -8  -6 30180.4 925.430   3
   2  -8  -5 15312.4 393.235  22
   2  -8  -5 14905.6 349.638  34
   2  -8  -5 15981.2 371.503  32
   2  -8  -5 15323.7 371.109  19
   2  -8  -5 15661.2 601.844   3
   2  -8  -5 15245.1 379.075  38
   2  -8  -5 15075.5 349.338  37
   2  -8  -5 15058.6 387.397  41
   2  -8  -5 15401.1 366.045  42
   2  -8  -5 15000.8 351.806  25
   2  -8  -5 15967.1 514.339   1
   2  -8  -5 15976.6 345.803  33
   2  -8  -5 15602.2 390.436  24
   2  -8  -5 15378.9 352.601  18
   2  -8  -5 15390.5 365.034  21
   2  -8  -5 15362.8 370.353   5
   2  -8  -4 146.126 24.8761  37
   2  -8  -4 192.125 73.9448   3
   2  -8  -4 145.055 31.0448   5
   2  -8  -4 172.202 33.8341  42
   2  -8  -4 207.361 25.5425  33
   2  -8  -4 136.823 27.3402  32
   2  -8  -4 130.492 24.0521  18
   2  -8  -4 200.852 40.6220  22
   2  -8  -4 128.460 20.7246  25
   2  -8  -4 188.532 34.1574  21
   2  -8  -4 104.307 20.9966  34
   2  -8  -4 191.697 37.8457  41
   2  -8  -4 196.312 33.9229  19
   2  -8  -4 138.889 32.1609  38
   2  -8  -4 190.734 36.3248  24
   2  -8  -3 11467.8 292.477  32
   2  -8  -3 11548.1 270.777  33
   2  -8  -3 12338.4 294.467  19
   2  -8  -3 11237.3 301.149  38
   2  -8  -3 11789.9 295.647  21
   2  -8  -3 11803.2 311.323  41
   2  -8  -3 11105.0 310.640  24
   2  -8  -3 12024.1 315.737  22
   2  -8  -3 11284.6 292.493  42
   2  -8  -3 10993.7 491.135   3
   2  -8  -3 11634.0 281.586  37
   2  -8  -3 11705.5 298.424   5
   2  -8  -3 11546.8 276.856  34
   2  -8  -2 29724.8 634.490  21
   2  -8  -2 29621.8 906.850   3
   2  -8  -2 29198.5 656.187  24
   2  -8  -2 29569.0 606.582  33
   2  -8  -2 28867.4 640.736  38
   2  -8  -2 29224.3 629.367  32
   2  -8  -2 29846.3 616.306  34
   2  -8  -2 30158.1 641.064   5
   2  -8  -2 29539.2 625.127  19
   2  -8  -2 30017.3 652.813  22
   2  -8  -2 29763.0 650.959  41
   2  -8  -2 28892.9 631.053  42
   2  -8  -1 1446.78 65.4433  33
   2  -8  -1 1419.04 71.1035  34
   2  -8  -1 1555.48 90.6275  24
   2  -8  -1 1484.79 80.0031  21
   2  -8  -1 1421.23 83.0806  41
   2  -8  -1 1500.23 85.3956  22
   2  -8  -1 1485.37 82.6501  38
   2  -8  -1 1543.88 75.2182  19
   2  -8  -1 1425.06 75.8116  32
   2  -8  -1 1443.75 80.4574   5
   2  -8  -1 1694.38 82.8458  42
   2  -8  -1 1715.03 180.463   3
   2  -8  -1 1544.59 69.2078  20
   2  -8   0 6453.61 358.582   3
   2  -8   0 6194.05 171.587  33
   2  -8   0 6511.00 174.104  39
   2  -8   0 6828.62 202.376  22
   2  -8   0 6802.37 194.456  42
   2  -8   0 6440.49 196.371   5
   2  -8   0 6575.82 194.289  21
   2  -8   0 6650.67 208.625  24
   2  -8   0 6500.03 198.100  38
   2  -8   0 6306.07 177.283  20
   2  -8   0 6298.18 187.221  32
   2  -8   0 6645.16 183.340  34
   2  -8   0 6496.78 199.988  41
   2  -8   1 4880.97 307.080   3
   2  -8   1 4807.12 141.251  33
   2  -8   1 4886.60 161.158  21
   2  -8   1 5042.79 163.721  22
   2  -8   1 4880.70 140.734  30
   2  -8   1 5093.18 166.844   5
   2  -8   1 4850.92 151.404  34
   2  -8   1 5000.97 143.442  39
   2  -8   1 5065.94 160.030  42
   2  -8   1 5031.76 165.456  41
   2  -8   1 4800.04 154.795  32
   2  -8   1 4920.40 171.467  24
   2  -8   1 4535.67 160.381  38
   2  -8   1 4851.02 147.551  20
   2  -8   2 890.646 52.3421  33
   2  -8   2 1049.91 61.9783  32
   2  -8   2 961.975 53.6812  30
   2  -8   2 1000.14 60.1224  34
   2  -8   2 1077.15 66.1201  42
   2  -8   2 994.714 66.6054  21
   2  -8   2 923.243 63.8639  38
   2  -8   2 985.992 57.9272  20
   2  -8   2 920.462 134.145   3
   2  -8   2 1063.20 70.6352   5
   2  -8   2 942.672 63.8085  41
   2  -8   2 1076.45 72.5968  24
   2  -8   2 1007.57 63.3259  22
   2  -8   2 1075.07 56.3057  39
   2  -8   3 1592.22 79.1081  32
   2  -8   3 1630.50 88.7553  24
   2  -8   3 1686.43 80.5415  34
   2  -8   3 1816.64 86.8052  42
   2  -8   3 1685.84 74.2215  39
   2  -8   3 1622.02 85.3385  38
   2  -8   3 1565.30 71.8826  33
   2  -8   3 1636.05 84.9396  21
   2  -8   3 1586.39 172.250   3
   2  -8   3 1679.37 77.6568  20
   2  -8   3 1597.58 73.4745  30
   2  -8   3 1654.21 86.9061   5
   2  -8   4 11904.7 306.861   5
   2  -8   4 11867.4 307.275  24
   2  -8   4 11457.8 289.533  32
   2  -8   4 11824.6 283.048  39
   2  -8   4 11540.9 279.760  33
   2  -8   4 11634.7 295.779  42
   2  -8   4 11809.6 300.958  21
   2  -8   4 11661.0 302.833  38
   2  -8   4 11939.7 506.161   3
   2  -8   4 12049.6 292.157  34
   2  -8   4 12012.5 286.759  30
   2  -8   4 12446.8 292.261  20
   2  -8   5 609.990 53.5997  38
   2  -8   5 604.906 51.9584   5
   2  -8   5 623.311 108.202   3
   2  -8   5 592.887 43.0775  33
   2  -8   5 663.145 53.9087  24
   2  -8   5 599.497 50.6888  21
   2  -8   5 689.406 52.8280  34
   2  -8   5 596.794 46.0384  39
   2  -8   5 585.189 47.1814  30
   2  -8   5 614.671 41.8792  36
   2  -8   5 571.404 49.3012  20
   2  -8   5 663.480 51.2230  42
   2  -8   5 564.128 45.4693  32
   2  -8   6 7935.95 218.335  21
   2  -8   6 7772.35 207.361  33
   2  -8   6 8129.54 224.801   5
   2  -8   6 8121.11 204.986  36
   2  -8   6 7774.52 220.643  24
   2  -8   6 7946.33 210.755  32
   2  -8   6 8154.07 218.296  30
   2  -8   6 8326.17 220.796  34
   2  -8   6 7878.72 215.382  42
   2  -8   6 7530.64 382.572   3
   2  -8   6 7531.97 222.087  17
   2  -8   6 7891.76 211.055  39
   2  -8   7 220.293 35.6352  30
   2  -8   7 245.433 31.4197  36
   2  -8   7 245.726 28.5860  32
   2  -8   7 272.364 39.6466  34
   2  -8   7 275.999 32.9290  33
   2  -8   7 286.424 40.9266  17
   2  -8   7 268.795 34.0211  39
   2  -8   8 5334.98 161.333  34
   2  -8   8 4732.04 148.937  39
   2  -8   8 4931.96 148.079  33
   2  -8   8 5108.96 148.949  36
   2  -8   8 4962.39 164.492  17
   2  -8   8 4895.85 159.662  30
   2  -8   9 18.4667 18.8918  33
   2  -8   9 25.8914 25.5326  30
   2  -8   9 70.5096 32.4219  34
   2  -8   9 105.042 29.9872  17
   2  -8   9 38.6499 20.7732  39
   2  -8   9 52.3907 22.3883  36
   2  -8  10 8521.90 216.033  33
   2  -8  10 8799.05 228.557  34
   2  -8  10 8858.93 234.381  17
   2  -8  10 9068.70 232.708  20
   2  -8  10 8348.53 218.406  39
   2  -8  10 8937.32 232.888  30
   2  -8  11 4619.05 132.438  33
   2  -8  11 4951.78 146.236  34
   2  -8  11 4975.56 149.336  20
   2  -8  11 4477.92 134.768  39
   2  -8  11 4881.60 148.501  30
   2  -8  12 2233.95 85.7671  34
   2  -8  12 2122.59 77.8144  39
   2  -8  12 2283.73 89.0829  20
   2  -8  12 2137.43 85.7195  30
   2  -8  13 1644.30 66.6853  34
   2  -8  13 1571.88 68.0543  20
   2  -8  13 1699.96 69.3871  30
   2  -7 -17 1964.60 72.2388  26
   2  -7 -17 1820.38 75.9477  25
   2  -7 -17 1790.98 71.8620  32
   2  -7 -16 2713.62 96.2090  26
   2  -7 -16 2758.38 100.445   2
   2  -7 -16 2549.76 101.948  25
   2  -7 -16 2665.40 100.454  32
   2  -7 -15 6669.97 192.964  32
   2  -7 -15 6834.41 186.733  26
   2  -7 -15 6881.58 190.442   2
   2  -7 -15 6949.77 199.857  25
   2  -7 -15 6433.29 184.297  38
   2  -7 -14 5755.45 180.604  32
   2  -7 -14 5845.64 176.039   2
   2  -7 -14 6007.13 187.465  25
   2  -7 -14 6026.70 180.147  38
   2  -7 -13 1440.19 80.1194  38
   2  -7 -13 1558.24 84.8954  32
   2  -7 -13 1484.74 77.2138   2
   2  -7 -13 1457.63 174.702   1
   2  -7 -13 1441.82 85.3686  25
   2  -7 -12 3850.90 139.052  41
   2  -7 -12 3758.94 278.481   1
   2  -7 -12 3629.27 140.817  38
   2  -7 -12 3792.26 132.225   2
   2  -7 -12 3767.82 142.675  32
   2  -7 -12 3914.49 146.130  25
   2  -7 -11 1525.66 87.3443  25
   2  -7 -11 1284.47 157.362   1
   2  -7 -11 1601.88 86.7431  32
   2  -7 -11 1562.86 77.3572   2
   2  -7 -11 1470.71 82.7217  41
   2  -7 -11 1631.54 88.8899  38
   2  -7 -10 4000.64 148.272  38
   2  -7 -10 4061.44 147.382  32
   2  -7 -10 4188.14 281.136   1
   2  -7 -10 4045.61 147.350  25
   2  -7 -10 3865.77 149.489  41
   2  -7 -10 4192.99 134.643   2
   2  -7  -9 2772.42 116.108  25
   2  -7  -9 3012.24 111.417   5
   2  -7  -9 2772.74 119.856  38
   2  -7  -9 2992.37 105.782   2
   2  -7  -9 2973.35 107.703  42
   2  -7  -9 2752.46 121.883  41
   2  -7  -9 2798.71 115.503  24
   2  -7  -9 2888.92 107.066  21
   2  -7  -9 2910.05 225.585   1
   2  -7  -9 2868.82 216.912   3
   2  -7  -9 2909.48 118.934  32
   2  -7  -8 17832.9 612.800   3
   2  -7  -8 17022.7 394.798  21
   2  -7  -8 18252.1 607.968   1
   2  -7  -8 17356.2 412.678  24
   2  -7  -8 17430.7 400.920   5
   2  -7  -8 18298.1 389.781   2
   2  -7  -8 17008.6 404.214  25
   2  -7  -8 17148.9 426.556  22
   2  -7  -8 17535.6 423.444  41
   2  -7  -8 17916.1 396.362  42
   2  -7  -8 17792.7 412.283  32
   2  -7  -8 16860.5 414.106  38
   2  -7  -7 19.8293 13.6212  37
   2  -7  -7-6.73829 17.4408  34
   2  -7  -7-7.32288 38.6684   1
   2  -7  -7 60.9616 21.7299  25
   2  -7  -7 5.87895 15.3565  26
   2  -7  -7-7.89321 19.1751  24
   2  -7  -7 20.2881 15.9760   2
   2  -7  -7 41.0227 27.4219  22
   2  -7  -7 20.3017 17.1981  21
   2  -7  -7 39.9903 25.3315  41
   2  -7  -7 4.34468 37.4271   3
   2  -7  -7 30.5709 18.3535  42
   2  -7  -7 19.6403 17.4597   5
   2  -7  -7 9.14591 20.4466  32
   2  -7  -7 22.5254 20.3548  38
   2  -7  -6 24477.3 506.685  37
   2  -7  -6 23780.0 518.599  42
   2  -7  -6 22724.3 517.718  25
   2  -7  -6 23342.5 514.510  34
   2  -7  -6 24594.0 549.790  22
   2  -7  -6 24733.5 542.064  24
   2  -7  -6 24581.7 544.865  41
   2  -7  -6 23960.6 505.104  26
   2  -7  -6 24284.6 518.669  21
   2  -7  -6 24359.5 749.171   3
   2  -7  -6 24197.7 523.238   5
   2  -7  -6 25096.6 710.853   1
   2  -7  -6 23344.2 533.616  38
   2  -7  -6 24822.4 531.795  32
   2  -7  -6 24570.2 501.311   2
   2  -7  -5 12620.6 299.436  34
   2  -7  -5 13302.1 286.608   2
   2  -7  -5 12921.7 314.628  32
   2  -7  -5 12394.1 296.658  18
   2  -7  -5 13579.0 313.665   5
   2  -7  -5 12833.3 296.069  37
   2  -7  -5 13307.3 450.629   1
   2  -7  -5 12405.5 317.574  38
   2  -7  -5 12386.1 491.632   3
   2  -7  -5 12993.2 331.083  22
   2  -7  -5 12607.7 315.244  19
   2  -7  -5 13507.3 309.581  21
   2  -7  -5 12845.6 326.122  24
   2  -7  -5 13151.5 327.848  41
   2  -7  -5 13347.6 309.553  42
   2  -7  -5 12045.8 301.759  25
   2  -7  -4 603.128 46.6260   5
   2  -7  -4 702.598 49.9976  42
   2  -7  -4 618.283 54.0740  22
   2  -7  -4 636.188 48.2671  19
   2  -7  -4 640.738 43.1931  25
   2  -7  -4 632.503 42.5942  34
   2  -7  -4 576.037 81.0336   1
   2  -7  -4 627.844 48.0993  32
   2  -7  -4 588.684 46.7081  49
   2  -7  -4 595.128 49.1430  38
   2  -7  -4 688.030 43.8635  37
   2  -7  -4 731.395 55.9362  41
   2  -7  -4 643.179 54.0864  24
   2  -7  -4 635.811 47.5581  21
   2  -7  -4 589.064 97.4901   3
   2  -7  -3 3706.71 245.797   3
   2  -7  -3 3828.21 278.674  23
   2  -7  -3 3960.65 121.882  34
   2  -7  -3 4064.23 144.165  24
   2  -7  -3 3648.94 119.485  25
   2  -7  -3 4262.19 135.887   5
   2  -7  -3 3898.99 131.718  32
   2  -7  -3 3971.92 118.782  33
   2  -7  -3 4035.04 200.964   1
   2  -7  -3 4166.66 132.649  21
   2  -7  -3 4252.68 133.452  19
   2  -7  -3 4004.02 123.740  37
   2  -7  -3 4009.74 140.646  41
   2  -7  -3 4088.59 131.882  42
   2  -7  -3 3783.90 135.531  38
   2  -7  -3 3933.53 130.642  49
   2  -7  -3 4053.72 143.134  22
   2  -7  -2 1086.04 148.709  23
   2  -7  -2 1217.52 60.9540  37
   2  -7  -2 1165.48 70.3882  24
   2  -7  -2 1082.65 132.802   3
   2  -7  -2 1315.80 70.0929  38
   2  -7  -2 1157.42 58.2682  34
   2  -7  -2 1208.20 65.0186  21
   2  -7  -2 1266.03 64.0138  19
   2  -7  -2 1218.53 66.3871   5
   2  -7  -2 1161.99 63.6714  32
   2  -7  -2 1229.98 66.2668  49
   2  -7  -2 1218.03 65.2353  42
   2  -7  -2 1268.64 71.0298  41
   2  -7  -2 1266.48 72.2859  22
   2  -7  -2 1119.67 54.6053  33
   2  -7  -2 1176.18 97.8395   1
   2  -7  -1 9787.33 255.077  41
   2  -7  -1 9402.03 244.969  32
   2  -7  -1 9760.55 252.362  38
   2  -7  -1 9920.50 242.448  37
   2  -7  -1 9349.61 244.535  21
   2  -7  -1 9339.00 229.125  33
   2  -7  -1 9189.46 245.831   5
   2  -7  -1 9462.39 412.944   3
   2  -7  -1 10238.6 264.359  24
   2  -7  -1 10252.7 466.098  23
   2  -7  -1 10115.6 248.416  42
   2  -7  -1 9593.59 236.190  34
   2  -7  -1 10456.7 251.113  49
   2  -7  -1 10057.9 259.828  22
   2  -7   0 14466.5 322.457  37
   2  -7   0 14202.3 332.808  41
   2  -7   0 14347.5 520.798   3
   2  -7   0 12902.6 318.635  32
   2  -7   0 13641.0 323.232  21
   2  -7   0 14233.4 323.509  49
   2  -7   0 13569.1 325.243   5
   2  -7   0 13486.0 309.086  20
   2  -7   0 13952.5 338.654  24
   2  -7   0 13556.1 330.751  22
   2  -7   0 14291.1 323.407  42
   2  -7   0 13877.0 556.650  23
   2  -7   0 13228.4 311.381  34
   2  -7   0 13429.7 306.204  33
   2  -7   0 13346.1 326.220  38
   2  -7   1 5901.10 163.045  33
   2  -7   1 6336.85 178.865  21
   2  -7   1 5801.79 173.865  32
   2  -7   1 6116.73 181.407  41
   2  -7   1 6367.59 177.605  42
   2  -7   1 6247.25 163.287  30
   2  -7   1 6433.26 178.151  49
   2  -7   1 6275.32 323.608   3
   2  -7   1 6328.15 181.780   5
   2  -7   1 6089.31 169.360  34
   2  -7   1 6206.88 181.273  38
   2  -7   1 6348.10 167.926  20
   2  -7   1 6670.51 361.157  23
   2  -7   1 6318.70 182.480  22
   2  -7   1 6123.45 164.217  39
   2  -7   1 6486.19 190.736  24
   2  -7   2 87.3356 21.6887  22
   2  -7   2 105.958 21.0738  34
   2  -7   2 69.6533 17.1891  32
   2  -7   2 57.7466 20.5753  21
   2  -7   2 104.380 19.9150  33
   2  -7   2-37.8147 59.3473   3
   2  -7   2 137.276 27.8291   5
   2  -7   2 77.0975 17.1243  30
   2  -7   2 91.6428 24.7303  24
   2  -7   2 98.2272 24.6105  38
   2  -7   2 84.7355 23.5757  42
   2  -7   2 256.181 26.5086  39
   2  -7   2 120.009 23.4630  41
   2  -7   2 67.7087 17.5679  20
   2  -7   3 4109.94 146.540  12
   2  -7   3 4153.04 129.000  39
   2  -7   3 4322.36 140.473  41
   2  -7   3 4459.05 148.299  24
   2  -7   3 4376.86 268.376   3
   2  -7   3 4315.56 132.390  30
   2  -7   3 4459.42 142.883  21
   2  -7   3 4293.60 144.115   5
   2  -7   3 4550.33 135.048  34
   2  -7   3 4145.02 137.149  32
   2  -7   3 4453.23 139.088  42
   2  -7   3 4283.41 131.185  33
   2  -7   3 4423.17 143.388  38
   2  -7   4 3074.82 100.113  36
   2  -7   4 3131.38 111.986  42
   2  -7   4 3057.91 111.996  32
   2  -7   4 3188.56 109.532  30
   2  -7   4 3106.04 117.909  24
   2  -7   4 3148.64 118.569   5
   2  -7   4 3105.23 120.481  12
   2  -7   4 3098.88 106.823  33
   2  -7   4 3011.40 114.157  21
   2  -7   4 3140.63 109.204  34
   2  -7   4 2997.94 105.032  39
   2  -7   4 3284.40 119.344  38
   2  -7   4 3506.94 236.945   3
   2  -7   5 8573.94 227.151  38
   2  -7   5 8167.56 380.484   3
   2  -7   5 8399.74 218.305  30
   2  -7   5 8520.86 226.980  24
   2  -7   5 8062.79 206.728  36
   2  -7   5 8135.48 222.608  21
   2  -7   5 8484.55 218.692  42
   2  -7   5 8146.45 213.623  33
   2  -7   5 8301.94 228.299  12
   2  -7   5 8121.51 218.923  32
   2  -7   5 8628.91 218.192  34
   2  -7   5 8008.77 211.381  39
   2  -7   5 8049.92 225.313   5
   2  -7   6 8112.32 208.135  36
   2  -7   6 8584.66 221.027  30
   2  -7   6 7896.84 214.405  32
   2  -7   6 8073.74 210.483  39
   2  -7   6 7964.93 221.259   5
   2  -7   6 7988.99 222.840  12
   2  -7   6 7746.81 370.831   3
   2  -7   6 8203.74 215.293  33
   2  -7   6 7946.23 212.176  42
   2  -7   6 8183.11 214.998  34
   2  -7   6 7870.11 217.586  21
   2  -7   6 8180.88 219.194  24
   2  -7   7 21163.9 472.931  30
   2  -7   7 21371.5 467.648  34
   2  -7   7 21348.6 481.446  17
   2  -7   7 20751.6 463.762  32
   2  -7   7 20989.0 465.045  33
   2  -7   7 21548.3 462.018  39
   2  -7   7 21246.7 461.072  36
   2  -7   8 46.3962 22.7406  36
   2  -7   8 82.2999 28.5489  30
   2  -7   8 71.0508 17.0559  35
   2  -7   8 89.2107 23.6436  39
   2  -7   8 98.7736 24.7365  33
   2  -7   8 91.4013 29.0821  17
   2  -7   8 65.6485 26.1328  34
   2  -7   8 114.754 21.7298  32
   2  -7   9 21334.9 469.316  36
   2  -7   9 21867.9 473.822  34
   2  -7   9 21194.7 480.397  30
   2  -7   9 21246.3 454.766  35
   2  -7   9 20954.2 459.795  32
   2  -7   9 21275.6 470.425  33
   2  -7   9 21249.4 465.505  39
   2  -7   9 21457.7 486.375  17
   2  -7  10 1438.13 74.9630  36
   2  -7  10 1388.14 75.6403  34
   2  -7  10 1414.29 65.6269  35
   2  -7  10 1484.82 80.2918  30
   2  -7  10 1505.44 74.4477  33
   2  -7  10 1424.43 70.6262  39
   2  -7  10 1430.06 80.5660  17
   2  -7  11 419.904 35.4632  35
   2  -7  11 392.721 43.4559  17
   2  -7  11 405.321 44.6990  30
   2  -7  11 467.299 44.4447  34
   2  -7  11 421.200 40.2035  33
   2  -7  11 434.318 39.3733  39
   2  -7  11 393.560 41.4944  36
   2  -7  12 1747.77 86.8728  30
   2  -7  12 1824.22 78.6792  33
   2  -7  12 1704.03 80.3597  34
   2  -7  12 1839.14 77.5506  39
   2  -7  13 833.747 51.9948  34
   2  -7  13 884.605 47.0397  29
   2  -7  13 787.839 53.3107  30
   2  -7  13 813.203 48.7269  39
   2  -7  14 2908.42 96.8925  34
   2  -7  14 2943.39 90.6029  29
   2  -7  14 2920.49 93.1228  39
   2  -7  14 2818.51 100.215  30
   2  -7  14 3011.94 101.188  20
   2  -7  15 135.877 21.7745  30
   2  -7  15 136.697 20.0821  34
   2  -7  15 136.624 16.6864  29
   2  -7  15 111.147 15.0047  39
   2  -7  15 146.430 21.2388  20
   2  -6 -18 234.672 26.5365  25
   2  -6 -18 253.823 27.4314  26
   2  -6 -18 182.386 21.3024  32
   2  -6 -17 1172.30 59.4744  32
   2  -6 -17 1270.40 64.2157   2
  -2   6  17 1176.19 52.6491  13
   2  -6 -17 1212.19 66.3211  25
   2  -6 -17 1143.20 62.0157  26
  -2   6  16 1723.67 72.3972  13
   2  -6 -16 1721.14 80.3801  32
   2  -6 -16 1518.09 81.1440  25
   2  -6 -16 1750.38 81.0918   2
   2  -6 -15 8137.18 241.059  25
   2  -6 -15 8725.82 237.268   2
   2  -6 -15 8700.19 237.956  32
   2  -6 -15 8775.04 227.289  38
  -2   6  15 9098.77 225.612  13
   2  -6 -14 170.901 35.0171  32
   2  -6 -14 176.770 29.3521  38
  -2   6  14 112.084 24.5407  13
   2  -6 -14 144.508 35.8655  25
   2  -6 -14 198.328 36.2975   2
   2  -6 -13 7916.86 419.915   1
   2  -6 -13 7209.32 215.132  38
   2  -6 -13 7554.19 215.825   2
  -2   6  13 7895.37 209.171  13
   2  -6 -12 7838.49 410.844   1
   2  -6 -12 7342.21 210.332   2
   2  -6 -12 7481.99 218.624  38
   2  -6 -11 4397.59 294.514   1
   2  -6 -11 4591.76 148.056   2
   2  -6 -11 4339.89 153.612  38
   2  -6 -11 4579.46 151.136  41
   2  -6 -10 1238.69 67.4928   2
   2  -6 -10 1270.79 72.8051  41
   2  -6 -10 1241.43 75.0494  38
   2  -6 -10 1352.23 156.119   1
   2  -6  -9 175.777 66.0126   1
   2  -6  -9 95.7074 24.2089   2
   2  -6  -9 96.0156 24.4263  41
   2  -6  -9 71.3040 23.5623  38
   2  -6  -9 72.1629 42.2380   3
   2  -6  -9 86.7358 16.6554  42
   2  -6  -8 649.411 44.3834   5
   2  -6  -8 693.949 49.9814  24
   2  -6  -8 712.596 46.0659  42
   2  -6  -8 809.517 109.182   1
   2  -6  -8 803.857 47.8935   2
   2  -6  -8 670.884 52.3243  38
   2  -6  -8 763.431 57.6997  22
   2  -6  -8 791.214 102.886   3
   2  -6  -8 687.059 44.7847  21
   2  -6  -8 680.649 52.7795  41
   2  -6  -7 897.247 49.4486   2
   2  -6  -7 893.040 52.6147   5
   2  -6  -7 837.155 55.2567  24
   2  -6  -7 874.661 58.6901  41
   2  -6  -7 769.435 53.1797  32
   2  -6  -7 1078.97 119.109   1
   2  -6  -7 909.643 51.4755  42
   2  -6  -7 879.287 50.2920  21
   2  -6  -7 948.643 111.486   3
   2  -6  -7 848.247 60.0061  22
   2  -6  -7 771.608 54.5900  38
   2  -6  -6 14995.6 337.797   5
   2  -6  -6 15195.6 495.490   1
   2  -6  -6 15224.3 336.060  42
   2  -6  -6 13923.2 341.723  32
   2  -6  -6 15281.9 355.080  41
   2  -6  -6 15118.6 335.807  21
   2  -6  -6 15196.4 511.788   3
   2  -6  -6 15253.6 358.879  22
   2  -6  -6 15459.3 326.970   2
   2  -6  -6 15285.4 353.517  24
   2  -6  -6 14528.9 340.356  25
   2  -6  -6 13295.6 331.658  34
   2  -6  -6 15294.3 336.722  49
   2  -6  -6 14743.0 348.479  38
   2  -6  -5 367.087 68.8550   1
   2  -6  -5 287.265 34.5530  22
   2  -6  -5 307.476 32.9358  24
   2  -6  -5 312.355 30.3956   5
   2  -6  -5 325.684 31.1618  42
   2  -6  -5 338.351 75.0142   3
   2  -6  -5 389.311 33.4786  49
   2  -6  -5 275.436 28.7580  25
   2  -6  -5 306.086 32.4307  32
   2  -6  -5 340.672 31.0691  21
   2  -6  -5 304.840 32.4592  19
   2  -6  -5 355.902 27.4495   2
   2  -6  -5 354.195 36.2048  38
   2  -6  -5 378.953 37.1290  41
   2  -6  -4 1143.69 61.8951  19
   2  -6  -4 1288.76 67.3526  41
   2  -6  -4 1785.27 70.2077  42
   2  -6  -4 1246.11 63.3141  32
   2  -6  -4 1772.39 149.613   3
   2  -6  -4 1348.23 114.421   1
   2  -6  -4 1320.19 62.1918  49
   2  -6  -4 1252.35 61.5681   5
   2  -6  -4 1277.38 61.1301  21
   2  -6  -4 1172.82 66.0800  22
   2  -6  -4 1225.76 67.0510  24
   2  -6  -4 1222.43 51.6092   2
   2  -6  -4 1350.27 148.017  23
   2  -6  -4 1382.00 67.5501  38
   2  -6  -3 26240.6 740.267   3
   2  -6  -3 27328.5 553.647  21
   2  -6  -3 26644.5 566.291  24
   2  -6  -3 25769.2 553.534  32
   2  -6  -3 24998.3 555.748  38
   2  -6  -3 26298.4 787.751  23
   2  -6  -3 27353.3 529.016   2
   2  -6  -3 28061.7 679.614   1
   2  -6  -3 24938.6 547.859  42
   2  -6  -3 27685.3 569.989  22
   2  -6  -3 26123.9 550.499  49
   2  -6  -3 26408.1 553.525   5
   2  -6  -3 26475.2 564.098  41
   2  -6  -2 43532.1 959.760   1
   2  -6  -2 42554.3 850.663  21
   2  -6  -2 42278.5 864.334  24
   2  -6  -2 44329.0 854.775   5
   2  -6  -2 43061.4 1058.86   3
   2  -6  -2 40438.8 845.851  42
   2  -6  -2 40556.0 852.941  38
   2  -6  -2 42170.7 1105.79  23
   2  -6  -2 42553.5 849.335  49
   2  -6  -2 44743.0 864.426  41
   2  -6  -1 17567.3 403.321   5
   2  -6  -1 19396.3 405.841  49
   2  -6  -1 18793.6 578.328   3
   2  -6  -1 18545.5 416.476  24
   2  -6  -1 19009.0 403.659  42
   2  -6  -1 18564.5 478.612   1
   2  -6  -1 18474.9 404.045  21
   2  -6  -1 19669.3 631.457  23
   2  -6  -1 18601.5 409.440  38
   2  -6   0 5121.42 148.148  21
   2  -6   0 4944.48 148.671   5
   2  -6   0 5226.88 146.915  42
   2  -6   0 4903.93 259.337   3
   2  -6   0 5296.25 147.122  49
   2  -6   0 5334.83 151.921  38
   2  -6   0 5249.69 185.764   1
   2  -6   0 5466.81 159.184  24
   2  -6   0 5458.79 292.745  23
   2  -6   1 41170.3 824.460  37
   2  -6   1 42233.9 827.165  21
   2  -6   1 43202.4 1086.68  23
   2  -6   1 39647.5 820.495  42
   2  -6   1 41736.9 829.281  38
   2  -6   1 42834.2 1035.71   3
   2  -6   1 44063.5 841.578  24
   2  -6   1 38871.0 819.755  49
   2  -6   1 40961.5 828.627   5
   2  -6   2 83937.6 1639.56  21
   2  -6   2 88760.2 1873.41   3
   2  -6   2 85732.7 1641.56  38
   2  -6   2 83055.7 1636.30  32
   2  -6   2 84935.1 1911.20  23
   2  -6   2 87071.9 1629.29  34
   2  -6   2 82288.9 1634.18  49
   2  -6   2 81969.1 1633.54  42
   2  -6   2 86168.2 1650.82  24
   2  -6   2 88128.1 1644.32   5
   2  -6   3 2112.58 89.2568  12
   2  -6   3 2137.36 85.0952  41
   2  -6   3 2326.64 91.7556  24
   2  -6   3 2212.39 83.5568  49
   2  -6   3 2219.92 81.8222  30
   2  -6   3 2207.71 87.7121   5
   2  -6   3 2206.67 83.2919  42
   2  -6   3 2136.29 84.7599  21
   2  -6   3 2064.07 164.009   3
   2  -6   3 2225.75 82.8982  33
   2  -6   3 2148.61 84.4202  32
   2  -6   3 2295.60 88.5448  38
   2  -6   3 2328.40 82.4079  34
   2  -6   4 379.021 33.4467  42
   2  -6   4 316.609 30.7714  33
   2  -6   4 323.642 34.0170   5
   2  -6   4 389.285 75.5757   3
   2  -6   4 362.565 35.9484  24
   2  -6   4 329.153 31.1986  49
   2  -6   4 320.952 29.3681  39
   2  -6   4 370.512 33.5048  30
   2  -6   4 368.265 32.2851  34
   2  -6   4 353.011 34.4526  12
   2  -6   4 359.521 34.2131  38
   2  -6   4 328.676 32.2758  32
   2  -6   4 459.312 32.1469  36
   2  -6   4 361.187 34.6764  21
   2  -6   5 64.8017 19.6671  32
   2  -6   5 40.7777 16.2211  21
   2  -6   5 78.6713 20.7566  42
   2  -6   5 139.050 23.7419  33
   2  -6   5 71.3747 17.7530  39
   2  -6   5 53.4710 20.0237   5
   2  -6   5 14.8355 40.1633   3
   2  -6   5 72.0506 18.7123  24
   2  -6   5 66.2183 17.8787  12
   2  -6   5 70.5428 18.7142  34
   2  -6   5 55.0609 17.9652  38
   2  -6   5 75.1565 17.9612  36
   2  -6   5 69.4122 18.8643  30
   2  -6   6 28716.3 583.205  34
   2  -6   6 27031.4 583.393  32
   2  -6   6 27839.9 578.175  42
   2  -6   6 28682.5 589.157  30
   2  -6   6 27606.0 569.480  35
   2  -6   6 28530.5 580.023  36
   2  -6   6 27927.9 587.573  33
   2  -6   6 28303.3 577.461  39
   2  -6   6 27169.3 774.546   3
   2  -6   6 27339.0 584.131  21
   2  -6   6 27227.5 584.762  24
   2  -6   7 447.400 38.0597  36
   2  -6   7 399.086 33.9283  35
   2  -6   7 460.233 40.9939  33
   2  -6   7 364.823 36.4972  32
   2  -6   7 382.765 40.2542  30
   2  -6   7 430.427 40.3414  34
   2  -6   7 408.444 34.5015  42
   2  -6   7 337.836 71.1601   3
   2  -6   8 263.287 33.4731  36
   2  -6   8 209.533 32.1463  34
   2  -6   8 146.680 28.4567  33
   2  -6   8 190.970 26.1310  39
   2  -6   8 204.356 28.3275  32
   2  -6   8 244.598 36.7223  17
   2  -6   8 151.483 25.5021  35
   2  -6   8 261.601 36.0077  30
   2  -6   9 396.575 38.1366  32
   2  -6   9 359.353 36.6069  35
   2  -6   9 369.984 40.5081  36
   2  -6   9 352.001 40.6001  33
   2  -6   9 329.013 42.0067  17
   2  -6   9 389.537 40.5954  34
   2  -6   9 366.911 43.0331  30
   2  -6   9 314.837 34.3266  39
   2  -6  10 19295.4 459.505  17
   2  -6  10 20559.5 452.040  36
   2  -6  10 20125.9 439.497  35
   2  -6  10 19782.9 449.239  34
   2  -6  10 20763.7 458.768  33
   2  -6  10 20951.1 444.583  39
   2  -6  10 19067.2 456.321  30
   2  -6  10 19988.1 431.920   6
   2  -6  11 354.806 35.9631  35
   2  -6  11 383.597 42.0222  33
   2  -6  11 368.881 43.1120  34
   2  -6  11 339.932 44.6367  30
   2  -6  11 345.366 33.7618   6
   2  -6  11 302.403 38.0275  17
   2  -6  11 375.010 42.1307  36
   2  -6  11 324.351 35.7570  39
   2  -6  12 1807.79 79.5506  35
   2  -6  12 1751.38 91.1591  30
   2  -6  12 1790.77 84.4715  34
   2  -6  12 1662.22 71.3082   6
   2  -6  12 1772.88 85.7316  36
   2  -6  12 1777.20 86.3725  33
   2  -6  12 1815.21 79.9127  39
   2  -6  13 1398.25 73.5998  33
   2  -6  13 1287.03 75.6695  30
   2  -6  13 1362.79 65.6723  35
   2  -6  13 1344.82 71.6533  34
   2  -6  13 1383.28 68.3300  39
   2  -6  13 1445.65 62.9364   6
   2  -6  13 1363.65 74.2402  36
   2  -6  14 6335.87 187.305  30
   2  -6  14 6630.48 179.548  34
   2  -6  14 6659.78 176.047  39
   2  -6  15 322.259 32.5224  34
   2  -6  15 252.519 32.0377  30
   2  -6  15 256.512 27.6878  39
   2  -6  16 89.5098 19.2905  30
   2  -6  16 124.069 19.3584  34
   2  -6  16 103.488 18.0857  29
   2  -6  16 59.6733 17.3982  20
   2  -6  16 80.6045 15.9758  39
   2  -5 -18 3976.06 123.913  25
   2  -5 -18 3827.18 113.441  32
   2  -5 -18 4029.22 124.063  26
  -2   5  18 4052.23 117.253  13
   2  -5 -17 1239.80 63.0746  32
  -2   5  17 1350.50 65.4706  13
   2  -5 -17 1216.62 68.8011  25
   2  -5 -17 1366.95 70.1640   2
   2  -5 -16 2347.22 97.0617  32
   2  -5 -16 2281.59 99.3380   2
   2  -5 -16 2221.21 101.809  25
  -2   5  16 2416.15 97.0387  13
   2  -5 -15 5707.73 179.087   2
  -2   5  15 5766.33 174.402  13
   2  -5 -15 6009.79 363.356   1
   2  -5 -14 8095.10 228.373   2
  -2   5  14 7786.02 221.083  13
   2  -5 -14 8017.47 428.843   1
   2  -5 -14 8185.01 219.710  38
  -2   5  13 200.614 31.5240  13
   2  -5 -13 238.975 33.9179  38
   2  -5 -13 286.944 42.5473   2
   2  -5 -12 13257.2 546.216   1
   2  -5 -12 13169.0 313.040   2
  -2   5  12 12045.2 303.800  13
   2  -5 -12 12754.5 312.451   9
   2  -5 -12 11969.9 308.290  38
   2  -5 -11 4995.46 163.679  38
  -2   5  11 5283.84 159.072  13
   2  -5 -11 4924.54 307.731   1
   2  -5 -11 5194.29 161.314   2
   2  -5 -11 5311.11 163.285   9
   2  -5 -10 16435.9 377.613   9
  -2   5  10 16416.7 371.583  13
   2  -5 -10 16792.5 375.721   2
   2  -5 -10 16086.3 382.230  38
   2  -5 -10 17084.9 598.788   1
   2  -5  -9 13725.7 306.489   2
   2  -5  -9 13429.8 436.905   3
   2  -5  -9 13017.8 490.762   1
   2  -5  -9 12693.9 305.740   9
   2  -5  -9 13149.9 312.089  41
   2  -5  -9 12494.5 312.507  38
   2  -5  -8 7662.98 309.193   3
   2  -5  -8 7280.34 200.765  41
   2  -5  -8 7689.78 192.408   2
   2  -5  -8 7396.73 207.215  22
   2  -5  -8 7140.40 331.655   1
   2  -5  -8 7766.37 186.649  42
   2  -5  -8 6904.84 198.868  38
   2  -5  -7 1094.71 60.4046  38
   2  -5  -7 1306.05 57.9676   2
   2  -5  -7 1233.39 55.8173  42
   2  -5  -7 1119.83 110.537   3
   2  -5  -7 1220.32 63.2322  41
   2  -5  -7 1227.22 65.3785  22
   2  -5  -7 1211.78 55.4061  49
   2  -5  -7 1154.48 119.377   1
   2  -5  -6 823.503 44.4514  42
   2  -5  -6 677.300 85.5282   3
   2  -5  -6 849.005 43.6146   2
   2  -5  -6 804.232 44.1088  49
   2  -5  -6 860.515 101.756   1
   2  -5  -5 31511.0 764.534   1
   2  -5  -5 30849.6 771.093   3
   2  -5  -5 29846.1 600.417  49
   2  -5  -5 30132.0 593.056   2
   2  -5  -4 9502.28 329.361   1
   2  -5  -4 9078.38 345.626   4
   2  -5  -4 9652.05 351.701   3
   2  -5  -4 9597.07 224.270  49
   2  -5  -4 9486.10 376.708  23
   2  -5  -4 9653.61 224.039  42
   2  -5  -4 9638.20 215.141   2
   2  -5  -3 1002.41 48.6903  49
   2  -5  -3 826.957 95.7354   3
   2  -5  -3 1021.10 42.2077   2
   2  -5  -3 996.498 112.900  23
   2  -5  -3 1049.53 49.4727  42
   2  -5  -3 972.281 87.4721   1
   2  -5  -3 1001.21 104.483   4
   2  -5  -2 48335.6 1097.30   4
   2  -5  -2 47378.8 1019.64   1
   2  -5  -2 46013.1 1083.57   3
   2  -5  -2 47111.7 912.758  49
   2  -5  -2 45341.4 910.278  42
   2  -5  -2 46617.3 893.612   2
   2  -5  -2 45384.6 1117.49  23
   2  -5  -1 64682.3 1433.34  23
   2  -5  -1 61068.4 1207.02  49
   2  -5  -1 62343.8 1207.69  42
   2  -5  -1 64513.6 1302.94   1
   2  -5  -1 63329.8 1400.04   4
   2  -5  -1 64907.7 1396.24   3
   2  -5   0 1314.07 126.582  23
   2  -5   0 1395.08 57.9708  49
   2  -5   0 1211.07 113.728   3
   2  -5   0 1382.63 57.7034  42
   2  -5   0 1299.80 118.995   4
   2  -5   0 1378.46 85.5456   1
   2  -5   1 9449.66 357.459   4
   2  -5   1 10028.0 274.574   1
   2  -5   1 10549.2 235.698  42
   2  -5   1 10383.0 387.799  23
   2  -5   1 10510.5 236.336  49
   2  -5   2 1730.10 132.818   3
   2  -5   2 1547.80 62.4549  49
   2  -5   2 1401.39 124.770   4
   2  -5   2 1608.81 62.6698  42
   2  -5   2 1434.54 131.428  23
   2  -5   3 48597.1 936.974  42
   2  -5   3 49859.4 1117.82   3
   2  -5   3 46654.3 936.453  49
   2  -5   4 1160.90 53.1784  49
   2  -5   4 1127.79 51.8675  42
   2  -5   4 1112.05 109.751   3
   2  -5   5 218.236 23.1437  34
   2  -5   5 230.052 26.7839  33
   2  -5   5 340.717 31.2042  30
   2  -5   5 275.370 25.8344  49
   2  -5   5 258.126 58.2656   3
   2  -5   5 236.155 23.6886  42
   2  -5   6 3583.94 110.845  36
   2  -5   6 3567.34 106.372  42
   2  -5   6 3554.18 117.297  33
   2  -5   6 3613.50 115.614  30
   2  -5   6 3436.27 194.268   3
   2  -5   6 3373.93 110.402  32
   2  -5   6 3453.29 110.884  34
   2  -5   6 3484.24 112.683  38
   2  -5   7 45214.2 910.330  33
   2  -5   7 44879.8 889.793   7
   2  -5   7 44220.6 898.807  34
   2  -5   7 45394.1 900.342  36
   2  -5   7 46169.9 906.813  30
   2  -5   7 45408.6 1069.41   3
   2  -5   7 44871.9 899.845  32
   2  -5   8 788.872 54.9932  17
   2  -5   8 757.491 49.4270  36
   2  -5   8 691.084 46.2927  32
   2  -5   8 735.990 44.5780   7
   2  -5   8 859.728 55.3890  33
   2  -5   8 768.379 50.7635  34
   2  -5   8 709.211 45.1712  35
   2  -5   8 819.774 54.1868  30
   2  -5   8 760.931 43.2766   6
   2  -5   9 17188.2 388.672  34
   2  -5   9 17346.9 387.045  32
   2  -5   9 17109.6 378.739   7
   2  -5   9 17294.9 399.515  33
   2  -5   9 16878.2 387.430  36
   2  -5   9 16805.8 399.956  17
   2  -5   9 16820.9 394.430  30
   2  -5   9 17433.5 383.691  35
   2  -5   9 17403.9 376.154   6
   2  -5  10 44.5398 21.5936  35
   2  -5  10-5.95636 16.6290   6
   2  -5  10 33.7019 25.0711  30
   2  -5  10 28.1690 21.5232  36
   2  -5  10 1.11278 19.1268  17
   2  -5  10 7.83544 24.8489  33
   2  -5  11 15728.3 367.533  34
   2  -5  11 14430.1 372.422  30
   2  -5  11 16739.8 383.572  33
   2  -5  11 15534.8 354.154   6
   2  -5  11 15619.3 361.747  35
   2  -5  11 15583.5 368.798  36
   2  -5  11 16289.1 374.507  17
   2  -5  12 2538.41 106.611  36
   2  -5  12 2450.61 100.169  35
   2  -5  12 2693.34 113.673  33
   2  -5  12 2544.38 112.562  30
   2  -5  12 2519.80 105.410  34
   2  -5  12 2522.32 95.3676   6
   2  -5  13 7989.60 220.615  36
   2  -5  13 7658.20 210.461  35
   2  -5  13 8033.33 205.152   6
   2  -5  13 8257.26 228.362  33
   2  -5  13 7614.66 214.862  34
   2  -5  13 7444.54 224.776  30
   2  -5  14 1495.70 80.9665  36
   2  -5  14 1571.04 70.4439   6
   2  -5  14 1569.79 86.1966  30
   2  -5  14 1631.46 78.6528  34
   2  -5  14 1508.34 74.1424  35
   2  -5  15 10473.0 247.257  39
   2  -5  15 10035.9 249.235  34
   2  -5  15 10191.2 263.088  30
   2  -5  15 9892.27 238.686   6
   2  -5  16 11.3180 16.5471  39
   2  -5  16 16.7833 19.2549  34
   2  -5  16 20.0139 13.5506   6
   2  -5  16 27.7819 19.8826  30
   2  -5  17 773.577 40.8695  34
   2  -5  17 785.190 43.0945  30
   2  -5  17 860.334 42.7581  39
   2  -4 -19 493.144 31.3999  25
   2  -4 -19 473.733 35.1914  26
  -2   4  19 474.012 33.1258  13
   2  -4 -18 54.1308 13.9883  32
   2  -4 -18 84.8340 21.5473  25
  -2   4  18 63.5136 21.3948  13
   2  -4 -18 78.2274 19.6553   2
  -2   4  17 5895.44 172.205  13
   2  -4 -17 5931.84 163.937  32
  -2   4  17 5762.15 157.374   6
   2  -4 -17 5791.67 173.035   2
   2  -4 -17 5762.51 171.849  25
   2  -4 -16 12368.4 310.413  25
   2  -4 -16 11981.6 307.539   2
  -2   4  16 12731.9 308.836  13
   2  -4 -15 407.279 92.5936   1
   2  -4 -15 480.191 50.2913   2
  -2   4  15 470.428 47.2175  13
  -2   4  14 1609.67 84.4524  13
   2  -4 -14 1511.94 83.4465   2
   2  -4 -14 1498.71 179.619   1
   2  -4 -14 1588.70 87.2621   9
   2  -4 -13 8025.63 419.791   1
   2  -4 -13 7903.38 224.081   2
   2  -4 -13 8008.19 228.981   9
  -2   4  13 7839.32 220.845  13
   2  -4 -12 12849.0 319.402   2
  -2   4  12 13151.8 318.297  13
   2  -4 -12 13243.1 543.087   1
   2  -4 -12 13163.8 325.001   9
   2  -4 -12 13007.3 314.857  38
   2  -4 -11 44.0779 18.1499  38
   2  -4 -11 40.4244 57.8232   1
  -2   4  11 51.4017 19.4490  13
   2  -4 -11 70.7466 26.6185   2
   2  -4 -11 36.3530 18.3081   9
   2  -4 -10 2128.20 89.9863   9
   2  -4 -10 2049.70 183.272   1
   2  -4 -10 2363.20 92.1020   2
   2  -4 -10 2119.37 87.9540  38
  -2   4  10 2274.87 88.9865  13
   2  -4  -9 9488.01 225.032   2
   2  -4  -9 8717.67 224.618   9
   2  -4  -9 8603.66 376.927   1
  -2   4   9 8800.12 219.127  13
   2  -4  -9 8510.78 223.086  38
   2  -4  -8 61288.5 1403.58   1
   2  -4  -8 64128.0 1325.74   3
   2  -4  -8 59635.3 1183.36   2
   2  -4  -7 943.393 87.7436   3
   2  -4  -7 964.238 48.2984   2
   2  -4  -7 871.166 41.5759  42
   2  -4  -7 843.226 41.0894  49
   2  -4  -7 981.519 106.808   1
   2  -4  -6 59.7701 30.0023   4
   2  -4  -6 45.3871 10.6824  49
   2  -4  -6-4.61307 24.7091   3
   2  -4  -6 73.0533 15.1789   2
   2  -4  -6 72.6559 38.2436   1
   2  -4  -6 50.8743 12.1277  42
   2  -4  -5 35966.4 853.044   4
   2  -4  -5 37163.8 857.310   3
   2  -4  -5 38617.8 876.665   1
   2  -4  -5 35915.7 715.634  42
   2  -4  -5 37071.4 716.605   2
   2  -4  -5 35867.4 716.465  49
   2  -4  -4 64673.5 1348.43   4
   2  -4  -4 61833.5 1190.91  42
   2  -4  -4 61443.3 1333.75   3
   2  -4  -4 65386.0 1338.33   1
   2  -4  -4 61179.1 1190.73  49
   2  -4  -3 2016.02 141.624  23
   2  -4  -3 2155.11 70.9157  49
   2  -4  -3 2114.18 123.029   1
   2  -4  -3 1971.35 131.499   4
   2  -4  -3 2192.71 70.5696  42
   2  -4  -3 2093.23 132.484   3
   2  -4  -2 1453.56 108.307   3
   2  -4  -2 1551.43 99.0639   1
   2  -4  -2 1390.67 110.092   4
   2  -4  -2 1469.68 55.3880  42
   2  -4  -2 1338.92 112.743  23
   2  -4  -2 1430.10 55.0361  49
   2  -4  -1 11.9053 33.2278  23
   2  -4  -1 1.26609 27.7260   4
   2  -4  -1 53.8627 11.7124  42
   2  -4  -1 27.9925 20.1702   1
   2  -4  -1 68.7971 36.4527   3
   2  -4  -1 3.79976 8.93565  49
   2  -4   0 24432.1 483.461  49
   2  -4   0 22267.8 607.612   4
   2  -4   0 23887.3 609.142   3
   2  -4   0 23873.8 482.703  42
   2  -4   0 23531.8 546.222   1
   2  -4   0 23652.0 630.600  23
   2  -4   1 423.004 27.4547  49
   2  -4   1 428.982 65.5704   4
   2  -4   1 378.520 40.0710   1
   2  -4   1 341.828 59.5796  23
   2  -4   1 429.118 61.8543   3
   2  -4   1 400.852 27.0755  42
   2  -4   2 25787.7 674.192   4
   2  -4   2 27982.4 587.961   1
   2  -4   2 27624.0 699.337  23
   2  -4   2 27224.4 543.450  42
   2  -4   2 27554.4 675.698   3
   2  -4   2 26817.1 543.390  49
   2  -4   3 3570.08 183.342   4
   2  -4   3 3688.08 122.436   1
   2  -4   3 3870.43 184.009   3
   2  -4   3 3754.83 102.951  42
   2  -4   3 3812.11 103.524  49
   2  -4   4 21587.5 435.252  49
   2  -4   4 20976.6 433.579  42
   2  -4   4 20420.3 564.630   4
   2  -4   4 21983.5 564.912   3
   2  -4   5 9398.65 338.960  47
   2  -4   5 9139.19 209.741  42
   2  -4   5 9521.06 317.018   3
   2  -4   5 9352.82 210.589  49
   2  -4   6 2041.07 69.6007  42
   2  -4   6 2125.36 70.5790  49
   2  -4   6 2334.70 159.306  47
   2  -4   6 2120.29 133.549   3
   2  -4   7 1377.65 130.359  47
   2  -4   7 1455.75 68.7610  33
   2  -4   7 1457.13 66.2905  30
   2  -4   7 1498.93 64.2130  36
   2  -4   7 1654.82 116.337   3
   2  -4   8 749.731 44.6633   7
   2  -4   8 771.396 50.9857  33
   2  -4   8 742.676 103.280  47
   2  -4   8 747.577 44.9197  32
   2  -4   8 830.772 48.2712  36
   2  -4   8 771.870 49.7087  30
   2  -4   9 1753.03 80.3572  17
   2  -4   9 1727.36 162.142  47
   2  -4   9 1792.16 75.2658   7
   2  -4   9 1839.47 78.1831  36
   2  -4   9 1800.55 82.1445  30
   2  -4   9 1956.48 85.9525  33
   2  -4   9 1667.18 73.3684  32
   2  -4  10 31479.2 659.399  17
   2  -4  10 31354.5 654.270  35
   2  -4  10 32771.5 673.141  33
   2  -4  10 31212.3 658.001  36
   2  -4  10 30702.2 665.065  30
   2  -4  10 29447.4 886.916  47
   2  -4  10 32098.1 655.234   7
   2  -4  11 1170.54 68.2342  36
   2  -4  11 1204.63 66.8713  35
   2  -4  11 1264.90 74.7116  33
   2  -4  11 1284.61 66.5033   7
   2  -4  11 1251.31 73.2130  30
   2  -4  11 1130.07 140.801  47
   2  -4  11 1040.04 60.7385  17
   2  -4  12 863.768 57.4454   7
   2  -4  12 701.928 57.6816  36
   2  -4  12 840.462 64.9872  33
   2  -4  12 808.845 56.8238  35
   2  -4  12 821.041 63.2764  30
   2  -4  12 811.713 124.093  47
   2  -4  13 955.139 65.3203  36
   2  -4  13 1067.04 67.1717  34
   2  -4  13 945.218 61.9607  35
   2  -4  13 1037.75 61.1190   6
   2  -4  13 1089.25 72.3087  33
   2  -4  13 915.312 67.6028  30
   2  -4  13 886.156 136.151  47
   2  -4  14 30274.7 659.989  35
   2  -4  14 31806.6 673.116  36
   2  -4  14 31039.3 679.554  30
   2  -4  14 31116.6 664.291  34
   2  -4  14 32664.4 658.131   6
   2  -4  15 28.3764 28.5364  30
   2  -4  15-2.74114 25.2924  34
   2  -4  15 9.28144 24.9747  35
   2  -4  15 39.6343 21.3549   6
   2  -4  16 809.606 48.7773   6
   2  -4  16 859.135 55.8202  30
   2  -4  16 824.308 52.3723  34
   2  -4  17 1077.72 51.7354   6
   2  -4  17 1087.77 54.3474  34
   2  -4  17 1109.94 56.4109  30
   2  -4  18 5286.97 131.797   6
   2  -4  18 4982.53 126.015  30
   2  -4  18 5240.91 134.213  34
   2  -3 -19 9919.46 225.851  26
   2  -3 -19 9662.81 210.593  25
  -2   3  19 9118.48 209.791   6
  -2   3  19 9677.51 228.006  13
  -2   3  18 181.098 29.4099  13
  -2   3  18 184.498 22.8195   6
   2  -3 -18 179.394 23.7659  25
   2  -3 -17 5799.07 158.224  32
  -2   3  17 5755.73 173.759  13
   2  -3 -17 5902.11 175.509   2
  -2   3  17 5829.15 164.340   6
   2  -3 -17 5852.48 168.560  25
   2  -3 -16 209.301 34.9024   2
  -2   3  16 265.764 39.6865  13
   2  -3 -15 3121.41 124.251   2
  -2   3  15 3231.36 125.058  13
   2  -3 -15 3159.72 262.784   1
   2  -3 -15 3253.29 130.995   9
  -2   3  14 489.362 48.5760  13
   2  -3 -14 495.311 108.914   1
   2  -3 -14 422.634 49.4928   9
   2  -3 -14 442.774 46.7544   2
  -2   3  13 59.4142 22.1819  13
   2  -3 -13 65.6414 28.3865   2
   2  -3 -13 79.5482 31.5848   9
   2  -3 -12 7366.86 204.186   2
  -2   3  12 7032.26 200.696  13
   2  -3 -12 7515.96 210.857   9
   2  -3 -11 27600.2 601.751   2
  -2   3  11 29290.3 603.776  13
   2  -3 -11 29339.7 609.536   9
   2  -3 -11 28892.4 850.868   1
  -2   3  10 9374.86 238.920  13
   2  -3 -10 9915.22 242.802   2
   2  -3 -10 9706.54 243.952   9
   2  -3 -10 9936.61 409.767   1
   2  -3  -9 43719.9 892.482   2
   2  -3  -9 45212.1 1115.21   1
   2  -3  -9 45956.0 899.224   9
  -2   3   9 44976.5 893.291  13
   2  -3  -8 7650.65 250.571   3
   2  -3  -8 8026.26 194.537   2
   2  -3  -7 25718.9 525.135   2
   2  -3  -7 26348.4 688.193   1
   2  -3  -7 25003.4 610.434   4
   2  -3  -7 26058.3 615.063   3
   2  -3  -6 8584.85 273.892   4
   2  -3  -6 8469.40 311.700   1
   2  -3  -6 8310.32 272.057   3
   2  -3  -5 10590.2 334.319   1
   2  -3  -5 9922.48 303.104   3
   2  -3  -5 9662.12 301.762   4
   2  -3  -4 49592.6 1084.42   4
   2  -3  -4 50798.7 1100.96   1
   2  -3  -4 51295.5 1086.39   3
   2  -3  -3 6062.91 218.301   1
   2  -3  -3 6096.50 221.540   3
   2  -3  -3 6006.67 221.943   4
   2  -3  -2 9269.27 277.341   1
   2  -3  -2 9146.55 289.708   3
   2  -3  -2 9791.16 299.806   4
   2  -3  -1 14591.9 368.117   1
   2  -3  -1 14117.4 392.871   3
   2  -3  -1 14423.6 397.514   4
   2  -3   0 129048. 2496.33   4
   2  -3   0 120465. 2498.90  23
   2  -3   0 129426. 2440.16   1
   2  -3   0 123038. 2485.08   3
   2  -3   1 36543.6 813.944   3
   2  -3   1 35966.8 818.047   4
   2  -3   2 54293.0 1171.32   4
   2  -3   2 55604.2 1168.09   3
   2  -3   3 97042.4 1920.49   3
   2  -3   3 94842.6 1927.68   4
   2  -3   3 94407.3 1924.62  47
   2  -3   4 15456.4 408.270   3
   2  -3   4 14686.9 410.595   4
   2  -3   4 14513.9 417.903  47
   2  -3   5 2798.72 159.872  47
   2  -3   5 2799.94 143.439   4
   2  -3   5 2857.23 139.912   3
   2  -3   6 5100.00 204.076   4
   2  -3   6 5524.96 243.299  47
   2  -3   6 5551.88 204.694   3
   2  -3   7 62283.9 1394.77  47
   2  -3   7 62161.9 1295.76   3
   2  -3   8 32.1218 13.7083  36
   2  -3   8 41.5643 16.3545  33
   2  -3   8 60.7871 16.2626  30
   2  -3   8 65.3947 50.6451  47
   2  -3   9 2776.39 98.1441  17
   2  -3   9 2996.97 101.194   7
   2  -3   9 2931.77 97.2600  32
   2  -3   9 2740.57 197.340  47
   2  -3   9 3042.72 106.935  33
   2  -3   9 2779.58 103.067  30
   2  -3   9 2875.87 101.048  36
   2  -3  10 5937.19 168.585  17
   2  -3  10 6635.11 185.865  33
   2  -3  10 6340.69 184.155  30
   2  -3  10 6898.99 181.400   7
   2  -3  10 7179.01 342.807  47
   2  -3  10 6412.95 178.606  36
   2  -3  11 39292.1 823.241  36
   2  -3  11 39930.7 820.178  35
   2  -3  11 40210.7 822.842   7
   2  -3  11 39739.1 831.841  33
   2  -3  11 41645.5 808.603  13
   2  -3  11 39558.6 832.282  30
   2  -3  12 168.482 24.0171  13
   2  -3  12 159.130 32.5181  33
   2  -3  12 163.406 33.1426  30
   2  -3  12 178.333 32.7745  35
   2  -3  12 130.689 31.3309  36
   2  -3  12 222.005 81.1142  47
   2  -3  12 175.643 31.5638   7
   2  -3  13 184.044 26.5583  13
   2  -3  13 160.784 33.7925   7
   2  -3  13 217.076 35.9899  30
   2  -3  13 197.805 38.4945  33
   2  -3  13 169.658 33.2648  35
   2  -3  13 189.286 37.6513  36
   2  -3  14-37.3084 52.4363  47
   2  -3  14 30.1719 26.8715  36
   2  -3  14 12.0300 26.2329   7
   2  -3  14 0.74103 14.8116  13
   2  -3  14 12.3692 24.0586  30
   2  -3  14 27.6474 26.6358  35
   2  -3  15 6096.86 191.552  36
   2  -3  15 6578.73 189.817  35
   2  -3  15 6296.14 190.232  30
   2  -3  15 6203.84 168.723  13
   2  -3  15 6286.17 353.925  47
  -2   3 -15 6192.43 173.822   9
   2  -3  16 25.0048 27.9926  35
  -2   3 -16 27.8138 15.5970   9
   2  -3  16 32.1802 13.9172  13
   2  -3  16 46.9197 27.0292  34
   2  -3  16 35.2625 20.5226  30
   2  -3  16 78.2073 26.7422   6
   2  -3  17 139.299 26.6262  34
   2  -3  17 164.617 23.8952  30
  -2   3 -17 135.344 20.2569   9
   2  -3  17 164.073 27.8073   6
   2  -3  18 1413.27 60.7669  34
   2  -3  18 1456.94 61.8237   6
   2  -2 -19 121.306 18.8225  26
  -2   2  19 62.7196 19.0570  13
  -2   2  19 76.1313 15.3748   6
  -2   2  19 94.9302 19.1637  11
   2  -2 -18 13484.9 309.317   8
  -2   2  18 13322.0 306.789   6
  -2   2  18 13843.8 317.538  13
  -2   2  17 6419.21 180.045   6
   2  -2 -17 6489.25 173.181  25
  -2   2  17 6332.11 186.693  13
   2  -2 -17 6506.30 188.765   2
  -2   2  16 537.680 50.9162  13
   2  -2 -16 596.376 45.6169  25
   2  -2 -16 559.825 49.3066   2
   2  -2 -16 588.956 55.8874   9
  -2   2  15 3697.86 136.803  13
   2  -2 -15 3783.00 288.077   1
   2  -2 -15 3838.18 139.493   2
   2  -2 -15 3895.96 143.211   9
  -2   2  14 16147.0 380.551  13
   2  -2 -14 15925.7 627.591   1
   2  -2 -14 16142.2 381.081   2
   2  -2 -14 15556.8 382.600   9
  -2   2  13 1800.44 86.6238  13
   2  -2 -13 1916.76 88.7572   2
   2  -2 -13 1878.19 189.665   1
   2  -2 -13 1643.74 85.5235   9
   2  -2 -12 5387.92 169.581   9
  -2   2  12 5537.21 167.461  13
  -2   2  12 5218.66 270.679  47
   2  -2 -12 5542.04 166.483   2
   2  -2 -11 1208.68 66.6724   9
   2  -2 -11 1263.84 65.5838   2
  -2   2  11 1222.11 64.4882  13
   2  -2 -10 2447.49 186.870   1
  -2   2  10 2639.10 96.4206  13
   2  -2 -10 2559.14 95.3681   2
   2  -2 -10 2738.29 99.1862   9
   2  -2  -9 101.812 18.1905   9
   2  -2  -9 149.255 54.9752   1
  -2   2   9 102.460 18.5936  13
   2  -2  -9 153.348 23.6945   2
   2  -2  -8 3181.62 186.094   1
   2  -2  -8 3035.90 97.3785   2
   2  -2  -7 5868.02 189.051   3
   2  -2  -7 5924.13 191.087   4
   2  -2  -7 5845.35 250.546   1
   2  -2  -7 5871.61 149.683   2
   2  -2  -6 204.065 31.4926   4
   2  -2  -6 201.396 47.8066   1
   2  -2  -6 194.222 32.2789   3
   2  -2  -5 6808.18 250.600   1
   2  -2  -5 6859.50 219.953   3
   2  -2  -5 7187.48 221.722   4
   2  -2  -4 39158.9 841.861   3
   2  -2  -4 39421.2 872.485   1
   2  -2  -4 39070.4 840.533   4
   2  -2  -3 26838.9 610.353   1
   2  -2  -3 25642.6 594.015   3
   2  -2  -3 25912.4 595.435   4
   2  -2  -2 108.515 27.4447   4
   2  -2  -2 164.916 31.2956   1
   2  -2  -2 105.201 27.6849   3
   2  -2  -1 1528.69 90.1227   3
   2  -2   0 80258.6 1607.13   3
   2  -2   1 3104.61 124.904  45
   2  -2   1 3118.97 119.349  47
   2  -2   1 3036.15 131.942   3
   2  -2   2 1474.95 79.6227  45
   2  -2   2 1488.65 89.4174   4
   2  -2   2 1515.74 85.4066  47
   2  -2   2 1473.73 88.1826   3
   2  -2   3 645960. 11471.4   3
   2  -2   3 606171. 11472.6  47
   2  -2   3 638183. 11475.3   4
   2  -2   3 633473. 11437.3  45
   2  -2   4 6735.47 219.047   4
   2  -2   4 6938.23 193.604  45
   2  -2   4 6702.97 216.225   3
   2  -2   4 6428.06 230.372  47
   2  -2   5 88292.8 1707.32   4
   2  -2   5 82392.3 1690.46   3
   2  -2   5 86551.0 1652.10  45
   2  -2   5 81450.6 1743.47  47
   2  -2   6 18852.1 461.386   4
   2  -2   6 19634.0 459.345   3
   2  -2   6 18317.1 519.221  47
   2  -2   7 82983.2 1634.69   3
   2  -2   7 80608.5 1748.72  47
   2  -2   7 82486.7 1639.13   4
   2  -2   8 6378.35 283.558  47
   2  -2   9 4908.32 143.812  36
   2  -2   9 5232.77 147.681  33
   2  -2   9 5302.01 147.912   7
   2  -2  10 25112.3 522.314  33
   2  -2  10 25227.5 520.381   7
   2  -2  10 23881.1 507.574  13
   2  -2  10 23874.7 724.843  47
   2  -2  10 24250.7 518.386  36
   2  -2  10 23956.3 522.203  30
   2  -2  11 714.912 50.6834  33
   2  -2  11 653.702 48.8381  30
   2  -2  11 658.685 47.7838  36
   2  -2  11 594.514 101.829  47
   2  -2  11 728.075 45.4948  13
   2  -2  11 726.877 49.7101   7
   2  -2  12 29664.3 639.950   7
   2  -2  12 31383.1 632.067  13
   2  -2  12 29632.1 644.295  33
   2  -2  12 29940.5 638.986  35
   2  -2  12 29861.0 645.944  30
   2  -2  12 30466.1 644.275  36
   2  -2  13 2469.34 105.113  36
   2  -2  13 2352.36 103.173  30
   2  -2  13 2397.72 104.195  33
   2  -2  13 2207.99 90.5535  13
   2  -2  13 2380.87 102.849   7
   2  -2  13 2220.74 99.2625  35
   2  -2  14 28663.9 599.714  13
   2  -2  14 27155.6 610.086   7
   2  -2  14 27661.3 884.414  47
   2  -2  14 28506.4 618.683  36
   2  -2  14 28699.5 614.355  30
   2  -2  14 28712.0 614.817  35
   2  -2  15 1591.06 86.6541  36
   2  -2  15 1799.62 188.940  47
   2  -2  15 1569.59 85.8687  35
   2  -2  15 1568.77 75.4038  13
   2  -2  15 1572.57 84.1188   7
   2  -2  15 1648.85 80.3276  30
   2  -2  16 195.044 29.4087  13
   2  -2  16 274.946 38.7990  35
   2  -2  16 210.416 27.7732  30
  -2   2 -16 188.436 28.2019   9
   2  -2  17 351.505 30.0617  30
   2  -2  17 380.222 34.6401  13
  -2   2 -17 338.860 34.9493   9
   2  -2  18 2108.60 82.6367  34
   2  -2  18 1978.87 72.4811  13
   2  -2  18 2150.69 85.0005   6
  -2   2 -18 2021.99 77.1116   9
  -2   2 -19 293.513 24.1746   9
   2  -2  19 317.898 27.9666  34
   2  -2  19 301.705 28.4853   6
  -2   1  19 12682.5 281.458   6
   2  -1 -19 12867.4 286.010   8
  -2   1  19 12574.9 278.166  11
   2  -1 -19 12244.4 268.094  26
  -2   1  18 5015.53 144.995   6
  -2   1  18 5219.13 150.769  13
  -2   1  17 1072.51 61.3592   6
  -2   1  17 1021.66 62.1504  13
  -2   1  16 101.604 28.0554   6
   2  -1 -16 132.227 20.6443  25
  -2   1  16 119.851 23.1580  29
  -2   1  16 111.153 32.2560  13
   2  -1 -16 88.3615 25.2309   2
   2  -1 -16 135.850 32.0348   9
  -2   1  15 5410.57 172.830  13
   2  -1 -15 5597.45 176.017   2
   2  -1 -15 5354.88 173.043   9
  -2   1  14 355.211 43.5313  13
   2  -1 -14 345.253 39.4831   2
   2  -1 -14 347.114 42.8598   9
   2  -1 -14 376.890 102.085   1
   2  -1 -13 8994.19 239.985   2
   2  -1 -13 8842.16 427.912   1
   2  -1 -13 8892.37 239.837   9
  -2   1  13 8802.77 238.889  13
  -2   1  12 57.3286 40.4320  47
   2  -1 -12 105.960 46.2613   1
   2  -1 -12 61.1600 21.1501   2
  -2   1  12 51.4369 21.1412  13
   2  -1 -12 88.2563 25.0780   9
  -2   1  11 29280.7 604.544  30
   2  -1 -11 28446.1 617.083   2
  -2   1  11 30925.7 623.261  13
  -2   1  11 30764.6 788.519  47
   2  -1 -11 29733.8 621.089   9
   2  -1 -11 29689.2 847.424   1
   2  -1 -10 4103.32 124.823   2
   2  -1 -10 3781.26 123.049   9
  -2   1  10 4038.79 125.410  13
   2  -1 -10 3953.56 233.438   1
  -2   1  10 3643.54 197.934  47
   2  -1  -9 8614.12 205.912   2
   2  -1  -9 8016.25 204.158   9
  -2   1   9 8196.15 205.252  13
   2  -1  -9 8247.98 332.830   1
   2  -1  -8 31.2380 13.2664   2
   2  -1  -8 14.2635 32.0808   1
  -2   1   7 1139.04 55.8490  46
   2  -1  -7 1082.52 53.6796   3
   2  -1  -7 1038.43 56.5122   4
   2  -1  -7 1094.77 48.0066   2
   2  -1  -7 1048.39 96.4063   1
   2  -1  -6 26.0133 10.5696   4
   2  -1  -6 23.3800 21.6930   1
   2  -1  -6 63.9021 17.0502   3
   2  -1  -5 432.363 55.8991   1
   2  -1  -5 424.094 41.1194   3
   2  -1  -5 442.484 41.6391   4
   2  -1  -4 5060.56 189.488   1
   2  -1  -4 4956.85 165.030   3
   2  -1  -3 640.308 57.0325   1
   2  -1  -2 15856.5 386.425  45
   2  -1  -2 15380.9 381.419   1
   2  -1  -1 126650. 2448.40  45
   2  -1   0 157944. 3021.85  45
   2  -1   1 23479.3 498.524  47
   2  -1   1 23852.5 521.542  45
   2  -1   2 122058. 2386.54  47
   2  -1   2 126561. 2389.41  45
   2  -1   3 551895. 10841.6  47
   2  -1   3 601571. 10824.4  45
   2  -1   4 999999. 18008.1  45
   2  -1   4 915700. 18048.1  47
   2  -1   5 9273.03 253.728   4
   2  -1   5 9435.29 253.873   3
   2  -1   5 9657.77 244.025  45
   2  -1   5 8944.65 288.968  47
   2  -1   6 22577.3 491.073   3
   2  -1   6 21608.4 490.937   4
   2  -1   6 20791.9 557.091  47
   2  -1   6 21912.1 479.009  45
   2  -1   7 34229.5 723.513   4
   2  -1   7 35245.8 724.929   3
   2  -1   7 35364.0 719.822  45
   2  -1   7 35336.9 842.017  47
   2  -1   8 1101.53 108.250  47
   2  -1   9 30807.4 815.563  47
   2  -1  10 6139.47 170.073  36
   2  -1  10 6197.74 169.093  33
   2  -1  10 6552.52 173.731   7
   2  -1  10 6098.13 302.683  47
   2  -1  11 29168.3 602.566  33
   2  -1  11 29754.3 599.821  13
   2  -1  11 28185.7 602.389  30
   2  -1  11 29354.9 836.768  47
   2  -1  11 29321.1 605.103  36
   2  -1  11 28672.4 605.028   7
   2  -1  12 2434.35 99.4828  35
   2  -1  12 2647.36 102.410  33
   2  -1  12 2717.88 103.791  36
   2  -1  12 2659.82 101.642  30
   2  -1  12 2519.40 207.554  47
   2  -1  12 2560.96 98.0840  13
   2  -1  12 2532.38 101.845   7
   2  -1  13 2176.40 199.372  47
   2  -1  13 2008.56 87.6404  30
   2  -1  13 1962.36 90.4953  36
   2  -1  13 1940.57 85.6874  13
   2  -1  13 2034.44 91.9696  35
   2  -1  13 1863.00 89.3822   7
   2  -1  13 1891.83 89.6431  33
   2  -1  14 2685.42 111.147  36
   2  -1  14 2733.40 112.431   7
   2  -1  14 2643.55 101.298  30
   2  -1  14 2632.00 104.570  13
   2  -1  14 2614.06 228.307  47
   2  -1  14 2683.26 112.521  35
   2  -1  15 27420.9 598.648  36
   2  -1  15 27559.7 588.283  13
   2  -1  15 26548.0 597.736   7
   2  -1  15 27439.6 578.856  30
   2  -1  15 27764.2 601.528  35
   2  -1  16 853.156 56.5780  13
   2  -1  16 857.852 136.387  47
   2  -1  16 786.888 60.5415   7
   2  -1  16 813.827 61.6812  35
   2  -1  17 1101.28 69.3313  35
   2  -1  17 1213.06 65.2161  13
  -2   1 -17 1202.87 69.4347   9
  -2   1 -18 106.036 23.8540   9
   2  -1  18 137.836 26.0062  13
   2  -1  19 6360.53 166.841   6
  -2   1 -19 6027.58 161.682   9
   2  -1  19 5912.75 154.700  13
   2  -1  19 5837.63 158.406  34
   2  -1  20 1171.28 48.6502  34
   2  -1  20 1272.58 54.1078   6
  -2   0  19 1140.22 51.3185  13
  -2   0  19 1043.17 45.1758  11
  -2   0  19 1038.58 48.8881   6
   2   0 -19 1086.00 55.8768   8
  -2   0  18 50838.6 975.928  29
  -2   0  18 47033.2 972.848  11
   2   0 -18 51344.7 961.795  26
  -2   0  18 48584.3 981.301   6
  -2   0  18 52995.8 987.651  13
  -2   0  17 58.4567 25.3323   6
  -2   0  17 64.0326 26.7247  13
  -2   0  17 68.3793 24.1680  11
  -2   0  17 65.6095 19.2839  29
  -2   0  16 274.270 39.7553  13
  -2   0  16 281.509 33.7002  29
  -2   0  16 261.391 38.6009   6
   2   0 -15 979.766 62.9256   2
  -2   0  15 931.878 50.4244  30
  -2   0  15 965.409 66.0857  13
   2   0 -15 903.478 62.0640   9
   2   0 -14 17475.5 411.684   9
  -2   0  14 18310.8 417.970  13
   2   0 -14 18132.4 417.985   2
  -2   0  14 17954.4 395.887  30
   2   0 -13 4336.29 144.897   2
  -2   0  13 4104.43 131.970  30
  -2   0  13 4282.10 144.307  13
   2   0 -13 4100.51 139.711   9
   2   0 -12 719.793 51.0937   2
   2   0 -12 702.777 108.414   1
  -2   0  12 710.731 92.3746  47
  -2   0  12 684.910 47.0491  30
  -2   0  12 736.100 51.6800  13
   2   0 -12 662.412 49.6665   9
   2   0 -11 761.663 50.8838   2
  -2   0  11 779.082 49.1612  30
  -2   0  11 808.466 52.0661  13
   2   0 -11 676.748 101.094   1
  -2   0  11 685.351 87.7918  47
   2   0 -11 753.188 48.7270   9
   2   0 -10 15099.9 338.454   2
  -2   0  10 15483.5 342.396  13
   2   0 -10 14926.1 507.298   1
  -2   0  10 15678.2 467.411  47
  -2   0  10 14571.1 339.237  30
   2   0 -10 14880.5 338.678   9
   2   0  -9 7770.60 318.059   1
  -2   0   9 7923.43 199.571  13
   2   0  -9 7798.09 197.512   9
   2   0  -9 7965.30 197.381   2
   2   0  -8 8280.60 198.315   2
   2   0  -8 8336.88 309.354   1
  -2   0   8 8434.80 281.170  47
  -2   0   7 12194.6 336.153  47
   2   0  -7 11537.6 256.154   2
   2   0  -7 11404.3 364.002   1
  -2   0   6 5240.83 168.392  44
   2   0  -6 5261.56 148.844   3
   2   0  -6 5201.11 208.254   1
  -2   0   6 5283.14 180.883  47
  -2   0   6 4996.48 154.069  46
   2   0  -5 5437.68 201.891   1
  -2   0   5 5290.78 160.865  46
   2   0  -4 102261. 2021.00   1
   2   0  -3 144.968 27.8712   1
   2   0  -3 156.208 27.0520  45
   2   0  -2 417.197 39.6437  45
   2   0  -1 5260.03 165.208  45
   2   0   0 40969.8 775.896  47
   2   0   0 40845.8 841.663  45
   2   0   1 11972.9 295.497  45
   2   0   2 38554.2 797.236  45
   2   0   3 133.399 23.3553  45
   2   0   4 338330. 6363.24  45
   2   0   5 38375.9 804.093  45
   2   0   6 3206.06 126.212  45
   2   0   7 29937.1 612.870   4
  -2   0  -7 29569.4 623.080  46
   2   0   7 30441.8 618.745   3
   2   0   7 30513.4 653.855  45
  -2   0  -7 28708.9 589.868   2
  -2   0  -7 29291.2 620.208  44
  -2   0  -8 18381.8 387.056   2
   2   0   8 18272.2 441.073  45
  -2   0  -9 3774.12 114.373   2
   2   0   9 3914.37 147.405  45
   2   0  10 3378.54 111.689   7
   2   0  10 3626.97 221.092  47
   2   0  11 17135.8 374.687  33
   2   0  11 16867.8 379.750   7
   2   0  11 16123.2 568.620  47
   2   0  11 16688.6 375.200  36
   2   0  12 14104.1 329.018  36
   2   0  12 14184.6 538.131  47
   2   0  12 13962.7 326.203  33
   2   0  12 14372.2 334.928   7
   2   0  12 13928.8 331.561  35
   2   0  13 55.7955 22.9860  35
   2   0  13 67.2344 22.7735  13
   2   0  13 86.7183 56.6448  47
   2   0  13 58.6757 22.3729   7
   2   0  13 73.4911 21.3133  36
   2   0  14 20983.3 454.259  36
   2   0  14 20248.0 455.089  13
   2   0  14 20149.6 714.341  47
   2   0  14 19561.6 459.726   7
   2   0  14 19707.2 457.145  35
   2   0  15 11297.8 280.219  36
   2   0  15 11058.6 288.145  35
   2   0  15 10979.9 290.348   7
   2   0  15 11550.7 515.352  47
   2   0  15 11016.1 283.465  13
   2   0  16 504.645 47.7690  13
   2   0  16 482.003 51.5906   7
   2   0  16 549.966 109.370  47
   2   0  16 539.434 52.2085  35
   2   0  17 210.144 34.9184  35
   2   0  17 209.605 34.2405  13
  -2   0 -17 220.762 38.3294   9
   2   0  18 2890.78 108.240  13
  -2   0 -18 2833.84 112.884   9
   2   0  19 1351.14 64.3320  13
  -2   0 -19 1280.29 66.5404   9
   2   0  20 1602.38 63.7436  34
   2   0  20 1743.28 65.8068  13
  -2   0 -20 1761.26 69.4998   9
  -2  -1  18 749.847 44.3704  13
  -2  -1  18 825.735 45.6058  29
  -2  -1  18 732.617 40.1694  11
  -2  -1  18 732.575 44.2548   6
  -2  -1  17 659.392 47.9833   6
  -2  -1  17 624.661 41.5775  11
  -2  -1  17 539.771 41.4886  29
  -2  -1  17 594.398 44.3678  13
  -2  -1  16 84.0303 18.8731  30
  -2  -1  16 30.4808 23.7228  29
  -2  -1  16 43.4482 24.8279  13
  -2  -1  16 56.8293 23.4806  11
  -2  -1  15 374.272 43.3921  13
  -2  -1  15 355.448 44.0262   6
   2   1 -15 341.028 37.6508   9
  -2  -1  15 341.345 34.8552  30
  -2  -1  14 7404.30 205.662  30
  -2  -1  14 7727.18 213.759  13
  -2  -1  14 7397.87 213.083   6
   2   1 -14 7555.96 207.909   9
  -2  -1  13 11674.9 297.486  30
   2   1 -13 11878.3 295.165   9
  -2  -1  13 12405.3 302.332  13
   2   1 -13 12482.9 301.196   2
  -2  -1  12 31.0457 20.4009  30
  -2  -1  12 59.7903 15.8667  12
   2   1 -12 62.8380 19.7788   2
  -2  -1  12 30.0381 25.0856  13
   2   1 -11 6365.01 179.931   2
   2   1 -11 6952.23 324.734   1
  -2  -1  11 6575.24 175.309  12
  -2  -1  11 7061.89 294.871  47
   2   1 -11 6402.25 178.534   9
  -2  -1  11 6514.36 182.509  13
  -2  -1  11 6367.61 186.344  30
   2   1 -10 6643.15 178.131   2
  -2  -1  10 6646.75 187.773  30
   2   1 -10 6673.28 177.659   9
  -2  -1  10 6668.12 180.509  13
   2   1 -10 6780.71 306.295   1
  -2  -1  10 6477.14 272.608  47
   2   1  -9 3462.34 108.979   2
  -2  -1   9 3503.38 118.649  30
  -2  -1   9 3942.60 191.706  47
  -2  -1   9 3621.71 113.183  13
   2   1  -9 3562.65 110.834   9
   2   1  -9 3511.28 198.449   1
   2   1  -8 2401.91 150.123   1
   2   1  -8 2355.16 80.6828   2
   2   1  -7 26104.2 648.757   1
   2   1  -7 25795.5 527.341   2
  -2  -1   6 18922.8 417.379  46
  -2  -1   6 19037.8 433.560  23
   2   1  -6 18481.8 486.117   1
  -2  -1   6 18995.6 437.503  44
  -2  -1   6 19848.9 466.321  47
  -2  -1   5 38549.0 830.920  46
   2   1  -5 39881.2 859.740   1
  -2  -1   5 41110.5 833.024  47
  -2  -1   5 38703.6 849.174  44
  -2  -1   4 61.4315 19.1500  46
   2   1  -4 60.3830 17.7137  45
  -2  -1   4 65.3915 23.0044  44
  -2  -1   4 86.4226 18.2254  47
   2   1  -4 81.7068 21.6650   1
   2   1  -3 72471.3 1381.83  45
   2   1  -3 66011.5 1380.90   1
  -2  -1   3 73099.3 1347.19  47
  -2  -1   3 64275.3 1385.61  46
   2   1  -2 1955.98 88.9840  45
  -2  -1   2 2025.73 93.2759  46
  -2  -1   1 26770.2 574.403  46
   2   1  -1 25981.2 569.723  45
  -2  -1   0 625.465 48.3826  46
   2   1   0 681.788 50.4076  45
  -2  -1  -1 176170. 3269.38  46
   2   1   1 166696. 3271.47  45
  -2  -1  -2 16150.3 380.606  46
   2   1   2 16425.9 393.760  45
  -2  -1  -3 13056.5 318.294  46
   2   1   3 12602.2 332.992  45
  -2  -1  -4 85540.5 1629.61  46
   2   1   4 79218.7 1653.66  45
  -2  -1  -5 6556.96 204.091  44
   2   1   5 6596.56 221.842  45
  -2  -1  -5 6854.28 202.669  46
  -2  -1  -6 33853.4 733.587  46
  -2  -1  -6 34772.1 737.853  44
   2   1   6 34365.3 771.229  45
  -2  -1  -7 1651.65 59.1973   2
   2   1   7 1536.45 100.734  45
  -2  -1  -7 1481.24 81.8076  44
  -2  -1  -7 1660.45 86.5033  46
  -2  -1  -8 16875.4 395.826  46
  -2  -1  -8 17744.1 369.152   2
  -2  -1  -8 17556.0 382.980  23
  -2  -1  -8 17482.4 385.379  44
   2   1   8 17395.4 463.186  45
  -2  -1  -9 2333.44 82.0448   2
   2   1   9 2523.15 138.212  45
   2   1  10 613.303 65.8193  45
  -2  -1 -10 605.465 40.4730   2
   2   1  11 21934.9 475.397   7
  -2  -1 -11 21874.6 470.964   2
  -2  -1 -12 17775.5 394.556   2
   2   1  12 17397.1 383.747  36
   2   1  12 17292.5 391.234  35
   2   1  12 17291.5 396.798   7
   2   1  13 3803.33 269.056  47
   2   1  13 3372.63 127.176   7
   2   1  13 3744.27 119.947  36
   2   1  13 3526.57 123.978  35
   2   1  14 2305.44 89.6913  36
   2   1  14 2214.13 99.5310  13
   2   1  14 2165.98 94.4103  35
   2   1  14 2382.12 216.657  47
   2   1  14 2201.63 100.446   7
   2   1  15 12581.2 301.967  35
   2   1  15 11257.2 303.965   7
   2   1  15 11885.0 305.797  13
   2   1  15 12278.0 541.368  47
   2   1  16 173.406 31.1342  35
   2   1  16 107.392 55.5543  47
   2   1  16 151.867 32.6457   7
   2   1  16 152.180 34.1516  13
   2   1  17 729.035 59.3252  13
   2   1  17 820.169 131.959  47
  -2  -1 -17 687.522 59.4995   9
  -2  -1 -18 299.520 43.3752   9
   2   1  18 231.888 36.5067  13
   2   1  19 5729.94 165.196  13
  -2  -1 -19 5498.43 167.808   9
   2   1  20 2060.13 78.8469  13
  -2  -1 -20 2081.23 82.0241   9
  -2  -2  18 2824.32 91.7968  29
  -2  -2  18 2860.92 86.4357  13
  -2  -2  18 2887.23 92.6299   6
  -2  -2  18 2713.51 87.5440  39
  -2  -2  17 17163.8 377.669   6
  -2  -2  17 17484.8 377.967  29
  -2  -2  17 17239.3 370.102  13
  -2  -2  17 16592.6 363.947  11
  -2  -2  16 1686.06 75.9232  13
  -2  -2  16 1778.32 79.8906  29
  -2  -2  16 1789.72 81.1139   6
  -2  -2  16 1650.27 71.7886  11
  -2  -2  16 1735.17 73.8743  30
  -2  -2  15 2963.57 117.012   6
  -2  -2  15 3166.87 114.837  13
  -2  -2  15 3126.91 113.813  30
  -2  -2  15 3210.45 110.369  11
  -2  -2  14 13192.9 311.714  11
  -2  -2  14 12866.8 318.976  30
  -2  -2  14 12768.1 320.419   6
  -2  -2  14 13337.9 317.423  13
  -2  -2  13 15850.6 375.316   6
  -2  -2  13 16094.9 370.942  13
  -2  -2  13 15314.1 375.929  30
   2   2 -13 16141.5 364.244   9
  -2  -2  12 2340.99 96.1630  13
   2   2 -12 2232.62 90.8084   9
  -2  -2  12 2363.68 99.3172   6
  -2  -2  12 2236.76 91.5255  12
  -2  -2  12 2190.29 100.228  30
  -2  -2  11 1040.83 65.2723  30
  -2  -2  11 1133.75 62.1929  13
  -2  -2  11 1016.57 105.878  47
   2   2 -11 1091.10 58.3550   9
  -2  -2  11 1059.14 57.9504  12
  -2  -2  10 13274.3 296.800  13
  -2  -2  10 12145.4 305.176  30
   2   2 -10 12466.2 289.903   9
  -2  -2  10 12766.5 416.494  47
  -2  -2  10 12304.6 291.253  12
  -2  -2   9 311.181 30.9627  13
  -2  -2   9 311.732 58.3065  47
  -2  -2   9 282.777 33.2551  30
   2   2  -9 255.353 25.7262   9
   2   2  -8 5751.30 149.056   2
  -2  -2   8 5853.18 164.891  30
   2   2  -8 6144.22 241.768   1
  -2  -2   8 5603.33 231.225  47
   2   2  -7 3563.28 100.908   2
   2   2  -7 3837.34 172.736   1
  -2  -2   7 3690.29 166.948  47
  -2  -2   6 101861. 1962.95  44
  -2  -2   6 95642.3 1951.78  23
   2   2  -6 97449.0 1979.57   1
  -2  -2   6 99718.4 1945.61  46
  -2  -2   6 103656. 1989.60  47
  -2  -2   5 13144.6 342.245  47
  -2  -2   5 12824.7 350.248  23
   2   2  -5 13322.3 345.316   1
  -2  -2   5 13068.3 346.609  46
  -2  -2   5 12898.6 356.508  44
  -2  -2   4 42656.0 946.521  46
   2   2  -4 43492.3 915.184   1
  -2  -2   4 42218.4 946.525  23
   2   2  -4 45624.1 901.580  45
  -2  -2   4 43986.9 963.307  44
  -2  -2   4 45616.9 913.799  47
   2   2  -3 18177.1 410.838   1
  -2  -2   3 17991.6 457.603  46
  -2  -2   3 18202.8 470.522  44
   2   2  -3 17584.9 413.497  45
  -2  -2   2 2050.34 113.606  46
  -2  -2   2 2094.98 120.189  44
   2   2  -2 2170.53 96.9936  45
  -2  -2   1 18055.3 459.581  46
   2   2  -1 18686.7 434.660  45
  -2  -2   1 18062.9 467.839  44
   2   2   0 474.733 47.8176  45
  -2  -2   0 548.413 56.9440  44
  -2  -2   0 501.179 55.2817  46
   2   2   1 2787.97 128.324  45
  -2  -2  -1 2843.21 131.296  46
  -2  -2  -1 2705.93 132.360  44
  -2  -2  -2 76086.3 1536.90  46
  -2  -2  -2 78193.3 1548.16  44
   2   2   2 73777.9 1540.68  45
  -2  -2  -3 887.181 71.8073  44
  -2  -2  -3 902.650 70.8077  46
   2   2   3 874.910 74.8632  45
  -2  -2  -4 35749.8 784.592  44
  -2  -2  -4 34260.2 774.191  46
   2   2   4 35446.3 799.675  45
   2   2   5 8320.41 281.356  45
  -2  -2  -5 8564.59 262.576  46
  -2  -2  -5 8440.40 265.149  44
  -2  -2  -6 98.6973 31.0038  44
   2   2   6 132.123 35.8575  45
  -2  -2  -6 121.888 14.6097   2
  -2  -2  -6 154.937 30.9405  46
  -2  -2  -6 95.0465 28.4660  23
  -2  -2  -7 5887.89 205.626  44
  -2  -2  -7 5823.50 204.870  23
  -2  -2  -7 6102.05 208.581  46
  -2  -2  -7 6042.96 148.676   2
   2   2   8 84203.4 1708.28  45
  -2  -2  -8 80147.6 1615.24  44
  -2  -2  -8 82866.1 1625.14  46
  -2  -2  -8 80311.3 1616.41  23
  -2  -2  -8 79922.2 1545.81   2
   2   2   9 3826.71 193.890  45
  -2  -2  -9 3708.13 111.705   2
  -2  -2 -10 34.9396 16.0845   2
   2   2  10-16.6929 27.9947  45
   2   2  11 223.983 52.1060  45
  -2  -2 -11 232.303 29.1129   2
   2   2  11 204.960 27.2657   7
   2   2  12 38018.3 757.529   7
   2   2  12 37638.3 742.586  35
  -2  -2 -13 73.5378 23.9279   2
   2   2  13 74.8753 19.2161  35
   2   2  13 57.3836 22.0309   7
   2   2  14 1.10402 20.3570   7
   2   2  14 34.7387 27.0574  13
   2   2  14 22.3640 19.7583  35
   2   2  15 5233.46 156.635  35
   2   2  15 5124.28 172.263  13
   2   2  15 4770.49 333.311  47
   2   2  15 5063.55 169.378   7
   2   2  16 28630.1 639.214   7
   2   2  16 28277.8 644.137  13
   2   2  16 29672.0 964.726  47
   2   2  17 816.834 140.014  47
  -2  -2 -17 900.531 68.3078   9
   2   2  17 802.260 64.3888  13
   2   2  18 7220.34 208.313  13
  -2  -2 -18 6892.68 207.288   9
   2   2  19 477.782 47.0745  13
  -2  -2 -19 490.699 45.0192   9
   2   2  20 7672.40 198.816  13
  -2  -2 -20 7695.92 198.655   9
  -2  -3  17 30256.8 609.317  29
  -2  -3  17 29056.2 596.569  30
  -2  -3  17 30265.0 595.561  13
  -2  -3  17 29243.8 607.076   6
  -2  -3  17 29989.2 603.966  39
  -2  -3  16 8421.38 216.021  30
  -2  -3  16 8793.39 221.780  29
  -2  -3  16 8512.03 220.185   6
  -2  -3  16 8903.74 210.981  13
  -2  -3  16 8401.40 207.145  11
  -2  -3  15 4108.98 137.363  30
  -2  -3  15 4110.99 137.143  29
  -2  -3  15 4011.66 136.190   6
  -2  -3  15 4199.65 128.189  11
  -2  -3  15 4336.33 131.199  13
  -2  -3  14 394.027 43.0101  30
  -2  -3  14 472.929 41.7727  13
  -2  -3  14 492.864 41.0053  11
  -2  -3  14 424.991 45.9489   6
  -2  -3  13 4060.28 122.514  34
  -2  -3  13 3862.74 142.222  30
  -2  -3  13 3750.22 137.406   6
  -2  -3  13 3975.03 131.555  13
  -2  -3  13 3962.00 130.143  11
  -2  -3  12 1262.67 79.8428  30
  -2  -3  12 1477.69 73.5275  11
  -2  -3  12 1144.35 73.2155   6
  -2  -3  12 1539.25 73.7814  12
  -2  -3  12 1503.06 73.9356  13
  -2  -3  12 1689.23 70.7081  34
   2   3 -12 1629.15 70.8365   9
  -2  -3  11 3975.64 126.561  13
  -2  -3  11 3696.26 124.628  11
  -2  -3  11 3704.09 136.768  30
   2   3 -11 4046.13 121.940   9
  -2  -3  11 3726.91 131.095   6
  -2  -3  11 3813.73 119.900  34
  -2  -3  11 3757.69 126.400  12
  -2  -3  10 1247.30 65.3734  12
   2   3 -10 1349.31 61.3908   9
  -2  -3  10 1416.49 75.4971  30
  -2  -3  10 1428.76 66.6954  13
  -2  -3  10 1279.91 60.4133  34
  -2  -3  10 1261.58 63.9687  11
  -2  -3   9 564.479 37.1993  34
  -2  -3   9 583.756 40.9797  13
  -2  -3   9 624.016 44.9176   6
  -2  -3   9 522.164 44.4293  30
  -2  -3   9 603.158 40.9511  11
  -2  -3   9 625.780 80.3004  47
  -2  -3   9 590.100 42.3963  12
  -2  -3   8 1311.88 67.0943  30
  -2  -3   8 1377.68 60.9871  13
  -2  -3   8 1345.51 112.760  47
  -2  -3   8 1443.02 62.6034  11
  -2  -3   8 1426.39 63.8281  12
  -2  -3   8 1428.37 65.4041   6
  -2  -3   7 7553.40 270.535  47
  -2  -3   7 7653.85 187.783   6
  -2  -3   7 7093.31 191.032  30
  -2  -3   6 43944.1 976.752  23
  -2  -3   6 45955.5 990.533  44
  -2  -3   5 25452.8 629.041  44
  -2  -3   5 25026.6 617.311  46
  -2  -3   5 24860.8 619.835  23
   2   3  -5 25861.1 544.488   1
  -2  -3   4 1575.27 108.635  23
  -2  -3   4 1615.13 112.844  44
   2   3  -4 1656.78 78.5603  45
   2   3  -4 1626.84 71.0247   1
  -2  -3   4 1554.59 107.776  46
  -2  -3   3 58386.3 1276.54  44
   2   3  -3 58731.8 1197.39  45
   2   3  -3 60541.1 1158.88   1
  -2  -3   3 58691.9 1266.64  23
  -2  -3   3 56400.7 1260.43  46
  -2  -3   2 30929.0 731.983  46
  -2  -3   2 31836.1 734.664  23
   2   3  -2 29230.2 678.230  45
  -2  -3   2 31449.5 743.988  44
  -2  -3   1 5298.99 213.770  46
  -2  -3   1 5124.94 210.524  23
   2   3  -1 5143.83 190.472  45
  -2  -3   1 5265.77 219.230  44
  -2  -3   0 13611.4 387.705  23
  -2  -3   0 13223.4 391.921  44
   2   3   0 12427.3 358.239  45
  -2  -3   0 13319.5 386.093  46
  -2  -3  -1 6057.35 228.977  46
  -2  -3  -1 5887.29 231.150  44
   2   3   1 5891.08 217.560  45
  -2  -3  -2 8096.58 272.981  46
   2   3   2 7569.03 263.415  45
  -2  -3  -2 7822.93 274.718  44
  -2  -3  -3 4969.99 200.450  44
  -2  -3  -3 4996.96 198.055  46
  -2  -3  -4 33650.8 766.896  46
  -2  -3  -4 33619.4 771.964  44
  -2  -3  -5 51650.8 1002.22   2
  -2  -3  -5 53539.2 1141.17  44
  -2  -3  -5 55214.1 1143.31  46
  -2  -3  -5 52170.5 1137.46  23
  -2  -3  -6 384.126 54.4285  44
  -2  -3  -6 366.721 24.8909   2
  -2  -3  -6 362.010 52.7319  46
  -2  -3  -7 205.221 43.4883  23
  -2  -3  -7 194.702 40.3839  44
  -2  -3  -7 187.259 20.1593   2
  -2  -3  -7 182.695 37.6051  46
  -2  -3  -8 7344.33 259.266  46
  -2  -3  -8 8046.94 181.782   2
  -2  -3  -8 7241.11 256.754  44
  -2  -3  -9 8488.26 280.962  23
  -2  -3  -9 8917.18 285.574  44
  -2  -3  -9 8910.46 214.063   2
   2   3   9 8854.31 339.764  45
  -2  -3 -10 65.0530 18.8825   2
   2   3  10 15.9929 28.1203  45
   2   3  11 15399.0 349.520   7
  -2  -3 -11 14800.1 345.417   2
   2   3  11 15382.3 502.198  45
   2   3  12 348.757 68.6796  45
   2   3  12 376.224 37.5402   7
  -2  -3 -12 415.785 40.4372   2
  -2  -3 -13 441.613 43.8060   2
   2   3  13 404.923 39.7409   7
   2   3  14 10360.2 269.967   7
   2   3  15 3442.71 138.690  13
   2   3  15 3508.92 130.920   7
   2   3  16 119.724 34.2262  13
   2   3  16 83.3712 27.1514   7
   2   3  17 2947.76 261.218  47
   2   3  17 3028.92 127.569  13
  -2  -3 -17 3371.25 129.319   9
   2   3  18 6134.16 193.224  13
  -2  -3 -18 6619.04 192.867   9
   2   3  19 6732.74 199.050  13
  -2  -3 -19 7670.47 200.840   9
   2   3  20 2428.08 92.9906  13
  -2  -3 -20 2682.07 93.0299   9
  -2  -4  17 89.9074 18.3623  29
  -2  -4  17 71.1217 16.9409  39
  -2  -4  17 71.7519 14.6517  30
  -2  -4  16 415.034 35.0754  30
  -2  -4  16 392.794 36.1839  29
  -2  -4  16 462.780 37.9556  39
  -2  -4  16 428.672 37.1141   6
  -2  -4  15 10648.0 251.726  13
  -2  -4  15 10904.8 265.600  39
  -2  -4  15 11082.8 269.524  29
  -2  -4  15 11527.9 271.539   6
  -2  -4  15 11015.6 270.529  30
  -2  -4  14 3483.87 115.533  11
  -2  -4  14 3588.40 114.357  13
  -2  -4  14 3263.85 121.849  29
  -2  -4  14 3586.09 126.985   6
  -2  -4  14 3513.43 128.552  30
  -2  -4  14 3647.28 114.395  20
  -2  -4  13 6.34919 27.1501  30
  -2  -4  13-62.9436 31.0356  29
  -2  -4  13-2.06627 15.0328  34
  -2  -4  13 18.8331 18.5123  13
  -2  -4  13 44.1149 21.4127  11
  -2  -4  13 12.3646 27.7683   6
  -2  -4  12 1057.08 60.1893  12
  -2  -4  12 1002.30 64.6107   6
  -2  -4  12 1016.85 57.5648  13
  -2  -4  12 936.766 66.1537  30
  -2  -4  12 1027.87 59.1229  11
  -2  -4  12 1059.11 55.5295  34
  -2  -4  11 297.179 33.8006  11
  -2  -4  11 224.782 37.6937  30
  -2  -4  11 204.293 26.7141  34
  -2  -4  11 213.917 35.8659   6
  -2  -4  11 207.804 28.0213  13
  -2  -4  11 247.653 31.2504  12
  -2  -4  10 11695.4 277.762  34
  -2  -4  10 11281.1 297.388  30
  -2  -4  10 12138.2 284.915  11
  -2  -4  10 12137.8 292.762   6
  -2  -4  10 12278.5 290.091  12
  -2  -4  10 11730.6 279.966  13
  -2  -4   9 38888.9 821.271  30
  -2  -4   9 40271.6 802.861  13
  -2  -4   9 39476.0 812.532   6
  -2  -4   9 40007.9 814.034  12
  -2  -4   9 40078.3 806.104  11
  -2  -4   9 40783.8 802.966  34
  -2  -4   8 346.907 36.0487  30
  -2  -4   8 402.746 35.6480  12
  -2  -4   8 442.331 38.5840   6
  -2  -4   8 337.183 30.0940  34
  -2  -4   8 385.434 33.2048  11
  -2  -4   8 447.878 33.9322  13
  -2  -4   7 31439.3 642.206  34
  -2  -4   7 32306.9 658.164  30
  -2  -4   7 32539.6 652.964   6
  -2  -4   7 31793.5 642.370  13
  -2  -4   7 30969.0 645.532  11
  -2  -4   7 32501.7 653.278  12
  -2  -4   6 95538.9 1920.92  23
  -2  -4   6 94157.3 1765.69   6
  -2  -4   6 92343.3 1772.14  30
  -2  -4   6 99710.6 1938.07  44
  -2  -4   5 75100.2 1547.94  44
  -2  -4   5 70091.8 1361.74  43
  -2  -4   5 70797.0 1527.72  23
  -2  -4   5 70781.1 1360.86  48
  -2  -4   4 25996.6 689.331  23
  -2  -4   4 27713.3 711.094  44
  -2  -4   4 26671.7 693.284  46
  -2  -4   4 26550.9 544.950  43
  -2  -4   4 26774.5 543.511  48
   2   4  -3 267.959 39.6783  45
  -2  -4   3 258.047 24.4042  43
  -2  -4   3 232.993 24.2041  48
  -2  -4   3 196.683 48.6656  44
  -2  -4   3 235.645 52.0038  23
  -2  -4   3 272.406 55.2624  46
  -2  -4   2 10700.2 245.842  43
  -2  -4   2 10485.3 364.045  23
  -2  -4   2 10608.8 244.277  48
  -2  -4   2 10753.1 375.109  44
  -2  -4   2 10886.4 369.225  46
   2   4  -2 10888.2 325.506  45
  -2  -4   1 21426.2 448.921  43
  -2  -4   1 20878.8 594.153  44
   2   4  -1 21584.1 550.197  45
  -2  -4   1 21897.7 448.361  48
  -2  -4   1 21664.4 591.022  46
  -2  -4   1 21393.0 591.780  23
  -2  -4   0 15551.7 468.491  23
  -2  -4   0 15769.0 336.339  48
  -2  -4   0 15796.4 477.396  44
  -2  -4   0 15911.4 470.112  46
  -2  -4   0 15477.8 337.023  43
   2   4   0 15835.0 437.992  45
  -2  -4  -1 4079.62 115.351  43
  -2  -4  -1 4075.49 202.511  46
  -2  -4  -1 4019.74 202.306  23
  -2  -4  -1 3901.39 202.296  44
   2   4   1 4073.29 186.745  45
  -2  -4  -1 4079.85 114.282  48
  -2  -4  -2 40936.5 816.514  43
  -2  -4  -2 39992.0 968.575  23
  -2  -4  -2 42202.4 973.089  46
  -2  -4  -2 42873.2 983.261  44
  -2  -4  -2 41940.4 815.902  48
  -2  -4  -3 2927.11 89.4468  48
  -2  -4  -3 2845.19 165.348  46
  -2  -4  -3 2529.38 158.567  23
  -2  -4  -3 2797.36 88.5604  43
  -2  -4  -3 2738.18 163.081  44
  -2  -4  -4 6544.55 161.695  43
  -2  -4  -4 6451.59 264.995  44
  -2  -4  -4 6448.23 160.485  48
  -2  -4  -4 5896.33 256.781  23
  -2  -4  -4 6286.66 261.109  46
  -2  -4  -5 20173.4 408.843   2
  -2  -4  -5 19223.5 558.113  23
  -2  -4  -5 19917.3 557.709  46
  -2  -4  -5 20243.9 420.677  43
  -2  -4  -5 20015.7 562.558  44
  -2  -4  -5 20386.0 420.429  48
  -2  -4  -6 17366.4 368.987  48
  -2  -4  -6 17598.8 362.125   2
  -2  -4  -6 17310.7 368.959  43
  -2  -4  -6 17234.3 503.463  46
  -2  -4  -6 17064.9 509.567  23
  -2  -4  -6 17631.3 510.375  44
  -2  -4  -7 295.351 55.9343  44
  -2  -4  -7 266.188 23.9752   2
  -2  -4  -7 247.269 23.5480  48
  -2  -4  -7 306.828 57.9686  46
  -2  -4  -7 283.248 24.6936  43
  -2  -4  -7 338.763 60.5565  23
  -2  -4  -8 42481.9 833.173   2
  -2  -4  -8 43465.1 997.189  46
  -2  -4  -8 41960.2 830.845  43
  -2  -4  -8 41507.4 829.906  48
  -2  -4  -8 41806.7 998.088  23
  -2  -4  -8 44097.1 1006.60  44
  -2  -4  -9 15326.4 359.107  27
  -2  -4  -9 14681.5 458.428  44
  -2  -4  -9 14559.6 459.708  23
  -2  -4  -9 15654.2 340.158   2
   2   4  10 2324.61 177.849  45
  -2  -4 -10 2565.81 94.4139   2
  -2  -4 -11 5692.78 164.215   2
   2   4  11 5274.45 280.626  45
   2   4  12 35618.1 953.646  45
  -2  -4 -12 35887.5 742.842   2
   2   4  12 36744.3 737.820   7
  -2  -4 -12 34532.8 745.345  41
  -2  -4 -13 1470.43 78.4136   2
   2   4  13 1570.32 75.1440   7
  -2  -4 -13 1522.29 76.9732  41
   2   4  13 1427.99 146.115  45
   2   4  14 7657.99 208.975   7
   2   4  15 23924.5 508.820   7
   2   4  15 22285.1 529.489  13
   2   4  16 46451.9 999.058  13
   2   4  16 49844.3 971.446   7
  -2  -4 -16 47768.2 987.485   9
   2   4  17 365.463 48.5422  13
  -2  -4 -17 353.553 42.0291   9
   2   4  18 1380.51 78.7075  13
  -2  -4 -18 1517.64 75.7083   9
  -2  -4 -19 153.363 26.7561   9
   2   4  19 137.446 27.6705  13
  -2  -4 -19 131.363 22.6548  38
   2   4  20 2579.54 92.7254  13
  -2  -4 -20 2591.77 79.8443  38
  -2  -5  16 992.204 50.2029  29
  -2  -5  16 978.609 48.3126  39
  -2  -5  16 980.023 47.6853  30
  -2  -5  15 14987.4 343.288  30
  -2  -5  15 15362.8 345.031  29
  -2  -5  15 15828.6 343.982  39
  -2  -5  14 685.252 51.9026  30
  -2  -5  14 695.387 50.9029  29
  -2  -5  14 716.400 51.1879  39
  -2  -5  14 667.649 43.9004  20
  -2  -5  14 740.915 52.5363   6
  -2  -5  13 11334.5 259.049  34
  -2  -5  13 11001.8 281.955  30
  -2  -5  13 10894.7 257.221  13
  -2  -5  13 10934.1 276.020  39
  -2  -5  13 11041.6 277.677   6
  -2  -5  13 11475.5 271.538  20
  -2  -5  13 11438.5 281.259  29
  -2  -5  12 8816.51 215.579  34
  -2  -5  12 8500.37 229.720  39
  -2  -5  12 8293.19 234.709  30
  -2  -5  12 8465.33 213.198  13
  -2  -5  12 9013.06 234.253  29
  -2  -5  12 8989.99 233.616   6
  -2  -5  12 8891.58 227.850  20
  -2  -5  12 8181.86 219.224  12
  -2  -5  11 3340.60 122.071  29
  -2  -5  11 3109.87 123.619  30
  -2  -5  11 3261.11 108.111  13
  -2  -5  11 3381.81 110.158  34
  -2  -5  11 3261.98 120.503   6
  -2  -5  11 3174.80 112.696  11
  -2  -5  11 3130.12 114.944  12
  -2  -5  10 2476.67 101.767   6
  -2  -5  10 2469.37 92.0324  34
  -2  -5  10 2497.50 99.0929  12
  -2  -5  10 2372.08 88.2841  13
  -2  -5  10 2477.83 96.8300  11
  -2  -5   9 21736.8 469.307  34
  -2  -5   9 22439.7 476.734  11
  -2  -5   9 21605.5 488.640  30
  -2  -5   9 22288.4 466.241  13
  -2  -5   9 21326.8 479.708  12
  -2  -5   9 22042.2 481.341   6
  -2  -5   8 77.1634 18.4973  34
  -2  -5   8 154.086 24.9679  11
  -2  -5   8 96.0272 25.5232  30
  -2  -5   8 108.635 18.8380  13
  -2  -5   8 101.652 23.5872   6
  -2  -5   8 123.217 24.5955  12
  -2  -5   7 277.279 26.8489  13
  -2  -5   7 294.925 28.9548  34
  -2  -5   7 273.590 31.6312   6
  -2  -5   7 269.751 32.8649  12
  -2  -5   7 333.754 36.0273  30
  -2  -5   7 282.162 29.2450  11
  -2  -5   6 15.0484 12.5877  12
  -2  -5   6 0.91684 12.1143  34
  -2  -5   6-0.68532 17.5692  30
  -2  -5   6 33.2182 27.9423  23
  -2  -5   6 2.92042 18.6849  17
  -2  -5   6 29.4904 17.9746   6
  -2  -5   6 4.37902 12.2472  11
  -2  -5   5 35205.6 697.755  17
  -2  -5   5 34371.8 892.707  44
  -2  -5   5 34204.7 685.853  11
  -2  -5   5 33198.9 678.792  34
  -2  -5   5 35365.8 692.373  43
  -2  -5   5 33179.0 684.026  39
  -2  -5   5 32162.3 868.008  23
  -2  -5   5 32728.3 688.517  30
  -2  -5   5 33358.3 689.209  12
  -2  -5   5 34438.3 685.846   6
  -2  -5   5 33434.4 687.770  48
  -2  -5   4 32.5921 13.2971  17
  -2  -5   4 43.8819 14.5759  43
  -2  -5   4 25.1968 12.4247   6
  -2  -5   4-15.3763 30.9024  44
  -2  -5   4 49.8003 16.3735  12
  -2  -5   4 39.3404 15.1853  48
  -2  -5   4 36.0201 37.1777  23
  -2  -5   4 46.7579 15.0131  39
  -2  -5   3 3585.67 115.139  48
  -2  -5   3 3596.48 224.483  44
  -2  -5   3 3666.63 216.168  23
   2   5  -3 3649.58 168.490  45
  -2  -5   3 3606.23 117.147  43
  -2  -5   2 14123.5 481.877  23
  -2  -5   2 13504.2 475.499  46
   2   5  -2 14811.7 423.061  45
  -2  -5   2 14343.5 324.093  43
  -2  -5   2 14191.4 491.175  44
  -2  -5   2 14182.8 322.369  48
  -2  -5   1 904.866 51.3848  48
   2   5  -1 1027.04 93.4637  45
  -2  -5   1 1000.49 110.328  46
  -2  -5   1 994.458 113.885  23
  -2  -5   1 927.840 51.3100  43
  -2  -5   1 902.763 107.612  44
  -2  -5   0 10208.6 242.872  48
  -2  -5   0 10062.4 383.975  46
  -2  -5   0 10235.1 387.697  23
  -2  -5   0 9686.77 385.418  44
  -2  -5   0 10023.2 242.688  43
   2   5   0 9996.26 343.214  45
  -2  -5  -1 12346.5 291.555  43
  -2  -5  -1 13012.3 446.759  46
  -2  -5  -1 12972.7 449.941  23
  -2  -5  -1 13868.9 438.731   3
   2   5   1 12515.9 406.656  45
  -2  -5  -1 13215.3 287.672  42
  -2  -5  -1 13334.2 456.683  44
  -2  -5  -1 12639.0 292.610  48
  -2  -5  -2 697.890 41.9675  42
  -2  -5  -2 783.274 101.307  44
  -2  -5  -2 715.834 43.8618  43
  -2  -5  -2 726.282 44.0904  48
  -2  -5  -2 746.320 94.9560  46
  -2  -5  -2 744.516 93.2173   3
  -2  -5  -2 708.795 95.6168  23
  -2  -5  -3 2064.43 151.611   3
  -2  -5  -3 2048.82 78.2842  48
  -2  -5  -3 1889.18 72.5791  42
  -2  -5  -3 1951.49 152.741  46
  -2  -5  -3 2074.28 79.5159  43
  -2  -5  -3 2271.08 165.455  44
  -2  -5  -3 1913.51 153.948  23
  -2  -5  -4 30448.5 815.414  46
  -2  -5  -4 31105.1 632.695  48
  -2  -5  -4 29251.7 809.230  44
  -2  -5  -4 31516.6 634.204  43
  -2  -5  -4 30227.3 819.357  23
  -2  -5  -5 63577.8 1393.59  46
  -2  -5  -5 59057.9 1383.69  23
  -2  -5  -5 64243.3 1403.70  44
  -2  -5  -5 59774.7 1171.86  43
  -2  -5  -5 59026.8 1170.72  48
  -2  -5  -6 31282.0 643.734  48
  -2  -5  -6 34294.3 852.988  46
  -2  -5  -6 31462.0 842.416  23
  -2  -5  -6 30369.8 625.502   2
  -2  -5  -6 33746.1 854.550  44
  -2  -5  -6 32735.9 646.035  43
  -2  -5  -7 35749.5 734.944  43
  -2  -5  -7 37801.3 725.211   2
  -2  -5  -7 36662.8 735.654  48
  -2  -5  -7 36058.0 940.455  23
  -2  -5  -8 4711.83 137.575  43
  -2  -5  -8 4456.04 245.526  44
  -2  -5  -8 4954.45 260.098  23
  -2  -5  -8 4949.79 134.748   2
  -2  -5  -8 4711.42 138.461  48
  -2  -5  -9 27018.7 593.675  16
  -2  -5  -9 29367.1 605.329  27
  -2  -5  -9 26650.8 762.953  23
  -2  -5  -9 27172.1 596.609  22
  -2  -5  -9 27609.1 576.248  43
  -2  -5  -9 27944.8 577.154  48
  -2  -5  -9 26951.3 761.375  44
  -2  -5  -9 28557.1 577.212   2
   2   5  10 22002.1 684.787  45
  -2  -5 -10 22778.5 464.898   2
  -2  -5 -10 21288.5 632.151  23
  -2  -5 -10 21999.0 479.199  41
  -2  -5 -10 19569.4 473.190  22
  -2  -5 -10 20418.4 622.471  44
  -2  -5 -11 3183.02 110.374   2
   2   5  11 2732.61 209.951  45
  -2  -5 -11 2689.70 111.801  41
   2   5  12 393.195 83.7120  45
  -2  -5 -12 314.094 38.6278  41
  -2  -5 -12 480.956 44.7265   2
  -2  -5 -13 831.190 60.5315  41
   2   5  13 927.172 120.661  45
  -2  -5 -13 867.137 61.4461   2
   2   5  14 8693.57 404.275  45
  -2  -5 -14 8919.61 245.011  41
   2   5  15 25291.1 579.151  13
  -2  -5 -15 26350.2 561.458   9
  -2  -5 -16 5053.25 156.692   9
   2   5  16 4780.29 166.412  13
  -2  -5 -17 2069.21 87.8816   9
   2   5  17 2012.75 96.0146  13
  -2  -5 -18 1059.79 59.0104  38
   2   5  18 1043.90 64.6522  13
  -2  -5 -18 1132.86 60.3381   9
  -2  -5 -19 330.804 30.8668  38
   2   5  19 333.213 35.1882  13
  -2  -5 -19 352.603 31.7130   9
  -2  -5 -20 539.010 31.0557  38
   2   5  20 565.851 37.0759  13
[truncated: 1,193,647 more chars]
