# Supplementary material for: Study of DNA Interaction and Cytotoxicity Activity of Oxidovanadium(V) Complexes with ONO Donor Schiff Base Ligands
Source: MDPI journal article supplement (doi:10.3390/inorganics9090066), 2021-08-27
Supplement: s1 [file s1 › ESI.pdf]

## Supporting Information

# Study of DNA interaction and cytotoxicity activity of oxidovanadium(V) complexes having ONO donor Schiff base ligands

Gurunath Sahu <sup>1</sup>, Edward R. T. Tiekink <sup>2</sup> and Rupam Dinda <sup>1,\*</sup>

<sup>1</sup> Department of Chemistry, National Institute of Technology, Rourkela, 769008 Odisha, India.  
E-mail: 518cy1003@nitrkl.ac.in

<sup>2</sup> Research Centre for Crystalline Materials, School of Medical and Life Sciences, Sunway University, 47500 Bandar Sunway, Selangor Darul Ehsan, Malaysia

\* Correspondence: rupamdinda@nitrkl.ac.in

**Figure S1.** IR spectra of H<sub>2</sub>L (a) and complex **1**

**Figure S2.** <sup>1</sup>H NMR of H<sub>2</sub>L in DMSO-d<sub>6</sub>

**Figure S3-S5.** <sup>1</sup>H, <sup>13</sup>C, and <sup>51</sup>V NMR spectra of **1** DMSO-d<sub>6</sub>

**Figure S6-S7.** <sup>1</sup>H and <sup>51</sup>V NMR of **2** in DMSO-d<sub>6</sub>

**Figure S8-S9.** ESI-MS of **1** and **2**

**Figure S10.** Molecular structures of independent complex anion and cation showing atom labelling

**Figure S11.** A view in projection down the b-axis of the unit-cell contents for salt **1**

**Table S1.** Geometric parameters (Å, °) characterizing identified intermolecular contacts in salt **1**

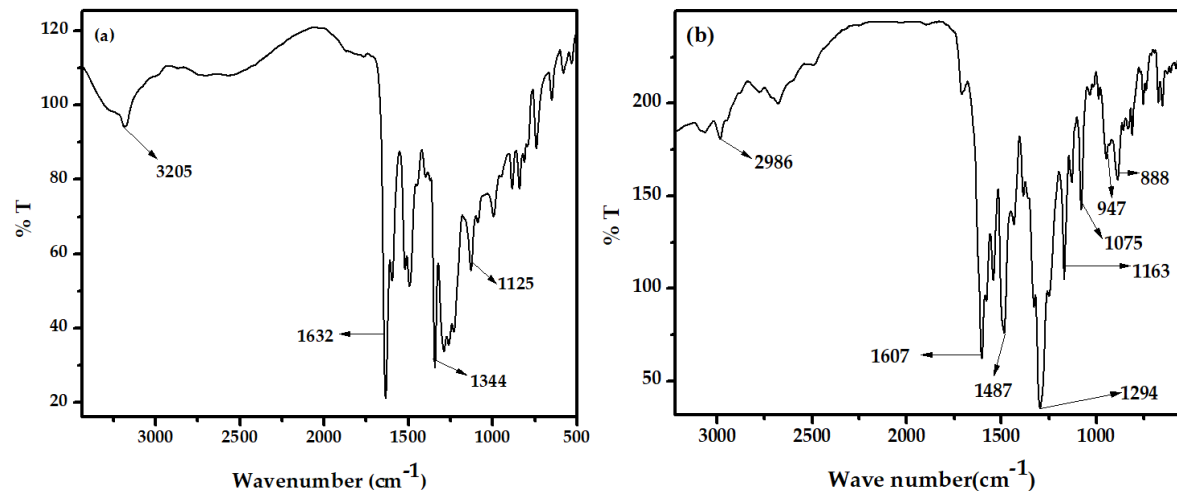

**Figure S1.** IR spectra of H<sub>2</sub>L (a) and complex **1** (b)

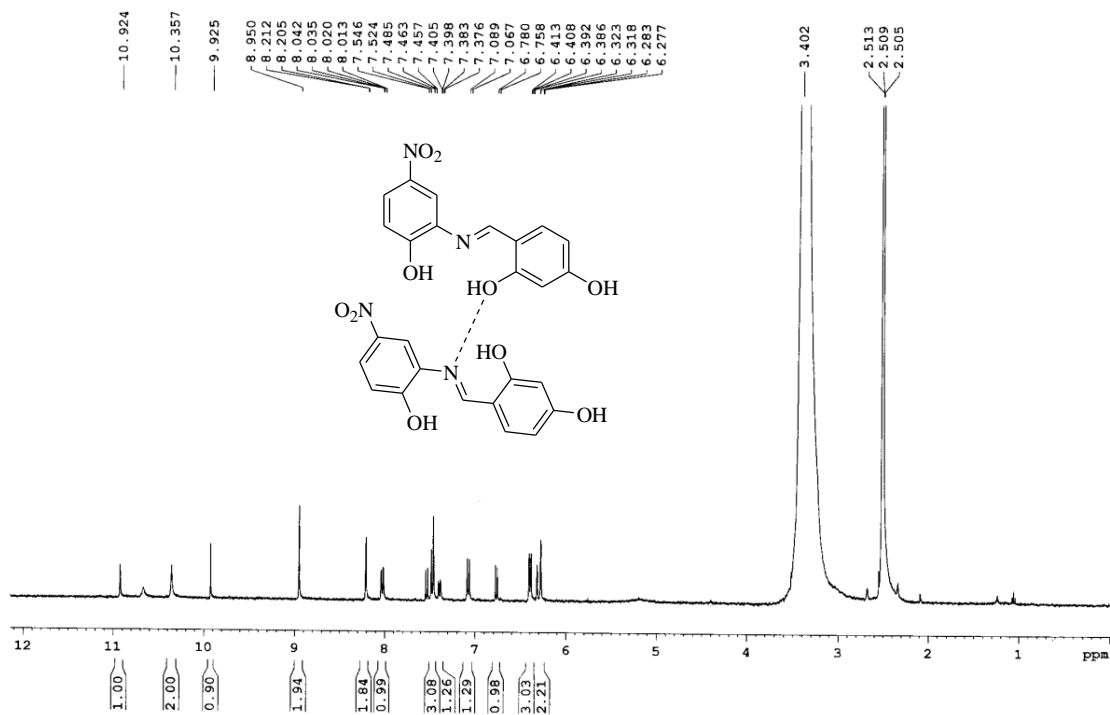

Figure S2. <sup>1</sup>H NMR of H<sub>2</sub>L ligand in DMSO-d<sub>6</sub>.

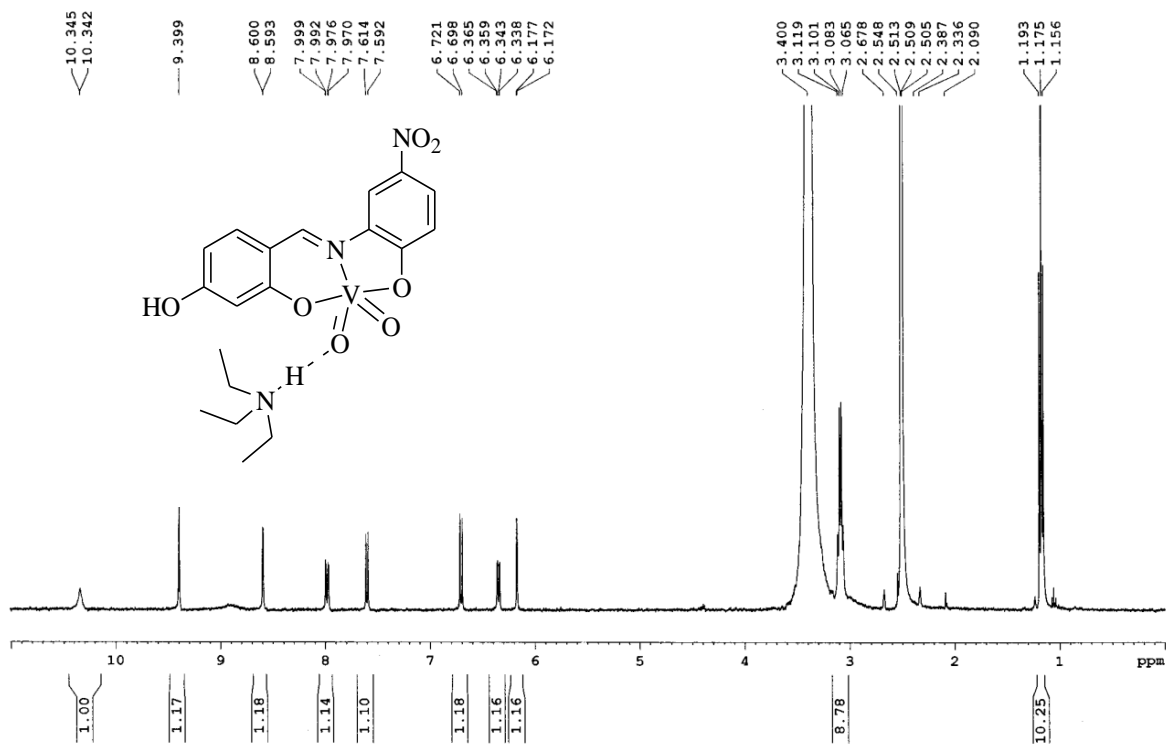

Figure S3. <sup>1</sup>H NMR spectra of 1 DMSO-d<sub>6</sub>

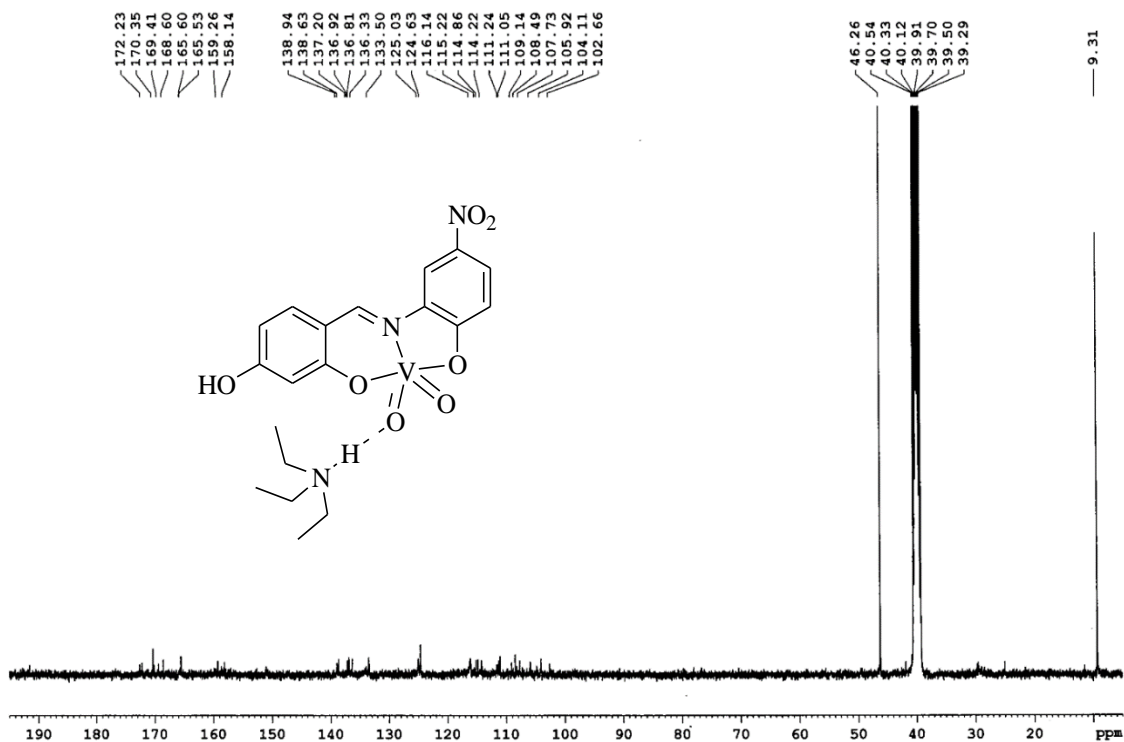

Figure S4. <sup>13</sup>C NMR spectra of 1 DMSO-d<sub>6</sub>

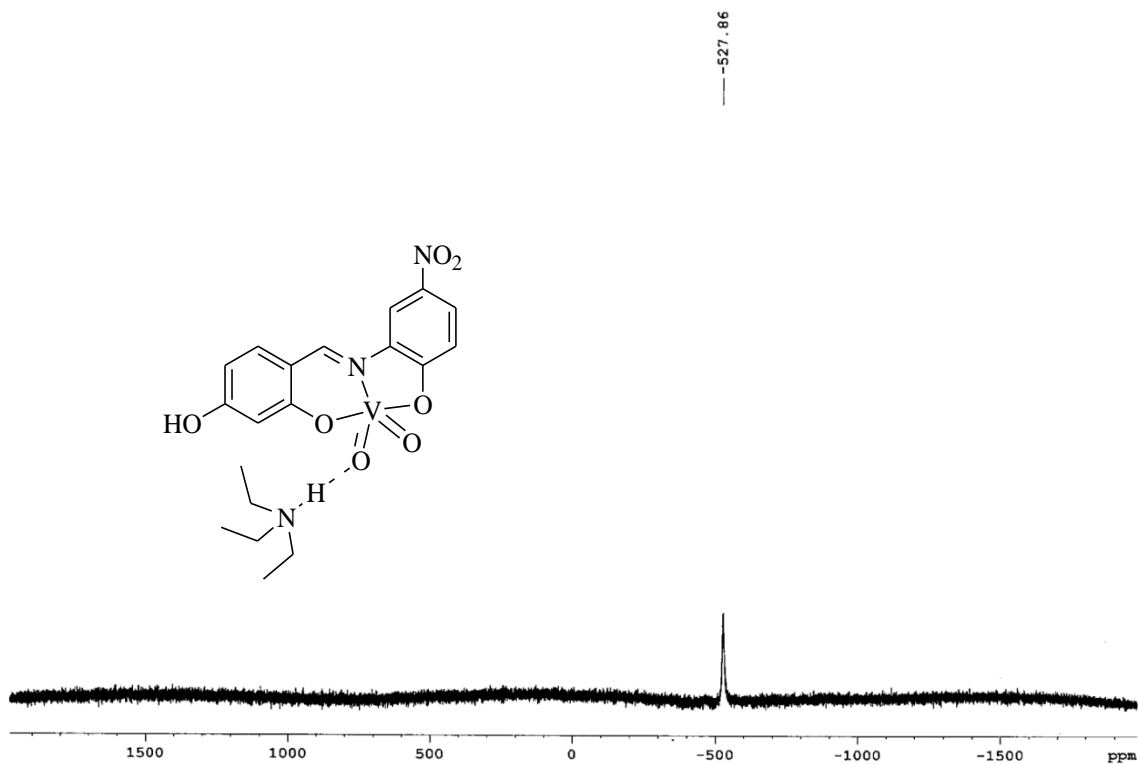

Figure S5. <sup>51</sup>V NMR spectra of 1 DMSO-d<sub>6</sub>

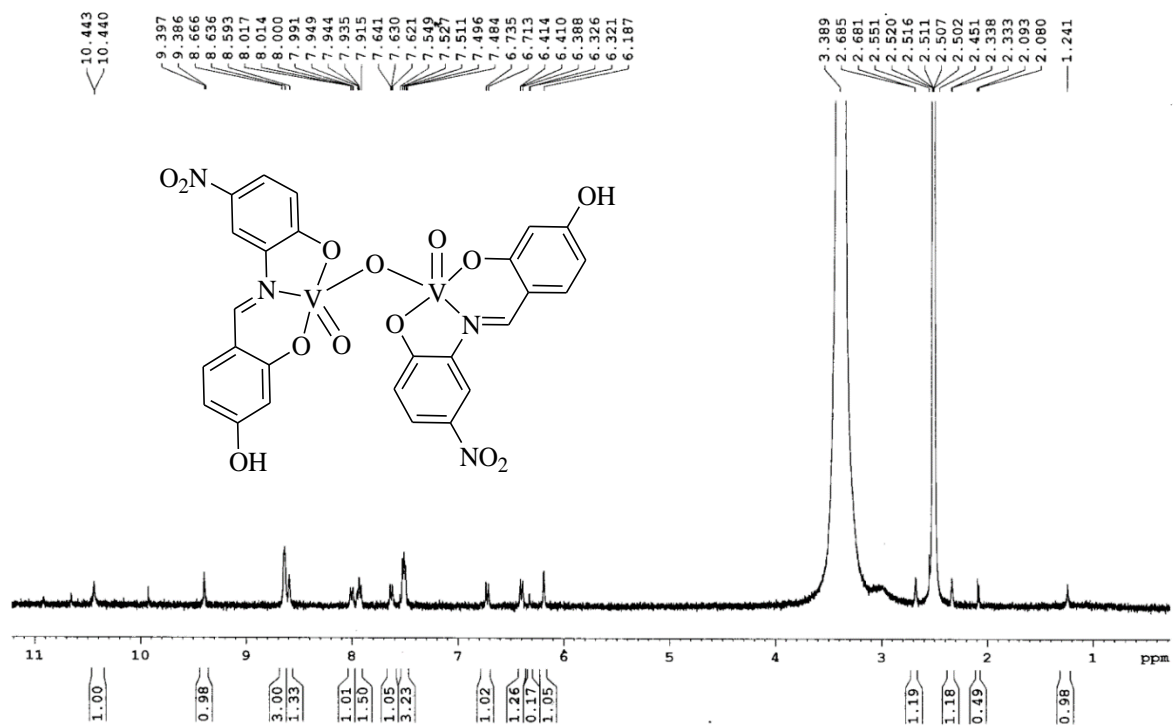

Figure S6. <sup>1</sup>H NMR spectra of 2 DMSO-d<sub>6</sub>

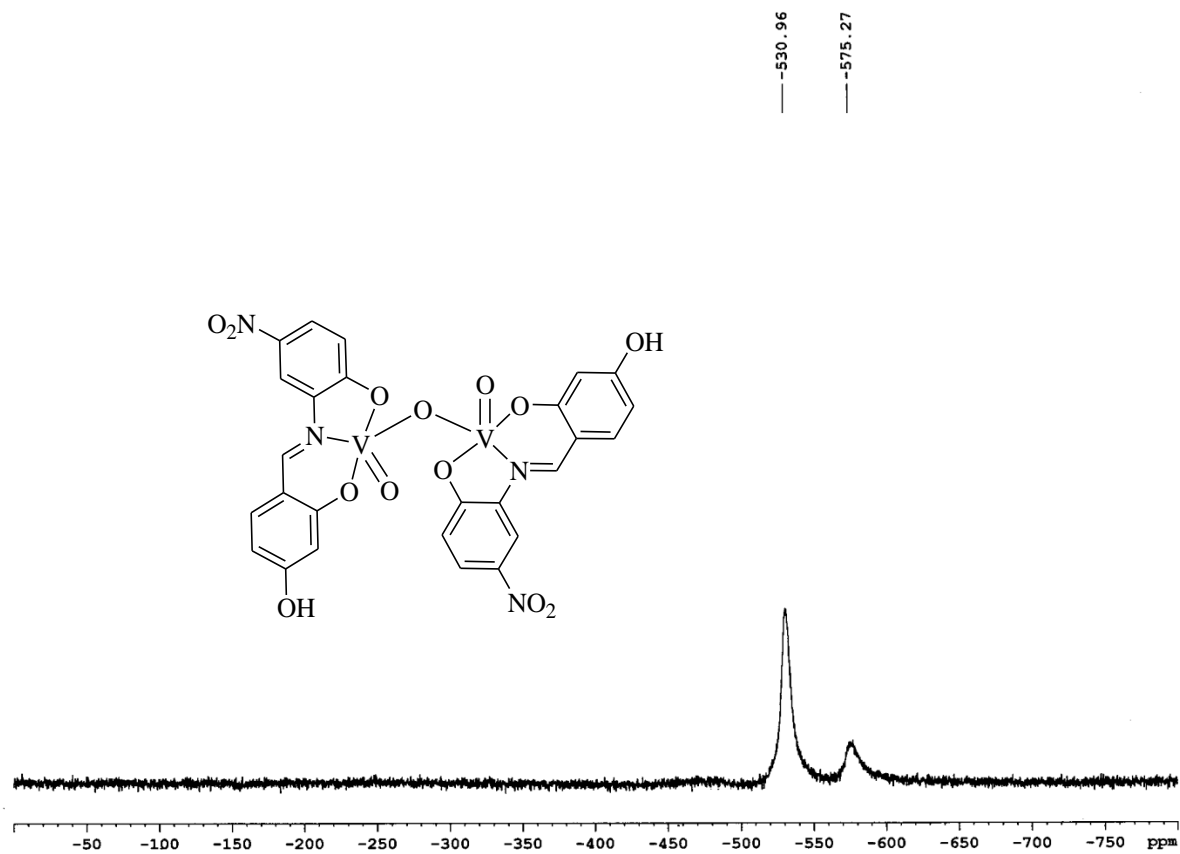

Figure S7. <sup>51</sup>V NMR spectra of 2 DMSO-d<sub>6</sub>

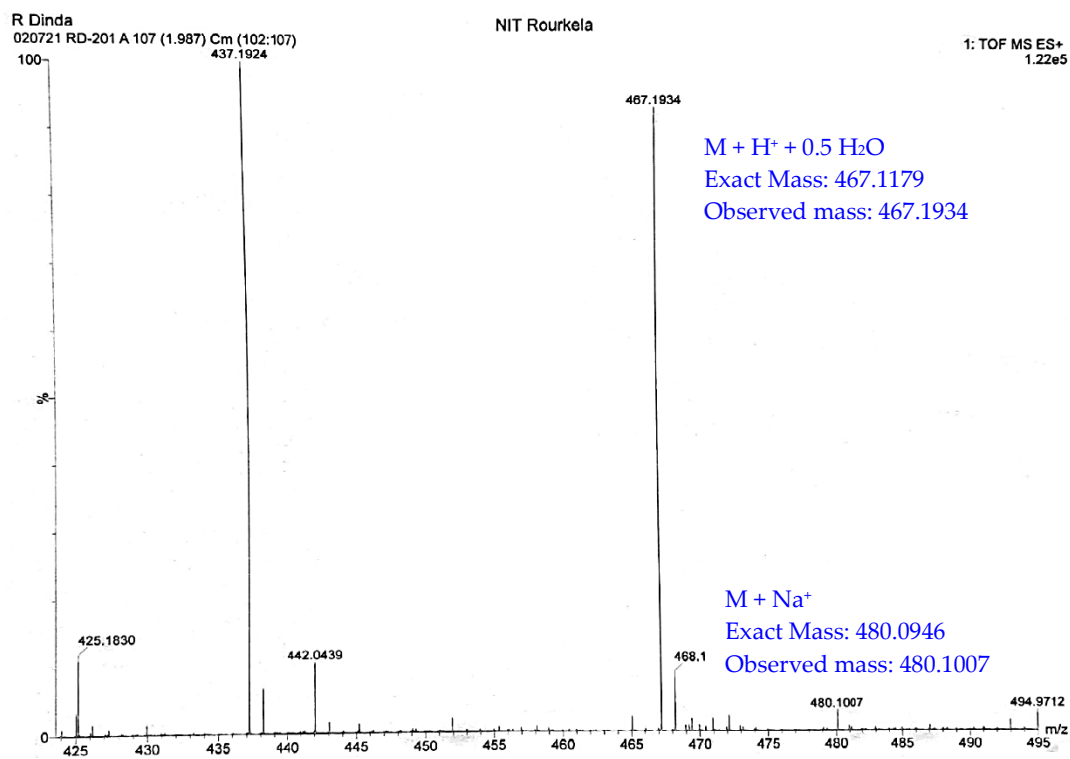

Figure S8. ESI-MS of **1** (100 pmol/ $\mu$ L) in MeCN (recorded in the positive ion mode).

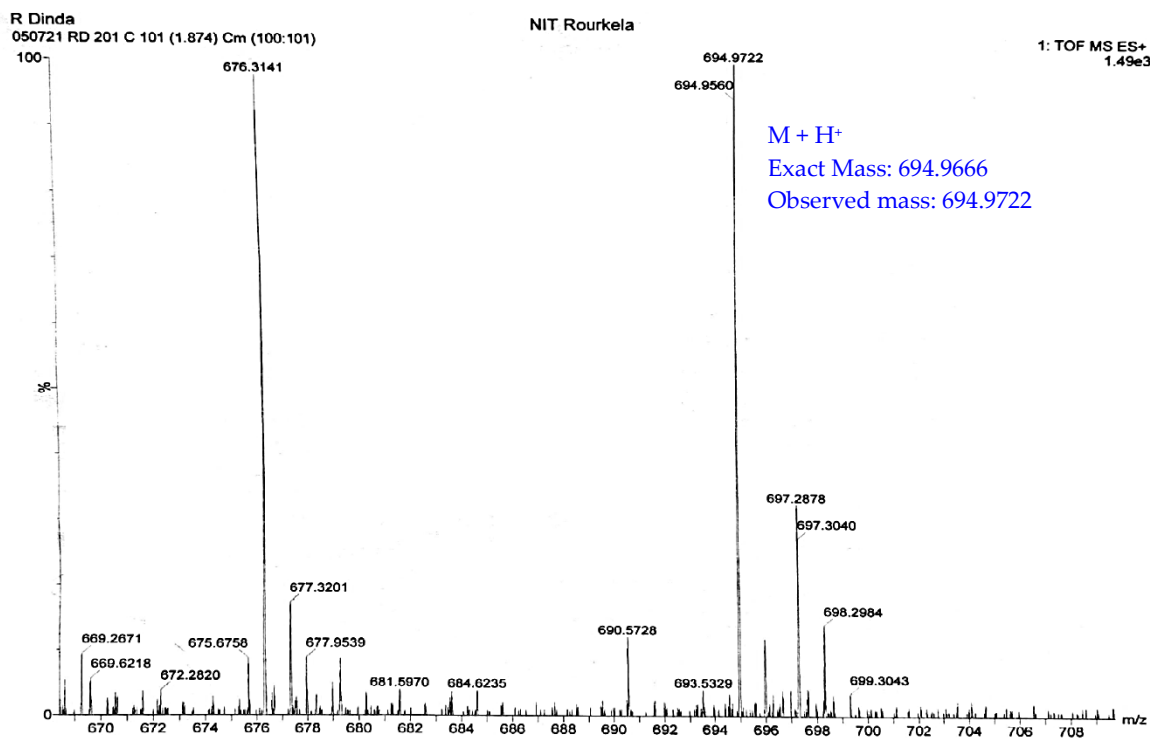

Figure S9. ESI-MS of **2** (100 pmol/ $\mu$ L) in MeCN (recorded in the positive ion mode).

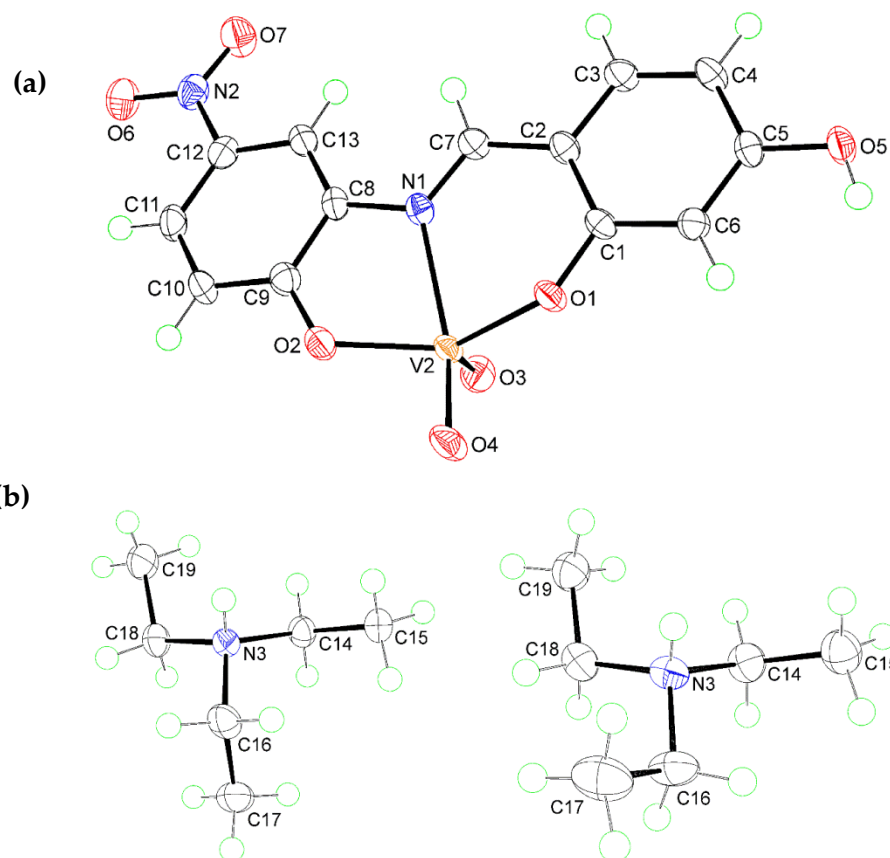

**Figure S10.** Molecular structures of (a) the second independent complex anion and (b) the two independent cations of salt **1** showing atom labelling scheme and displacement ellipsoids at the 70% probability level.

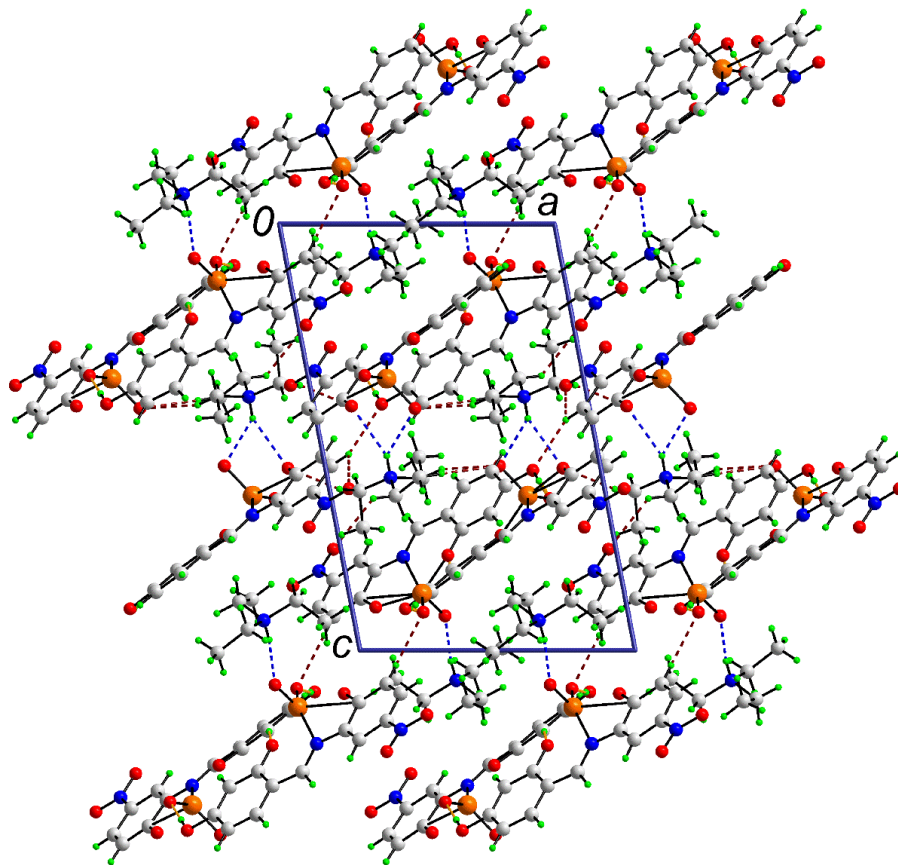

**Figure S11.** A view in projection down the *b*-axis of the unit-cell contents for salt **1**. The O–H···O, N–H···O and C–H···O interactions are indicated by orange, blue and brown dashed lines, respectively.

**Table S1.** Geometric parameters (Å, °) characterizing identified intermolecular contacts in salt **1**

| A         | H    | B   | H···B | A···B      | A–H···B | symmetry             |
|-----------|------|-----|-------|------------|---------|----------------------|
| operation |      |     |       |            |         |                      |
| C6a       | H6a  | O1b | 2.48  | 3.4151(16) | 170     | <i>x, y, z</i>       |
| C6b       | H6b  | O1a | 2.60  | 3.4842(16) | 155     | <i>x, y, z</i>       |
| C10b      | H10b | O4b | 2.39  | 3.1704(17) | 140     | <i>-x, -y, 2-z</i>   |
| C11a      | H11a | O5b | 2.46  | 3.1509(17) | 130     | <i>2-x, 1-y, 1-z</i> |
| C14a      | H14a | O3a | 2.49  | 3.4377(17) | 159     | <i>1-x, 1-y, 1-z</i> |
| C16a      | H16b | O2a | 2.56  | 3.5241(17) | 165     | <i>2-x, 1-y, 1-z</i> |
| C18a      | H18a | O7b | 2.53  | 3.2637(18) | 131     | <i>1-x, -y, 1-z</i>  |

|      |      |     |      |            |     |                                         |
|------|------|-----|------|------------|-----|-----------------------------------------|
| C19a | H19c | O3a | 2.55 | 3.5338(19) | 179 | 1- <i>x</i> , 1- <i>y</i> , 1- <i>z</i> |
|------|------|-----|------|------------|-----|-----------------------------------------|
